# Supplementary material
Source: PubMed Central journal article supplement (PMC6996792)
Supplement: NIHMS1551088-supplement-SI.pdf [file NIHMS1551088-supplement-SI.pdf]

# Supplementary Material

For

Atropospecific Total Synthesis of Tryptorubin A

By

Solomon H. Reisberg, Yang Gao, Allison S. Walker,  
Eric J.N. Helfrich, Jon Clardy\*, and Phil S. Baran\*

|                                                               |           |
|---------------------------------------------------------------|-----------|
| <b>Experimental procedures (synthesis)</b> .....              | <b>4</b>  |
| General remarks .....                                         | 4         |
| <b>Figure S1, Detailed route to compound 1b</b> .....         | <b>5</b>  |
| <b>Figure S2, Detailed route to compound 4</b> .....          | <b>6</b>  |
| <b>Figure S3, Detailed route to compound 1a</b> .....         | <b>7</b>  |
| <b>Figure S4, Abridged summary of failed approaches</b> ..... | <b>8</b>  |
| <b>Figure S5, Skeletal numbering system for 1</b> .....       | <b>11</b> |
| <b>Compound experimentals</b> .....                           | <b>11</b> |
| SI-02 .....                                                   | 11        |
| SI-03 .....                                                   | 12        |
| SI-05 .....                                                   | 12        |
| Compound 2 .....                                              | 13        |
| SI-06 .....                                                   | 14        |
| <b>Table S1, optimization of Ullman cyclization</b> .....     | <b>16</b> |
| Compound 3 .....                                              | 17        |
| Compound 5 .....                                              | 17        |
| SI-08 .....                                                   | 18        |
| SI-09 .....                                                   | 19        |
| SI-10 .....                                                   | 20        |
| SI-11 .....                                                   | 20        |
| SI-13 .....                                                   | 21        |
| Compound 4 .....                                              | 22        |
| SI-14 .....                                                   | 22        |
| Compound 6 .....                                              | 23        |
| SI-15 .....                                                   | 24        |
| SI-16 .....                                                   | 26        |
| Compound 8 .....                                              | 27        |
| SI-17 .....                                                   | 28        |
| atrop-tryptorubin A (1b) .....                                | 29        |
| SI-18 .....                                                   | 30        |
| Compound 7 .....                                              | 31        |
| Compound 10 .....                                             | 32        |
| Compound 11 .....                                             | 33        |
| SI-19 .....                                                   | 34        |
| Compound 9 .....                                              | 35        |
| Compound 12 .....                                             | 36        |
| <b>Table S2, optimization of macrolactamization</b> .....     | <b>37</b> |
| SI-20 .....                                                   | 38        |
| Synthetic tryptorubin A (1a): .....                           | 39        |
| <i>Epi</i> -SI-02 .....                                       | 40        |
| <i>Epi</i> -SI-03 .....                                       | 41        |
| <i>Epi</i> -2 .....                                           | 41        |
| <i>Epi</i> -SI-06 .....                                       | 42        |
| <i>Epi</i> -3 .....                                           | 43        |
| <i>Epi</i> -5 .....                                           | 43        |
| <i>Epi</i> -SI-14 .....                                       | 44        |
| <i>Epi</i> -6 .....                                           | 45        |
| <i>Epi</i> -SI-15 .....                                       | 46        |
| <i>Epi</i> -SI-16 .....                                       | 47        |
| <i>Epi</i> -8 .....                                           | 48        |

|                                                                                                                                |            |
|--------------------------------------------------------------------------------------------------------------------------------|------------|
| <i>Epi</i> -SI-21.....                                                                                                         | 49         |
| <b>Comparison of natural tryptorubin A, synthetic tryptorubin A (1a), and atrop-tryptorubin A (1b).....</b>                    | <b>51</b>  |
| Table S3, Reassigned chemical shifts for natural isolate (1a).....                                                             | 51         |
| Table S4, Comparison of <sup>1</sup> H and <sup>13</sup> C shifts of natural isolate vs. <i>atrop</i> -tryptorubin A (1b)..... | 54         |
| Table S5, Comparison of <sup>1</sup> H and <sup>13</sup> C shifts of natural isolate vs. synthetic tryptorubin A (1a).....     | 56         |
| Table S6, Comparison of HMBC of natural isolate, synthetic tryptorubin A (1a), and <i>atrop</i> -tryptorubin A (1b).....       | 58         |
| Table S7, Comparison of ROESY of natural isolate, synthetic tryptorubin A (1a), and <i>atrop</i> -tryptorubin A (1b).....      | 59         |
| 2D NMR spectra for compound 1a (synthetic and natural).....                                                                    | 61         |
| 2D NMR spectra for compound 1b.....                                                                                            | 67         |
| Explanation of NMR analysis of the two atropisomers.....                                                                       | 71         |
| Table S8, Conditions that cyclize 8 but not <i>epi</i> -8.....                                                                 | 75         |
| Figure S10, nOe data that supports regiochemical assignment.....                                                               | 76         |
| Figure S11, nOe data that supports topoisomerism.....                                                                          | 77         |
| Stacked NMR spectra of natural and synthetic tryptorubin A.....                                                                | 78         |
| LCMS co-injection of natural tryptorubin A, synthetic 1a, and synthetic 1b.....                                                | 80         |
| <b>NMR spectra: .....</b>                                                                                                      | <b>82</b>  |
| <b>DFT calculations and conclusions.....</b>                                                                                   | <b>146</b> |
| <b>X-ray crystal structures.....</b>                                                                                           | <b>156</b> |
| <b>Tryptorubin biosynthesis.....</b>                                                                                           | <b>184</b> |

## Experimental procedures (synthesis)

### General remarks

All reactions were carried out under an inert argon atmosphere with dry solvents under anhydrous conditions unless otherwise stated. Dry acetonitrile (MeCN), dichloromethane (DCM), diethyl ether (Et<sub>2</sub>O), tetrahydrofuran (THF), toluene (PhMe), dimethylformamide (DMF), benzene, and triethylamine (TEA) were obtained by passing the previously degassed solvents through activated alumina columns. Reagents were purchased at the highest commercial quality and used without further purification, unless otherwise stated. Yields refer to chromatographically and spectroscopically (<sup>1</sup>H NMR or LCMS) homogeneous material, unless otherwise stated. Reactions were monitored by thin layer chromatography (TLC) carried out on 0.25 mm E. Merck silica plates (60F-254), using UV light as the visualizing agent and/or phosphomolybdic acid and heat as a developing agent. Flash silica gel chromatography was performed using E. Merck silica gel (60, particle size 0.043 – 0.063 mm). NMR spectra were recorded on Bruker DRX-600 and AMX-400 instruments and were calibrated using residual undeuterated solvent as an internal reference (chloroform-*d*: <sup>1</sup>H NMR  $\delta$  = 7.26 ppm, <sup>13</sup>C NMR  $\delta$  = 77.16 ppm). The following abbreviations were used to explain NMR peak multiplicities: s = singlet, d = doublet, t = triplet, q = quartet, m = multiplet, br = broad. High-resolution mass spectra (HRMS) were recorded on an Agilent LC/MSD TOF mass spectrometer by electrospray ionization time-of-flight (ESI-TOF) reflectron experiments.



**Figure S1, Detailed route to compound 1b**

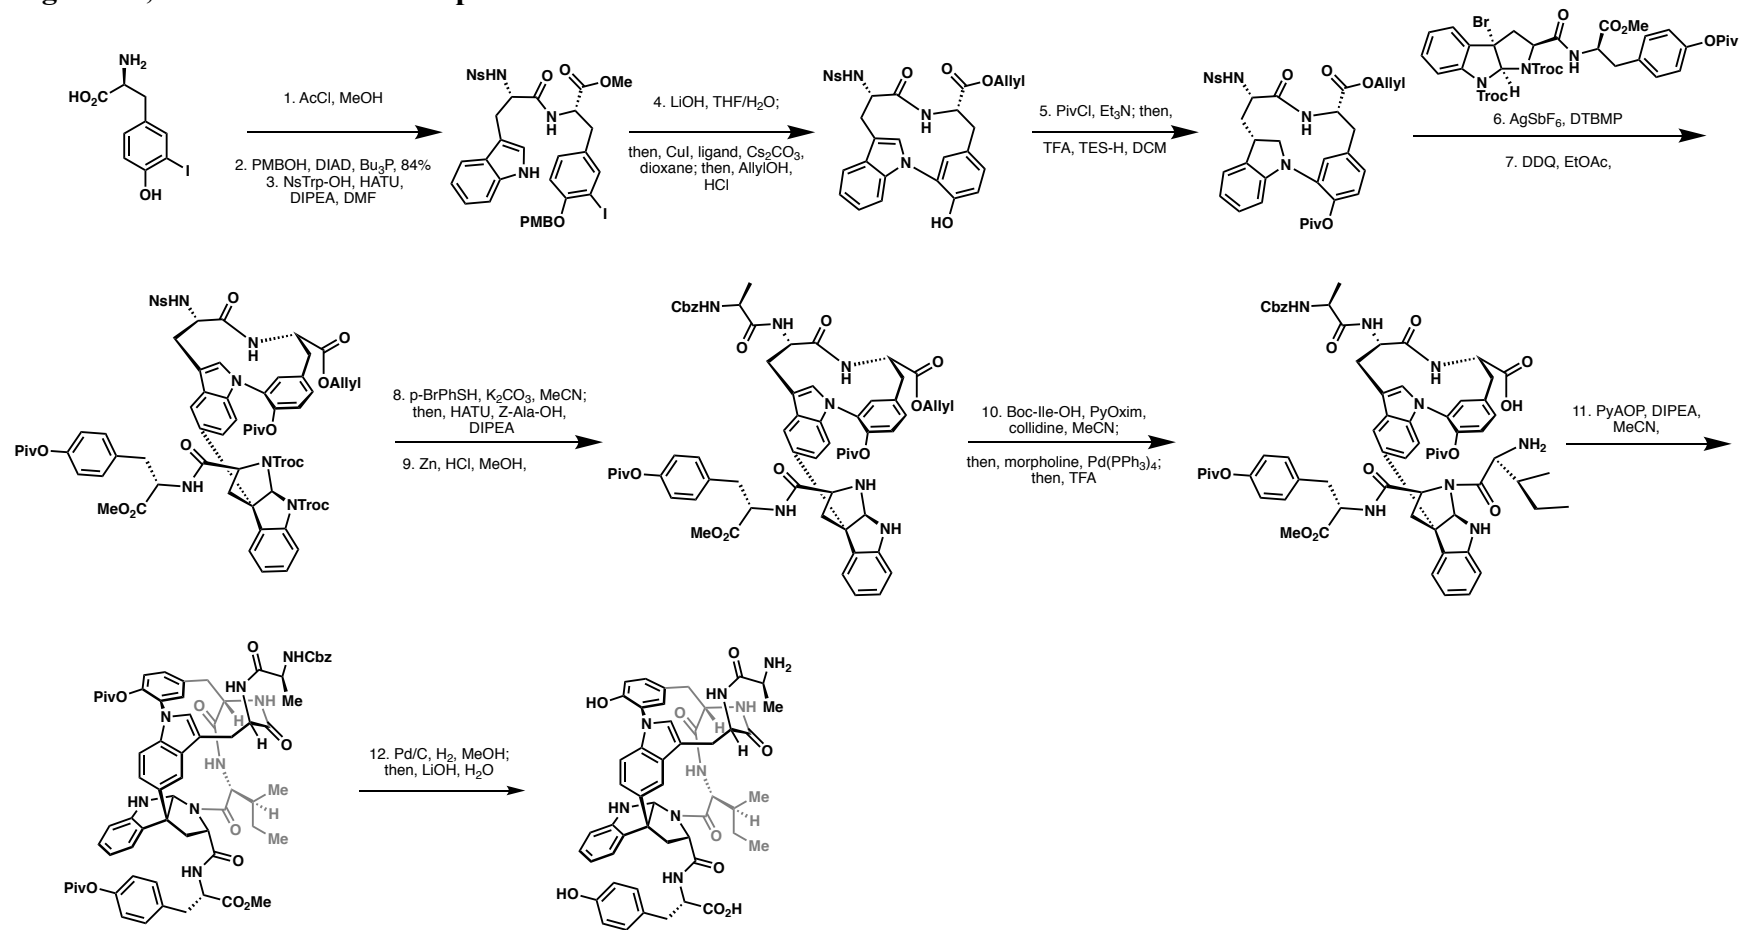

Figure S2, Detailed route to compound 4

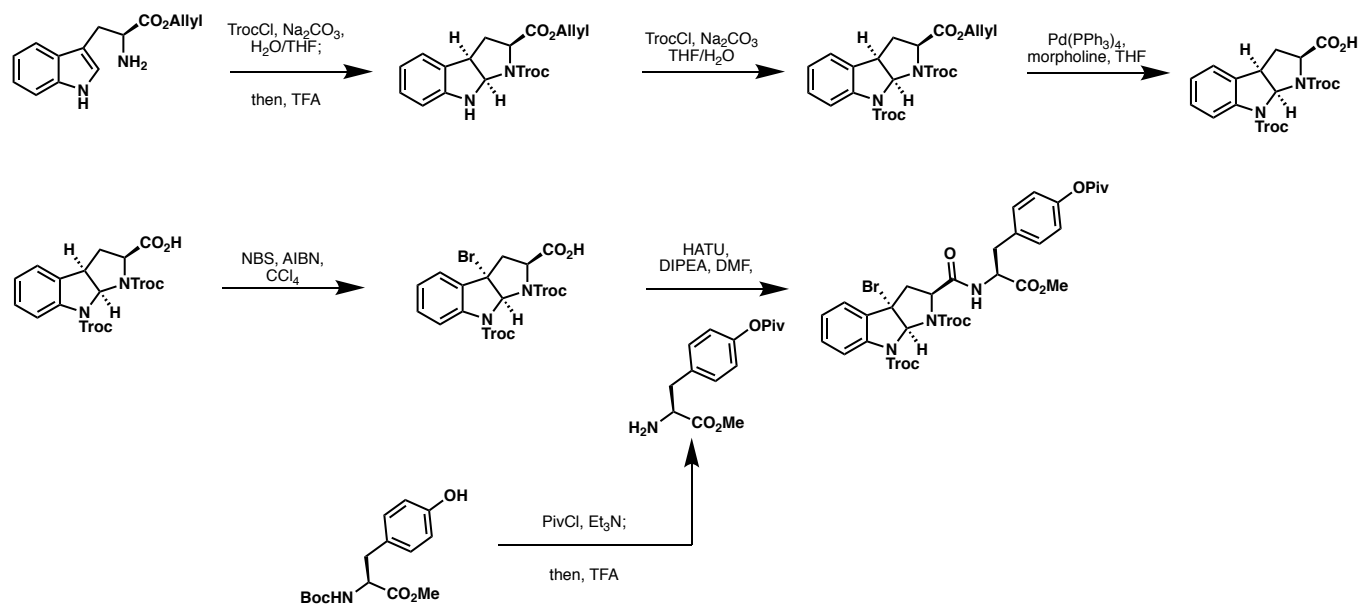

Figure S3, Detailed route to compound 1a

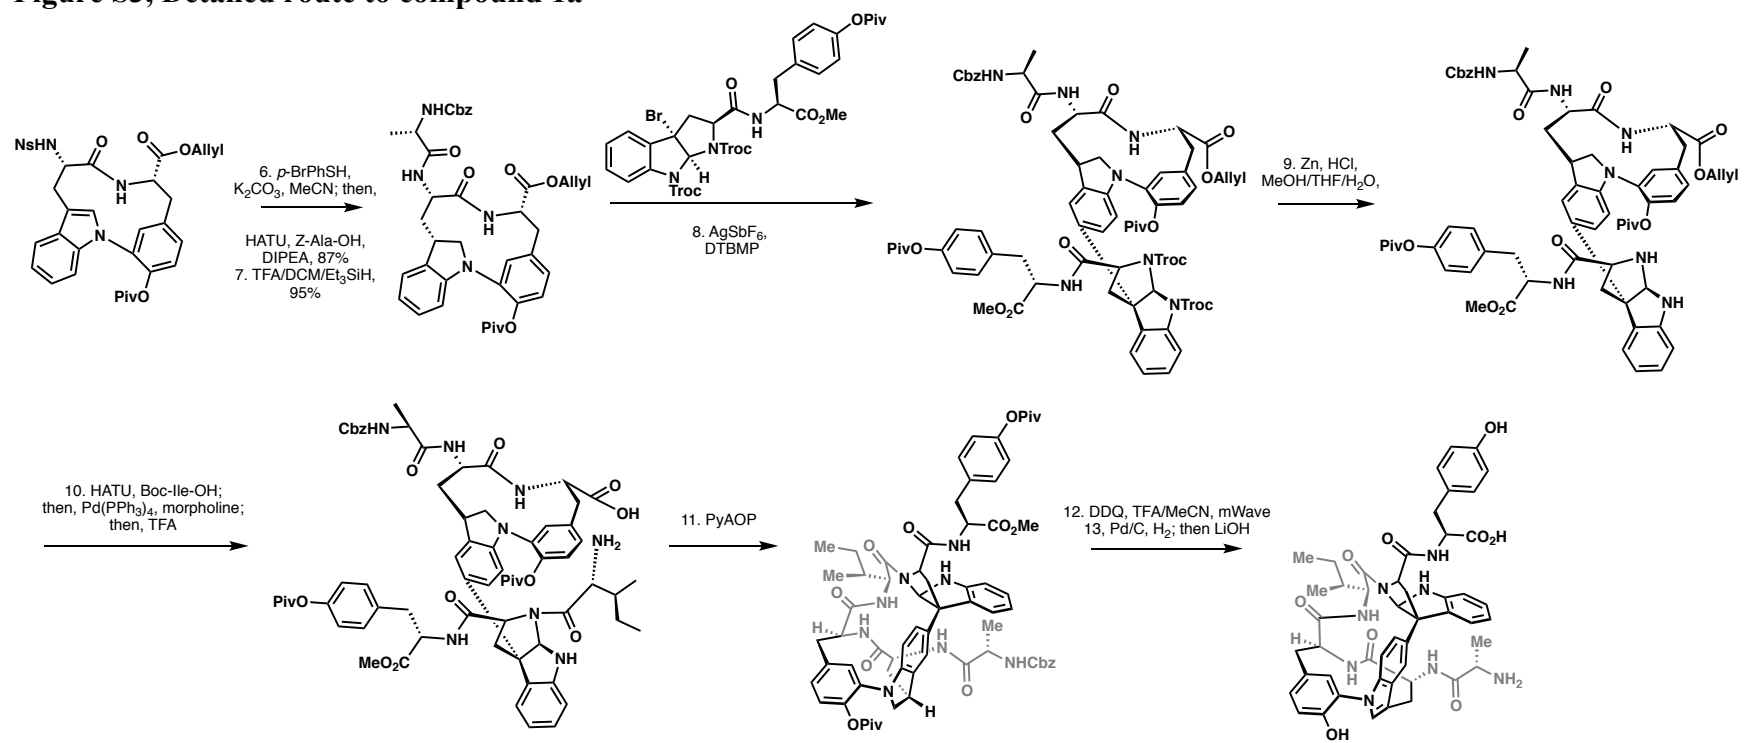

**Figure S4, Abridged summary of failed approaches**

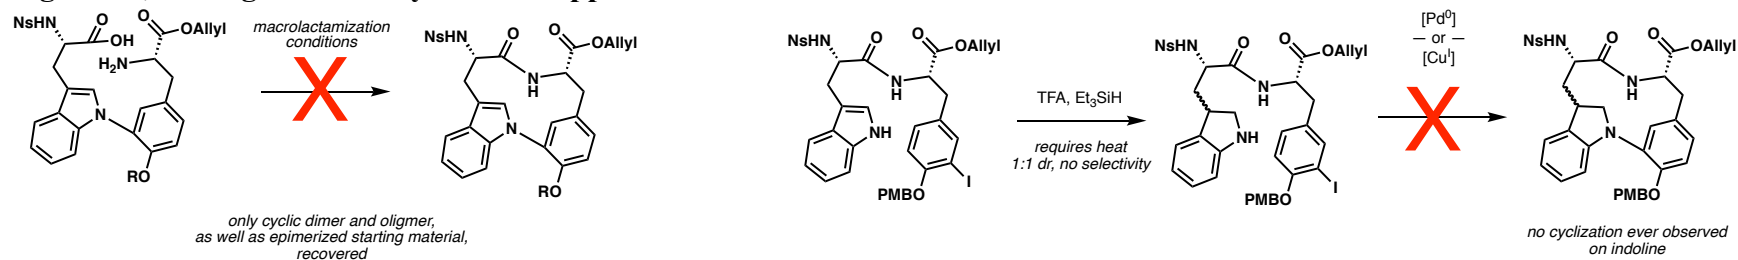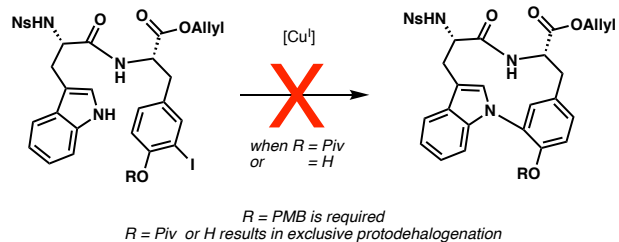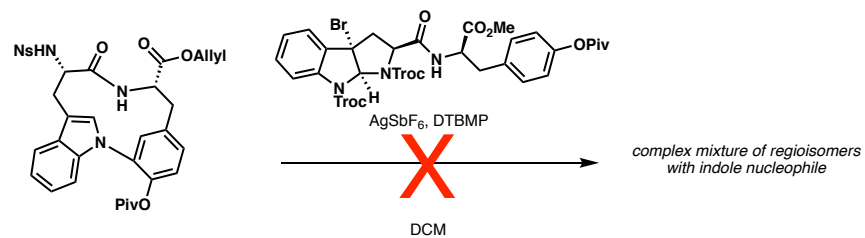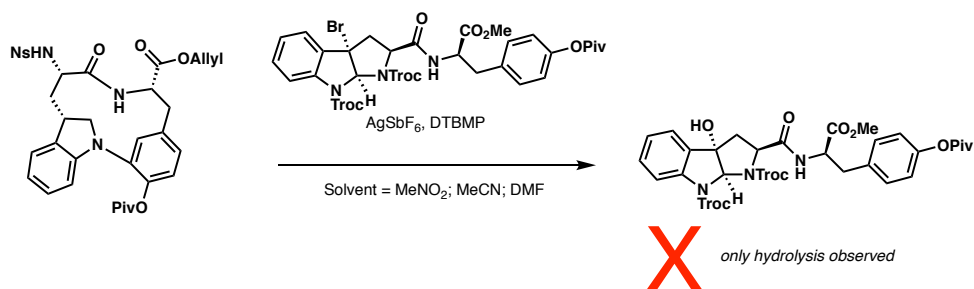

Figure S4, Abridged summary of failed approaches (cont.)

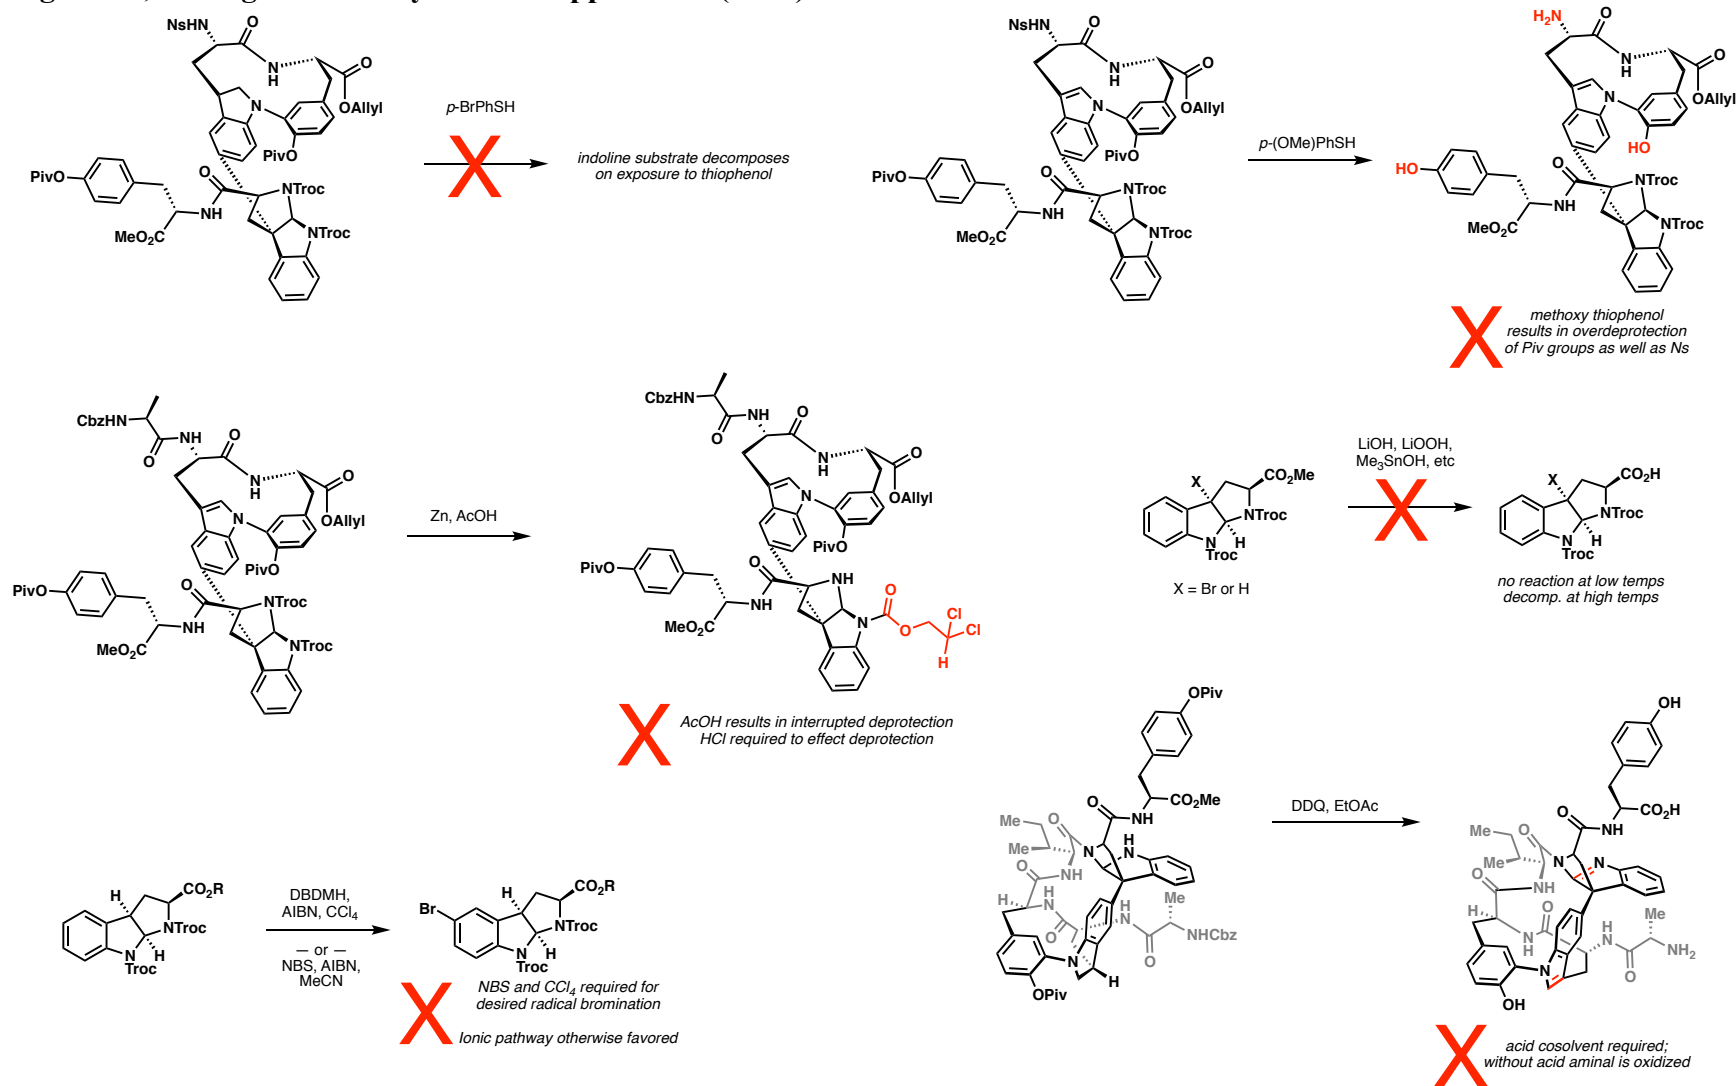

## Figure S4, Abridged summary of failed approaches (cont.)

### Ring contraction strategies for lactam closure

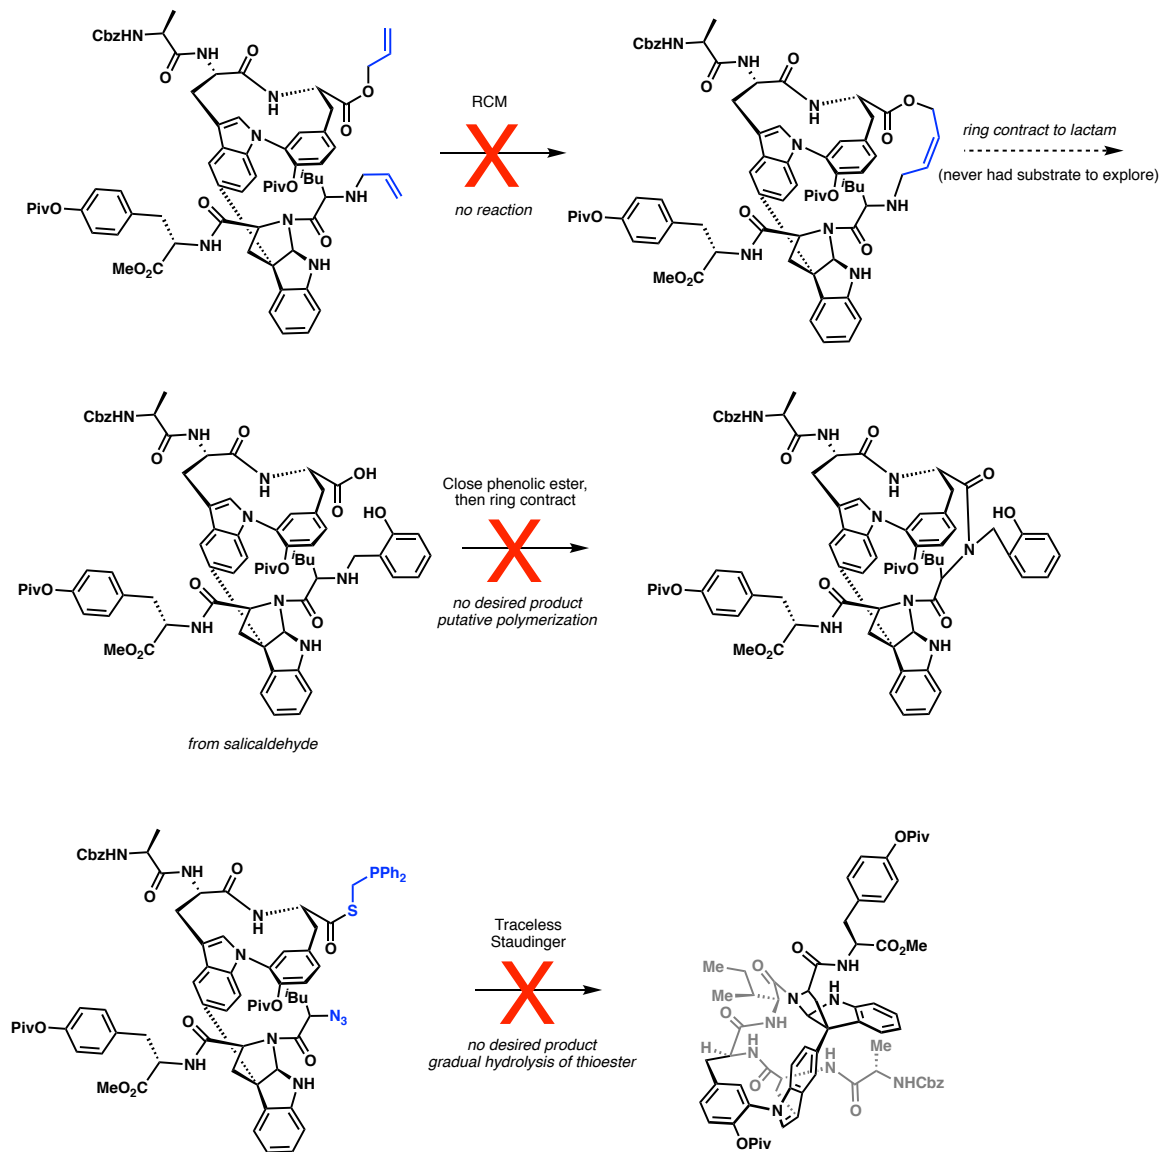

Figure S5, Skeletal numbering system for **1**

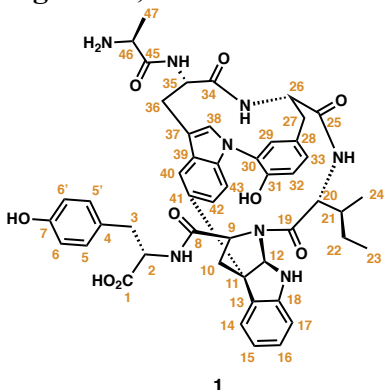

## Compound experimentals

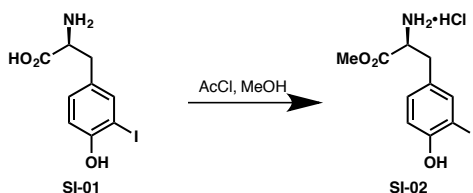

### SI-02

To MeOH (200 mL) at 0 °C was added AcCl (14 mL, 200 mmol, 2.0 equiv) dropwise. *L*-3-iodotyrosine **SI-01** (30.7 g, 100 mmol, 1 equiv) was then added as a solid in a single portion. The mixture was heated to reflux and stirred for 2 h, at which time LC/MS analysis showed complete consumption of starting material. The mixture was concentrated *via* rotary evaporation to yield the title product's HCl salt (35.5 g, quant.) as a white solid.

Spectral data matched previous reports;<sup>30</sup> the <sup>1</sup>H NMR data is provided here for convenience.

**<sup>1</sup>H NMR:** (400 MHz, CD<sub>3</sub>OD) δ 7.62 (d, *J* = 2.1 Hz, 1H), 7.09 (dd, *J* = 8.1, 2.0 Hz, 1H), 6.84 (d, *J* = 8.2 Hz, 1H), 4.27 (t, *J* = 6.7 Hz, 1H), 3.84 (s, 3H), 3.16 (dd, *J* = 14.6, 6.0 Hz, 1H), 3.05 (dd, *J* = 14.6, 7.6 Hz, 1H).

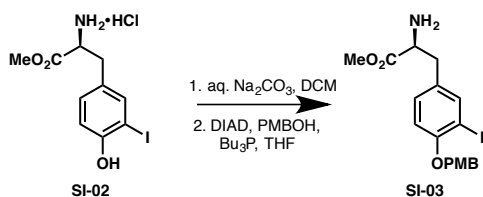

<sup>30</sup> He, C., Stratton, T.P.; Baran, P.S. *J. Am. Chem. Soc.*, **2019**, *141*, 29.

### SI-03

Immediately before use in the Mistunobu reaction, the amine freebase was prepared according to the following procedure: *L*-3-iodotyrosine methyl ester hydrochloride **SI-02** (35.5 g, 100 mmol, 1 equiv) was partitioned between aqueous Na<sub>2</sub>CO<sub>3</sub> (saturated, 300 mL), and DCM (100 mL) and the layers were separated. The aqueous layer was extracted with additional DCM (2 X 100 mL). The combined organics were dried (MgSO<sub>4</sub>) and concentrated *via* rotary evaporation to give the amine freebase as a yellow foam (32.1 g).

A solution of the resultant *L*-3-iodotyrosine methyl ester freebase (32.1 g, 100 mmol, 1 equiv), paramethoxybenzyl alcohol (16 mL, 130 mmol, 1.3 equiv), and tri-*n*-butylphosphine (32 mL, 130 mmol, 1.3 equiv) in THF (500 mL) was cooled to 0 °C. Diisopropylazodicarboxylate (25 mL, 130 mmol, 1.3 equiv) was added dropwise. The mixture was allowed to warm to rt, then stirred for 30 min, at which time LC/MS analysis showed complete consumption of starting material. The mixture was concentrated *via* rotary evaporation, and the resulting orange residue was taken up in Et<sub>2</sub>O (200 mL), then extracted with HCl (1 M, 3 X 100 mL). The combined aqueous layer was basified to pH 10 *via* portionwise addition of solid Na<sub>2</sub>CO<sub>3</sub>, then extracted with EtOAc (3 X 150 mL). The combined organics were washed with brine (50 mL), dried (MgSO<sub>4</sub>), and concentrated *via* rotary evaporation to give **SI-03** as a yellow foam (37.0 g, 81%) of sufficient purity to carry forward. Analytically pure samples could be isolated via preparative TLC (SiO<sub>2</sub>, 5% MeOH/DCM with 1% Et<sub>3</sub>N):

$$[\alpha]_D^{20} = -11.4 (c = 0.7, \text{CHCl}_3);$$

<sup>1</sup>H NMR (600 MHz, CD<sub>3</sub>OD): δ 7.63 (d, *J* = 2.2 Hz, 1H), 7.43 – 7.40 (m, 2H), 7.15 (dd, *J* = 8.4, 2.2 Hz, 1H), 6.96 – 6.92 (m, 3H), 5.07 (s, 2H), 4.60 (s, 1H), 3.81 (s, 3H), 3.68 (s, 3H), 2.92 (dd, *J* = 13.7, 6.3 Hz, 1H), 2.86 (dd, *J* = 13.7, 6.8 Hz, 1H).

<sup>13</sup>C NMR (151 MHz, CD<sub>3</sub>OD): δ 176.0, 161.0, 157.9, 141.2, 132.7, 131.5, 130.2, 130.0, 114.9, 114.1, 87.4, 71.9, 56.6, 55.7, 52.4, 40.2.

HRMS: Calc'd for C<sub>18</sub>H<sub>21</sub>INO<sub>4</sub>, [M+H]<sup>+</sup>, 442.0510; found, 442.0515.

*R*<sub>f</sub> = 0.32 (Hex:EtOAc = 1:5; UV, Ce<sub>2</sub>(SO<sub>4</sub>)<sub>3</sub> in phosphomolybdic acid)

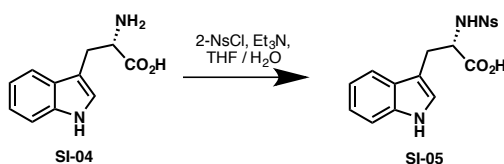

### SI-05

To a solution of *L*-tryptophan **SI-04** (20.4 g, 100 mmol, 1 equiv) and Et<sub>3</sub>N (34.8 mL, 250 mmol, 2.5 equiv) in THF:H<sub>2</sub>O (1:9, 200 mL) at 0 °C was added a solution of 2-nitrobenzenesulfonyl chloride (24.4 g, 110 mmol, 1.10 equiv) in THF (100 mL). The



mixture was warmed to rt and stirred 30 min, at which time TLC analysis showed complete consumption of starting material. The THF was removed *via* rotary evaporation, and the resulting aqueous solution was washed with Et<sub>2</sub>O (75 mL). To the aqueous layer, aqueous HCl (2 M) was added until the solution registered pH 1. The mixture was extracted with EtOAc (3 X 100 mL), and the combined organics were washed with brine (75 mL), dried (MgSO<sub>4</sub>), and concentrated *via* rotary evaporation to give **SI-05** (34.2 g, 88%) as a yellow-brown foam which was carried forward without further purification:

$[\alpha]_{\text{D}}^{24.2} = 10.3$  ( $c = 1.0$ , MeOH);

**<sup>1</sup>H NMR (600 MHz, CD<sub>3</sub>OD):**  $\delta$  7.57 (dd,  $J = 16.9, 7.9$  Hz, 2H), 7.50 – 7.46 (m, 1H), 7.41 (d,  $J = 7.9$  Hz, 1H), 7.29 (t,  $J = 7.7$  Hz, 1H), 7.17 (d,  $J = 8.1$  Hz, 1H), 7.05 – 7.01 (m, 2H), 6.91 (t,  $J = 7.5$  Hz, 1H), 4.31 (dd,  $J = 9.6, 4.2$  Hz, 1H), 3.35 – 3.32 (m, 1H), 3.08 (dd,  $J = 14.6, 9.5$  Hz, 1H).

**<sup>13</sup>C NMR (151 MHz, CD<sub>3</sub>OD):**  $\delta$  175.5, 148.2, 137.9, 134.5, 134.3, 133.2, 130.7, 128.2, 125.7, 125.3, 122.2, 119.8, 119.2, 112.4, 110.1, 58.9, 29.8.

**HRMS:** Calc'd for C<sub>17</sub>H<sub>16</sub>N<sub>3</sub>O<sub>6</sub>S, [M+H]<sup>+</sup>, 390.0754; found, 390.0751.

$R_f = 0.50$  (Hex:Acetone:AcOH = 50:50:1; UV, Ce<sub>2</sub>(SO<sub>4</sub>)<sub>3</sub> in phosphomolybdic acid)

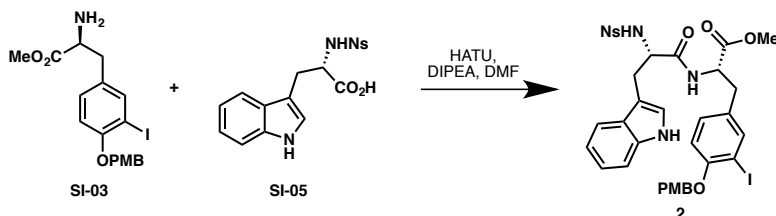

## Compound 2

To a solution of **SI-05** (34.2 g, 88.0 mmol, 1.1 equiv) and **SI-03** (37.0 g, 81.1 mmol, 1 equiv) in DMF (200 mL) at 0 °C was added HATU (33.4 g, 88.0 mmol, 1.1 equiv), followed by DIPEA (46.3 mL, 264 mmol, 3.3 equiv). The mixture was stirred for 10 min at 0 °C, then allowed to warm to rt and stirred an additional 30 min. The mixture was diluted with EtOAc (1.0 L) and washed sequentially with aqueous HCl (1 M, 4 X 200 mL), aqueous NaHCO<sub>3</sub> (saturated, 100 mL), and brine (100 mL). The organic layer was dried (MgSO<sub>4</sub>) and concentrated *via* rotary evaporation to yield **2** (59.8 g, 91%) as a yellow foam which was carried forward without further purification.

$[\alpha]_{\text{D}}^{20} = 17.2$  ( $c = 1.0$ , CHCl<sub>3</sub>);

**<sup>1</sup>H NMR (600 MHz, CDCl<sub>3</sub>):**  $\delta$  7.99 (s, 1H), 7.85 – 7.82 (m, 1H), 7.47 (d,  $J = 2.1$  Hz, 1H), 7.47 – 7.44 (m, 1H), 7.42 – 7.38 (m, 4H), 7.19 – 7.14 (m, 2H), 7.05 – 7.02 (m, 3H), 6.94 – 6.89 (m, 3H), 6.81 (ddd,  $J = 7.9, 7.0, 1.0$  Hz, 1H), 6.74 (d,  $J = 8.4$  Hz, 1H), 5.94 (d,  $J = 4.4$  Hz, 1H), 5.04 (s, 2H), 4.84 – 4.80 (m, 1H), 4.10 (dt,  $J = 9.5, 4.6$  Hz, 1H), 3.79 (s,

3H), 3.74 (s, 3H), 3.35 (ddd,  $J = 14.9, 4.8, 1.0$  Hz, 1H), 3.05 (dd,  $J = 14.1, 5.6$  Hz, 1H), 2.97 – 2.87 (m, 2H).

$^{13}\text{C}$  NMR (151 MHz,  $\text{CDCl}_3$ ):  $\delta$  171.2, 170.4, 159.5, 156.6, 146.4, 140.4, 136.5, 133.7, 132.8, 131.8, 131.0, 130.4, 128.9, 128.6, 126.3, 125.7, 124.6, 122.4, 120.0, 118.5, 114.1, 113.0, 111.4, 109.0, 86.9, 70.9, 58.0, 55.4, 53.4, 52.7, 36.5, 29.1.

HRMS: Calc'd for  $\text{C}_{35}\text{H}_{34}\text{IN}_4\text{O}_9\text{S}$ ,  $[\text{M}+\text{H}]^+$ , 813.1086; found, 813.1078.

$R_f = 0.57$  (Hex:EtOAc = 1:2; UV,  $\text{Ce}_2(\text{SO}_4)_3$  in phosphomolybdic acid)

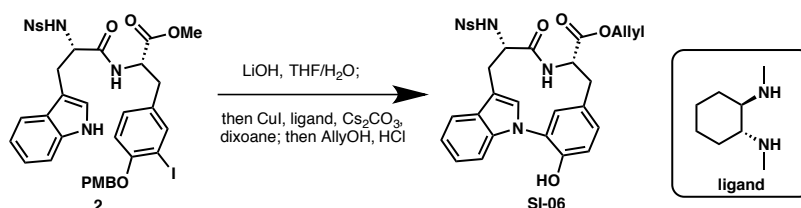

### SI-06

To a solution of **2** (32.5 g, 40.0 mmol, 1 equiv) in THF/H<sub>2</sub>O (1:1, 200 mL) was added LiOH·H<sub>2</sub>O (3.36 g, 80.0 mmol, 2.00 equiv). The mixture was stirred at rt for 6 h, and then the THF was removed *via* rotary evaporation. The resulting aqueous solution was washed with Et<sub>2</sub>O (75 mL), then acidified to pH 1 *via* addition of aqueous HCl (2 M). The mixture was extracted with EtOAc (3 X 100 mL) dried (MgSO<sub>4</sub>), and concentrated *via* rotary evaporation to give a yellow residue, which was directly used for next step without further purification.

The yellow residue and K<sub>2</sub>CO<sub>3</sub> (27.6 g, 200 mmol, 5.00 equiv) were dissolved in 1,4-dioxane (1.0 L) and the resulting slurry was degassed with argon for 60 minutes. The septum was quickly removed, CuI<sup>31</sup> (2.28 g, 12.0 mmol, 30.0 mol%) was added, and the septum was quickly replaced. The flask was evacuated and backfilled with argon four times. Ligand *rac-trans-N,N'*-dimethylcyclohexane-1,2-diamine (2.8 mL, 18 mmol, 45 mol%) was added in one portion. The resultant blue-green mixture was heated to 100 °C for 24 h, at which time LC/MS analysis showed complete consumption of starting material. The mixture was cooled to rt, diluted with Et<sub>2</sub>O (1.0 L), and extracted with aqueous NH<sub>4</sub>OH (1 M, 4 X 300 mL). To the combined aqueous extractions was slowly added aqueous HCl (3 M) until the mixture registered pH 1. The solution was extracted with EtOAc (4 X 300 mL) and the combined organics were washed with brine (100 mL), dried (MgSO<sub>4</sub>), and concentrated *via* rotary evaporation to give a brown foam which was carried forward without further purification.

To allyl alcohol (100 mL) at 0 °C was added AcCl (7.1 mL, 100 mmol, 2.5 equiv) dropwise. To the resultant solution was added the above paragraph's crude brown foam. The mixture was heated to 65 °C for 3 h, at which time LC/MS showed complete

<sup>31</sup> Commercial CuI was purified *via* Soxhlet washing with refluxing THF for 24 h, then stored in an Argon-filled glovebox.

conversion. The mixture was concentrated *via* rotary evaporation, and the resultant residue purified by column chromatography (SiO<sub>2</sub>, 0 to 5% acetone/DCM) to yield **SI-06** (14.4 g, 61% overall) as a yellow foam:

$[\alpha]_D^{20} = 171.2$  ( $c = 1.0$ , CHCl<sub>3</sub>);

**<sup>1</sup>H NMR (600 MHz, CDCl<sub>3</sub>):**  $\delta$  8.16 (dd,  $J = 7.7, 1.7$  Hz, 1H), 7.93 (dd,  $J = 7.8, 1.5$  Hz, 1H), 7.84 – 7.75 (m, 3H), 7.43 – 7.38 (m, 2H), 7.33 (t,  $J = 7.6$  Hz, 1H), 7.12 (d,  $J = 10.3$  Hz, 1H), 6.93 (s, 2H), 6.52 (s, 1H), 6.18 (s, 1H), 5.83 (dt,  $J = 16.9, 5.2$  Hz, 2H), 5.66 (d,  $J = 7.8$  Hz, 1H), 5.29 – 5.21 (m, 2H), 4.48 (t,  $J = 5.6$  Hz, 2H), 4.44 – 4.35 (m, 2H), 3.57 (dd,  $J = 14.6, 4.1$  Hz, 1H), 3.02 (dd,  $J = 14.6, 3.4$  Hz, 1H), 2.75 (dd,  $J = 14.5, 2.0$  Hz, 1H), 2.43 (dd,  $J = 14.5, 11.7$  Hz, 1H).

**<sup>13</sup>C NMR (151 MHz, CDCl<sub>3</sub>):**  $\delta$  170.4, 168.7, 150.4, 149.9, 148.2, 147.4, 134.8, 134.6, 133.2, 132.5, 131.7, 131.5, 129.6, 129.1, 128.4, 127.6, 126.1, 125.5, 124.6, 119.3, 119.2, 117.4, 116.7, 116.6, 66.2, 60.8, 54.5, 35.8, 27.5.

**HRMS:** Calc'd for C<sub>29</sub>H<sub>27</sub>N<sub>4</sub>O<sub>8</sub>S, [M+H]<sup>+</sup>, 591.1544; found, 591.1536.

**R<sub>f</sub>** = 0.37 (Hex:EtOAc = 1:1; UV, Ce<sub>2</sub>(SO<sub>4</sub>)<sub>3</sub> in phosphomolybdic acid)

**Table S1, optimization of Ullman cyclization**

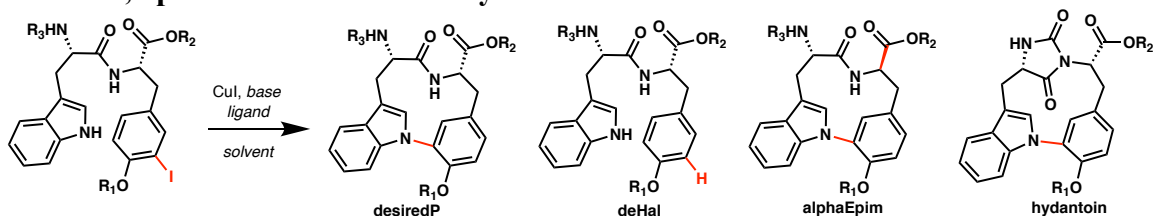

Ligands screened:

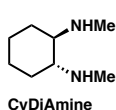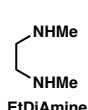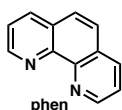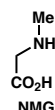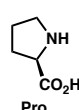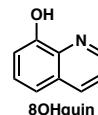

**Standard conditions:** ligand = **CyDiAmine**; base =  $K_2CO_3$ ; solvent = dioxane;  $R_1$  = PMB;  $R_2$  = H;  $R_3$  = Ns; concentration = 40 mM

| Entry                      | Difference from standard conditions | Yield desiredP (%) | Major side product |
|----------------------------|-------------------------------------|--------------------|--------------------|
| <i>standard conditions</i> | -                                   | 66                 | -                  |
| 1                          | $R_1$ = Piv                         | -                  | deHal              |
| 2                          | $R_1$ = H                           | -                  | deHal              |
| 3                          | $R_2$ = Me                          | 30                 | alphaEpim          |
| 4                          | $R_3$ = Cbz                         | -                  | hydantoin          |
| 5                          | $R_3$ = Boc                         | -                  | hydantoin          |
| 6                          | ligand = EtDiAmine                  | 54                 | -                  |
| 7                          | ligand = phen                       | 21                 | deHal              |
| 8                          | ligand = NMG                        | 29                 | deHal              |
| 9                          | ligand = Pro                        | 28                 | deHal              |
| 10                         | ligand = 8OHquin                    | -                  | deHal              |
| 11                         | base = $CS_2CO_3$                   | 66                 | -                  |
| 12                         | base = $K_3PO_4$                    | 49                 | deHal              |
| 13                         | base = Barton's base (guanadine)    | -                  | recovered SM       |
| 14                         | base = $Et_3N$                      | -                  | recovered SM       |
| 15                         | solvent = toluene                   | -                  | recovered SM       |
| 16                         | solvent = DMF                       | 44                 | deHal              |
| 17                         | solvent = DMSO                      | 31                 | deHal              |
| 18                         | concentration = 10 mM               | 69                 | -                  |
| 19                         | concentration = 1 mM                | 68                 | -                  |
| 20                         | concentration = 100 mM              | 44                 | oligimers          |
| 21                         | additive = NaI, 10 equiv            | -                  | recovered SM       |
| 22                         | additive = TBAI, 10 equiv           | -                  | recovered SM       |

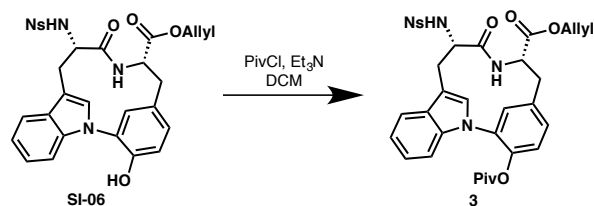

### Compound 3

To a solution of **SI-06** (16.8 g, 28.5 mmol, 1 equiv) and Et<sub>3</sub>N (11.9 mL, 85.5 mmol, 3.00 equiv) in DCM (100 mL) at rt was added pivaloyl chloride (4.2 mL, 34 mmol, 1.2 equiv) dropwise. After complete addition, the mixture was stirred for 1 h at rt. The resultant solution was poured over aqueous HCl (1 M, 200 mL) and the aqueous layer extracted with additional DCM (3 X 100 mL). The combined organics were dried (MgSO<sub>4</sub>) and concentrated *via* rotary evaporation to yield the title product as a yellow foam (19.0 g, 99%), which was carried forward without further purification:

$[\alpha]_D^{24.1} = 107.8$  ( $c = 0.8$ , CHCl<sub>3</sub>);

**<sup>1</sup>H NMR (600 MHz, CDCl<sub>3</sub>):** δ 8.17 (dd,  $J = 7.6, 1.7$  Hz, 1H), 7.93 (dd,  $J = 7.8, 1.5$  Hz, 1H), 7.82 (td,  $J = 7.7, 1.7$  Hz, 1H), 7.79 (td,  $J = 7.6, 1.5$  Hz, 1H), 7.74 (d,  $J = 7.7$  Hz, 1H), 7.54 (d,  $J = 8.0$  Hz, 1H), 7.38 (td,  $J = 7.5, 1.1$  Hz, 1H), 7.31 (ddd,  $J = 8.3, 7.2, 1.2$  Hz, 1H), 7.11 (d,  $J = 10.3$  Hz, 1H), 7.06 (dd,  $J = 8.3, 2.1$  Hz, 1H), 7.03 (d,  $J = 8.3$  Hz, 1H), 6.54 (s, 1H), 5.95 (d,  $J = 2.1$  Hz, 1H), 5.84 (ddt,  $J = 17.2, 10.4, 5.9$  Hz, 1H), 5.71 (d,  $J = 8.4$  Hz, 1H), 5.30 – 5.20 (m, 2H), 4.54 – 4.45 (m, 2H), 4.45 – 4.35 (m, 2H), 3.56 (dd,  $J = 14.6, 4.2$  Hz, 1H), 3.01 (dd,  $J = 14.5, 3.3$  Hz, 1H), 2.84 (dd,  $J = 14.4, 2.0$  Hz, 1H), 2.51 (dd,  $J = 14.4, 11.8$  Hz, 1H), 1.33 (s, 9H).

**<sup>13</sup>C NMR (151 MHz, CDCl<sub>3</sub>):** δ 177.3, 170.3, 168.9, 149.9, 148.2, 146.7, 144.8, 135.8, 135.2, 134.6, 134.2, 133.2, 132.5, 131.8, 131.5, 129.4, 128.6, 126.1, 125.2, 124.2, 123.1, 119.3, 118.8, 117.0, 116.2, 66.3, 61.0, 54.2, 39.3, 35.9, 27.5, 27.3.

**HRMS:** Calc'd for C<sub>34</sub>H<sub>35</sub>N<sub>4</sub>O<sub>9</sub>S, [M+H]<sup>+</sup>, 675.2119; found, 675.2118.

$R_f = 0.18$  (Hex:EtOAc = 2:1; UV, Ce<sub>2</sub>(SO<sub>4</sub>)<sub>3</sub> in phosphomolybdic acid)

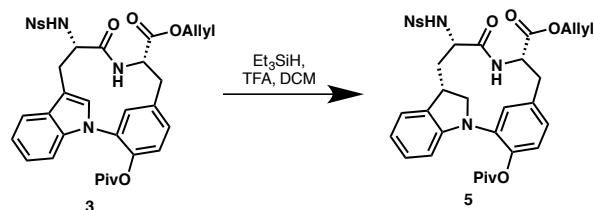

### Compound 5

To a solution of **3** (19.0 g, 28.2 mmol) in DCM (100 mL) at rt was added TFA (25 mL) followed by Et<sub>3</sub>SiH (25 mL). The mixture was stirred at rt for 5 min, then concentrated

via rotary evaporation, and the residue purified via column chromatography (SiO<sub>2</sub>, 0-50% EtOAc/hexane) to yield **5** (16.2 g, 85%) as a yellow foam:

$[\alpha]_D^{20} = -60.2$  ( $c = 1.0$ , CHCl<sub>3</sub>);

<sup>1</sup>H NMR (600 MHz, CDCl<sub>3</sub>): δ 8.02 (dd,  $J = 7.6, 1.5$  Hz, 1H), 7.82 (d,  $J = 7.8$  Hz, 1H), 7.75 – 7.66 (m, 2H), 7.37 (s, 1H), 7.23 (s, 1H), 7.03 (d,  $J = 8.1$  Hz, 2H), 6.96 (dd,  $J = 8.1, 1.9$  Hz, 1H), 6.92 (d,  $J = 8.1$  Hz, 2H), 5.81 (ddt,  $J = 16.5, 10.4, 5.8$  Hz, 1H), 5.29 – 5.23 (m, 2H), 4.44 (qdt,  $J = 13.1, 5.9, 1.4$  Hz, 2H), 4.09 (ddd,  $J = 11.8, 9.5, 2.3$  Hz, 1H), 3.57 (s, 1H), 3.33 (dd,  $J = 11.9, 2.8$  Hz, 1H), 2.99 (dd,  $J = 13.2, 2.4$  Hz, 1H), 2.54 (s, 1H), 2.46 – 2.35 (m, 2H), 1.32 (s, 9H).

<sup>13</sup>C NMR (151 MHz, CDCl<sub>3</sub>): δ 176.8, 170.3, 168.5, 150.2, 148.1, 144.2, 134.9, 134.1, 132.8, 132.5, 131.5, 131.3, 129.3, 125.8, 123.9, 122.1, 119.3, 116.6, 66.1, 57.5, 54.4, 39.5, 39.1, 27.3.

HRMS: Calc'd for C<sub>34</sub>H<sub>37</sub>N<sub>4</sub>O<sub>9</sub>S, [M+H]<sup>+</sup>, 677.2276; found, 677.2278.

$R_f = 0.33$  (Hex:EtOAc = 2:1; UV, Ce<sub>2</sub>(SO<sub>4</sub>)<sub>3</sub> in phosphomolybdic acid)

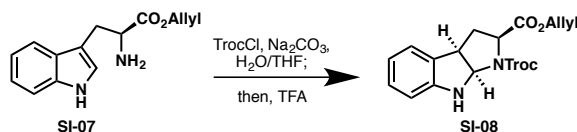

### SI-08

To a solution of *L*-tryptophan allyl ester (**SI-07**) (19.5 g, 80 mmol, 1 equiv) in THF/H<sub>2</sub>O (1:1, 400 mL) was added Na<sub>2</sub>CO<sub>3</sub> (12.7 g, 120 mmol, 1.50 equiv). The mixture was stirred at rt for 10 min, then 2,2,2-trichloroethylchloroformate (12.1 mL, 88 mmol, 1.10 equiv) was added dropwise. The mixture was stirred at rt for 30 min, then concentrated via rotary evaporation to remove THF. The resultant slurry was extracted with DCM (3 X 200 mL), and the combined organics dried (MgSO<sub>4</sub>) and concentrated via rotary evaporation to yield the carbamate as a yellow foam.

The crude carbamate was dissolved in TFA (200 mL) and stirred at rt for 12 h. At this time, a separate two-necked round-bottom flask fitted with a mechanical stirrer was charged with Na<sub>2</sub>CO<sub>3</sub> (310 g), H<sub>2</sub>O (600 mL), and DCM (200 mL). While stirring vigorously, the homogeneous TFA solution was slowly (over *ca.* 20 min) poured into to this slurry. The resultant mixture was filtered through a fritted glass funnel, and the filter cake was washed with DCM (3 X 100 mL). The biphasic filtrate's layers were separated, and the aqueous layer extracted with additional DCM (3 X 200 mL). The combined organics were washed with brine (200 mL), dried (MgSO<sub>4</sub>), and concentrated via rotary evaporation, and the residue purified by column chromatography (SiO<sub>2</sub>, 0-20% acetone/hexane) to yield **SI-08** as a yellow foam (22.5 g, 67%).

Note: Due to propensity of this compound to tautomerize to its open-chain form, it was used immediately in the next step.

$[\alpha]_D^{24.4} = 139.1$  ( $c = 1.0$ ,  $\text{CHCl}_3$ );

**The NMR spectra presented as a mixture of rotamers:**

**$^1\text{H}$  NMR (600 MHz,  $\text{CDCl}_3$ ):**  $\delta$  7.07 – 7.02 (m, 4H), 6.70 (qd,  $J = 7.5, 1.0$  Hz, 2H), 6.59 (dd,  $J = 7.6, 0.9$  Hz, 2H), 5.68 (d,  $J = 6.6$  Hz, 1H), 5.64 (d,  $J = 6.7$  Hz, 1H), 5.52 (dddt,  $J = 16.8, 10.7, 8.4, 5.9$  Hz, 2H), 5.16 (s, 1H), 5.11 (ddq,  $J = 17.4, 10.5, 1.3$  Hz, 4H), 5.02 – 4.98 (m, 2H), 4.75 (dd,  $J = 21.8, 11.9$  Hz, 2H), 4.66 – 4.63 (m, 3H), 4.17 (dddt,  $J = 19.0, 13.1, 6.0, 1.3$  Hz, 2H), 4.02 – 3.88 (m, 4H), 2.74 – 2.62 (m, 4H).

**$^{13}\text{C}$  NMR (151 MHz,  $\text{CDCl}_3$ ):**  $\delta$  170.7 (170.4), 153.0 (152.4), 149.9 (149.6), 131.8, 128.94 (128.88), 127.5 (127.3), 124.4 (124.2), 119.2 (119.1), 118.58 (118.55), 109.4 (109.2), 95.6 (95.1), 77.8 (77.3), 75.1 (75.0), 66.2 (66.1), 59.8 (59.4), 46.3 (45.3), 34.7 (33.9).

**HRMS:** Calc'd for  $\text{C}_{17}\text{H}_{18}\text{Cl}_3\text{N}_2\text{O}_4$ ,  $[\text{M}+\text{H}]^+$ , 419.0327; found, 419.0324.

$R_f = 0.80$  (Hex/EtOAc = 2:1; UV,  $\text{Ce}_2(\text{SO}_4)_3$  in phosphomolybdic acid)

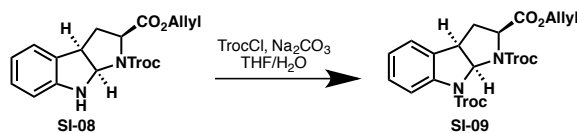

### SI-09

To a solution of **SI-08** (22.5 g, 53.6 mmol, 1 equiv) in THF (150 mL) was added  $\text{Na}_2\text{CO}_3$  (8.52 g, 80.4 mmol, 1.50 equiv), then  $\text{H}_2\text{O}$  (150 mL). To the resultant mixture was added 2,2,2-trichloroethylchloroformate (8.1 mL, 59.0 mmol, 1.1 equiv) dropwise, and the solution was stirred for 4 h at rt. The mixture was concentrated *via* rotary evaporation to remove THF, and resultant aqueous suspension was extracted with EtOAc (3 X 150 mL). The combined organics were dried ( $\text{MgSO}_4$ ) and concentrated *via* rotary evaporation, and the residue purified by column chromatography ( $\text{SiO}_2$ , 0 – 20% acetone/hexane) to yield **SI-09** as a yellow foam (30.0 g, 94%):

$[\alpha]_D^{20} = -1.0$  ( $c = 1.0$ ,  $\text{CHCl}_3$ );

**$^1\text{H}$  NMR (600 MHz,  $\text{CDCl}_3$ ):**  $\delta$  7.69 (s, 1H), 7.27 – 7.24 (m, 1H), 7.18 – 7.15 (m, 1H), 7.09 – 7.04 (m, 1H), 6.59 (d,  $J = 6.5$  Hz, 1H), 5.53 (ddt,  $J = 16.5, 10.5, 5.8$  Hz, 1H), 5.15 – 5.09 (m, 2H), 4.82 (s, 2H), 4.74 (dd,  $J = 9.0, 1.1$  Hz, 1H), 4.62 (t,  $J = 18.4$  Hz, 1H), 4.18 – 4.11 (m, 2H), 3.88 (ddt,  $J = 13.1, 5.7, 1.5$  Hz, 1H), 2.74 (d,  $J = 13.2$  Hz, 1H), 2.72 – 2.60 (m, 1H).

$^{13}\text{C}$  NMR (151 MHz,  $\text{CDCl}_3$ ):  $\delta$  170.4, 152.1, 151.8, 141.8, 131.4, 131.3, 129.1, 124.4, 124.3, 118.6, 95.2, 77.7, 75.7, 75.3, 66.2, 59.6, 44.7, 34.1.

HRMS: Calc'd for  $\text{C}_{20}\text{H}_{19}\text{Cl}_6\text{N}_2\text{O}_6$ ,  $[\text{M}+\text{H}]^+$ , 592.9369; found, 592.9362.

$R_f$  = 0.80 (Hex:EtOAc = 2:1; UV,  $\text{Ce}_2(\text{SO}_4)_3$  in phosphomolybdic acid)

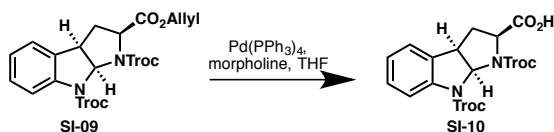

### SI-10

A solution of **SI-09** (30.0 g, 50.4 mmol, 1 equiv) and morpholine (26.0 mL, 302 mmol, 6 equiv) in THF (250 mL) was sparged with argon for 30 min; then, was added  $\text{Pd}(\text{PPh}_3)_4$  (582 mg, 0.504 mmol, 1.00 mol%) in a single portion. The solution was stirred for 15 min at rt, at which time TLC analysis showed complete consumption of starting material. The mixture was poured over aqueous HCl (1 M, 500 mL) and extracted with EtOAc (3 X 250 mL). The combined organics were dried ( $\text{MgSO}_4$ ) and concentrated *via* rotary evaporation, and the residue purified by column chromatography ( $\text{SiO}_2$ , 0-67% EtOAc/hexane with 0.67% AcOH) to yield **SI-10** as a yellow foam (28.0 g, quant.):

$[\alpha]_D^{20} = 17.1$  ( $c = 1.0$ ,  $\text{CHCl}_3$ );

$^1\text{H}$  NMR (600 MHz,  $\text{CDCl}_3$ ):  $\delta$  7.65 (s, 1H), 7.25 – 7.20 (m, 1H), 7.13 (dd,  $J = 7.6, 1.4$  Hz, 1H), 6.99 (td,  $J = 7.5, 1.0$  Hz, 1H), 6.55 (d,  $J = 6.6$  Hz, 1H), 5.02 (s, 1H), 4.83 (d,  $J = 11.7$  Hz, 2H), 4.67 (dd,  $J = 9.2, 1.4$  Hz, 1H), 4.57 (s, 1H), 4.10 (t,  $J = 6.9$  Hz, 1H), 2.73 – 2.66 (m, 1H), 2.63 (dt,  $J = 13.4, 1.6$  Hz, 1H).

$^{13}\text{C}$  NMR (151 MHz,  $\text{CDCl}_3$ ):  $\delta$  175.6, 151.8, 141.7, 131.1, 129.2, 124.4, 124.1, 117.5, 95.2, 77.8, 75.7, 75.4, 59.3, 44.7, 33.9.

HRMS: Calc'd for  $\text{C}_{17}\text{H}_{15}\text{Cl}_6\text{N}_2\text{O}_6$ ,  $[\text{M}+\text{H}]^+$ , 552.9056; found, 552.9049.

$R_f$  = 0.45 (Hex:EtOAc:AcOH = 50:50:1; UV,  $\text{Ce}_2(\text{SO}_4)_3$  in phosphomolybdic acid)

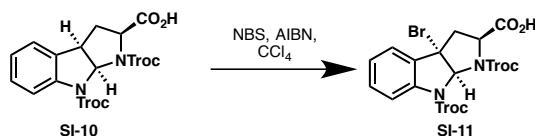

### SI-11

A solution of **SI-10** (2.22 g, 4.0 mmol, 1 equiv) in  $\text{CCl}_4$  (80 mL) was degassed *via* argon sparging for 45 min. The septum was removed, NBS (1.42 g, 8.0 mmol, 2.00 equiv) and AIBN (657 mg, 4.0 mmol, 1.00 equiv) were added, and the septum quickly replaced. The resultant mixture was heated to reflux for 1 h, at which time LC/MS analysis showed



complete consumption of the starting material. The mixture was concentrated *via* rotary evaporation, and the residue purified by column chromatography (SiO<sub>2</sub>, 0-50% EtOAc/hexane) to yield **SI-11** as a yellow foam (1.70 g, 67%):

$[\alpha]_D^{25.2} = 55.0$  ( $c = 1.0$ , CHCl<sub>3</sub>);

**<sup>1</sup>H NMR (600 MHz, CDCl<sub>3</sub>):** δ 7.65 (s, 1H), 7.36 – 7.31 (m, 2H), 7.10 (td,  $J = 7.6, 1.0$  Hz, 1H), 6.58 (s, 1H), 4.83 (s, 2H), 4.67 – 4.62 (m, 1H), 4.58 (s, 1H), 3.32 (d,  $J = 13.4$  Hz, 1H), 3.22 (s, 1H).

**<sup>13</sup>C NMR (151 MHz, CDCl<sub>3</sub>):** δ 174.0, 151.7, 141.0, 132.2, 131.5, 125.3, 124.0, 118.4, 94.9, 85.1, 75.8, 75.5, 59.7, 58.9, 43.7.

**HRMS:** Calc'd for C<sub>17</sub>H<sub>14</sub>BrCl<sub>6</sub>N<sub>2</sub>O<sub>6</sub>, [M+H]<sup>+</sup>, 630.8161; found, 630.8159.

$R_f = 0.45$  (Hex:EtOAc:AcOH = 50:50:1; UV, Ce<sub>2</sub>(SO<sub>4</sub>)<sub>3</sub> in phosphomolybdic acid)

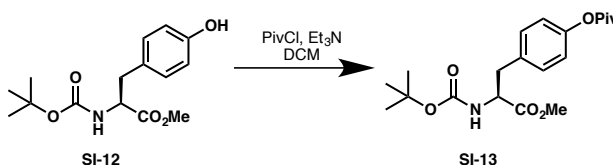

### SI-13

To a solution of Boc-Tyr-OMe (**SI-12**) (3.00 g, 10.0 mmol, 1 equiv) and triethylamine (4.2 mL, 30 mmol, 3.0 equiv) in DCM (50 mL) was added pivaloyl chloride (1.85 mL, 15.0 mmol, 1.5 equiv) dropwise at rt. After complete addition, the mixture was stirred for 1 h at rt. The resultant solution was poured over aqueous HCl (1 M, 100 mL) and the aqueous layer extracted with additional DCM (3 X 50 mL). The combined organics were dried (MgSO<sub>4</sub>) and concentrated *via* rotary evaporation, and the residue was purified by column chromatography (SiO<sub>2</sub>, 0-30% EtOAc/hexane) to yield **SI-13** as a colorless oil (3.70 g, 98%).

$[\alpha]_D^{22.6} = 28.9$  ( $c = 1.0$ , CHCl<sub>3</sub>);

**<sup>1</sup>H NMR (600 MHz, CDCl<sub>3</sub>):** δ 7.12 (d,  $J = 8.1$  Hz, 2H), 7.00 – 6.97 (m, 2H), 4.99 (d,  $J = 8.3$  Hz, 1H), 4.56 (q,  $J = 6.8$  Hz, 1H), 3.70 (s, 3H), 3.07 (qd,  $J = 14.0, 6.0$  Hz, 2H), 1.42 (s, 9H), 1.34 (s, 9H).

**<sup>13</sup>C NMR (151 MHz, CDCl<sub>3</sub>):** δ 177.1, 172.3, 155.2, 150.3, 133.5, 130.3, 121.7, 80.1, 54.5, 52.4, 39.2, 37.8, 28.4, 27.2.

**HRMS:** Calc'd for C<sub>20</sub>H<sub>29</sub>NNaO<sub>6</sub>, [M+Na]<sup>+</sup>, 402.1887; found, 402.1888.

$R_f = 0.83$  (Hex/EtOAc = 2:1; UV, Ce<sub>2</sub>(SO<sub>4</sub>)<sub>3</sub> in phosphomolybdic acid)

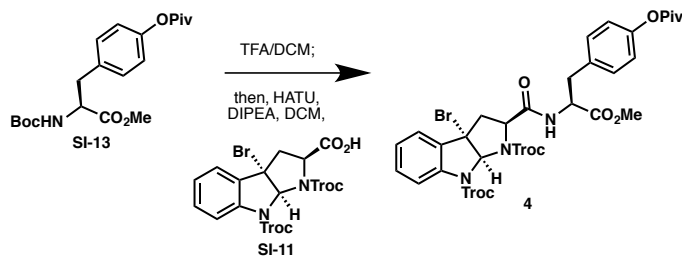

### Compound 4

To solution of **SI-13** (1.26 g, 3.32 mmol, 1.10 equiv) in DCM (10 mL) was added TFA (2.5 mL). The resultant mixture was stirred at rt for 1 h, then diluted with toluene (10 mL) and concentrated *via* rotary evaporation. The residue was co-evaporated with additional toluene (2 X 10 mL) to remove residual TFA. The resultant oil was dissolved in DCM (15 mL), and then **SI-11** (1.40 g, 2.21 mmol, 1 equiv) and DIPEA (1.9 mL, 11.1 mmol, 5 equiv) were sequentially added. Then, HATU (1.01 g, 2.65 mmol, 1.20 equiv) was added, and the mixture stirred at rt for 1 h. The reaction mixture was quenched with saturated aqueous  $\text{NH}_4\text{Cl}$  solution (50 mL) and extracted with DCM (3 X 50 mL). The organic layer was dried ( $\text{MgSO}_4$ ) and concentrated, and the residue purified by column chromatography ( $\text{SiO}_2$ , 0-50% EtOAc/hexane) to yield **4** as a yellow foam (1.40 g, 71%):

$[\alpha]_{\text{D}}^{20} = 37.5$  ( $c = 1.0$ ,  $\text{CHCl}_3$ );

$^1\text{H NMR}$  (600 MHz,  $\text{CDCl}_3$ ):  $\delta$  7.74 (d,  $J = 8.2$  Hz, 1H), 7.48 (d,  $J = 7.7$  Hz, 1H), 7.36 (td,  $J = 7.8, 1.3$  Hz, 1H), 7.19 (td,  $J = 7.6, 1.0$  Hz, 1H), 6.93 – 6.87 (m, 4H), 6.70 (s, 1H), 5.14 (d,  $J = 11.9$  Hz, 1H), 4.88 (d,  $J = 11.9$  Hz, 2H), 4.66 (dd,  $J = 9.5, 1.4$  Hz, 1H), 4.28 (s, 1H), 3.67 – 3.59 (m, 1H), 3.52 (s, 3H), 3.11 (dd,  $J = 13.5, 9.5$  Hz, 1H), 2.60 (dd,  $J = 13.7, 4.7$  Hz, 1H), 2.21 (dd,  $J = 13.7, 7.7$  Hz, 1H), 1.34 (s, 9H).

$^{13}\text{C NMR}$  (151 MHz,  $\text{CDCl}_3$ ):  $\delta$  177.0, 171.1, 168.1, 151.7, 150.3, 140.0, 132.9, 132.6, 131.2, 123.0, 125.8, 125.5, 121.7, 118.0, 94.8, 94.7, 86.2, 75.9, 75.6, 61.9, 60.0, 53.1, 52.3, 42.5, 39.1, 37.6, 27.2.

**HRMS**: Calc'd for  $\text{C}_{32}\text{H}_{33}\text{BrCl}_6\text{N}_3\text{O}_9$ ,  $[\text{M}+\text{H}]^+$ , 891.9526; found, 891.9572.

$R_f = 0.50$  (Hex:EtOAc = 2:1; UV,  $\text{Ce}_2(\text{SO}_4)_3$  in phosphomolybdic acid)

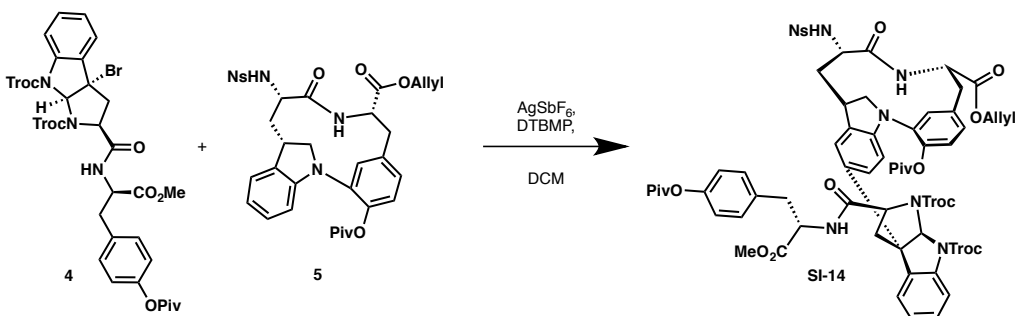

**SI-14**

Macrocycle **5** (2.00 g, 2.95 mmol, 1 equiv), alkyl bromide **4** (3.96 g, 4.43 mmol, 1.50 equiv), and 2,6-di-*t*-butyl-4-methylpyridine (3.02 g, 14.8 mmol, 5.00 equiv) were combined and azeotroped from benzene three times (3 X 50 mL). After the final azeotrope, the mixture was held under vacuum (<1 torr) for 13 h. The flask was backfilled with argon, and DCM (60 mL) was added. The septum was quickly removed, AgSbF<sub>6</sub> (5.05 g, 14.8 mmol, 5.00 equiv) was added as a solid in a single portion, and the septum quickly replaced. The resultant brown slurry was stirred for 1 h at rt, then filtered over a pad of Celite, washing with large amounts of DCM (*ca.* 5 X 100 mL). The filtrate was concentrated *via* rotary evaporation, and the residue purified *via* column chromatography (SiO<sub>2</sub>, 0-7% acetone/DCM) to yield **SI-14** (2.42 g, 55%) as a pale-yellow foam:

$[\alpha]_D^{20} = -37.7$  ( $c = 1.0$ , CHCl<sub>3</sub>);

**<sup>1</sup>H NMR (600 MHz, CDCl<sub>3</sub>):**  $\delta$  7.98 (dd,  $J = 7.8, 1.4$  Hz, 1H), 7.83 (dd,  $J = 7.9, 1.3$  Hz, 1H), 7.79 (d,  $J = 7.7$  Hz, 1H), 7.74 (t,  $J = 7.7$  Hz, 1H), 7.67 (td,  $J = 7.7, 1.3$  Hz, 1H), 7.49 (d,  $J = 39.6$  Hz, 2H), 7.29 (t,  $J = 7.8$  Hz, 1H), 7.24 – 7.12 (m, 1H), 7.05 – 6.84 (m, 6H), 5.27 – 5.22 (m, 2H), 4.90 – 4.78 (m, 3H), 4.39 (s, 2H), 4.23 (m, 2H), 4.05 (ddd,  $J = 12.0, 9.8, 2.4$  Hz, 1H), 3.52 (s, 3H), 3.41 (d,  $J = 13.5$  Hz, 1H), 3.32 (dd,  $J = 11.8, 3.0$  Hz, 1H), 3.10 (s, 1H), 2.97 (d,  $J = 12.8$  Hz, 1H), 2.66 (dd,  $J = 13.7, 4.6$  Hz, 1H), 2.56 (d,  $J = 38.4$  Hz, 2H), 2.40 – 2.27 (m, 2H), 1.34 (s, 9H), 1.30 (s, 9H).

**<sup>13</sup>C NMR (151 MHz, CDCl<sub>3</sub>):**  $\delta$  177.1, 176.5, 171.4, 170.2, 169.8, 167.9, 151.7, 150.3, 148.9, 148.2, 143.5, 140.2, 135.6, 135.1, 134.6, 134.4, 133.2, 132.9, 132.6, 131.3, 131.1, 130.1, 129.2, 128.1, 125.9, 125.5, 125.4, 124.2, 122.5, 121.7, 119.4, 117.5, 117.1, 95.3, 95.1, 83.9, 75.4, 66.1, 62.5, 57.3, 54.5, 53.3, 52.2, 39.5, 39.2, 39.1, 37.8, 27.4, 27.3.

**HRMS:** Calc'd for C<sub>66</sub>H<sub>68</sub>Cl<sub>6</sub>N<sub>7</sub>O<sub>18</sub>S, [M+H]<sup>+</sup>, 1488.2467; found, 1488.2482.

$R_f = 0.68$  (Hex/EtOAc = 2:3; UV, Ce<sub>2</sub>(SO<sub>4</sub>)<sub>3</sub> in phosphomolybdic acid)

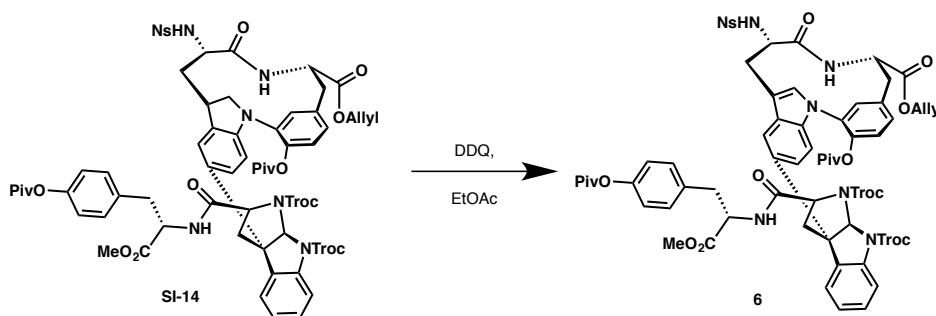

### Compound 6

A stoppered pressure vessel was charged with **SI-14** (2.42 g, 1.62 mmol, 1 equiv), DDQ (1.10 g, 4.86 mmol, 3.00 equiv), and EtOAc (15 mL). The vessel was sealed and heated to 100 °C for 36 h, at which time LC/MS analysis showed complete consumption of starting material. The mixture was cooled to rt, poured over aqueous NaHCO<sub>3</sub> (saturated, 50 mL), and extracted with additional EtOAc (4 X 50 mL). The combined organics were

dried (MgSO<sub>4</sub>) and concentrated *via* rotary evaporation, and the residue was purified *via* column chromatography (SiO<sub>2</sub>, 0-10% acetone/DCM) to yield **6** (2.12 g, 88%) as an orange foam:

$[\alpha]_{\text{D}}^{20} = 50.2$  ( $c = 1.0$ , CHCl<sub>3</sub>);

**<sup>1</sup>H NMR (600 MHz, CDCl<sub>3</sub>):**  $\delta$  8.16 (dd,  $J = 7.7, 1.6$  Hz, 1H), 7.96 – 7.90 (m, 2H), 7.86 – 7.78 (m, 3H), 7.51 (d,  $J = 7.6$  Hz, 1H), 7.40 (d,  $J = 8.5$  Hz, 1H), 7.35 – 7.31 (m, 1H), 7.18 (td,  $J = 7.5, 1.1$  Hz, 1H), 7.05 (ddd,  $J = 9.3, 6.1, 3.2$  Hz, 2H), 7.03 – 6.99 (m, 3H), 6.95 – 6.92 (m, 2H), 6.85 (s, 1H), 6.56 (s, 1H), 5.96 (d,  $J = 2.2$  Hz, 1H), 5.84 (ddt,  $J = 17.2, 10.4, 5.9$  Hz, 1H), 5.65 (d,  $J = 7.9$  Hz, 1H), 5.31 – 5.21 (m, 2H), 4.93 (dd,  $J = 9.4, 1.9$  Hz, 1H), 4.85 (d,  $J = 11.9$  Hz, 2H), 4.50 (dq,  $J = 6.0, 1.4$  Hz, 2H), 4.43 (ddd,  $J = 12.1, 10.3, 1.9$  Hz, 1H), 4.36 (dt,  $J = 7.7, 3.7$  Hz, 1H), 3.60 – 3.55 (m, 1H), 3.53 (s, 3H), 3.47 (d,  $J = 13.4$  Hz, 1H), 3.29 – 3.18 (m, 1H), 3.03 (dd,  $J = 14.6, 3.4$  Hz, 1H), 2.84 (dd,  $J = 14.4, 1.9$  Hz, 1H), 2.71 (dd,  $J = 13.6, 4.7$  Hz, 1H), 2.52 (dd,  $J = 14.3, 11.8$  Hz, 1H), 2.36 (dd,  $J = 13.4, 7.9$  Hz, 1H), 1.35 (s, 9H), 1.30 (s, 9H).

**<sup>13</sup>C NMR (151 MHz, CDCl<sub>3</sub>):**  $\delta$  177.3, 177.1, 171.5, 170.3, 169.6, 168.8, 151.9, 150.3, 148.9, 148.1, 147.5, 144.7, 140.3, 136.8, 135.5, 135.2, 135.1, 134.7, 134.6, 133.3, 133.3, 132.4, 131.9, 131.5, 130.1, 129.6, 129.3, 128.9, 127.9, 126.3, 126.1, 125.3, 123.9, 123.2, 121.8, 119.3, 117.8, 117.3, 116.1, 115.4, 114.1, 95.1, 95.0, 85.3, 75.6, 75.5, 66.4, 62.7, 60.9, 54.2, 53.4, 52.2, 39.3, 39.2, 37.9, 35.8, 27.5, 27.3, 27.3.

**HRMS:** Calc'd for C<sub>66</sub>H<sub>66</sub>Cl<sub>6</sub>N<sub>7</sub>O<sub>18</sub>S, [M+H]<sup>+</sup>, 1486.2311; found, 1486.2327.

$R_f = 0.52$  (Hex/EtOAc = 2:3; UV, Ce<sub>2</sub>(SO<sub>4</sub>)<sub>3</sub> in phosphomolybdic acid)

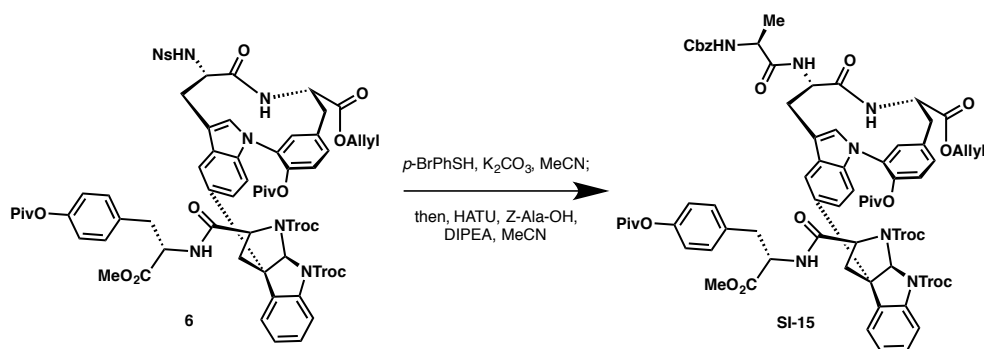

### SI-15

A solution of **6** (1.61 g, 1.08 mmol, 1 equiv) and 4-bromothiophenol (1.02 g, 5.40 mmol, 5.00 equiv) in MeCN (10 mL) was sparged with argon for 30 min. The septum was quickly removed, and K<sub>2</sub>CO<sub>3</sub> (745 mg, 5.40 mmol, 5.00 equiv) was added as a solid in a single portion. The septum was quickly replaced and the mixture stirred at rt for 1 h, at which time LC/MS analysis showed complete consumption of starting material.

At this time, in a separate flask, *N*-Cbz-*L*-Alanine (2.41 g, 10.8 mmol, 10.0 equiv) and HATU (4.11 g, 10.8 mmol, 10.0 equiv) were dissolved in MeCN (10 mL). DIPEA (5.7

mL, 33 mmol, 30 equiv) was then added, and the mixture stirred for 30 sec before being transferred quickly *via* syringe to the substrate/thiophenol-containing flask.

The resultant reaction was stirred for 30 min, then concentrated *via* rotary evaporation to a volume of *ca.* 5 mL, then diluted with EtOAc (60 mL). The mixture was washed with aqueous HCl (1 M, 3 X 50 mL) (added carefully with concomitant gas evolution), then aqueous NaHCO<sub>3</sub> (saturated, 2 X 50 mL), then brine (50 mL). The organic layer was dried (MgSO<sub>4</sub>) and concentrated *via* rotary evaporation, and the residue purified by column chromatography (SiO<sub>2</sub>, 0-16% acetone/DCM) to yield **SI-15** (1.08 g, 66%) as a white foam:

$[\alpha]_D^{20} = 40.1$  ( $c = 1.0$ , CHCl<sub>3</sub>);

**<sup>1</sup>H NMR (600 MHz, CDCl<sub>3</sub>):**  $\delta$  7.73 (d,  $J = 8.2$  Hz, 1H), 7.66 (d,  $J = 8.4$  Hz, 1H), 7.55 (d,  $J = 10.0$  Hz, 1H), 7.33 (dd,  $J = 5.0, 2.0$  Hz, 3H), 7.24 – 7.20 (m, 2H), 7.16 – 7.08 (m, 5H), 7.04 (d,  $J = 8.2$  Hz, 1H), 7.00 – 6.92 (m, 3H), 6.85 (s, 2H), 6.61 – 6.52 (m, 3H), 5.99 (d,  $J = 2.1$  Hz, 1H), 5.92 (ddt,  $J = 17.4, 10.6, 5.7$  Hz, 1H), 5.35 – 5.29 (m, 1H), 5.22 (dq,  $J = 10.6, 1.3$  Hz, 1H), 5.16 (d,  $J = 12.3$  Hz, 1H), 4.96 – 4.88 (m, 2H), 4.82 (t,  $J = 11.8$  Hz, 2H), 4.72 (d,  $J = 11.8$  Hz, 1H), 4.62 – 4.56 (m, 3H), 4.37 (ddd,  $J = 12.4, 10.1, 2.6$  Hz, 1H), 4.29 (s, 1H), 4.07 (tt,  $J = 7.6, 4.3$  Hz, 1H), 3.76 (d,  $J = 12.1$  Hz, 1H), 3.53 (s, 3H), 3.53 – 3.47 (m, 1H), 2.94 – 2.83 (m, 2H), 2.68 (dd,  $J = 14.7, 3.1$  Hz, 1H), 2.53 (dd,  $J = 13.7, 5.3$  Hz, 1H), 2.40 (s, 1H), 2.22 (s, 1H), 1.69 – 1.63 (m, 3H), 1.33 (d,  $J = 6.0$  Hz, 17H).

**<sup>13</sup>C NMR (151 MHz, CDCl<sub>3</sub>):**  $\delta$  177.5, 177.2, 171.6, 171.5, 170.7, 169.7, 168.7, 157.6, 154.4, 152.4, 150.3, 149.2, 147.6, 144.4, 139.0, 136.4, 136.0, 135.4, 135.3, 135.2, 133.2, 132.0, 130.1, 129.5, 129.3, 129.0, 128.9, 128.8, 128.1, 125.5, 122.9, 121.7, 118.5, 117.3, 117.2, 116.9, 114.6, 94.9, 94.6, 85.9, 76.0, 75.9, 67.6, 66.1, 63.1, 59.0, 57.0, 54.4, 53.4, 52.8, 52.3, 39.5, 39.3, 39.2, 38.3, 34.9, 27.3, 27.2, 24.9, 16.7.

**HRMS:** Calc'd for C<sub>71</sub>H<sub>74</sub>Cl<sub>6</sub>N<sub>7</sub>O<sub>17</sub>, [M+H]<sup>+</sup>, 1506.3267; found, 1506.3261.

$R_f = 0.25$  (Hex:EtOAc = 1:1; UV, Ce<sub>2</sub>(SO<sub>4</sub>)<sub>3</sub> in phosphomolybdic acid)

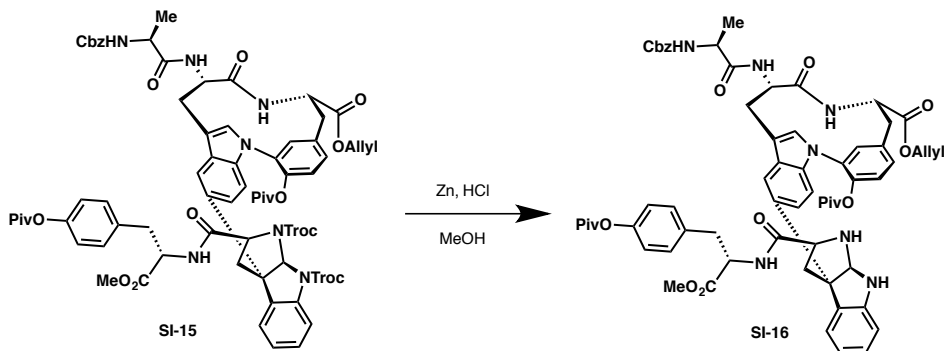

*Note: Vigorous stirring is extremely important for this reaction. Reduced stirring vigor will reduce yields. Also, in our hands, attempts to increase this reaction's scale beyond what is reported here resulted in lower yields.*

### SI-16

To a vigorously (1500 RPM) stirred solution of **SI-15** (100 mg, 0.0663 mmol, 1 equiv) in MeOH (4 mL) was added aqueous HCl (3 M, 1 mL). The resultant slurry was cooled to 0 °C, then was added Zn dust (1 g) and the mixture was allowed to warm to rt. After 2 h, LC/MS analysis showed complete deprotection. At this time, the mixture was filtered over a pad of Celite, washing with additional MeOH (*ca.* 6 X 5 mL). The filtrate was concentrated *via* rotary evaporation, and the residue purified *via* column chromatography (SiO<sub>2</sub>, 0-7% MeOH/DCM with 0.5% Et<sub>3</sub>N) to yield **SI-16** (49 mg, 64%) as a white foam:

$[\alpha]_D^{20} = 19.7$  ( $c = 1.0$ , CHCl<sub>3</sub>);

**<sup>1</sup>H NMR (600 MHz, CDCl<sub>3</sub>):**  $\delta$  7.59 (d,  $J = 8.5$  Hz, 1H), 7.44 (d,  $J = 5.9$  Hz, 1H), 7.36 (dd,  $J = 5.1, 1.9$  Hz, 3H), 7.25 (d,  $J = 6.2$  Hz, 1H), 7.21 (dd,  $J = 7.4, 1.2$  Hz, 1H), 7.11 (ddd,  $J = 8.6, 5.4, 2.5$  Hz, 8H), 7.04 (d,  $J = 8.3$  Hz, 1H), 7.02 – 7.00 (m, 2H), 6.95 (td,  $J = 7.4, 0.9$  Hz, 1H), 6.89 (d,  $J = 1.8$  Hz, 1H), 6.51 (s, 1H), 6.41 (d,  $J = 7.8$  Hz, 1H), 6.37 (d,  $J = 9.1$  Hz, 1H), 5.93 – 5.83 (m, 2H), 5.32 – 5.27 (m, 1H), 5.21 – 5.17 (m, 1H), 5.00 (s, 1H), 4.76 (d,  $J = 11.9$  Hz, 1H), 4.71 (dt,  $J = 9.1, 3.6$  Hz, 1H), 4.57 (dq,  $J = 5.4, 1.8$  Hz, 2H), 4.32 (ddd,  $J = 11.5, 9.9, 2.4$  Hz, 1H), 4.04 – 3.98 (m, 2H), 3.87 (d,  $J = 11.8$  Hz, 1H), 3.81 (dt,  $J = 9.0, 4.5$  Hz, 1H), 3.60 (s, 3H), 3.46 – 3.42 (m, 1H), 3.04 (dd,  $J = 13.6, 2.5$  Hz, 1H), 2.95 – 2.86 (m, 3H), 2.66 (dt,  $J = 13.9, 3.8$  Hz, 3H), 1.34 (d,  $J = 1.0$  Hz, 18H), 1.20 (d,  $J = 7.5$  Hz, 3H).

**<sup>13</sup>C NMR (151 MHz, CDCl<sub>3</sub>):**  $\delta$  177.6, 177.5, 173.0, 172.4, 171.8, 170.6, 169.6, 157.1, 150.4, 148.3, 148.2, 146.3, 144.5, 139.1, 136.4, 135.6, 135.4, 133.7, 133.6, 131.9, 131.7, 130.3, 129.4, 129.1, 128.8, 128.7, 128.6, 128.5, 127.2, 123.7, 123.0, 122.0, 121.7, 118.2, 117.3, 117.1, 116.7, 112.0, 88.2, 67.3, 66.0, 62.6, 62.6, 56.4, 54.4, 53.5, 52.3, 52.0, 46.6, 39.3, 39.2, 37.8, 34.3, 27.3, 27.2, 25.0, 17.7.

**HRMS:** Calc'd for C<sub>65</sub>H<sub>72</sub>N<sub>7</sub>O<sub>13</sub>, [M+H]<sup>+</sup>, 1158.5183; found, 1158.5195.

$R_f = 0.25$  (Hex/EtOAc = 1:4; UV, Ce<sub>2</sub>(SO<sub>4</sub>)<sub>3</sub> in phosphomolybdic acid)

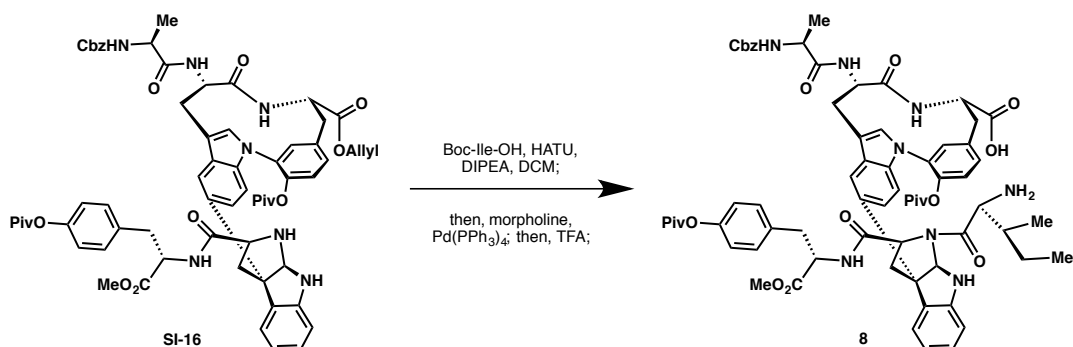

### Compound 8

To a stirred solution of **SI-16** (49 mg, 0.042 mmol, 1 equiv) in DCM (0.5 mL) was added *N*-Boc-isoleucine (98 mg, 0.42 mmol, 10 equiv), then HATU (161 mg, 0.423 mmol, 10 equiv), then DIPEA (0.22 mL, 1.3 mmol, 30 equiv). The mixture was stirred at rt for 24 h, at which time LCMS analysis showed complete consumption of starting material.

The reaction was cooled to 0 °C, then morpholine (0.05 mL, 0.6 mmol, 15 equiv) was added, followed by Pd(PPh<sub>3</sub>)<sub>4</sub> (0.5 mg, 0.0004 mmol, 1 mol%). The mixture was warmed to rt and stirred for 30 min, at which time LC/MS analysis showed complete conversion to the deallylated product (i.e., complete disappearance of a peak with  $m/z = 1371.6$ , with concomitant formation of a peak with  $m/z = 1331.6$ ).

At this time, the mixture was cooled to 0 °C, and TFA (3 mL) was added dropwise. The mixture was again warmed to rt and stirred for 1 h, at which time LC/MS analysis showed complete deprotection of the Boc moiety (i.e., complete disappearance of the peak with  $m/z = 1331.6$ , with concomitant formation of a peak with  $m/z = 1231.6$ ).

At this time, the reaction mixture was concentrated *via* rotary evaporation, and the viscous oily residue was diluted with DMSO (0.6 mL). The resultant solution was purified *via* preparative HPLC (C18, 45-65% MeCN/H<sub>2</sub>O with 0.1% HCO<sub>2</sub>H over 12 min; product elutes at 6.4 min). The fractions containing desired material were combined and lyophilized to yield a white foam. This white foam was dissolved in a mixture of MeCN (2 mL) and aqueous HCl (30 mM, 2 mL), and lyophilized a second time, to yield the title product's HCl salt (16 mg, 30%) as a white foam:

$$[\alpha]_D^{24.4} = 39.2 \text{ (} c = 1.0, \text{CHCl}_3\text{)};$$

**NMR:** Due to the rotamerism of this compound, its NMR was not assigned (see spectral data).

**HRMS:** Calc'd for C<sub>68</sub>H<sub>79</sub>N<sub>8</sub>O<sub>14</sub>, [M+H]<sup>+</sup>, 1231.5710; found, 1231.5721.

**LC/low-resolution MS trace (254 nm absorption in top lane; SIR in bottom lane):**

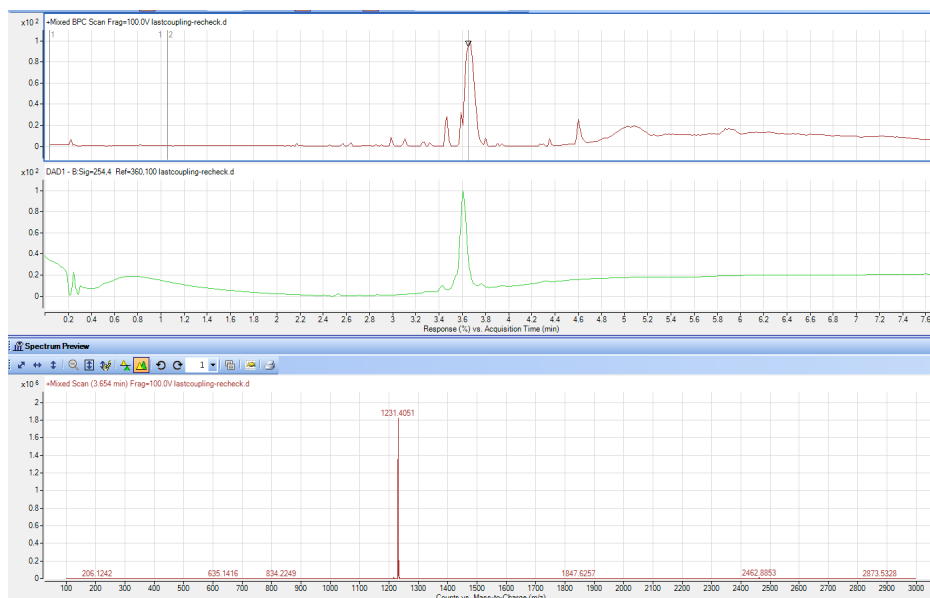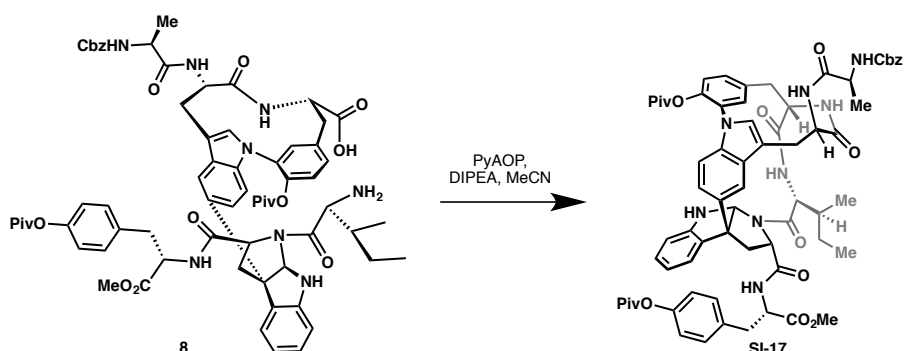

### SI-17

A 24-mL syringe was charged with zwitterion **8** (16 mg, 0.013 mmol, 1 equiv) in MeCN (15 mL). A separate 24-mL syringe was charged with PyAOP (14 mg, 0.026 mmol, 2 equiv) in MeCN (15 mL). A 100-mL round-bottom flask fitted with a septum was charged with DIPEA (3 drops from a 22-gauge needle; *ca.* 0.015 mL, *ca.* 0.086 mmol, *ca.* 6 equiv) in MeCN (3 mL). The flask was warmed to 55 °C; then, the two aforementioned syringes were mounted in a 2-barrel syringe pump and concurrently added to the DIPEA solution over 12 h. After complete addition, LCMS analysis showed complete consumption of starting material. At this time, the reaction was cooled to rt, DMSO (1 mL) was added, and the excess solvent removed *via* rotary evaporation. The resultant DMSO solution was purified *via* preparative HPLC (C18, 65-95% MeCN/H<sub>2</sub>O with 0.1% HCO<sub>2</sub>H over 12 min; product elutes at 7.7 min). Fractions containing the desired product were combined and lyophilized to yield **SI-17** (0.6 mg, 4%) as a white foam:

$$[\alpha]_{\text{D}}^{23.1} = -2.2 \text{ (} c = 1.0, \text{ MeOH)};$$

**NMR:** Due to the rotamerism of this compound, its NMR was not assigned (see spectral data).



HRMS: Calc'd for C<sub>68</sub>H<sub>77</sub>N<sub>8</sub>O<sub>13</sub> ([M+H]<sup>+</sup>), 1213.5610; found, 1213.5608.

LC/low-resolution MS trace (254 nm absorption in top lane; SIR in bottom lane):

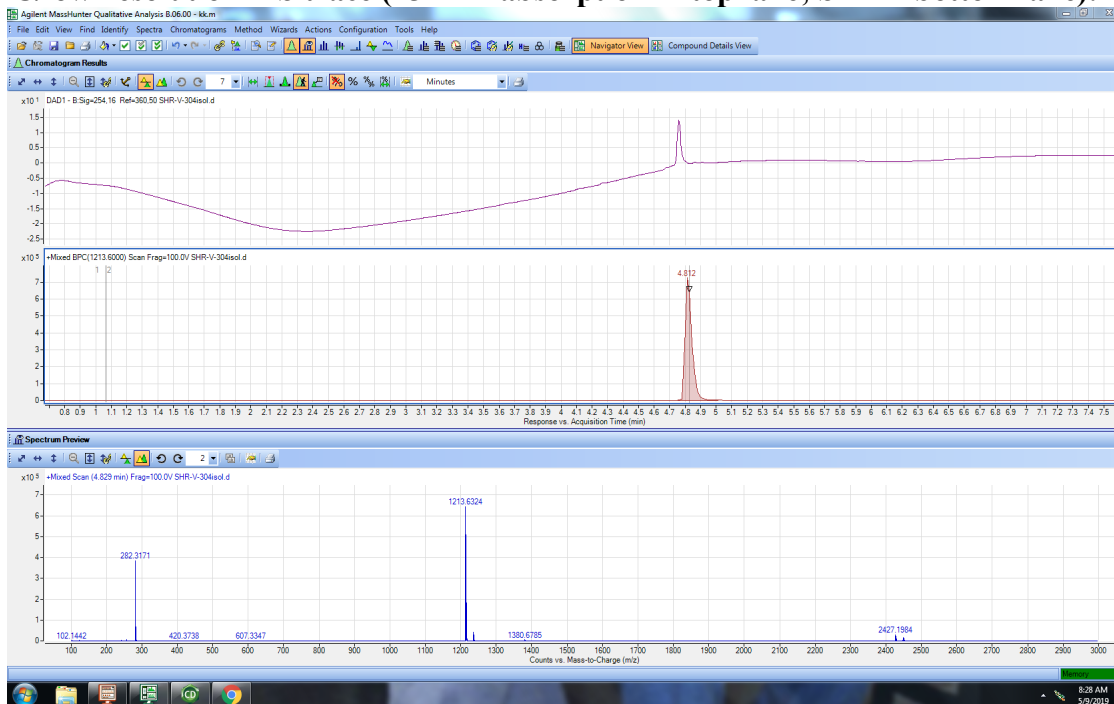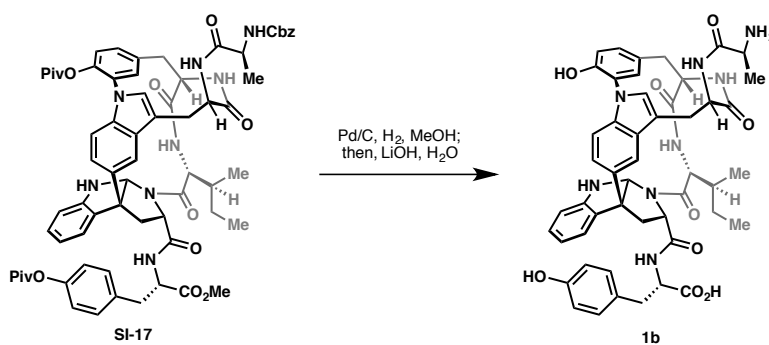

### atrop-tryptorubin A (1b)

SI-17 (0.6 mg, 0.0005 mmol) was dissolved in MeOH (0.5 mL). The solution was sparged with argon for 30 min, then Pd/C (*ca.* 0.1 mg) was added. The solution was put under an atmosphere of H<sub>2</sub> (tripled party balloon; *ca.* 1.1 atm) and subjected to 3 vacuum/backfill cycles, then stirred at rt for 24 h, at which time LC/MS analysis showed complete removal of the Cbz protecting group (i.e., complete disappearance of a peak with *m/z* = 1213.6, with concomitant formation of a peak with *m/z* = 1079.5). At this time, the atmosphere was changed to argon, and the mixture was subjected to an additional 3 vacuum/backfill cycles. Then, aqueous LiOH (1N, 0.1 mL) was added, and the mixture was stirred at rt for 2 h at which time LC/MS analysis showed complete conversion (i.e., complete disappearance of the peak with *m/z* = 1079.5, with concomitant formation of a peak with *m/z* = 897.4). The mixture was quenched with HCl (1 M, 0.1

mL), then filtered through a pad of Celite, washing with additional MeOH (*ca.* 3 X 1 mL). The resultant filtrate was diluted with DMSO (0.3 mL) and excess solvent removed *via* rotary evaporation. The concentrated solution was purified *via* preparative HPLC (C18, 15-35% MeCN/H<sub>2</sub>O with 0.1% HCO<sub>2</sub>H over 12 min; product elutes at 9.5 min), and the fractions containing desired product were combined and lyophilized to yield the title product's formate salt (0.4 mg, 90%) as a white solid.

$[\alpha]_D^{25.8} = -19.6$  ( $c = 0.2$ , MeOH);

**NMR:** See tabulated data, page 52

**HRMS:** Calc'd for C<sub>49</sub>H<sub>53</sub>N<sub>8</sub>O<sub>9</sub> ([M+H]<sup>+</sup>), 897.3936; found, 897.3913.

**LC/low-resolution MS trace:** See *LCMS co-injection of natural and synthetic tryptorubin A*, page 68

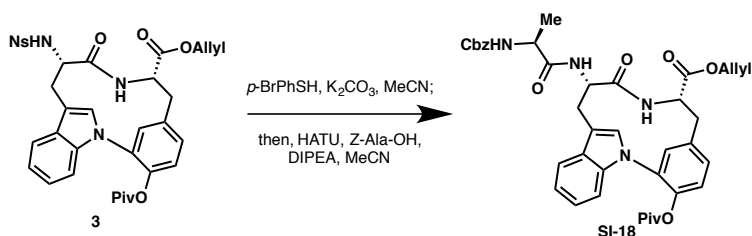

### SI-18

A solution of **3** (10.1 g, 15.0 mmol, 1 equiv) and *p*-bromothiophenol (14.2 g, 75.0 mmol, 5.00 equiv) were dissolved in MeCN (150 mL) and sparged with argon for 30 min. In one portion, K<sub>2</sub>CO<sub>3</sub> (10.4 g, 75.0 mmol, 5.00 equiv) was added, and the mixture stirred at rt for 1 h. At this time, the solution was cooled to 0 °C. In a separate flask, *N*-Cbz-*L*-alanine (22.3 g, 100 mmol, 6.67 equiv) and HATU (38.0 g, 100 mmol, 6.67 equiv) were combined in MeCN (100 mL). In one portion, DIPEA (52 mL, 300 mmol, 20 equiv) was added, and the mixture stirred at rt for 30 seconds before being added in a single portion to the cooled macrocycle solution. The mixture was allowed to warm to rt and stir for 30 min. The mixture was then poured into HCl (1 M, 500 mL) and extracted with EtOAc (3 X 300 mL). The combined organics were washed with brine, dried (MgSO<sub>4</sub>), and concentrated, and the residue was purified *via* column chromatography (SiO<sub>2</sub>, 0-80% EtOAc/hex) to yield the title product (9.06 g, 87%) as a yellow foam:

$[\alpha]_D^{25.1} = 64.4$  ( $c = 1.0$ , CHCl<sub>3</sub>);

**<sup>1</sup>H NMR (600 MHz, CDCl<sub>3</sub>):** δ 7.56 (d,  $J = 7.7$  Hz, 1H), 7.54 (d,  $J = 8.0$  Hz, 1H), 7.35 (d,  $J = 9.9$  Hz, 1H), 7.33 – 7.27 (m, 4H), 7.17 (t,  $J = 7.6$  Hz, 1H), 7.10 (dd,  $J = 8.3, 2.2$  Hz, 1H), 7.07 – 7.01 (m, 3H), 6.72 (d,  $J = 9.4$  Hz, 1H), 6.58 (s, 1H), 5.94 (d,  $J = 2.2$  Hz, 1H), 5.89 (ddt,  $J = 16.4, 10.8, 5.5$  Hz, 1H), 5.31 (d,  $J = 17.2$  Hz, 1H), 5.21 (dd,  $J = 10.5, 1.5$  Hz, 1H), 4.96 (dt,  $J = 9.4, 3.7$  Hz, 1H), 4.83 (d,  $J = 3.1$  Hz, 1H), 4.73 (d,  $J = 11.7$  Hz, 1H), 4.64 – 4.55 (m, 2H), 4.43 (dt,  $J = 9.8, 6.7$  Hz, 1H), 4.03 (d,  $J = 11.8$  Hz, 1H), 3.98

(qd,  $J = 7.3, 3.0$  Hz, 1H), 3.60 (dd,  $J = 14.5, 3.5$  Hz, 1H), 2.96 – 2.87 (m, 3H), 1.48 (d,  $J = 7.3$  Hz, 3H), 1.34 (s, 9H).

$^{13}\text{C}$  NMR (151 MHz,  $\text{CDCl}_3$ ):  $\delta$  177.4, 171.1, 170.6, 169.7, 156.8, 145.0, 146.1, 144.7, 136.2, 135.6, 134.8, 134.4, 131.7, 129.3, 129.0, 128.6, 128.6, 128.4, 125.0, 123.2, 123.0, 118.4, 118.3, 117.1, 116.9, 67.6, 66.0, 56.4, 54.3, 52.5, 39.3, 34.4, 27.3, 25.5, 17.7.

HRMS: Calc'd for  $\text{C}_{39}\text{H}_{43}\text{N}_4\text{O}_8$ ,  $[\text{M}+\text{H}]^+$ , 695.3075; found, 695.3090.

$R_f = 0.20$  (Hex:EtOAc = 1:1; UV,  $\text{Ce}_2(\text{SO}_4)_3$  in phosphomolybdic acid)

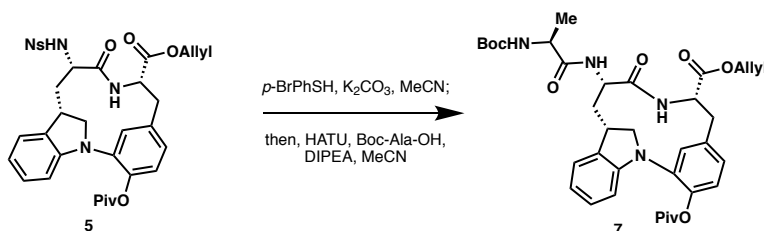

### Compound 7

A solution of **5** (68 mg, 0.10 mmol, 1 equiv) and  $p$ -bromothiophenol (95 mg, 0.50 mmol, 5.00 equiv) were dissolved in MeCN (1 mL) and sparged with argon for 30 min. In one portion,  $\text{K}_2\text{CO}_3$  (69 mg, 0.50 mmol, 5.00 equiv) was added, and the mixture stirred at rt for 1 h. At this time, the solution was cooled to 0 °C. In a separate flask, Boc-alanine (126 mg, 0.67 mmol, 6.67 equiv) and HATU (253 mg, 0.67 mmol, 6.67 equiv) were combined in MeCN (1 mL). In one portion, DIPEA (0.35 mL, 2 mmol, 20 equiv) was added, and the mixture stirred at rt for 30 seconds before being added in a single portion to the cooled macrocycle solution. The mixture was allowed to warm to rt and stir for 30 min. The mixture was then poured into HCl (1 M, 5 mL) and extracted with EtOAc (3 X 5 mL). The combined organics were washed with brine, dried ( $\text{MgSO}_4$ ), and concentrated, and the residue was purified *via* column chromatography ( $\text{SiO}_2$ , 0-80% EtOAc/hex) to yield the **7** (50 mg, 75%) as a yellow foam. Crystals suitable for X-ray diffraction were formed by dissolving the compound in MeCN (*ca.* 100 mg/mL) and allowing the mixture to slowly evaporate until crystals were observed.

**X-ray crystallography:** Solved structure; see details on page 134.

$[\alpha]_D^{23.1} = -10.2$  ( $c = 0.4$ , MeOH);

$^1\text{H}$  NMR (600 MHz,  $\text{DMSO}-d_6$ ) (Major rotamer)  $\delta$  7.22 – 7.14 (m, 1H), 7.13 – 7.07 (m, 1H), 7.04 (t,  $J = 7.7$  Hz, 1H), 7.01 (d,  $J = 8.1$  Hz, 1H), 6.92 – 6.77 (m, 3H), 6.59 (d,  $J = 7.8$  Hz, 1H), 5.86 (ddt,  $J = 17.5, 10.7, 5.4$  Hz, 1H), 5.27 (dd,  $J = 17.3, 1.7$  Hz, 1H), 5.18 (dd,  $J = 10.5, 1.5$  Hz, 1H), 4.55 (d,  $J = 5.4$  Hz, 2H), 4.16 (t,  $J = 10.6$  Hz, 1H), 4.08 – 3.96 (m, 1H), 3.96 – 3.81 (m, 1H), 3.69 – 3.53 (m, 1H), 3.37 – 3.31 (m, 2H), 2.98 (d,  $J = 11.2$  Hz, 1H), 2.69 – 2.60 (m, 1H), 2.21 – 2.10 (m, 1H), 2.09 – 1.97 (m, 1H), 1.35 (s, 9H), 1.21 (s, 9H), 1.10 (d,  $J = 7.1$  Hz, 3H).

$^{13}\text{C}$  NMR (151 MHz, DMSO) (Major rotamer)  $\delta$  176.5, 171.8, 171.4, 170.2, 155.2, 151.2, 136.8, 136.5, 132.2, 132.2, 132.1, 128.2, 126.9, 124.1, 122.7, 121.1, 118.1, 117.6, 114.6, 78.1, 65.2, 65.1, 54.9, 54.1, 53.3, 49.4, 40.4, 38.5, 36.8, 28.2, 26.8, 17.8.

HRMS: Calc'd for  $\text{C}_{36}\text{H}_{47}\text{N}_4\text{O}_8$ ,  $[\text{M}+\text{H}]^+$ , 663.3388; found, 663.3389.

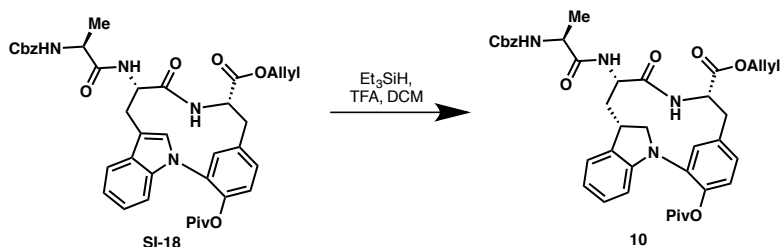

### Compound 10

To a solution of **SI-18** (9.06 g, 13.1 mmol) in DCM (100 mL) was added sequentially  $\text{Et}_3\text{SiH}$  (100 mL), then TFA (100 mL). The mixture was stirred at rt for 4 h, then the volatiles removed *via* rotary evaporation, and the residue purified *via* column chromatography ( $\text{SiO}_2$ , 0-16% acetone/DCM) to yield **10** (8.58 g, 94%) as a yellow foam:

$[\alpha]_{\text{D}}^{24.4} = 69.2$  ( $c = 1.0$ ,  $\text{CHCl}_3$ );

$^1\text{H}$  NMR (600 MHz,  $\text{CDCl}_3$ ):  $\delta$  7.36 – 7.29 (m, 3H), 7.25 – 7.20 (m, 3H), 7.16 – 7.07 (m, 2H), 7.07 – 7.01 (m, 2H), 6.96 – 6.87 (m, 2H), 6.78 (d,  $J = 7.9$  Hz, 1H), 6.07 (s, 1H), 5.91 (ddt,  $J = 16.4, 10.9, 5.6$  Hz, 1H), 5.34 (dd,  $J = 17.2, 1.5$  Hz, 1H), 5.24 (dd,  $J = 10.5, 1.3$  Hz, 1H), 5.11 (d,  $J = 11.8$  Hz, 1H), 5.02 (s, 1H), 4.73 – 4.59 (m, 3H), 4.54 (s, 1H), 4.31 (t,  $J = 10.3$  Hz, 1H), 4.14 (t,  $J = 11.4$  Hz, 1H), 3.98 (s, 1H), 3.61 (s, 1H), 3.43 (dd,  $J = 11.6, 3.7$  Hz, 1H), 3.08 (dd,  $J = 13.2, 2.3$  Hz, 1H), 2.88 (t,  $J = 12.5$  Hz, 1H), 2.69 (d,  $J = 15.5$  Hz, 1H), 2.26 – 2.06 (m, 1H), 1.36 (d,  $J = 7.3$  Hz, 3H), 1.33 (s, 9H).

$^{13}\text{C}$  NMR (151 MHz,  $\text{CDCl}_3$ ):  $\delta$  176.8, 171.6, 170.5, 168.7, 156.3, 150.9, 145.4, 143.8, 136.2, 135.1, 134.2, 131.7, 129.6, 128.8, 128.8, 128.6, 126.1, 125.6, 125.3, 124.0, 120.4, 118.7, 115.7, 67.7, 66.1, 62.1, 54.8, 52.2, 51.7, 39.4, 39.2, 38.2, 32.1, 27.4, 17.7.

HRMS: Calc'd for  $\text{C}_{39}\text{H}_{45}\text{N}_4\text{O}_8$ ,  $[\text{M}+\text{H}]^+$ , 697.3232; found, 697.3240.

$R_f = 0.50$  (DCM:acetone = 8:1; UV,  $\text{Ce}_2(\text{SO}_4)_3$  in phosphomolybdic acid)

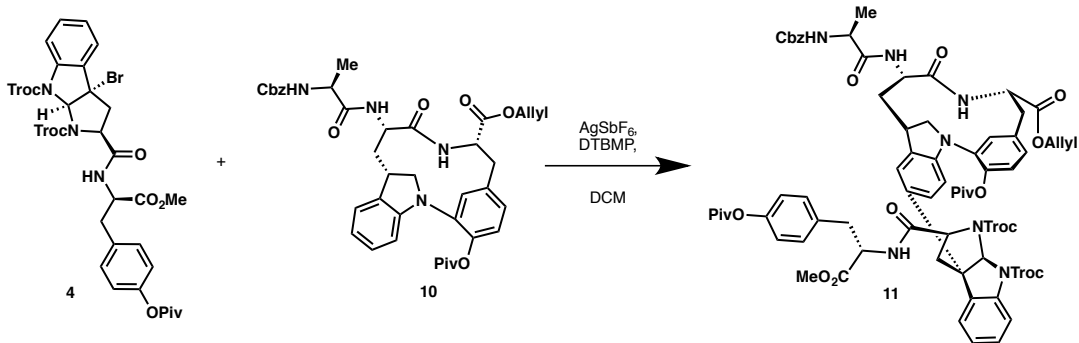

### Compound 11

Macrocycle **10** (8.58 g, 12.3 mmol, 1 equiv), alkyl bromide **4** (16.5 g, 18.5 mmol, 1.50 equiv), and 2,6-di-*t*-butyl-4-methylpyridine (7.6 g, 37 mmol, 3.0 equiv) were combined and azeotroped from benzene three times (3 X 50 mL). After the final azeotrope, the mixture was held under vacuum (<1 torr) for 13 h. The flask was backfilled with argon, and DCM (240 mL) was added. The septum was quickly removed, AgSbF<sub>6</sub> (12.7 g, 37 mmol, 3.00 equiv) was added as a solid in a single portion, and the septum quickly replaced. The resultant brown slurry was stirred for 1 h at rt, then filtered over a pad of Celite, washing with large amounts of DCM (*ca.* 5 X 200 mL). The filtrate was concentrated *via* rotary evaporation, and the residue purified *via* column chromatography (SiO<sub>2</sub>, 0-20% acetone/DCM) to yield **11** (11.5 g, 62%) as a pale-yellow foam:

$[\alpha]_D^{23.6} = -14.8$  ( $c = 1.0$ , CHCl<sub>3</sub>);

**NMR:** Due to rotamerism (see spectra), the NMR of this compound was not assigned.

**HRMS:** Calc'd for C<sub>71</sub>H<sub>76</sub>Cl<sub>6</sub>N<sub>4</sub>O<sub>17</sub>, [M+H]<sup>+</sup>, 1508.3423; found, 1508.3408.

$R_f = 0.45$  (DCM:acetone = 8:1; UV, Ce<sub>2</sub>(SO<sub>4</sub>)<sub>3</sub> in phosphomolybdic acid)

**LC/low-resolution MS trace (254 nm absorption in top lane; SIR in bottom lane):**

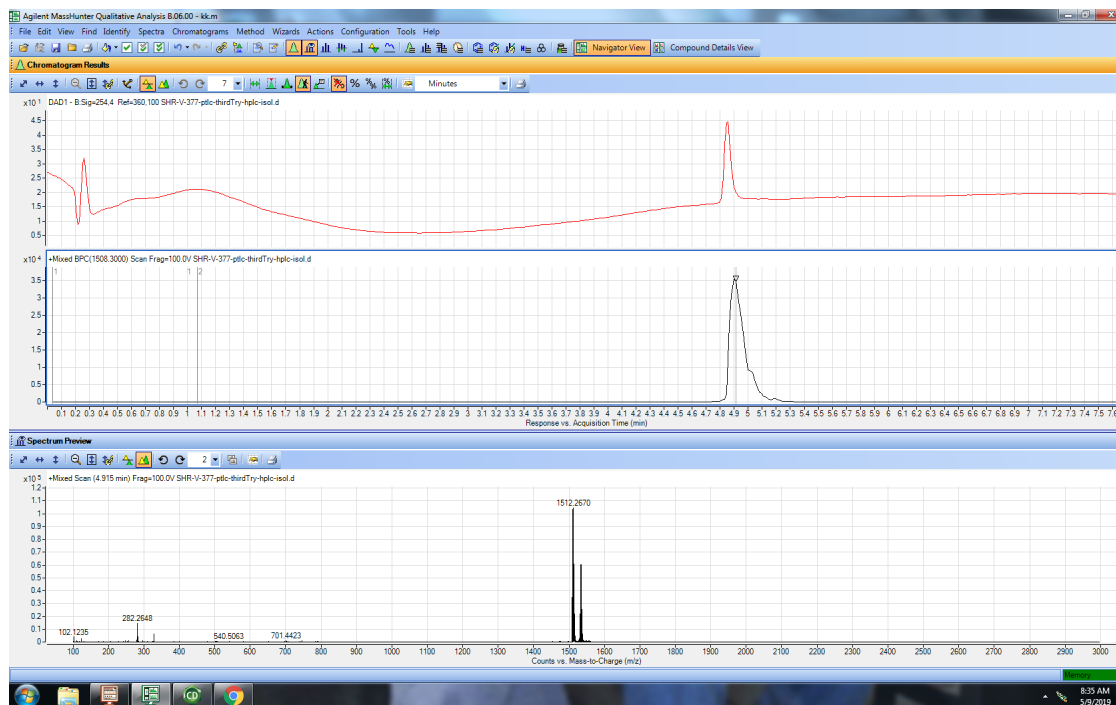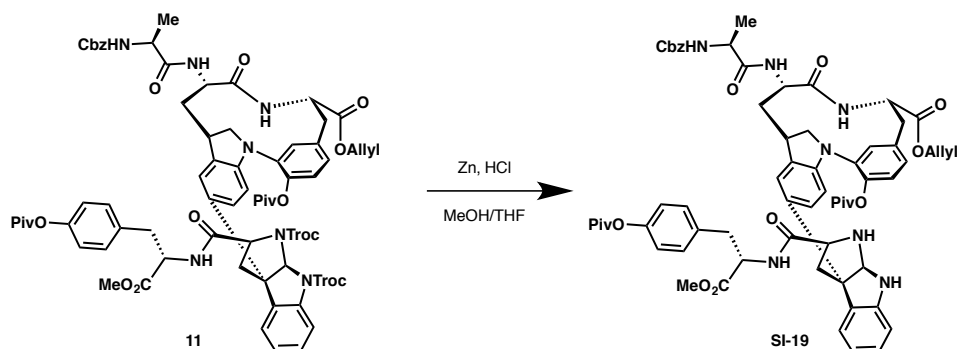

### SI-19

A solution of **11** (11.5 g, 7.61 mmol) in MeOH/THF (2:1; 1.2 L total volume) was cooled to 0 °C. Then, sequentially, aqueous HCl (3 N, 60 mL, 180 mmol) and Zn<sup>0</sup> (11.7 g, 180 mmol) were added. The mixture was stirred at 0 °C, then filtered over a pad of Celite, washing with additional MeOH. The filtrate was concentrated *via* rotary evaporation, and the residue purified *via* column chromatography (SiO<sub>2</sub>, 0-8% MeOH/DCM with 0.5% Et<sub>3</sub>N) to yield **SI-19** (7.36 g, 84%) as a white foam:

$$[\alpha]_D^{23.1} = -22.8 (c = 1.0, \text{CHCl}_3);$$

<sup>1</sup>H NMR (600 MHz, CDCl<sub>3</sub>): δ 7.49 – 7.30 (m, 6H), 7.24 – 7.16 (m, 2H), 7.11 (d, *J* = 8.4 Hz, 2H), 7.09 – 7.01 (m, 5H), 6.94 – 6.86 (m, 4H), 6.76 (s, 1H), 6.36 (d, *J* = 7.8 Hz, 1H), 6.13 (d, *J* = 9.8 Hz, 1H), 5.89 (ddt, *J* = 16.5, 11.0, 5.7 Hz, 1H), 5.31 (dd, *J* = 17.2, 1.6 Hz, 1H), 5.25 (s, 1H), 5.21 (d, *J* = 10.5 Hz, 1H), 5.14 (d, *J* = 11.9 Hz, 1H), 4.83 (s, 1H), 4.60 (qd, *J* = 13.3, 5.6 Hz, 2H), 4.51 (d, *J* = 11.9 Hz, 1H), 4.25 – 4.17 (m, 1H), 4.16 – 3.96 (m, 2H), 3.93 (d, *J* = 9.2 Hz, 1H), 3.90 – 3.81 (m, 2H), 3.57 (s, 3H), 3.49 (s, 1H),

3.33 (dd,  $J = 11.7, 4.4$  Hz, 1H), 3.10 – 3.03 (m, 2H), 2.85 (t,  $J = 12.3$  Hz, 1H), 2.65 – 2.53 (m, 3H), 2.47 (dd,  $J = 13.4, 9.3$  Hz, 1H), 1.98 (dt,  $J = 15.7, 5.4$  Hz, 1H), 1.36 (s, 9H), 1.33 (s, 9H), 1.05 (d,  $J = 7.4$  Hz, 3H).

$^{13}\text{C}$  NMR (151 MHz,  $\text{CDCl}_3$ ):  $\delta$  177.6, 176.8, 173.0, 172.4, 172.1, 170.5, 168.3, 157.0, 150.4, 150.2, 148.0, 144.9, 144.5, 136.4, 136.2, 135.9, 133.7, 132.7, 131.9, 130.5, 130.3, 128.8, 128.7, 128.6, 128.4, 127.4, 125.6, 125.5, 123.9, 123.3, 122.1, 121.3, 118.6, 116.5, 112.4, 87.4, 67.4, 66.0, 62.7, 62.7, 62.3, 60.5, 54.8, 54.7, 53.6, 53.5, 52.3, 51.9, 51.8, 51.6, 47.6, 39.2, 39.2, 37.8, 27.4, 27.3, 17.7.

HRMS: Calc'd for  $\text{C}_{65}\text{H}_{74}\text{N}_7\text{O}_{13}$ ,  $[\text{M}+\text{H}]^+$ , 1160.5339; found, 1160.5352.

R<sub>f</sub>: 0.30 (Hex:EtOAc = 1:4; UV,  $\text{Ce}_2(\text{SO}_4)_3$  in phosphomolybdic acid)

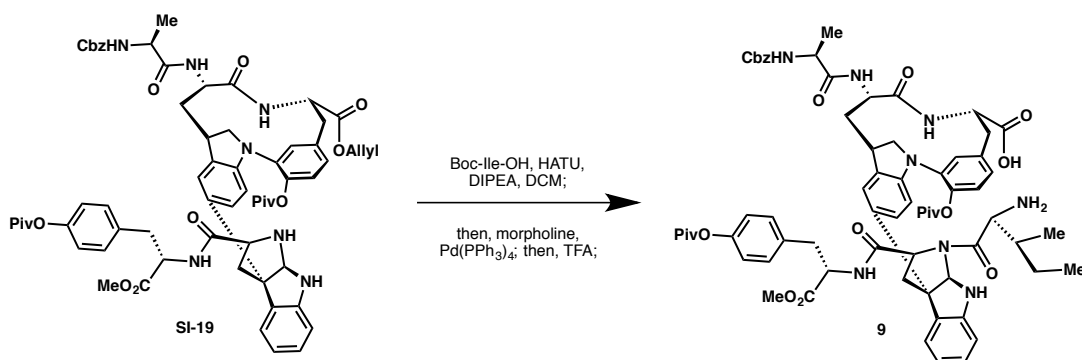

### Compound 9

To a solution of **SI-19** (7.36 g, 6.34 mmol, 1 equiv), *N*-Boc-L-Isoleucine (2.20 g, 9.51 mmol, 1.50 equiv), and HATU (3.61 g, 9.51 mmol, 1.50 equiv) in DCM (120 mL) was added DIPEA (5.0 mL, 29 mmol, 4.6 equiv). The mixture was stirred at rt for 12 h, at which time LCMS showed complete consumption of starting material. The mixture was cooled to 0 °C, and morpholine (5.5 mL, 63 mmol, 10 equiv) was added, followed by Pd(PPh<sub>3</sub>)<sub>4</sub> (73 mg, 0.063 mmol, 1 mol%). The mixture was warmed to rt and stirred 1 h. Then, the volatiles were removed *via* rotary evaporation. The residue was taken up in DCM (40 mL), then TFA (40 mL) was added. After stirring at rt for 20 min, the volatiles were again removed. The residue was taken up in DMSO (2 mL) and purified *via* preparative HPLC (C18, 35-55% MeCN/H<sub>2</sub>O with 0.1% HCO<sub>2</sub>H over 12 min; product elutes at 10.5 min). Fractions containing the desired product were lyophilized, and the residue was taken up in MeCN/aqueous HCl (10 mL of MeCN and 30 mL of 20 mM HCl) and lyophilized a second time, to yield **9** (2.24 g, 29%) as a yellow foam:

$[\alpha]_{\text{D}}^{25} = -72.9$  ( $c = 1.0$ ,  $\text{CHCl}_3$ );

NMR: Due to rotamerism (see spectra), the NMR of this compound was not assigned.

HRMS: Calc'd for  $\text{C}_{68}\text{H}_{81}\text{N}_8\text{O}_{14}$ ,  $[\text{M}+\text{H}]^+$ , 1233.5867; found, 1233.5852.

LC/low-resolution MS trace (254 nm absorption top lane; SIR bottom lane):

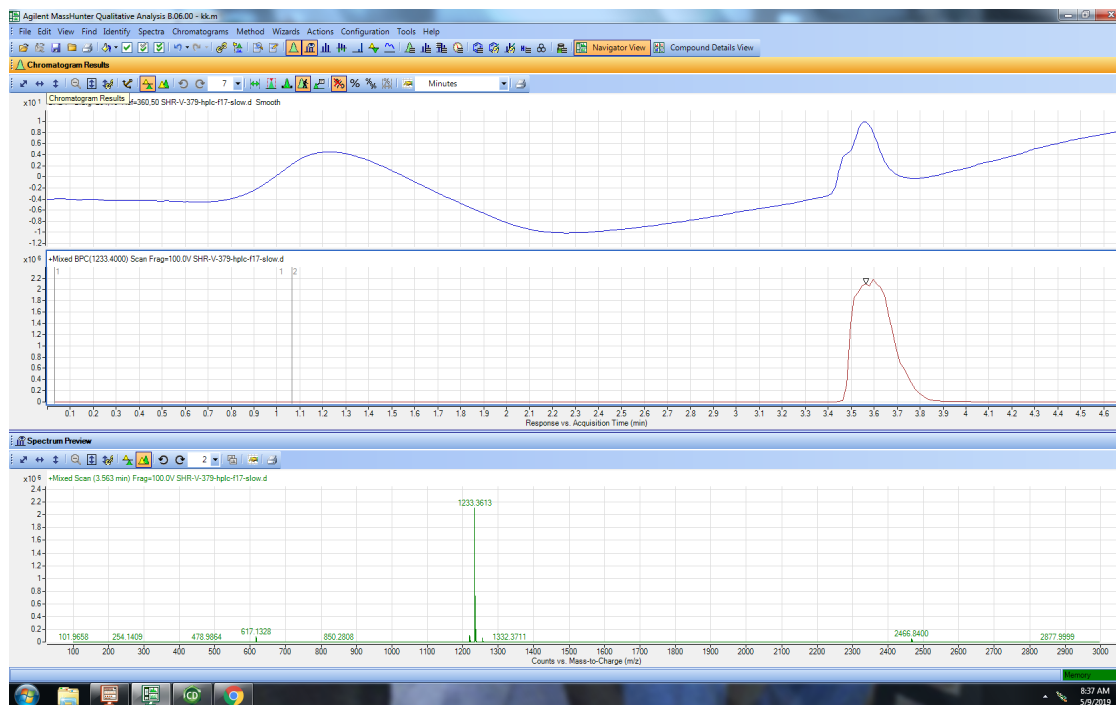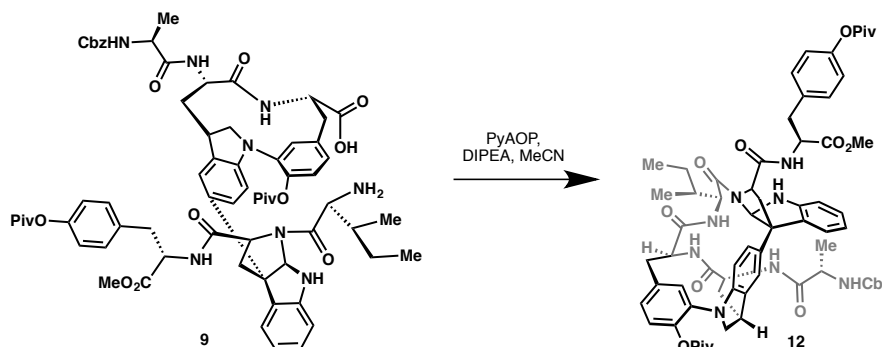

## Compound 12

A 24-mL syringe was charged with zwitterion **9** (123 mg, 0.100 mmol, 1 equiv) in MeCN (20 mL). A separate 24-mL syringe was charged with PyAOP (104 mg, 0.200 mmol, 2.00 equiv) in MeCN (20 mL). A 500-mL round-bottom flask fitted with a septum was charged with DIPEA (0.17 mL, 1.0 mmol, 10 equiv) in MeCN (150 mL). The flask was warmed to 60 °C; then, the two aforementioned syringes were mounted in a 2-barrel syringe pump and concurrently added to the DIPEA solution over 16 h. After complete addition, LCMS analysis showed complete consumption of starting material. At this time, the reaction was cooled to rt, DMSO (1 mL) was added, and the excess solvent removed *via* rotary evaporation. The resultant DMSO solution was purified *via* preparative HPLC (C18, 55-75% MeCN/H<sub>2</sub>O with 0.1% HCO<sub>2</sub>H over 12 min; product elutes at 8.9 min). Fractions containing the desired product were combined and lyophilized to yield **12** (13 mg, 11%) as a white foam:

$$[\alpha]_{\text{D}}^{24.7} = -212.2 \text{ (} c = 1.0, \text{CHCl}_3\text{)};$$



NMR: Due to rotamerism (see spectra), the NMR of this compound was not assigned.

HRMS: Calc'd for C<sub>68</sub>H<sub>79</sub>N<sub>8</sub>O<sub>13</sub>, [M+H]<sup>+</sup>, 1215.5761; found, 1215.5741.

LC/low-resolution MS trace (254 nm absorption in top lane; SIR in bottom lane):

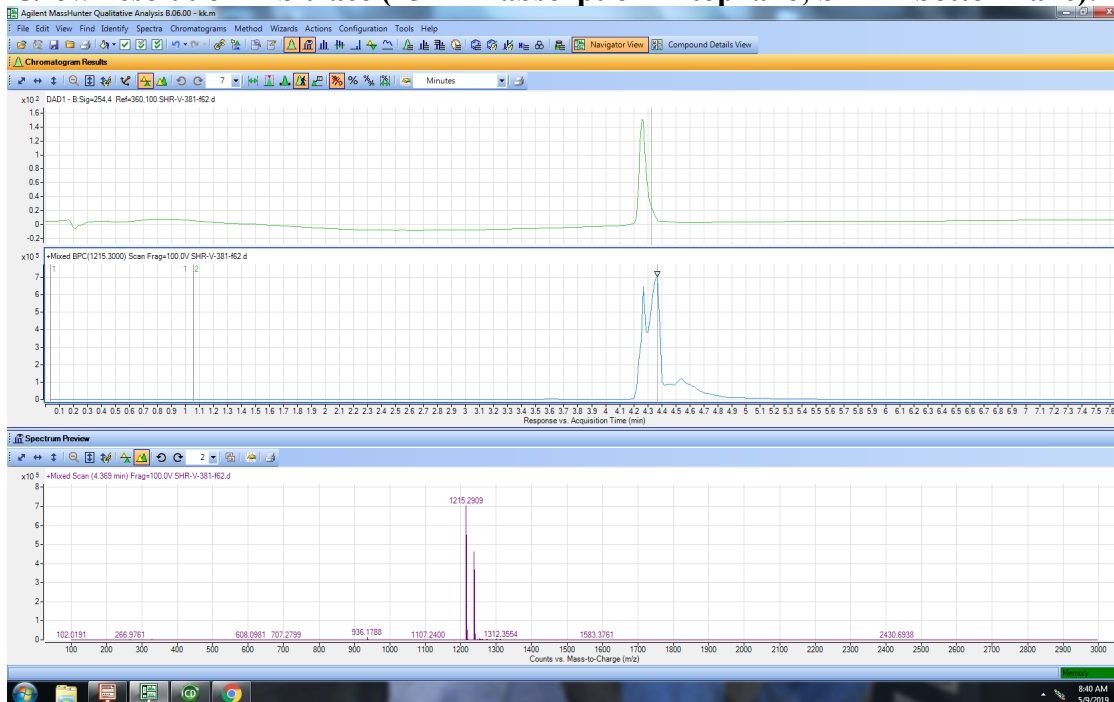

Table S2, optimization of macrolactamization

**Standard conditions:** base = DIPEA; solvent = MeCN; coupling reagent = PyAOP; final concentration = 0.5 mM; addition method = dual slow addition of PyAOP and substrate

| Entry                      | Difference from standard conditions | Yield 12 (%) | Major side product |
|----------------------------|-------------------------------------|--------------|--------------------|
| <i>standard conditions</i> | -                                   | 11           | -                  |
| 1                          | base = collidine                    | 8            | -                  |
| 2                          | base = NMM                          | 8            | -                  |
| 3                          | solvent = DMF                       | -            | dimethylamide      |
| 4                          | solvent = DMA                       | -            | dimethylamide      |
| 5                          | solvent = DMSO                      | -            | -                  |
| 6                          | coupling reagent = HATU             | 3            | guanadinylation    |
| 7                          | coupling reagent = PyOxim           | 9            | -                  |
| 8                          | coupling reagent = EDCI/DMAP        | <1           | -                  |
| 9                          | coupling reagent = T3P              | <1           | -                  |
| 10                         | final concentration = 0.05 mM       | 9            | -                  |
| 11                         | final concentration = 5 mM          | 2            | -                  |
| 12                         | mix reagents all at start           | -            | -                  |

|    |                                  |   |   |
|----|----------------------------------|---|---|
| 13 | Slow add'n of substrate to PyAOP | - | - |
| 14 | 8 hour dual add'n                | 7 | - |

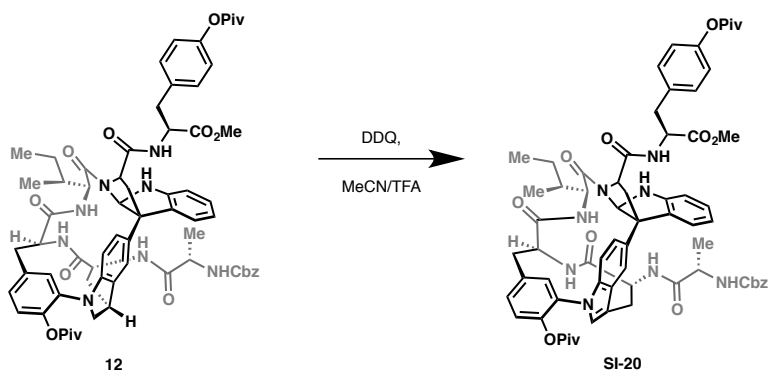

### SI-20

A 0.5 mL microwave vial was charged with **12** (2.4 mg, 0.0020 mmol, 1 equiv), MeCN (0.15 mL) and TFA (0.15 mL). DDQ (4.5 mg, .020 mmol, 10 equiv) was added, and the microwave vial was sealed and heated to 55 °C in the microwave for 5 min. The mixture was concentrated *via* rotary evaporation, and the residue taken up in DMSO (0.7 mL) and purified *via* preparative HPLC (C18, 55-75% MeCN/H<sub>2</sub>O with 0.1% HCO<sub>2</sub>H over 12 min; product elutes at 3.1 min) to yield **SI-20** (1.1 mg, 42%) as a yellow foam:

$[\alpha]_D^{24} = -37.2$  ( $c = 0.1$ , CHCl<sub>3</sub>);

**NMR:** Due to rotamerism (see spectra), the NMR of this compound was not assigned.

**HRMS:** Calc'd for C<sub>68</sub>H<sub>77</sub>N<sub>8</sub>O<sub>13</sub>, [M+H]<sup>+</sup>, 1213.5605; found, 1213.5602.

**LC/low-resolution MS trace (254 nm absorption in top lane; SIR in bottom lane):**

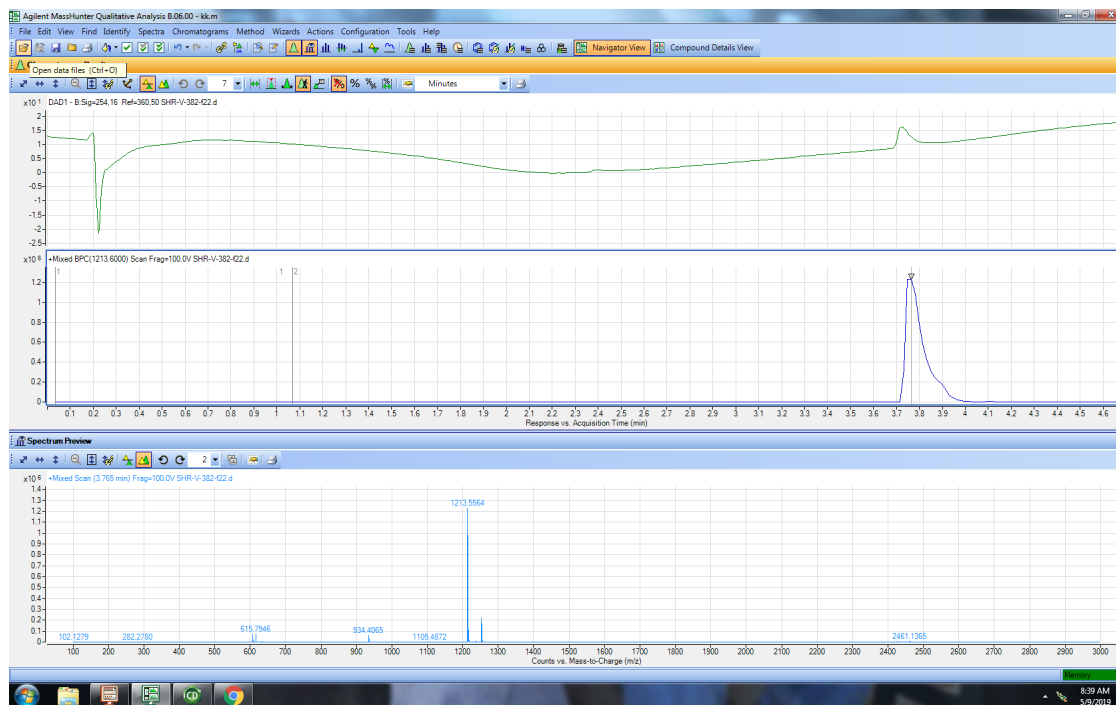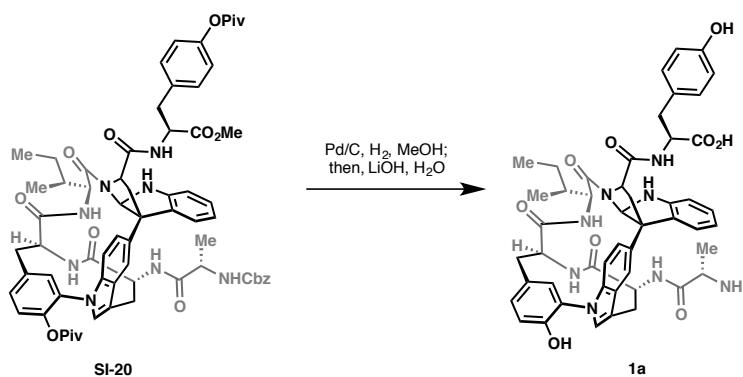

### Synthetic tryptorubin A (1a):

A solution of SI-20 (1.1 mg, 0.91  $\mu\text{mol}$ ) in MeOH (0.5 mL) was sparged with Ar for 15 min. Then, Pd/C (10% w/w, *ca.* 1 mg) was added. The reaction atmosphere was replaced with H<sub>2</sub> (1 atm) and the mixture vigorously stirred for 12 h at rt. The atmosphere was replaced back to Ar; then, aqueous LiOH (1 M, 0.2 mL, 0.2 mmol) was added, and the mixture stirred at rt for an additional 2 h. The mixture was filtered and the filtrate purified *via* preparative HPLC (C18, 15-35% MeCN/H<sub>2</sub>O with 0.1% HCO<sub>2</sub>H over 12 min; product elutes at 3.9 min). Fractions containing desired product were combined and lyophilized, and the resultant white foam was taken up in H<sub>2</sub>O/MeCN/AcOH (100:100:1) and lyophilized again to yield the acetate salt of **1a** (0.7 mg, 86%) as a white foam:

$$[\alpha]_{\text{D}}^{25.9} = 4.7 (c = 0.6, \text{MeOH});$$

NMR: See tabulated NMR data, page 54.

**HRMS:** Calc'd for C<sub>49</sub>H<sub>53</sub>N<sub>8</sub>O<sub>9</sub> ([M+H]<sup>+</sup>), 897.3936; found, 897.3933.

**LC/low-resolution MS trace:** See *LCMS co-injection of natural and synthetic tryptorubin A*, page 67.

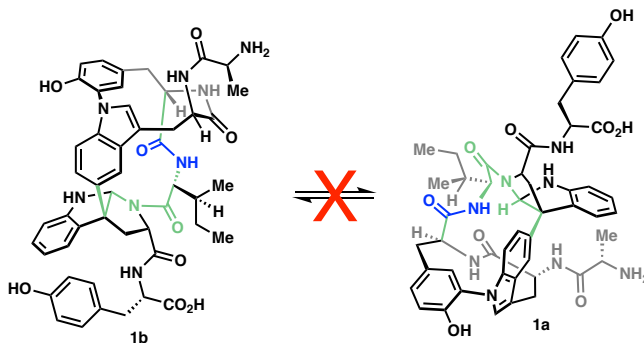

**Attempted thermal interconversion of 1a and 1b:**

Substrate **1a** or **1b** (*ca.* 0.05 mg) was dissolved in DMSO-d<sub>6</sub> (0.15 mL) and heated to 120 °C for 24 h. The solution was cooled to rt and analyzed by <sup>1</sup>H NMR. In both cases, significant decomposition to unknown species occurred, but no evidence of interconversion to the other atropisomer (i.e., **1a** to **1b**, or **1b** to **1a**, respectively) was observed.

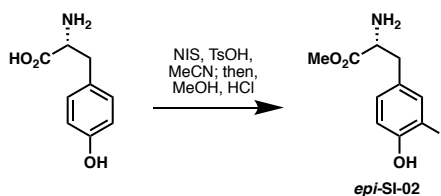

**Epi-SI-02**

*NOTE: There exist many literature precedents for preparation of this compound via reaction of Tyrosine with I<sub>2</sub> in concentrated aqueous NH<sub>4</sub>OH. However, in our hands, this preparation resulted in generation of explosive solid NI<sub>3</sub>, and due to safety risks we thus adopted the following procedure.*

To a solution of *D*-Tyrosine (18.1 g, 100 mmol, 1 equiv) and toluene sulfonic acid hydrate (38.0 g, 200 mmol, 2 equiv) in MeCN (1.0 L) was added NIS (23.6 g, 105 mmol, 1.05 equiv) in six portions over two hours. The mixture was stirred at rt for 18 h, and then concentrated *via* rotary evaporation to a yellow oil. A separate flask was charged with MeOH (200 mL), and to this MeOH was added AcCl (14.3 mL, 200 mmol, 2 equiv) dropwise. The resultant methanolic HCl was added *via* cannula to the crude iodo-tryptophan, and the solution stirred at reflux for 2 h. The mixture was concentrated *via* rotary evaporation, and the residue partitioned between aqueous sodium carbonate (saturated, 300 mL) and EtOAc (300 mL). The aqueous layer was extracted with additional EtOAc (5 X 300 mL), and the combined organics were dried (MgSO<sub>4</sub>) and concentrated. The residue was purified *via* column chromatography (SiO<sub>2</sub>, 0-6%

MeOH/DCM with 0.5% Et<sub>3</sub>N) to yield the title product as a yellow foam (25.7 g, 84%). Spectral data matched previous literature<sup>32</sup>; <sup>1</sup>H NMR data are reported here for convenience:

<sup>1</sup>H NMR: (400 MHz, CD<sub>3</sub>OD) δ 7.62 (d, *J* = 2.1 Hz, 1H), 7.09 (dd, *J* = 8.1, 2.0 Hz, 1H), 6.84 (d, *J* = 8.2 Hz, 1H), 4.27 (t, *J* = 6.7 Hz, 1H), 3.84 (s, 3H), 3.16 (dd, *J* = 14.6, 6.0 Hz, 1H), 3.05 (dd, *J* = 14.6, 7.6 Hz, 1H).

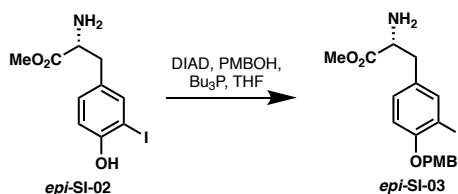

### *Epi-SI-03*

This compound was prepared in a manner identical to **SI-03**, starting from *Epi-SI-02* (25.7 g, 84 mmol), and yielding the title product (30.8 g, 83%) as a yellow foam:

$[\alpha]_D^{20.0} = 6.8$  (*c* = 1.0, CHCl<sub>3</sub>);

<sup>1</sup>H NMR (600 MHz, CD<sub>3</sub>OD): δ 7.63 (d, *J* = 2.2 Hz, 1H), 7.43 – 7.40 (m, 2H), 7.15 (dd, *J* = 8.4, 2.2 Hz, 1H), 6.96 – 6.92 (m, 3H), 5.07 (s, 2H), 4.60 (s, 1H), 3.81 (s, 3H), 3.68 (s, 3H), 2.92 (dd, *J* = 13.7, 6.3 Hz, 1H), 2.86 (dd, *J* = 13.7, 6.8 Hz, 1H).

<sup>13</sup>C NMR (151 MHz, CD<sub>3</sub>OD): δ 176.0, 161.0, 157.9, 141.2, 132.7, 131.5, 130.2, 130.0, 114.9, 114.1, 87.4, 71.9, 56.6, 55.7, 52.4, 40.2.

HRMS: Calc'd for C<sub>18</sub>H<sub>21</sub>INO<sub>4</sub>, [M+H]<sup>+</sup>, 442.0510; found, 442.0516.

*R<sub>f</sub>* = 0.32 (Hex:EtOAc = 1:5; UV, Ce<sub>2</sub>(SO<sub>4</sub>)<sub>3</sub> in phosphomolybdic acid)

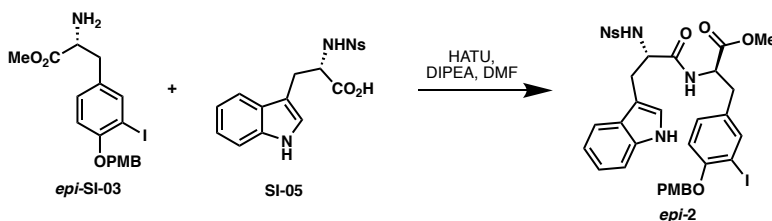

### *Epi-2*

This compound was prepared in a manner identical to compound **2**, starting from *Epi-SI-03* (32.8 g, 69.7 mmol), and yielding the title product (49.9 g, 88%) as a yellow foam:

<sup>32</sup> Chiarello, J. and Joullie M.M. *Syn. Comm.*, **1988**, *18*, 2211.

$[\alpha]_D^{20.0} = -17.0$  ( $c = 1.0$ ,  $\text{CHCl}_3$ );

$^1\text{H NMR}$  (600 MHz,  $\text{CDCl}_3$ )  $\delta$  8.06 (s, 1H), 7.80 (d,  $J = 7.4$  Hz, 1H), 7.57 (s, 1H), 7.43 (d,  $J = 7.7$  Hz, 1H), 7.39 – 7.31 (m, 4H), 7.20 – 7.14 (m, 2H), 7.12 (d,  $J = 8.1$  Hz, 1H), 7.07 (d,  $J = 8.5$  Hz, 1H), 7.02 (t,  $J = 7.6$  Hz, 1H), 6.96 (s, 1H), 6.89 (d,  $J = 8.4$  Hz, 2H), 6.82 – 6.76 (m, 2H), 6.04 (d,  $J = 4.0$  Hz, 1H), 4.98 (s, 2H), 4.90 (dt,  $J = 8.5, 5.5$  Hz, 1H), 4.11 (dt,  $J = 10.9, 4.5$  Hz, 1H), 3.80 (s, 3H), 3.72 (s, 3H), 3.44 (dd,  $J = 14.9, 4.7$  Hz, 1H), 3.09 (dd,  $J = 14.1, 5.5$  Hz, 1H), 2.99 (dd,  $J = 14.1, 5.5$  Hz, 1H), 2.91 (dd,  $J = 15.0, 10.6$  Hz, 1H).

$^{13}\text{C NMR}$  (151 MHz,  $\text{CDCl}_3$ )  $\delta$  171.4, 170.5, 159.4, 156.7, 146.2, 140.1, 136.4, 133.7, 132.7, 131.5, 131.0, 130.9, 130.0, 128.9, 128.7, 126.2, 125.6, 124.6, 122.2, 119.9, 118.49, 114.0, 113.0, 111.4, 108.9, 87.2, 70.9, 58.2, 55.4, 53.3, 52.6, 36.9, 29.0.

HRMS: Calc'd for  $\text{C}_{35}\text{H}_{34}\text{N}_4\text{O}_9\text{S}$ ,  $[\text{M}+\text{H}]^+$ , 813.1086; found, 813.1081.

R<sub>f</sub>: 0.55 (Hex:EtOAc = 1:1; UV,  $\text{Ce}_2(\text{SO}_4)_3$  in phosphomolybdic acid)

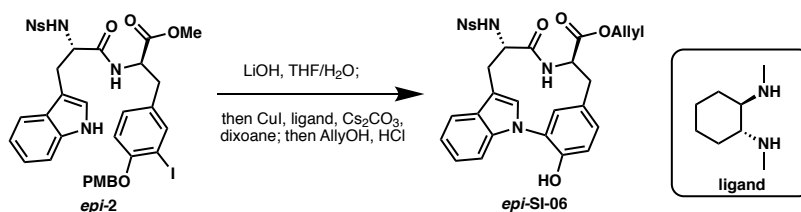

### **Epi-SI-06**

This compound was prepared in a manner identical to compound **SI-06**, starting from **Epi-2** (32.5 g, 40.0 mmol), and yielding the title product (15.1 g, 64%) as a yellow foam:

$[\alpha]_D^{22.5} = -223.0$  ( $c = 1.0$ ,  $\text{CHCl}_3$ );

$^1\text{H NMR}$  (600 MHz,  $\text{CDCl}_3$ )  $\delta$  8.20 (dd,  $J = 7.6, 1.6$  Hz, 1H), 7.91 (dd,  $J = 7.6, 1.5$  Hz, 1H), 7.83 – 7.75 (m, 2H), 7.40 – 7.36 (m, 1H), 7.33 – 7.30 (m, 1H), 7.25 – 7.20 (m, 2H), 6.90 (s, 2H), 6.39 (d,  $J = 10.1$  Hz, 1H), 6.33 (s, 1H), 6.28 (s, 1H), 6.09 (d,  $J = 9.3$  Hz, 1H), 5.83 (ddt,  $J = 16.5, 10.4, 5.8$  Hz, 1H), 5.75 (s, 1H), 5.27 (dd,  $J = 17.2, 1.5$  Hz, 1H), 5.21 (dd,  $J = 10.4, 1.3$  Hz, 1H), 4.49 (qd,  $J = 13.1, 5.8$  Hz, 2H), 4.35 (ddd,  $J = 12.0, 10.0, 2.1$  Hz, 1H), 4.15 (ddd,  $J = 12.9, 9.3, 3.7$  Hz, 1H), 3.18 (t,  $J = 12.5$  Hz, 1H), 2.86 (dd,  $J = 13.2, 3.6$  Hz, 1H), 2.72 (dd,  $J = 14.5, 2.1$  Hz, 1H), 2.33 (dd,  $J = 14.5, 11.8$  Hz, 1H).

$^{13}\text{C NMR}$  (151 MHz,  $\text{CDCl}_3$ )  $\delta$  170.7, 169.1, 150.9, 149.7, 147.8, 147.0, 134.8, 134.3, 133.9, 133.3, 131.4, 130.6, 129.4, 129.0, 128.9, 127.1, 125.7, 125.1, 123.7, 119.3, 119.1, 117.4, 116.6, 66.3, 58.7, 54.3, 35.7, 27.9.

HRMS: Calc'd for  $\text{C}_{29}\text{H}_{27}\text{N}_4\text{O}_8\text{S}$ ,  $[\text{M}+\text{H}]^+$ , 591.1544; found, 591.1565.

R<sub>f</sub>: 0.40 (Hex:EtOAc = 1:1; UV, Ce<sub>2</sub>(SO<sub>4</sub>)<sub>3</sub> in phosphomolybdic acid)

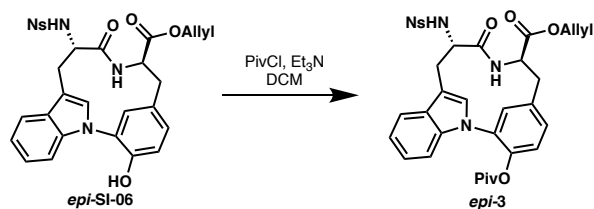

### *Epi-3*

This compound was prepared in a manner identical to compound **3**, starting from *Epi-SI-06* (15.1 g, 25.5 mmol), and yielding the title product (15.7 g, 91%) as a yellow foam:

$[\alpha]_D^{23.2} = -170.4$  ( $c = 1.0$ , CHCl<sub>3</sub>);

<sup>1</sup>H NMR (600 MHz, CDCl<sub>3</sub>)  $\delta$  8.21 (dd,  $J = 7.8, 1.4$  Hz, 1H), 7.90 (dd,  $J = 7.9, 1.4$  Hz, 1H), 7.82 (td,  $J = 7.7, 1.4$  Hz, 1H), 7.77 (td,  $J = 7.7, 1.5$  Hz, 1H), 7.50 – 7.43 (m, 1H), 7.36 – 7.30 (m, 1H), 7.22 – 7.12 (m, 2H), 7.06 – 6.99 (m, 2H), 6.51 (d,  $J = 10.0$  Hz, 1H), 6.36 (s, 1H), 6.14 (d,  $J = 9.3$  Hz, 1H), 5.90 (d,  $J = 2.0$  Hz, 1H), 5.82 (ddt,  $J = 17.2, 10.4, 5.8$  Hz, 1H), 5.26 (dd,  $J = 17.2, 1.4$  Hz, 1H), 5.21 (dd,  $J = 10.5, 1.2$  Hz, 1H), 4.48 (dtdd,  $J = 13.1, 11.7, 5.8, 1.4$  Hz, 2H), 4.36 (ddd,  $J = 12.0, 10.1, 2.0$  Hz, 1H), 4.19 – 4.11 (m, 1H), 3.18 (dd,  $J = 13.2, 11.9$  Hz, 1H), 2.86 (dd,  $J = 13.2, 3.6$  Hz, 1H), 2.78 (dd,  $J = 14.5, 2.1$  Hz, 1H), 2.40 (dd,  $J = 14.4, 11.8$  Hz, 1H), 1.33 (s, 9H).

<sup>13</sup>C NMR (151 MHz, CDCl<sub>3</sub>)  $\delta$  177.3, 170.7, 169.3, 150.5, 147.8, 146.3, 144.6, 136.3, 135.1, 134.8, 133.8, 133.8, 133.3, 131.4, 130.6, 128.9, 128.4, 125.6, 124.8, 123.2, 122.9, 119.2, 118.7, 116.9, 116.5, 66.4, 58.9, 54.0, 39.2, 35.6, 27.9, 27.3.

HRMS: Calc'd for C<sub>34</sub>H<sub>35</sub>N<sub>4</sub>O<sub>9</sub>S, [M+H]<sup>+</sup>, 675.2119; found, 675.2135.

R<sub>f</sub>: 0.58 (Hex:EtOAc = 1:1; UV, Ce<sub>2</sub>(SO<sub>4</sub>)<sub>3</sub> in phosphomolybdic acid)

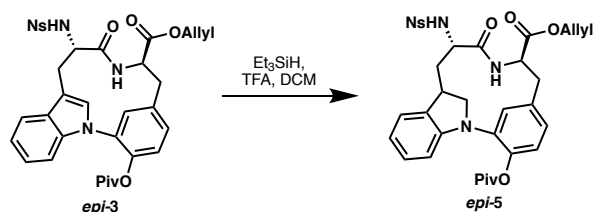

### *Epi-5*

This compound was prepared in a manner identical to compound **5**, starting from *Epi-3* (15.7 g, 23.3 mmol), and yielding the title product (12.8 g, 81%) as a yellow foam. The material yielded was homogeneous by TLC and LC-MS analysis, and was therefore assigned as a single diastereomer. The stereochemistry at the indoline C3 position could

not be assigned by NMR, but is assumed to (*R*) by analogy to derivative *epi-SI-21*, whose stereochemistry was determined *via* crystallography.

$$[\alpha]_D^{24.7} = -13.9 (c = 1.0, \text{CHCl}_3);$$

**NMR:** Due to rotamerism (see spectra), the NMR of this compound was not assigned.

**HRMS:** Calc'd for  $\text{C}_{34}\text{H}_{37}\text{N}_4\text{O}_9\text{S}$ ,  $[\text{M}+\text{H}]^+$ , 677.2276; found, 677.2279.

**LC/low-resolution MS trace (254 nm absorption in top lane; SIR in bottom lane):**

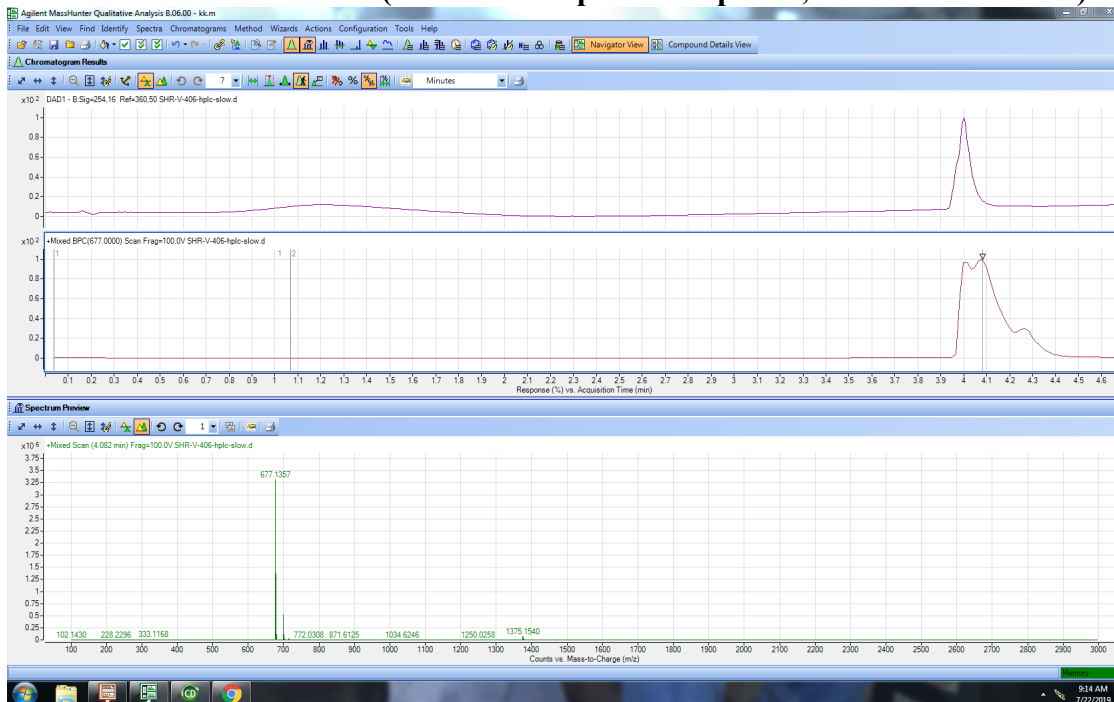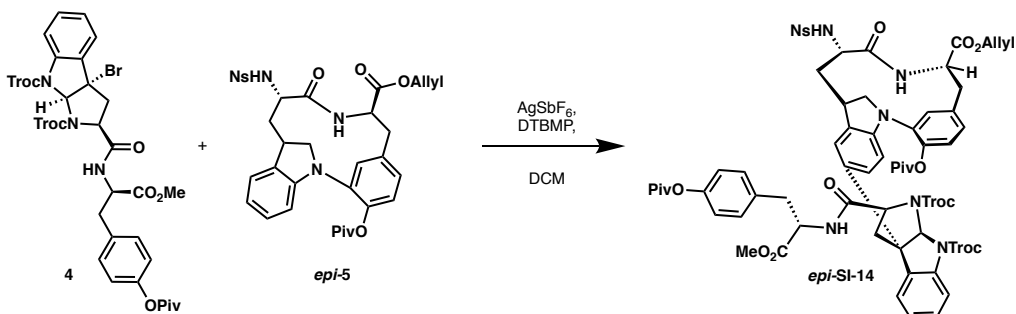

***Epi-SI-14***

This compound was prepared in a manner identical to compound **SI-14**, starting from *Epi-5* (5.36 g, 7.92 mmol), and yielding the title product (6.02 g, 51%) as a yellow foam:

$$[\alpha]_D^{24.1} = -2.1 (c = 1.0, \text{CHCl}_3);$$



NMR: Due to rotamerism (see spectra), the NMR of this compound was not assigned.

HRMS: Calc'd for C<sub>66</sub>H<sub>68</sub>Cl<sub>6</sub>N<sub>7</sub>O<sub>18</sub>S, [M+H]<sup>+</sup>, 1488.2467; found, 1488.2429.

LC/low-resolution MS trace (254 nm absorption in top lane; SIR in bottom lane):

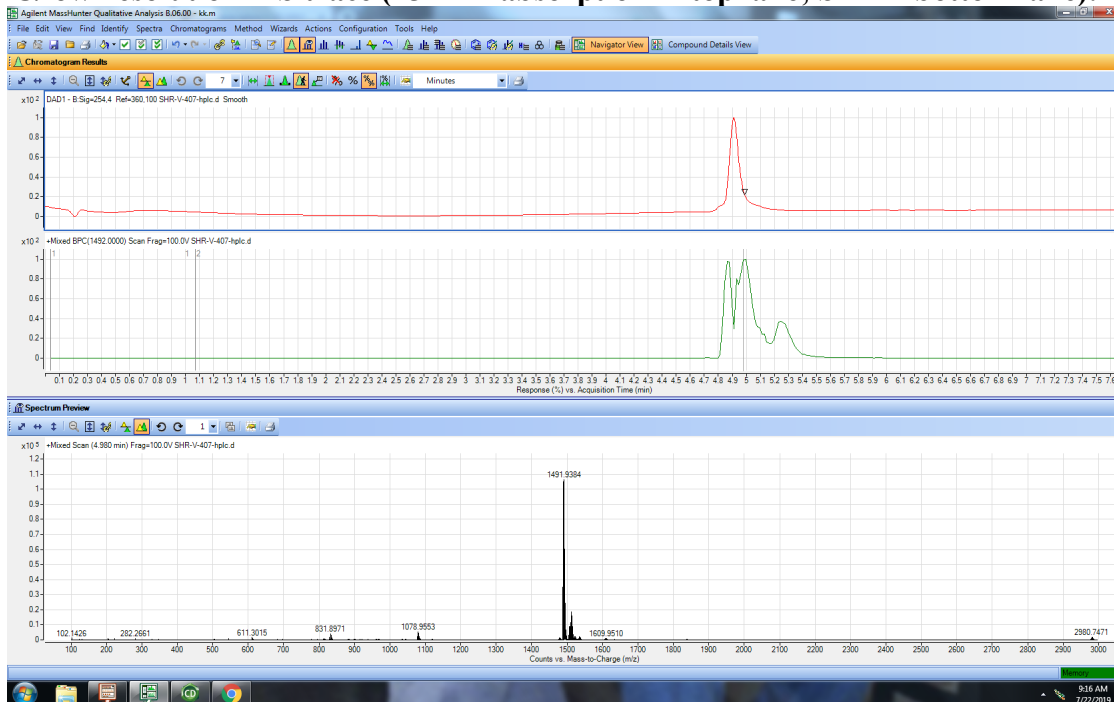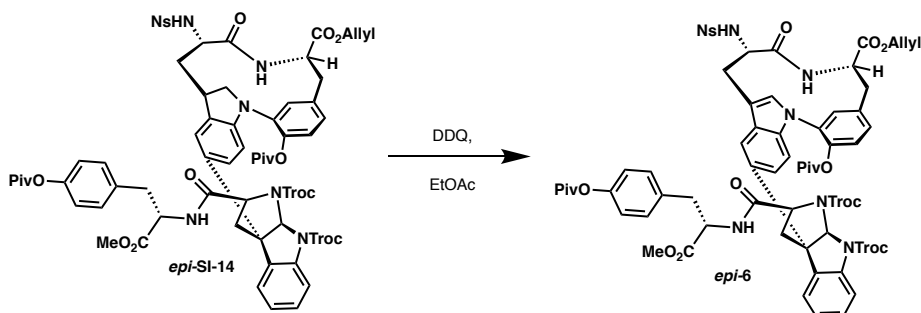

### *Epi*-6

This compound was prepared in a manner identical to compound **6**, starting from *Epi*-SI-14 (6.02 g, 4.04 mmol), and yielding the title product (4.81 g, 80%) as a red foam:

$[\alpha]_D^{20.9} = -43.7$  ( $c = 1.0$ , CHCl<sub>3</sub>);

<sup>1</sup>H NMR (600 MHz, CDCl<sub>3</sub>) δ 8.19 – 8.14 (m, 1H), 7.91 – 7.87 (m, 1H), 7.83 (d,  $J = 8.1$  Hz, 1H), 7.78 (tt,  $J = 7.5, 5.7$  Hz, 2H), 7.60 (d,  $J = 1.9$  Hz, 1H), 7.38 – 7.32 (m, 3H), 7.17 (t,  $J = 7.5$  Hz, 1H), 7.04 (dd,  $J = 8.3, 2.2$  Hz, 1H), 7.00 (d,  $J = 8.1$  Hz, 3H), 6.98 – 6.93 (m, 3H), 6.74 (s, 1H), 6.41 (s, 1H), 6.18 (d,  $J = 10.2$  Hz, 1H), 5.90 – 5.81 (m, 2H), 5.80

(d,  $J = 9.6$  Hz, 1H), 5.28 (dd,  $J = 17.2, 1.4$  Hz, 1H), 5.23 (dd,  $J = 10.4, 1.2$  Hz, 1H), 5.18 – 5.06 (m, 1H), 4.94 (dd,  $J = 9.2, 1.7$  Hz, 1H), 4.89 (d,  $J = 12.0$  Hz, 1H), 4.60 – 4.50 (m, 2H), 4.44 (ddd,  $J = 12.2, 10.2, 2.1$  Hz, 1H), 4.31 (s, 1H), 4.17 (ddd,  $J = 11.8, 9.7, 3.7$  Hz, 1H), 3.55 (s, 3H), 3.42 (d,  $J = 13.4$  Hz, 1H), 3.31 – 3.23 (m, 1H), 3.18 (t,  $J = 12.4$  Hz, 1H), 2.99 (dd,  $J = 13.0, 3.7$  Hz, 1H), 2.87 (dd,  $J = 14.4, 2.1$  Hz, 1H), 2.70 (dd,  $J = 13.7, 4.7$  Hz, 1H), 2.56 (dd,  $J = 14.4, 11.9$  Hz, 1H), 2.38 (dd,  $J = 13.7, 7.9$  Hz, 1H), 1.35 (s, 9H), 1.30 (s, 9H).

$^{13}\text{C}$  NMR (151 MHz,  $\text{CDCl}_3$ )  $\delta$  177.2, 177.1, 171.4, 170.3, 169.5, 169.3, 152.0, 150.4, 149.6, 147.7, 147.4, 144.5, 140.5, 135.9, 135.5, 135.3, 135.0, 134.2, 134.0, 133.4, 133.2, 131.4, 130.5, 130.1, 129.4, 128.9, 128.7, 126.0, 125.5, 125.5, 123.3, 123.1, 121.8, 119.4, 117.8, 117.4, 116.5, 116.0, 95.2, 95.0, 85.6, 75.6, 66.5, 62.5, 59.0, 54.1, 53.4, 52.3, 39.3, 39.2, 37.9, 35.8, 28.0, 27.3.

HRMS: Calc'd for  $\text{C}_{66}\text{H}_{66}\text{Cl}_6\text{N}_7\text{O}_{18}\text{S}$ ,  $[\text{M}+\text{H}]^+$ , 1486.2311; found, 1486.2341.

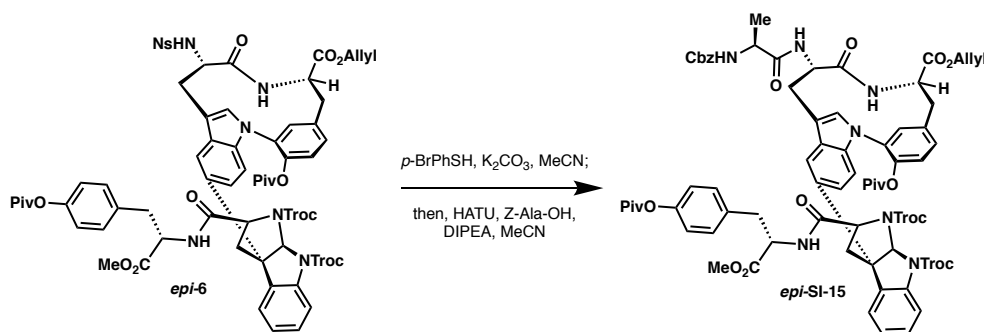

### *Epi-SI-15*

This compound was prepared in a manner identical to compound **SI-15**, starting from *Epi-6* (4.81 g, 3.23 mmol), and yielding the title product (2.14 g, 44%) as a white foam:

$[\alpha]_{\text{D}}^{24.3} = -61.6$  ( $c = 1.0$ ,  $\text{CHCl}_3$ );

NMR: Due to rotamerism (see spectra), the NMR of this compound was not assigned.

HRMS: Calc'd for  $\text{C}_{71}\text{H}_{74}\text{Cl}_6\text{N}_7\text{O}_{17}$ ,  $[\text{M}+\text{H}]^+$ , 1506.3267; found, 1506.3256.

LC/low-resolution MS trace (254 nm absorption in top lane; SIR in bottom lane):

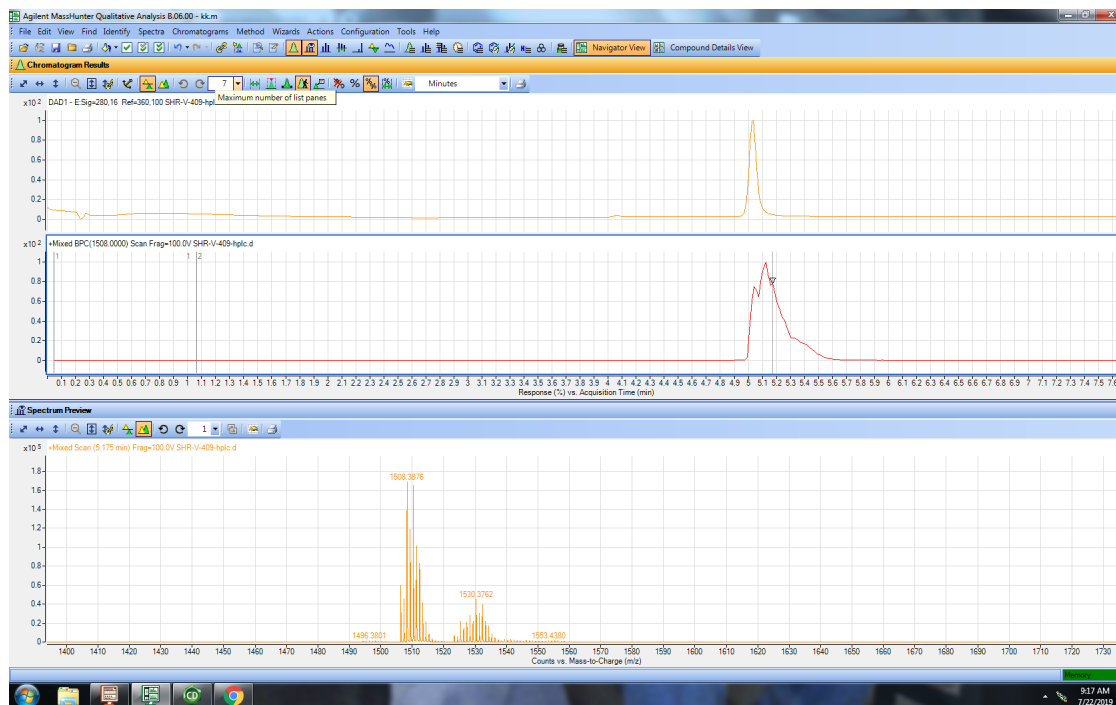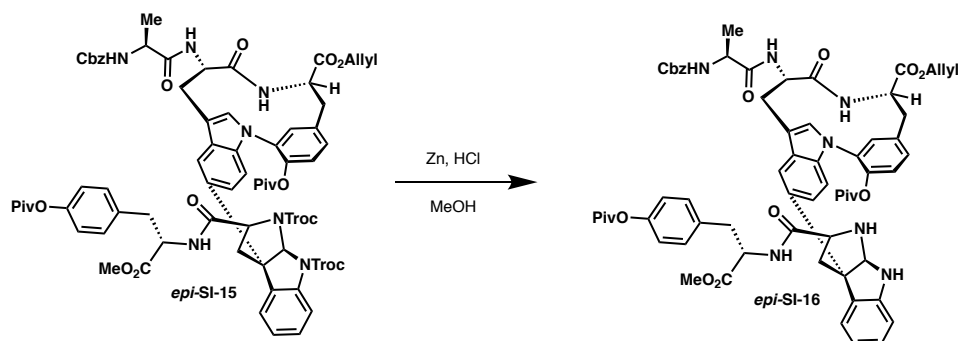

### *Epi-SI-16*

This compound was prepared in a manner identical to compound **SI-16**, starting from *Epi-SI-15* (2.14 g, 1.42 mmol), and yielding the title product (840 mg, 51%) as a white foam:

$$[\alpha]_{\text{D}}^{24.1} = -88.2 \quad (c = 0.6, \text{CHCl}_3);$$

**NMR:** Due to rotamerism (see spectra), the NMR of this compound was not assigned.

**HRMS:** Calc'd for  $\text{C}_{65}\text{H}_{72}\text{N}_7\text{O}_{13}$ ,  $[\text{M}+\text{H}]^+$ , 1158.5183; found, 1158.5188.

**LC/low-resolution MS trace (254 nm absorption in top lane; SIR in bottom lane):**

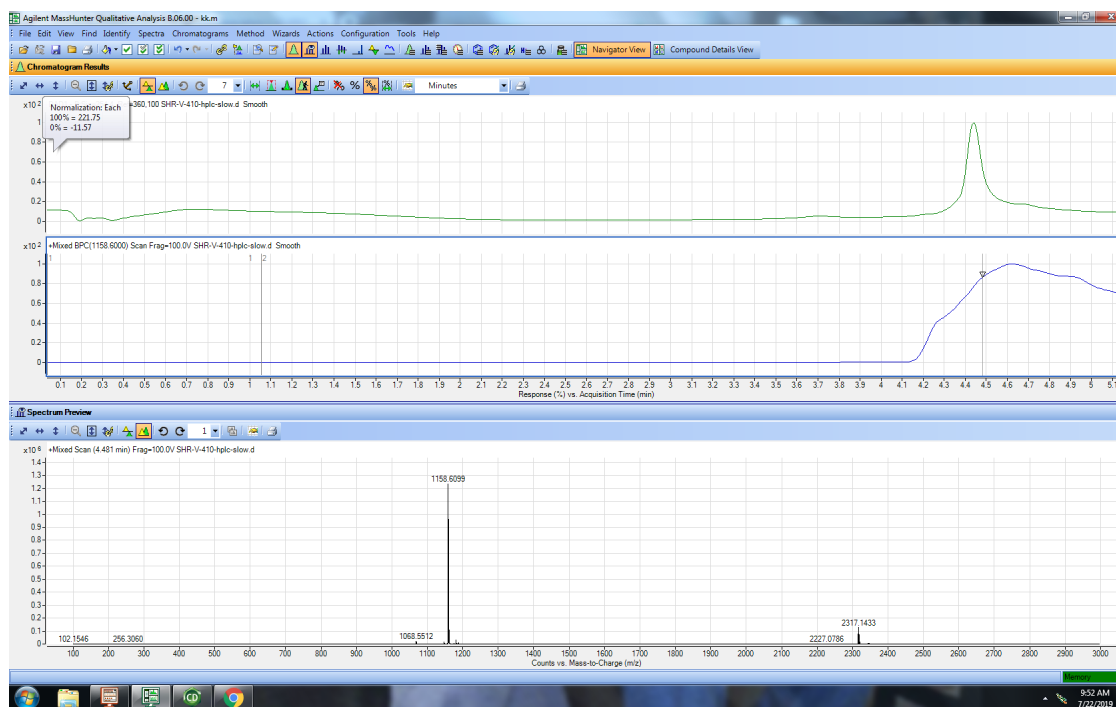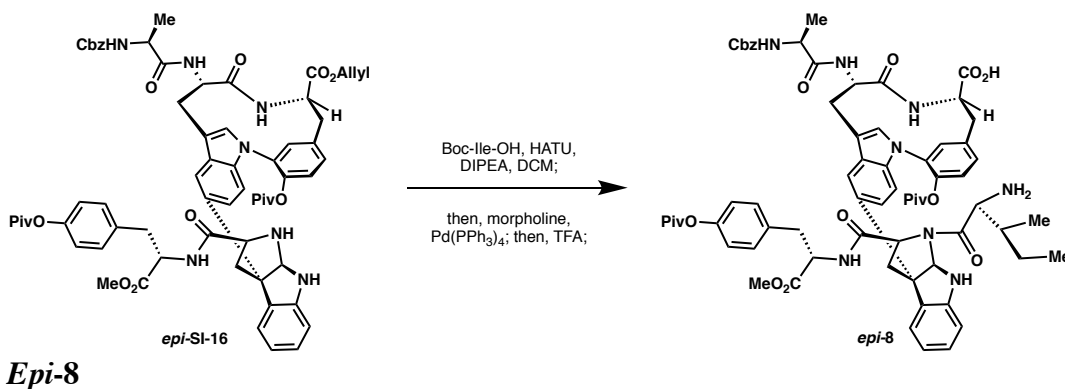

This compound was prepared in a manner identical to compound **8**, starting from **Epi-SI-16** (840 mg, 0.73 mmol), and yielding the title product (368 mg, 41%) as a white foam:

$[\alpha]_D^{20} = -62.7$  ( $c = 0.1$ ,  $\text{CHCl}_3$ );

**NMR**: Due to rotamerism (see spectra), the NMR of this compound was not assigned.

**HRMS**: Calc'd for  $\text{C}_{68}\text{H}_{79}\text{N}_8\text{O}_{14}$ ,  $[\text{M}+\text{H}]^+$ , 1231.5710; found, 1213.5714.

**LC/low-resolution MS trace (254 nm absorption in top lane; SIR in bottom lane):**

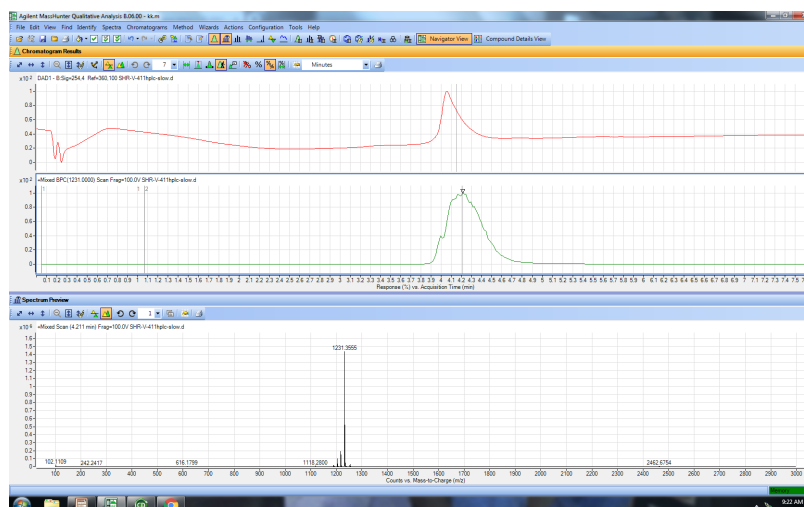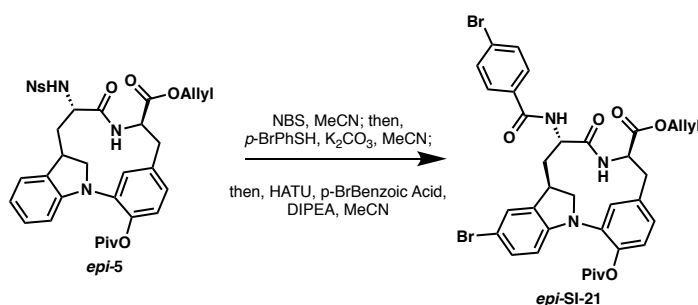

### ***epi-SI-21***

*(Prepared for purposes of X-ray crystallographic characterization)*

To a solution of ***epi-5*** (68 mg, 0.10 mmol, 1 equiv) in MeCN (1 mL) was added *N*-bromosuccinimide (18 mg, 0.10 mmol, 1.0 equiv). The mixture was stirred at rt for 15 min, at which time LC/MS analysis showed complete consumption of starting material.

To this solution was sequentially added 4-bromothiophenol (95 mg, 0.50 mmol, 5.0 equiv) and K<sub>2</sub>CO<sub>3</sub> (69 mg, 0.50 mmol, 5.0 equiv), and the mixture was stirred at rt for 30 min, at which time LC/MS analysis showed removal of the nosyl protecting group.

At this time, in a separate flask, 4-bromobenzoic acid (151 mg, 0.750 mmol, 7.50 equiv) and HATU (285 mg, 0.750 mmol, 7.50 equiv) were dissolved in MeCN (1 mL). DIPEA (0.52 mL, 3.0 mmol, 30 equiv) was then added, and the mixture stirred for 30 sec before being transferred quickly *via* syringe to the substrate/thiophenol-containing flask.

The resultant reaction was stirred for 5 min, then filtered through a pad of cotton to remove solids. The filtrate was directly purified *via* preparative HPLC (C18, 75–95% MeCN/H<sub>2</sub>O with 0.1% HCO<sub>2</sub>H over 12 min; product elutes at 6.5 min), to yield ***epi-SI-21*** (15 mg, 20%) as a white foam. Crystals suitable for X-ray diffraction were prepared by dissolving the product in DCM (0.2 mL), diluting the solution with *n*-heptane (3 mL), and allowing the mixture to slowly evaporate until crystals were observed.

**X-ray crystallography:** Solved structure; see details on page 150.

$[\alpha]_{\text{D}}^{20} = -118.3$  ( $c = 1.0$ , DMSO);

**$^1\text{H}$  NMR (600 MHz, 1:1  $\text{CD}_3\text{OD}/\text{DMSO}-d_6$ ):**  $\delta$  7.84 (d,  $J = 8.5$  Hz, 2H), 7.71 (d,  $J = 8.2$  Hz, 2H), 7.64 – 7.50 (m, 1H), 7.39 (d,  $J = 8.1$  Hz, 1H), 7.17 (s, 1H), 7.10 (s, 2H), 6.77 (d,  $J = 8.4$  Hz, 1H), 5.89 (s, 1H), 5.31 (d,  $J = 17.6$  Hz, 1H), 5.14 (s, 1H), 4.63 (s, 2H), 4.27 – 4.06 (m, 2H), 3.65 (s, 1H), 3.22 (d,  $J = 11.1$  Hz, 1H), 3.11 (d,  $J = 12.6$  Hz, 1H), 2.74 (t,  $J = 12.5$  Hz, 1H), 2.46 (s, 1H), 2.05 (s, 1H), 1.41 (s, 9H).

**$^{13}\text{C}$  NMR (151 MHz, 1:1  $\text{CD}_3\text{OD}/\text{DMSO}-d_6$ ):** 177.8, 171.6, 171.0, 167.2, 150.8, 146.0, 145.5, 138.5, 138.2, 137.7, 134.6, 133.7, 133.63, 133.4, 132.6, 132.3, 130.9, 129.9, 126.4, 124.7, 118.8, 118.3, 114.7, 66.7, 64.1, 55.8, 52.0, 31.0, 38.6, 35.9, 27.9.

**HRMS:** Calc'd for  $\text{C}_{35}\text{H}_{36}\text{Br}_2\text{N}_3\text{O}_6$ ,  $[\text{M}+\text{H}]^+$ , 752.0965; found, 752.0963.

**LC/low-resolution MS trace (254 nm absorption in top lane; SIR in bottom lane):**

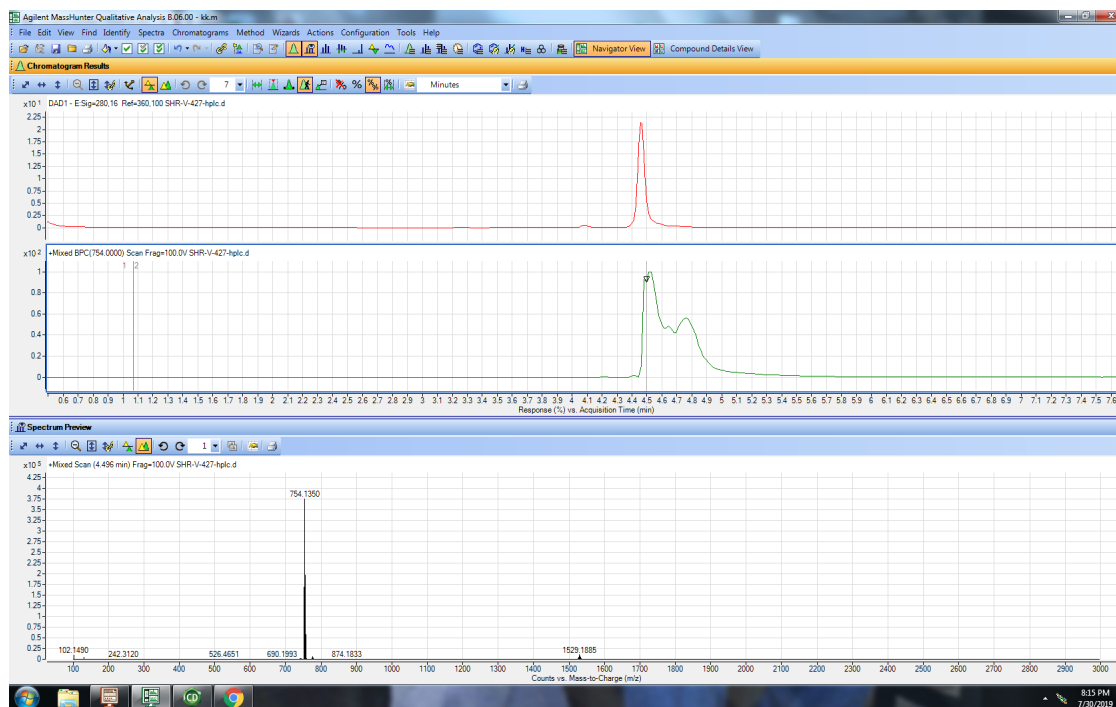

## Comparison of natural tryptorubin A, synthetic tryptorubin A (1a), and atrop-tryptorubin A (1b)

**Table S3, Reassigned chemical shifts for natural isolate (1a)**

Because of small referencing errors (relative to solvent residuals), as well as erroneous peak picking, some chemical shifts in tryptorubin's original isolation report were determined to be incorrect. Table S3 describes correctly re-referenced and re-picked chemical shifts for natural **1a**. All <sup>1</sup>H NMR multiplicities and integrations remain unchanged in assignment. The reassigned (right) chemical shifts were used in all subsequent NMR comparisons to synthetic materials.

### Natural product original assignment in MeOD

### Natural product reassignment in MeOD

| Position | ΔC    | ΔH         | Position | ΔC    | ΔH         | HMBC to              | nOe to     |
|----------|-------|------------|----------|-------|------------|----------------------|------------|
| 1        | 173.9 | -          | 1        | 177.8 | -          | -                    | -          |
| 2        | 57.3  | 4.39       | 2        | 57.3  | 4.39       | 8                    | 3          |
| 3        | 38.1  | 3.05; 2.86 | 3        | 38.8  | 3.05; 2.86 | 1, 2, 5              | 3, 2, 5    |
| 4        | 129.8 |            | 4        | 129.8 |            | -                    | -          |
| 5        | 130   | 6.92       | 5        | 131.7 | 6.92       | 3, 4                 | 3, 6, 9    |
| 6        | 115.9 | 6.4        | 6        | 115.9 | 6.40       | 5, 6, 7              | 5          |
| 7        | 155.8 | -          | 7        | 156.8 | -          | -                    | -          |
| 8        | 170.6 | -          | 8        | 173.4 | -          | -                    | -          |
| 9        | 63.1  | 4.70       | 9        | 65.3  | 4.70       | 8, 10                | 3, 10, 2NH |
| 10       | 38.9  | 3.2; 2.16  | 10       | 40.3  | 3.2; 2.16  | 8, 9, 11, 12, 13, 14 | 10, 42     |
| 11       | 59.9  | -          | 11       | 62.9  | -          | -                    | -          |
| 12       | 94.1  | 6.97       | 12       | 94.1  | 6.97       | 9, 11, 16            | 20, 40     |
| 13       | 137   | -          | 13       | 137   | -          | -                    | -          |
| 14       | 123.4 | 6.86       | 14       | 124.2 | 6.86       | 11, 16, 18           | 15, 40     |
| 15       | 118.5 | 6.77       | 15       | 120.6 | 6.77       | 16, 19               | -          |
| 16       | 128.2 | 7.18       | 16       | 129.4 | 7.18       | 15, 16, 18           | -          |

|    |       |            |    |       |            |                |            |
|----|-------|------------|----|-------|------------|----------------|------------|
| 17 | 112   | 6.89       | 17 | 112   | 6.89       | 15             | -          |
| 18 | 150.3 | -          | 18 | 150.3 | -          | -              | -          |
| 19 | 173.9 | -          | 19 | 176.1 | -          | -              | -          |
| 20 | 57.7  | 3.87       | 20 | 59.7  | 3.87       | 21             | 12, 21, 24 |
| 21 | 36.5  | 1.71       | 21 | 38    | 1.71       | -              | 24         |
| 22 | 24.3  | 1.30       | 22 | 30.7  | 1.30       | -              | 21         |
| 23 | 11.5  | 0.95       | 23 | 11.5  | 0.95       | -              | 21         |
| 24 | 16.3  | 1.00       | 24 | 16.3  | 1.00       | 20             | 21,22      |
| 25 | 170.2 | -          | 25 | 171.5 | -          | -              | -          |
| 26 | 51.6  | 4.13       | 26 | 53.5  | 4.13       | 25, 27         | 27, 20NH   |
| 27 | 33.4  | 3; 2.77    | 27 | 33.4  | 3; 2.77    | 25, 26, 28     | 26         |
| 28 | 125.9 | -          | 28 | 127.7 | -          | -              | -          |
| 29 | 131.8 | 5.94       | 29 | 131.8 | 5.94       | 27, 30, 31, 33 | 26NH       |
| 30 | 132.6 | -          | 30 | 133.8 | -          | -              | -          |
| 31 | 150.2 | -          | 31 | 150.2 | -          | -              | -          |
| 32 | 117.2 | 6.76       | 32 | 118.2 | 6.76       | -              | -          |
| 33 | 128.3 | 6.74       | 33 | 129.9 | 6.74       | -              | 27         |
| 34 | 169.0 | -          | 34 | 173.2 | -          | -              | -          |
| 35 | 53.7  | 4.38       | 35 | 53.7  | 4.38       | 34             | -          |
| 36 | 27.5  | 2.97; 2.85 | 36 | 27.5  | 2.97; 2.85 | 37, 38         | -          |
| 37 | 120.8 | -          | 37 | 122.9 | -          | -              | -          |
| 38 | 147.7 | 6.83       | 38 | 147.7 | 6.83       | 39, 40, 44     | 35         |
| 39 | 139.1 | -          | 39 | 140.2 | -          | -              | -          |
| 40 | 123.6 | 7.44       | 40 | 123.6 | 7.44       | 42             | 36, 12     |
| 41 | 136.1 | -          | 41 | 136.1 | -          | -              | -          |
| 42 | 123.3 | 7.44       | 42 | 123.3 | 7.44       | 44             | 10, 9      |
| 43 | 116.0 | 7.17       | 43 | 117.2 | 7.17       | 39, 41         | 42         |
| 44 | 154.7 | -          | 44 | 154.7 | -          | -              | -          |



|    |       |      |
|----|-------|------|
| 45 | 176.4 | -    |
| 46 | 51.0  | 3.49 |
| 47 | 20.6  | 1.35 |

|    |       |      |        |    |
|----|-------|------|--------|----|
| 45 | 177.1 | -    | -      | -  |
| 46 | 51    | 3.45 | -      | -  |
| 47 | 21.1  | 1.25 | 45, 46 | 46 |

**Table S4, Comparison of  $^1\text{H}$  and  $^{13}\text{C}$  shifts of natural isolate vs. *atrop*-tryptorubin A (1b)**

| Natural Isolate |                  |                  | Synthetic 1b |                  |                  |                |                        |                        |
|-----------------|------------------|------------------|--------------|------------------|------------------|----------------|------------------------|------------------------|
| Position        | $\Delta\text{C}$ | $\Delta\text{H}$ | Position     | $\Delta\text{C}$ | $\Delta\text{H}$ | multiplicity   | $\Delta\Delta\text{H}$ | $\Delta\Delta\text{C}$ |
| 1               | 177.8            | -                | 1            | 174.9            | -                | -              | -                      | 2.9                    |
| 2               | 57.3             | 4.39             | 2            | 57               | 4.43             | m              | 0.04                   | 0.3                    |
| 3               | 38.8             | 3.05; 2.86       | 3            | 40.4             | 3.04; 2.62       | m              | 0.01; 0.14             | 1.6                    |
| 4               | 129.8            | -                | 4            | 127.5            | -                | -              | -                      | 2.3                    |
| 5               | 131.7            | 6.92             | 5            | 131.7            | 6.65             | d, $J=8.1$     | 0.27                   | 0                      |
| 6               | 115.9            | 6.40             | 6            | 115.9            | 6.29             | d, $J=8.0$     | 0.11                   | 0                      |
| 7               | 156.8            | -                | 7            | 161.3            | -                | -              | -                      | 4.5                    |
| 8               | 173.4            | -                | 8            | 174              | -                | -              | -                      | 0.6                    |
| 9               | 65.3             | 4.70             | 9            | 66.8             | 4.97             | m              | 0.27                   | 1.5                    |
| 10              | 40.3             | 3.20; 2.16       | 10           | 43.4             | 3.12; 2.24       | m              | 0.08; 0.08             | 3.1                    |
| 11              | 62.9             | -                | 11           | 63.8             | -                | -              | -                      | 0.9                    |
| 12              | 94.1             | 6.97             | 12           | 91.6             | 6.24             | m              | 0.73                   | 2.5                    |
| 13              | 137.0            | -                | 13           | 139.1            | -                | -              | -                      | 2.1                    |
| 14              | 124.2            | 6.86             | 14           | 124.8            | 7.05             | m              | 0.19                   | 0.6                    |
| 15              | 120.6            | 6.77             | 15           | 121.3            | 6.93             | m              | 0.16                   | 0.7                    |
| 16              | 129.4            | 7.18             | 16           | 129.8            | 7.26             | app t, $J=7.8$ | 0.08                   | 0.4                    |
| 17              | 112.0            | 6.89             | 17           | 112.7            | 6.96             | d, $J=8.4$     | 0.07                   | 0.7                    |
| 18              | 150.3            | -                | 18           | 149.8            | -                | -              | -                      | 0.5                    |
| 19              | 176.1            | -                | 19           | 176.2            | -                | -              | -                      | 0.1                    |
| 20              | 59.7             | 3.87             | 20           | 56.9             | 4.01             | m              | 0.14                   | 2.8                    |
| 21              | 38.0             | 1.71             | 21           | 37.5             | 1.81             | m              | 0.10                   | 0.5                    |
| 22              | 30.7             | 1.30             | 22           | 26.3             | 1.13; 1.57       | m              | 0.27; 0.17             | 4.4                    |

|    |       |            |    |       |            |              |            |      |
|----|-------|------------|----|-------|------------|--------------|------------|------|
| 23 | 11.5  | 0.95       | 23 | 10.8  | 0.88       | t, $J = 7.3$ | 0.07       | 0.7  |
| 24 | 16.3  | 1.00       | 24 | 16.4  | 1.01       | d, $J = 6.8$ | 0.01       | 0.1  |
| 25 | 171.5 | -          | 25 | 172.9 | -          | -            | -          | 1.4  |
| 26 | 53.5  | 4.13       | 26 | 53.8  | 3.95       | d, $J = 7.9$ | 0.18       | 0.3  |
| 27 | 33.4  | 3.00; 2.77 | 27 | 34.4  | 2.83; 2.55 | m            | 0.17; 0.22 | 1    |
| 28 | 127.7 | -          | 28 | 120.5 | -          | -            | -          | 7.2  |
| 29 | 131.8 | 5.94       | 29 | 129.9 | 6.25       | s            | 0.31       | 1.9  |
| 30 | 133.8 | -          | 30 | 136.8 | -          | -            | -          | 3    |
| 31 | 150.2 | -          | 31 | 156.6 | -          | -            | -          | 6.4  |
| 32 | 118.2 | 6.76       | 32 | 122.3 | 6.60       | d, $J = 8.2$ | 0.16       | 4.1  |
| 33 | 129.9 | 6.74       | 33 | 129.6 | 6.52       | d, $J = 8.4$ | 0.22       | 0.3  |
| 34 | 173.2 | -          | 34 | 170.2 | -          | -            | -          | 3    |
| 35 | 53.7  | 4.38       | 35 | 57.1  | 4.19       | s            | 0.19       | 3.4  |
| 36 | 27.5  | 2.97; 2.85 | 36 | 23.7  | 3.41; 2.83 | m            | 0.44; 0.02 | 3.8  |
| 37 | 122.9 | -          | 37 | 131.4 | -          | -            | -          | 8.5  |
| 38 | 147.7 | 6.83       | 38 | 145.5 | 7.07       | m            | 0.24       | 2.2  |
| 39 | 140.2 | -          | 39 | 152.5 | -          | -            | -          | 12.3 |
| 40 | 123.6 | 7.44       | 40 | 117.7 | 7.15       | s            | 0.29       | 5.9  |
| 41 | 136.1 | -          | 41 | 139.2 | -          | -            | -          | 3.1  |
| 42 | 123.3 | 7.44       | 42 | 118.4 | 7.33       | d, $J = 8.3$ | 0.11       | 4.9  |
| 43 | 117.2 | 7.17       | 43 | 127.7 | 7.04       | m            | 0.13       | 10.5 |
| 44 | 154.7 | -          | 44 | 150   | -          | -            | -          | 4.7  |
| 45 | 177.1 | -          | 45 | 177.7 | -          | -            | -          | 0.6  |
| 46 | 51    | 3.45       | 46 | 50.6  | 3.44       | m            | 0.01       | 0.4  |
| 47 | 21.1  | 1.25       | 47 | 19.9  | 0.95       | d, $J = 6.9$ | 0.30       | 1.2  |

**Table S5, Comparison of <sup>1</sup>H and <sup>13</sup>C shifts of natural isolate vs. synthetic tryptorubin A (1a)**

| Natural isolate |       |            | Synthetic 1a |       |            |                   |         |     |
|-----------------|-------|------------|--------------|-------|------------|-------------------|---------|-----|
| Position        | ΔC    | ΔH         | Position     | ΔC    | ΔH         | multiplicity      | ΔΔH     | ΔΔC |
| 1               | 177.8 | -          | 1            | 177.7 | -          | -                 | -       | 0.1 |
| 2               | 57.3  | 4.39       | 2            | 57.1  | 4.37       | m                 | 0.02    | 0.2 |
| 3               | 38.8  | 3.05; 2.86 | 3            | 38.8  | 3.05; 2.82 | m                 | 0; 0.04 | 0   |
| 4               | 129.8 | -          | 4            | 129.7 | -          | -                 | -       | 0.1 |
| 5               | 131.7 | 6.92       | 5            | 131.6 | 6.93       | d, <i>J</i> = 7.8 | 0.01    | 0.1 |
| 6               | 115.9 | 6.40       | 6            | 116.0 | 6.40       | d, <i>J</i> = 7.9 | 0       | 0.1 |
| 7               | 156.8 | -          | 7            | 157   | -          | -                 | -       | 0.2 |
| 8               | 173.4 | -          | 8            | 173.6 | -          | -                 | -       | 0.2 |
| 9               | 65.3  | 4.70       | 9            | 65.3  | 4.70       | m                 | 0       | 0   |
| 10              | 40.3  | 3.20; 2.16 | 10           | 40.4  | 3.20; 2.15 | m                 | 0; 0.01 | 0.1 |
| 11              | 62.9  | -          | 11           | 62.9  | -          | -                 | -       | 0   |
| 12              | 94.1  | 6.97       | 12           | 93.8  | 6.99       | m                 | 0.02    | 0.3 |
| 13              | 137.0 | -          | 13           | 137.3 | -          | -                 | -       | 0.3 |
| 14              | 129.4 | 7.18       | 14           | 129.3 | 7.18       | m                 | 0       | 0.1 |
| 15              | 124.2 | 6.86       | 15           | 124.0 | 6.86       | m                 | 0       | 0.2 |
| 16              | 120.6 | 6.77       | 16           | 120.5 | 6.78       | m                 | 0.01    | 0.1 |
| 17              | 112.0 | 6.89       | 17           | 111.9 | 6.87       | m                 | 0.02    | 0.1 |
| 18              | 150.3 | -          | 18           | 150.2 | -          | -                 | -       | 0.1 |
| 19              | 176.1 | -          | 19           | 176.2 | -          | -                 | -       | 0.1 |
| 20              | 59.7  | 3.87       | 20           | 59.7  | 3.88       | d, <i>J</i> = 9.0 | 0.01    | 0   |
| 21              | 38.0  | 1.71       | 21           | 38.0  | 1.70       | m                 | 0.01    | 0   |
| 22              | 30.7  | 1.30       | 22           | 26.8  | 1.24       | m                 | 0.06    | 3.9 |
| 23              | 11.5  | 0.95       | 23           | 11.3  | 0.95       | app m             | 0       | 0.2 |
| 24              | 16.3  | 1.00       | 24           | 16.2  | 1.00       | d, <i>J</i> = 6.5 | 0       | 0.1 |

|    |       |            |    |       |            |                  |            |     |
|----|-------|------------|----|-------|------------|------------------|------------|-----|
| 25 | 171.5 | -          | 25 | 171.6 | -          | -                | -          | 0.1 |
| 26 | 53.5  | 4.13       | 26 | 53.6  | 4.14       | app d, $J = 8.0$ | 0.01       | 0.1 |
| 27 | 33.4  | 3.00; 2.77 | 27 | 33.3  | 2.98; 2.74 | m                | 0.02; 0.03 | 0.1 |
| 28 | 127.7 | -          | 28 | 124.3 | -          | -                | -          | 3.4 |
| 29 | 131.8 | 5.94       | 29 | 131.9 | 5.72       | s                | 0.22       | 0.1 |
| 30 | 133.8 | -          | 30 | 134.6 | -          | -                | -          | 0.8 |
| 31 | 150.2 | -          | 31 | 154.7 | -          | -                | -          | 4.5 |
| 32 | 118.2 | 6.76       | 32 | 120.6 | 6.70       | m                | 0.06       | 2.4 |
| 33 | 129.9 | 6.74       | 33 | 129.6 | 6.64       | m                | 0.10       | 0.3 |
| 34 | 173.2 | -          | 34 | 173.8 | -          | -                | -          | 0.6 |
| 35 | 53.7  | 4.38       | 35 | 53.5  | 4.37       | m                | 0.01       | 0.2 |
| 36 | 27.5  | 2.97; 2.85 | 36 | 27.5  | 2.95; 2.85 | m                | 0.02; 0    | 0   |
| 37 | 122.9 | -          | 37 | 122.0 | -          | -                | -          | 0.9 |
| 38 | 147.7 | 6.83       | 38 | 147.9 | 6.85       | m                | 0.02       | 0.2 |
| 39 | 140.2 | -          | 39 | 140.2 | -          | -                | -          | 0   |
| 40 | 123.6 | 7.44       | 40 | 124.8 | 7.40       | s                | 0.04       | 1.2 |
| 41 | 136.1 | -          | 41 | 136.0 | -          | -                | 0          | 0.1 |
| 42 | 123.3 | 7.44       | 42 | 124.0 | 7.38       | d, $J = 7.3$     | 0.06       | 0.7 |
| 43 | 117.2 | 7.17       | 43 | 117.1 | 7.20       | m                | 0.03       | 0.1 |
| 44 | 154.7 | -          | 44 | 154.8 | -          | -                | -          | 0.1 |
| 45 | 177.1 | -          | 45 | 177.8 | -          | -                | -          | 0.7 |
| 46 | 51.0  | 3.45       | 46 | 51.2  | 3.46       | m                | 0.01       | 0.2 |
| 47 | 21.1  | 1.25       | 47 | 21.4  | 1.22       | d, $J = 7.0$     | 0.03       | 0.3 |

**Table S6, Comparison of HMBC of natural isolate, synthetic tryptorubin A (1a), and *atrop*-tryptorubin A (1b)<sup>33</sup>**

| Position | Natural product<br>HMBC to | Synthetic 1a<br>HMBC to | Synthetic 1b<br>HMBC to |
|----------|----------------------------|-------------------------|-------------------------|
| H2       | C8                         | C3, C4, C8              |                         |
| H3       | C1, C2, C5                 | C1, C2, C5              | C1, C2, C5              |
| H5       | C3, C4                     | C3, C5, C7              | C3, C5, C7              |
| H6       | C5, C6, C7                 | C4, C6, C7              | C4, C6                  |
| H9       | C8, C10                    | C8, C10                 |                         |
| H10      | C8, C9, C11, C12, C13, C14 | C8, C11, C12, C41       | C8, C9, C13             |
| H12      | C9, C11, C16               | C9, C10, C11, C41       | C9, C10, C13            |
| H14      | C11, C16, C18              | C14, C18                |                         |
| H15      | C16, C19                   | C11, C13, C16           | C10, C17                |
| H16      | C15, C16, C18              | C13, C17                | C14, C18                |
| H17      | C15                        | C13, C15                | C15                     |
| H20      | C21                        | C21                     | C21, C25                |
| H21      | C20, C23, C24              | C20, C23, C24           | C22                     |
| H22      |                            |                         | C20, C21                |
| H23      | C21                        | C21, C22                | C21, C22                |
| H24      | C20                        | C20, C21, C22           | C19, C20, C21, C22      |
| H26      | C25, C27                   | C25, C27, C28           | C25, C28                |
| H27      | C25, C26, C28              | C25, C26, C28           | C25, C26, C28, C29      |
| H29      | C27, C30, C31, C33         | C31, C33                |                         |
| H32      | C28, C30                   | C28, C30, C31           | C28                     |
| H33      |                            | C29, C31                | C29, C31                |
| H35      | C34                        | C34                     | C34                     |
| H36      | C37, C38                   |                         | C40                     |
| H38      | C39, C40, C44              | C37, C39, C44           | C39, C40, C41           |
| H40      | C42                        | C11, C42, C44           | C43, C44                |
| H42      | C44                        | C40, C44                | C41                     |
| H43      | C39, C41                   | C39, C41                | C40                     |
| H46      |                            | C45, C47                | C45, C47                |
| H47      | C45, C46                   | C45, C46                | C45, C46                |

<sup>33</sup> It should be noted for data in this table, and the following ROESY spectral data table, that the natural material's NMR was acquired at Harvard, while NMR of synthetic material was acquired at Scripps. Slight differences in the respective experimental pulse sequences may explain slight differences in observed correlations.

**Table S7, Comparison of ROESY of natural isolate, synthetic tryptorubin A (1a), and *atrop*-tryptorubin A (1b)**

| Position | Natural product<br>nOe to | Synthetic 1a<br>nOe to | Synthetic 1b<br>nOe to  |
|----------|---------------------------|------------------------|-------------------------|
| H1       |                           |                        |                         |
| H2       | H3                        | H3                     | H3, H5                  |
| H3       | H2, H3, H5                | H2, H3, H5             | H2, H3, H5              |
| H4       |                           |                        |                         |
| H5       | H3, H6, H9                | H2, H3, H6, H10        | H2, H3, H10, H15        |
| H6       | H5                        | H5                     | H5, H10, H15            |
| H7       |                           |                        |                         |
| H8       |                           |                        |                         |
| H9       | H3, H10, 2NH              | H10, H42               | H10, H40                |
| H10      | H10, H42                  | H9, H10, H42           | H5, H9, H10, H40        |
| H11      |                           |                        |                         |
| H12      | H20, H40                  | H20, H40               | H20, H42                |
| H13      |                           |                        |                         |
| H14      | H15, H40                  | H6, H15                | H10                     |
| H15      |                           | H10, H14, H40          |                         |
| H16      |                           | H17                    | H15                     |
| H17      |                           | H20                    | H10, H15, H16           |
| H18      |                           |                        |                         |
| H19      |                           |                        |                         |
| H20      | H12, H21, H24             | H12, H21, H22, H24     | H12, H21, H22, H24      |
| H21      | H24                       | H20, H22, H23          | H20, H22, H23, H24      |
| H22      | H21                       | H20, H21, H23          | H20, H21, H22, H23, H24 |
| H23      | H21                       | H21, H22               | H21, H22, H24           |
| H24      | H21, H22                  | H20, H21               | H20, H21                |
| H25      |                           |                        |                         |
| H26      | H27, 20NH                 | H27                    | H27                     |
| H27      | H26                       | H26, H27               | H26, H27, H29, H33      |
| H28      |                           |                        |                         |
| H29      | 26NH                      | H36, H38, H43          | H27, H43                |
| H30      |                           |                        |                         |
| H31      |                           |                        |                         |
| H32      |                           | H27                    | H27                     |
| H33      | H27                       | H27                    | H27                     |
| H34      |                           |                        |                         |
| H35      | H38                       | H38                    | H36                     |
| H36      | H40                       | H38, H40               | H35, H36, H38, H40      |
| H37      |                           |                        |                         |
| H38      | H35                       | H29, H35, H36          | H29, H36, H47           |
| H39      |                           |                        |                         |

|     |          |                   |                   |
|-----|----------|-------------------|-------------------|
| H40 | H12, H36 | H12, H36, H42     | H9, H10, H12, H36 |
| H41 |          |                   |                   |
| H42 | H9, H10  | H9, H10           | H12, H43          |
| H43 | H42      | H9, H10, H29, H42 | H29, H42          |
| H44 |          |                   |                   |
| H45 |          |                   |                   |
| H46 |          | H47               | H47               |
| H47 | H46      | H46               | H46               |

NOTE: An astute observer will note that in the graphical  $^{13}\text{C}$  NMR data (p. 79), there are several unassigned peaks that are present in synthetic but not natural tryptorubin A, and also several unassigned peaks that are present in natural but not synthetic tryptorubin A. While the origin of these peaks is unclear, it is note worthy that all ASSIGNED  $^{13}\text{C}$  resonances correlate well between the natural and synthetic material. Additionally, the  $^1\text{H}$  NMR coinjection experiment (p. 78) verifies that these compounds are indeed the same species.



## 2D NMR spectra for compound 1a (synthetic and natural)

$^1\text{H}$ - $^1\text{H}$  ROESY spectrum for **1a** (Note: explicitly annotated correlations are those discussed in following section, "Explanation of NMR analysis of two atropisomers")

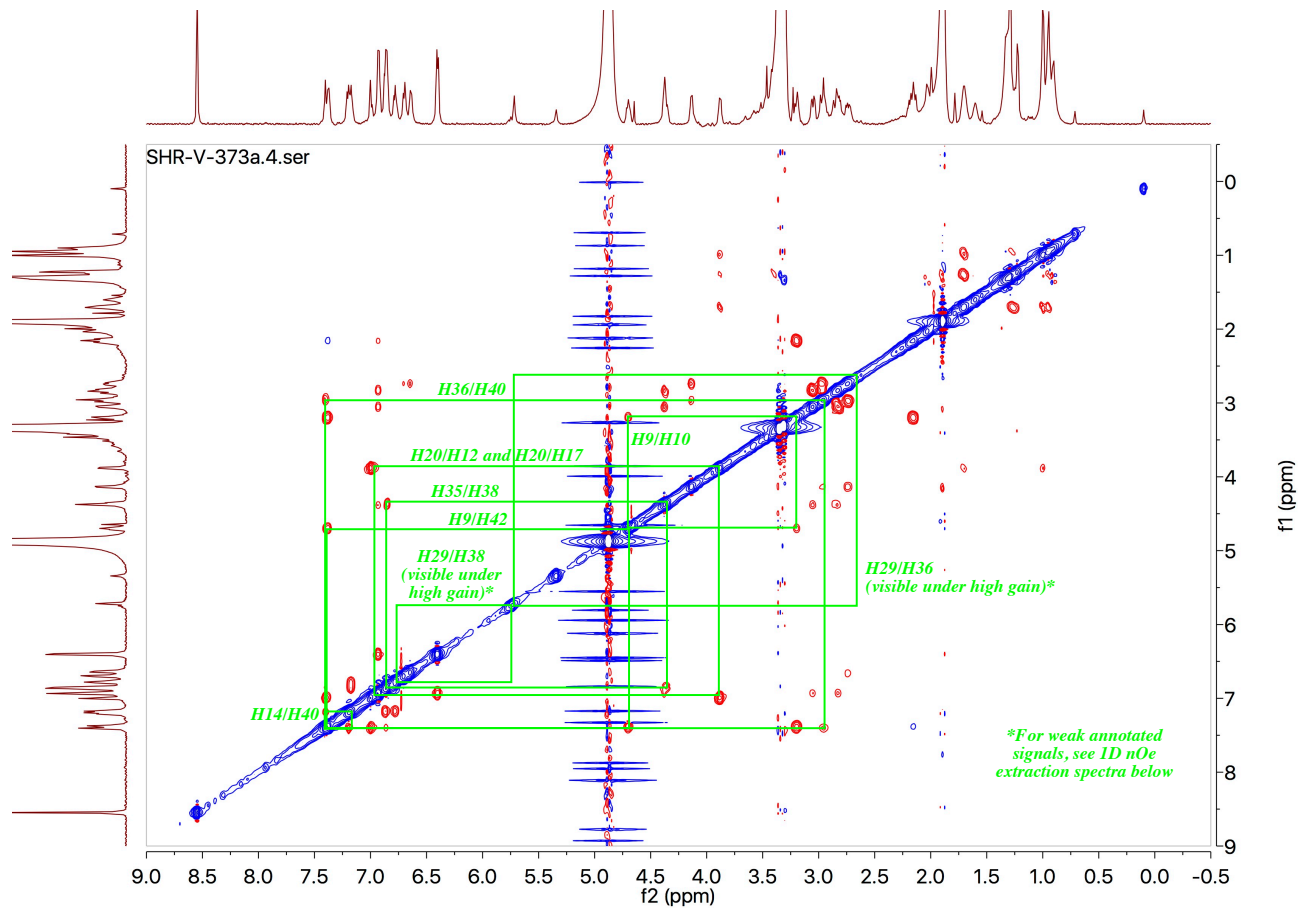

$^1\text{H}$ - $^1\text{H}$  1D nOe extractions for **1a**, F1 = 5.72 ppm (H29)

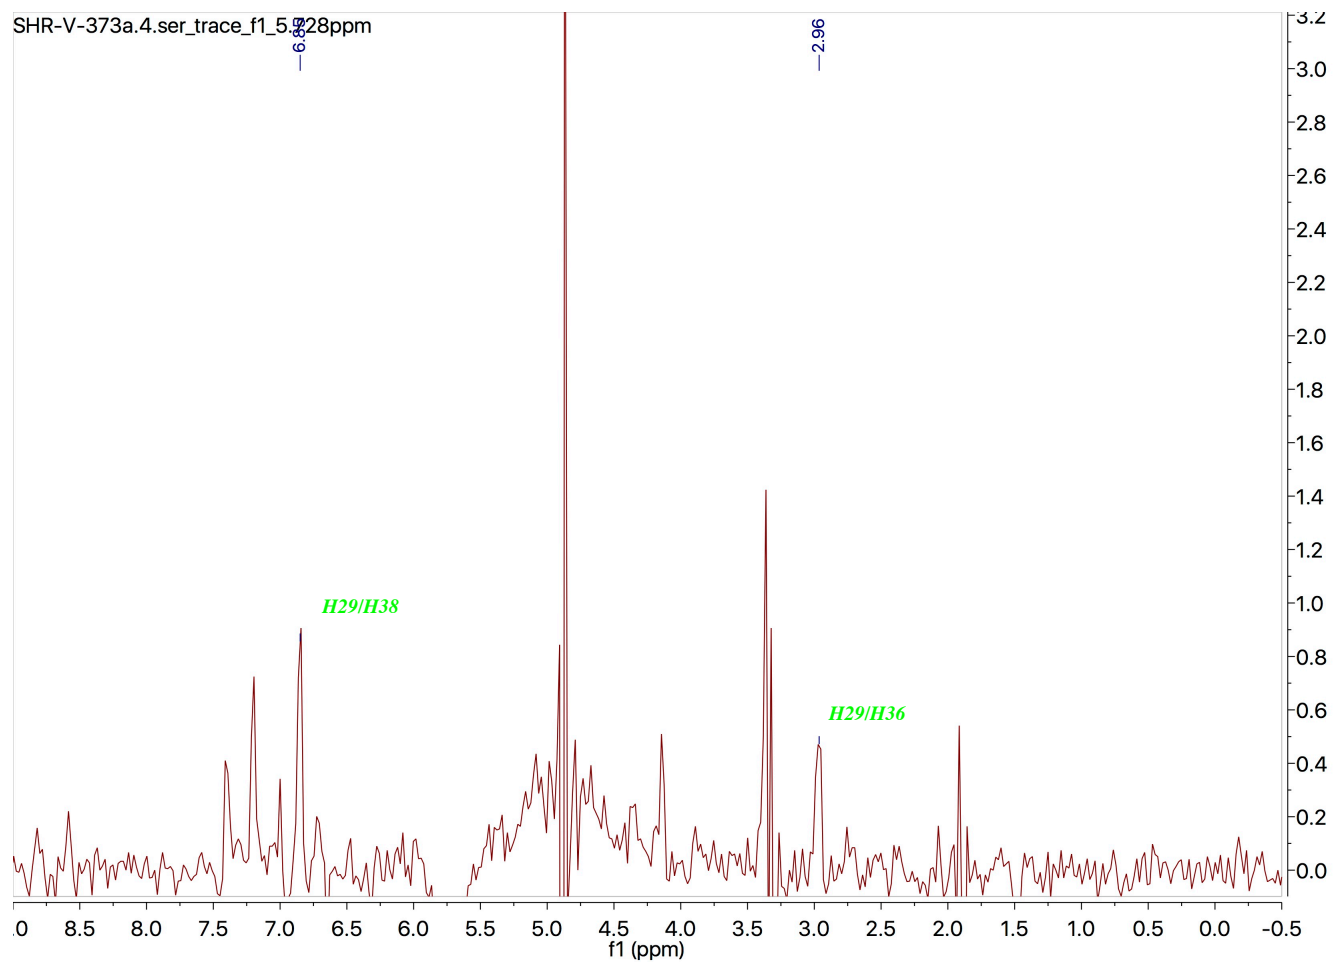

$^1\text{H}$ - $^1\text{H}$  ROESY spectrum for **1a**, unannotated comparison: synthetic material (above) and natural isolate (below)

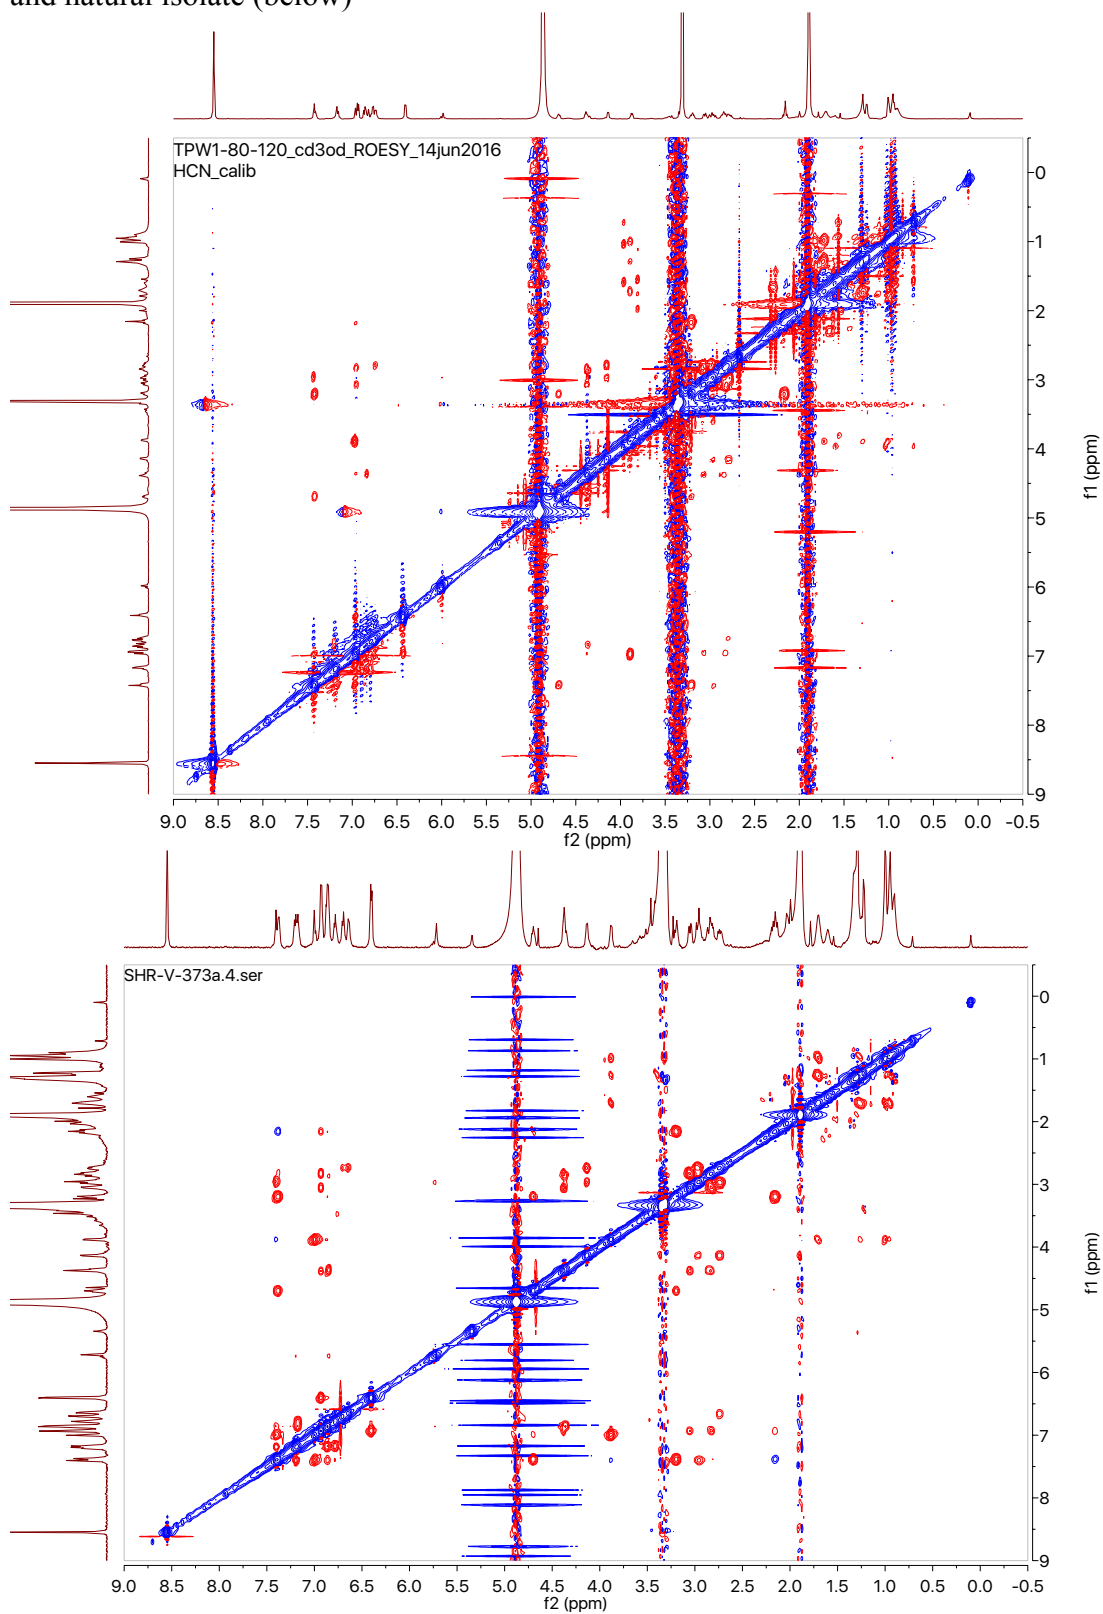

$^1\text{H}$ - $^{13}\text{C}$  HSQC spectrum for **1a**: synthetic material (above) and natural isolate (below)

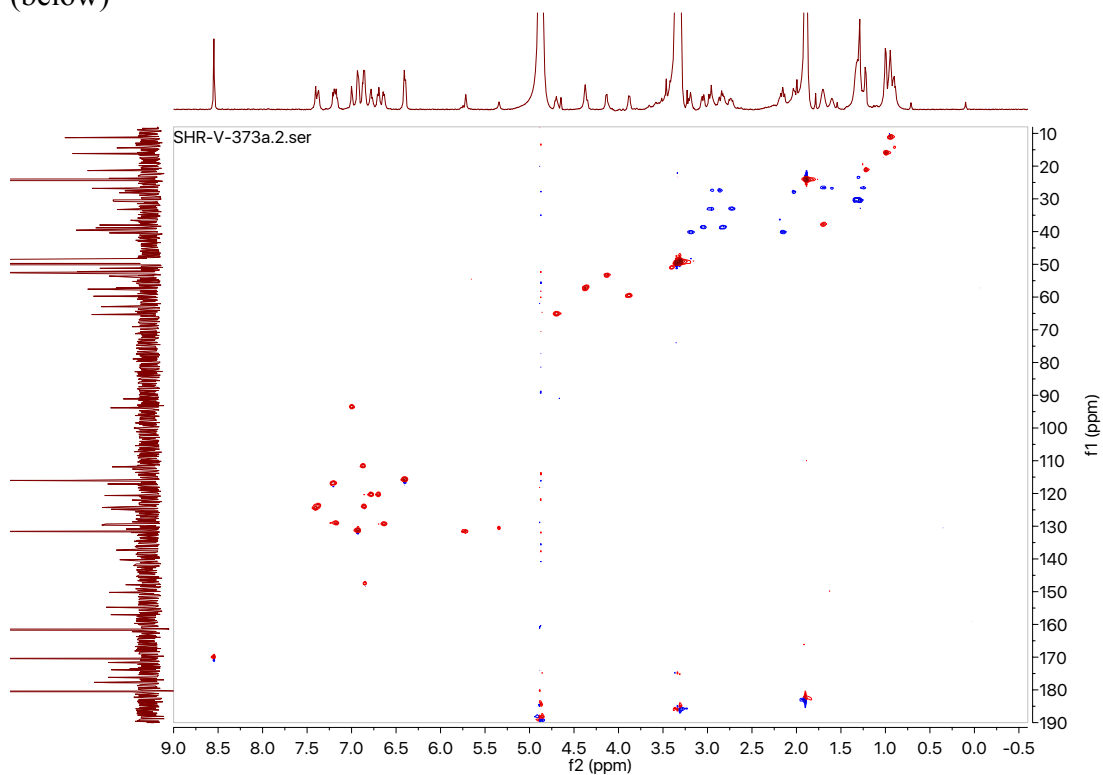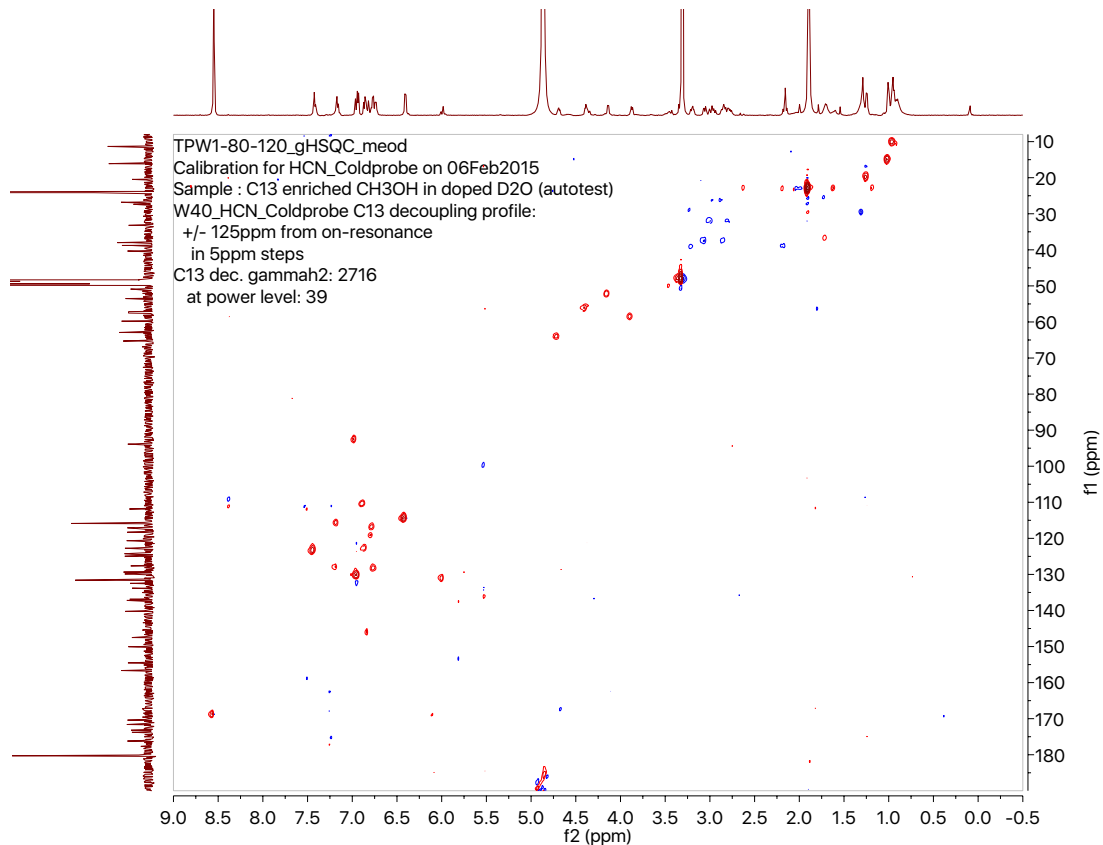

$^1\text{H}$ - $^{13}\text{C}$  HSQC superimposed spectra for **1a**, synthetic material (green-blue) and natural isolate (blue-red). Above left, 8 to 5 ppm f2 region; above right, 5 to 3.5 ppm f2 region; below left, 3.5 to 2 ppm f2 region; below right, 2 to 0 ppm f2 region.

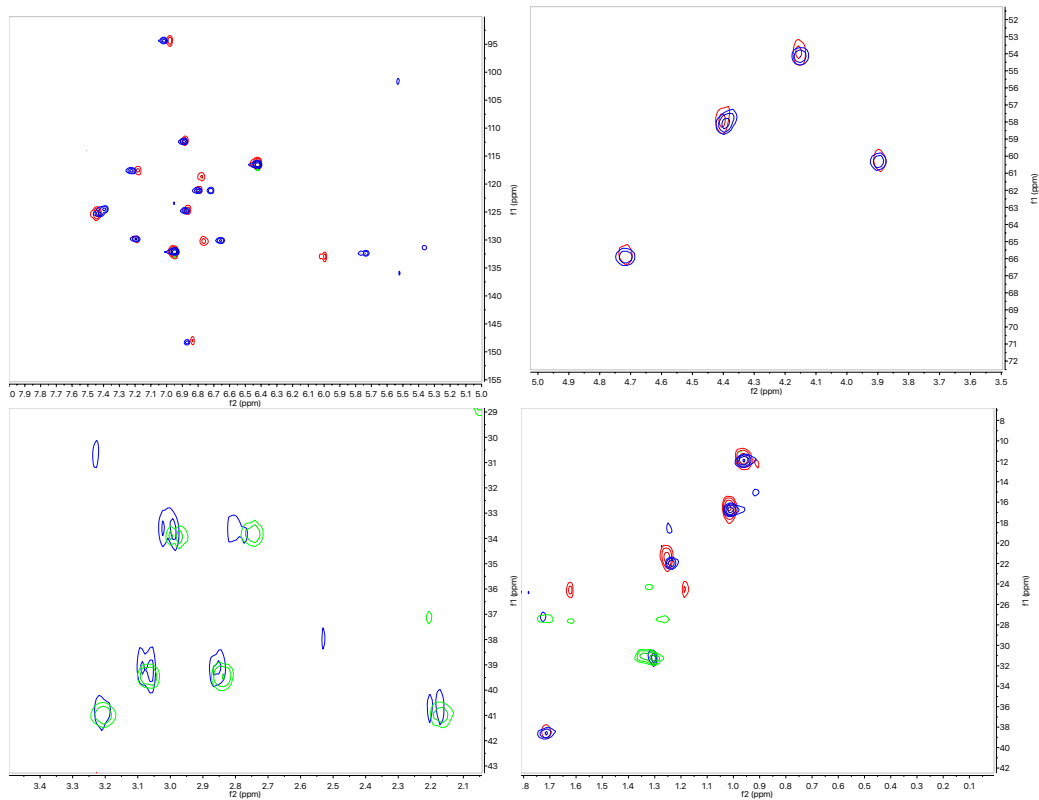

$^1\text{H}$ - $^{13}\text{C}$  HMBC spectrum for **1a**: synthetic material (above) and natural isolate (below)

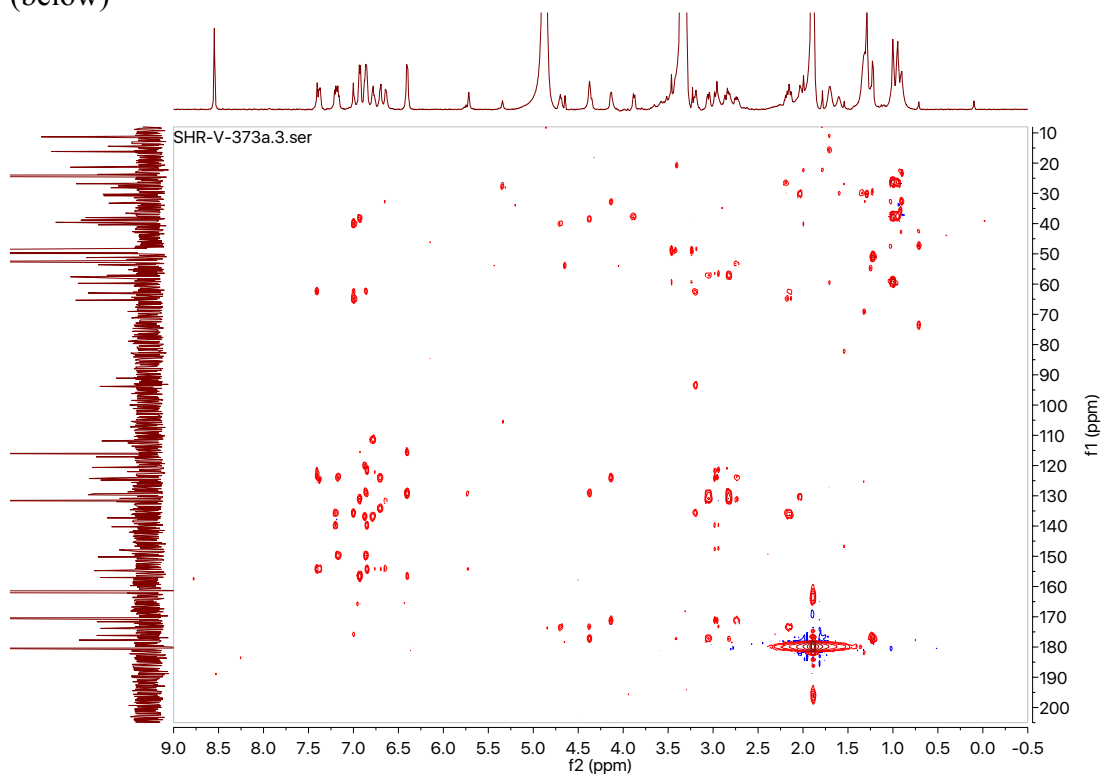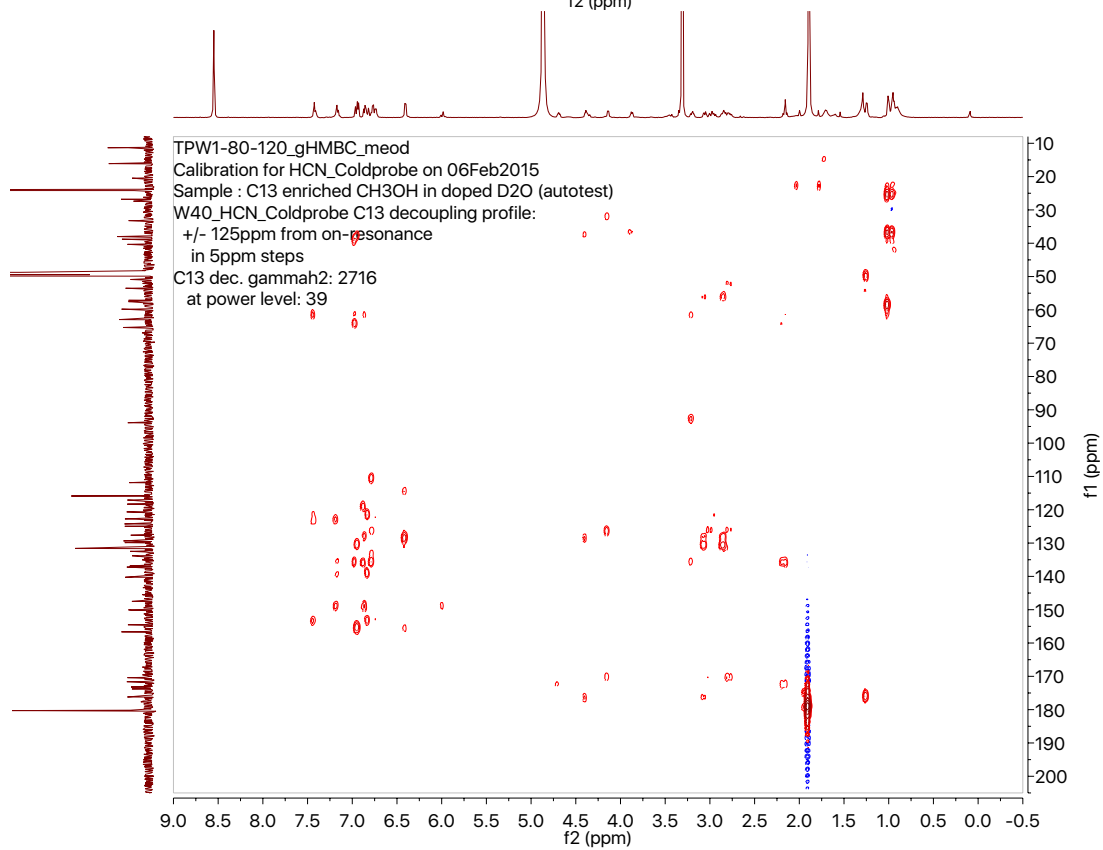

## 2D NMR spectra for compound 1b

$^1\text{H}$ - $^1\text{H}$  ROESY spectrum for **1a** (Note: explicitly annotated correlations are those discussed in following section, "Explanation of NMR analysis of two atropisomers")

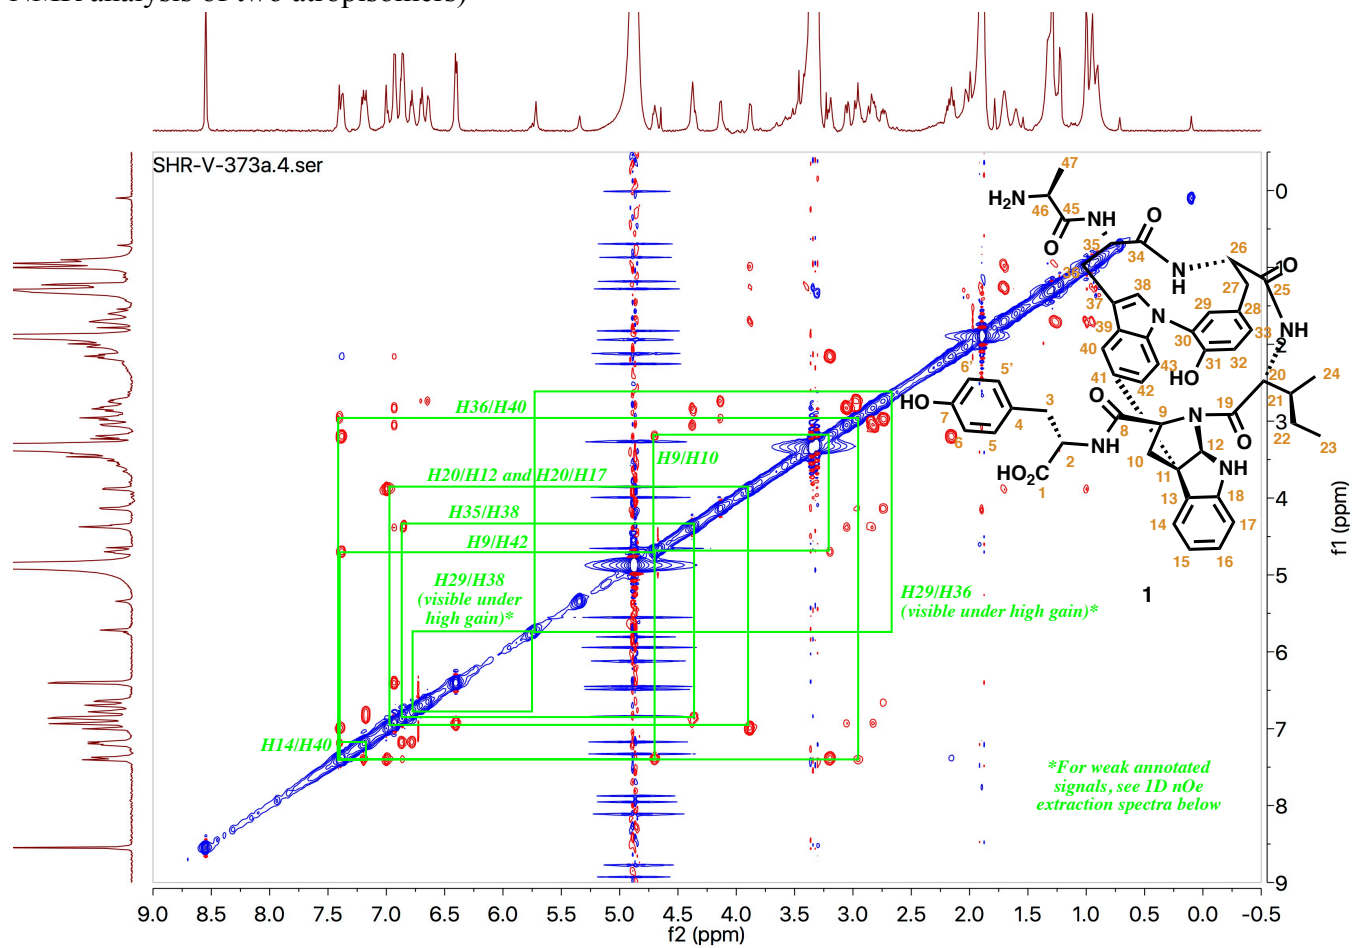

$^1\text{H}$ - $^1\text{H}$  COSY spectrum for **1b**

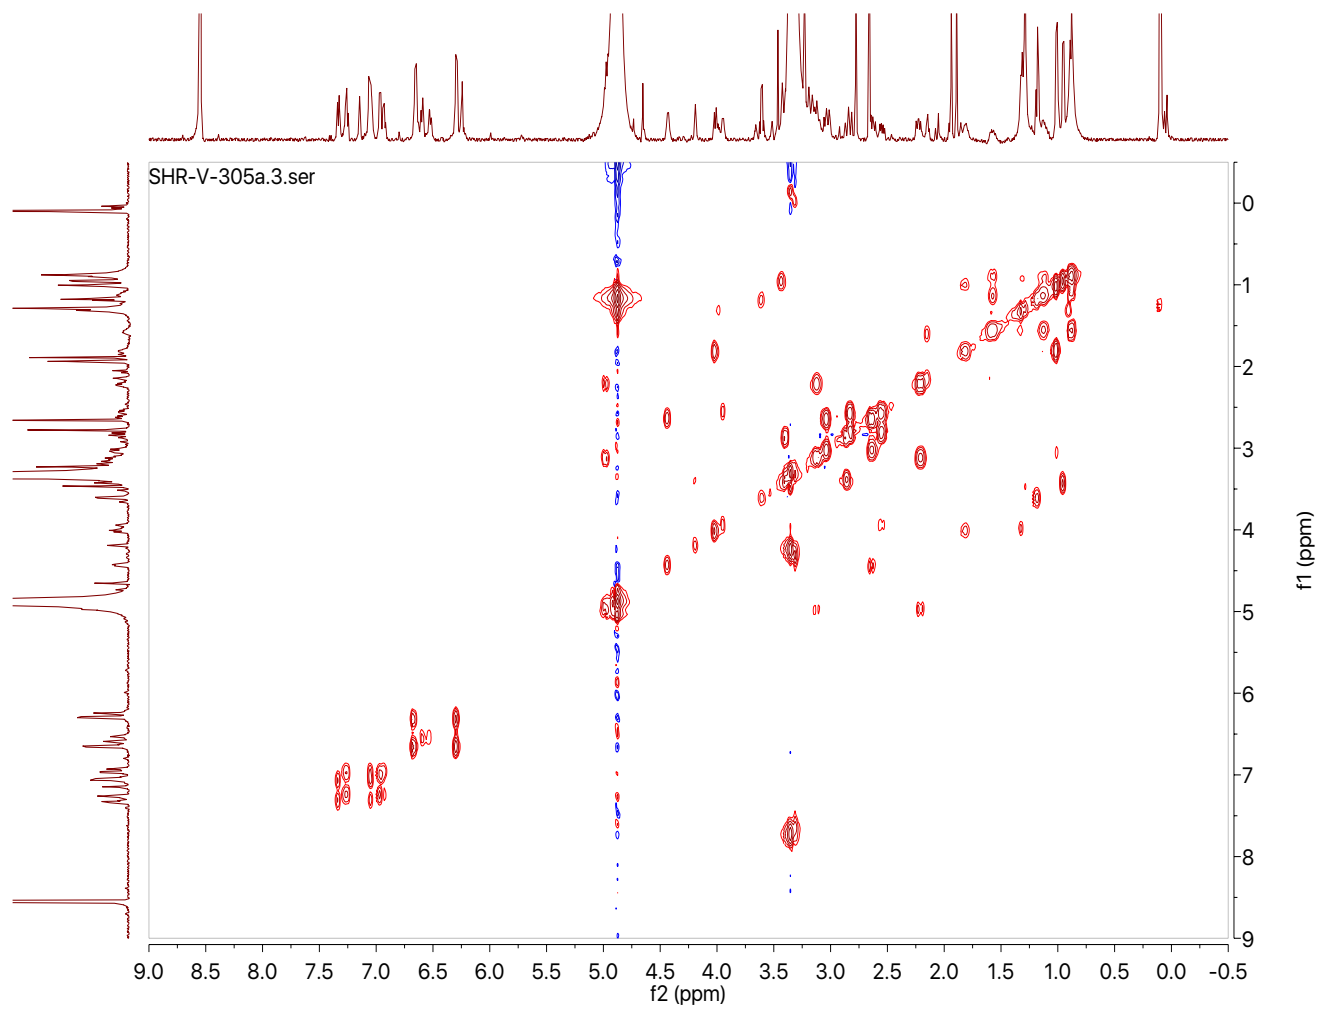



$^1\text{H}$ - $^{13}\text{C}$  HSQC spectrum for **1b**

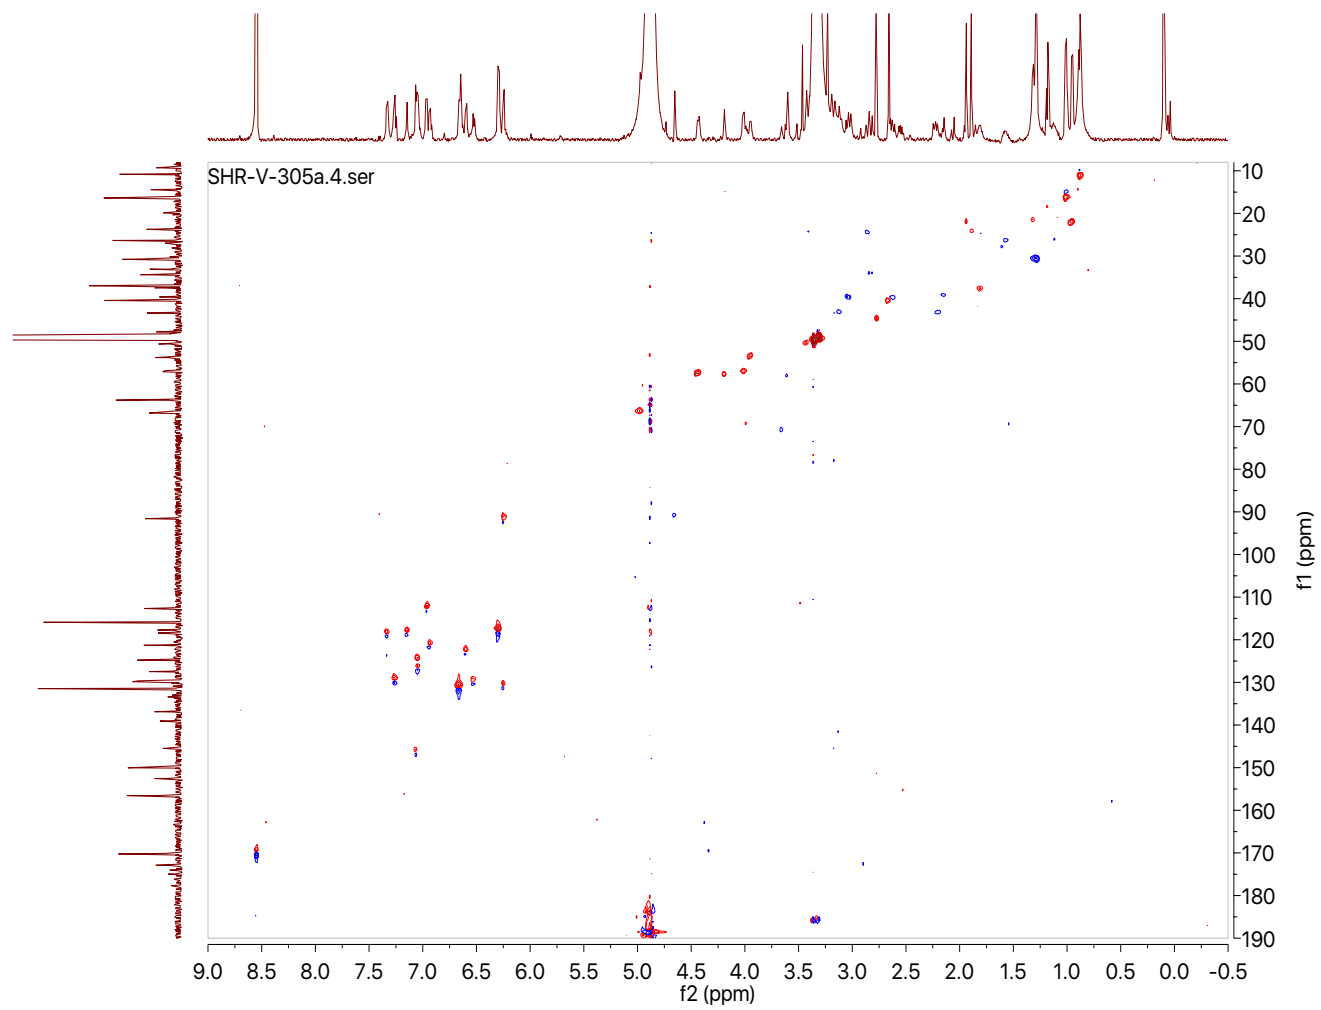

$^1\text{H}$ - $^{13}\text{C}$  HMBC spectrum for **1b**

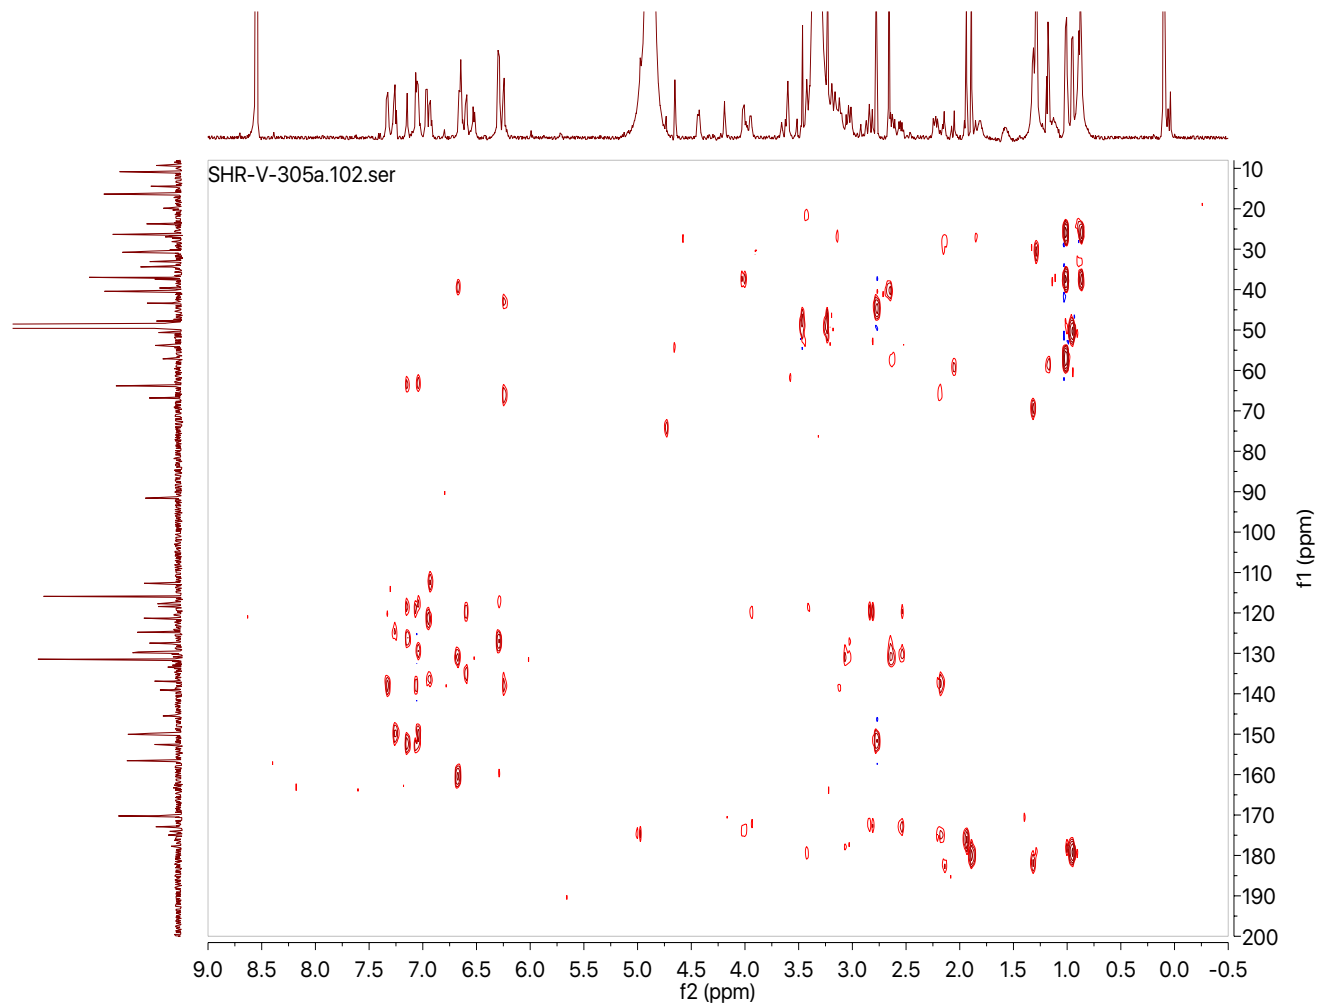

## Explanation of NMR analysis of the two atropisomers

Prior to our hypothesis that **1a** and **1b** are atropisomers of one another, we considered a variety of other possibilities that could explain the differences in NMR resonances between these two compounds. We first collated the structural features we were confident in:

1. Given the HRMS data, the peptidic nature of the natural product, and the extensive labeling studies reported in the initial isolation disclosure, we felt safe in the assumption that the compound was constructed from six canonical amino acids-- Two tryptophans, two tyrosines, and one each of alanine, and isoleucine.
2. In the initial isolation disclosure, <sup>13</sup>C-labeled material allowed for a C-C COSY. This COSY allowed unambiguous correlations across the peptide chain, making us feel secure in the determination that the peptidic backbone sequence was Ala-Trp-Tyr-Ile-Trp-Tyr. A strong HRMS daughter peak at  $m/z = 825.3$ , corresponding to  $[M - \text{Ala}]^+$ , also further supported this hypothesis. HMBCs across at least one peptide bond (H2 to C8) also confirmed the backbone assignment.
3. Finally, the presence of a pyrroloindoline was confidently postulated; based on the monomeric building blocks at hand, we viewed a pyrroloindoline as the only possible motif corresponding to the <sup>13</sup>C NMR shift of C12 (*ca.* 94 ppm).
4. Based on the H-N HMBC studies disclosed in the isolation report (specifically, an H29 to N38 correlation), we felt assured in the assignment of the indole nitrogen-to-phenol (N38 to C30) bond.

Taking these facts together, we reasoned—before considering atropisomerism—that possibilities for a structural difference between **1a** and **1b** were as follows:

1. Either **1a** or **1b** could contain one or more *D*-amino acid  $\alpha$ -centers. That is, either the natural product was constructed from one or more *D*-amino acids, or in the synthetic pursuit of **1b**, synthetic manipulations had epimerized one or more  $\alpha$ -centers.
2. It was possible that the non-proteogenic pyrroloindoline stereocenters (i.e., C11 and C12) had been incorrectly assigned in either **1b** or **1a**; that is, in either **1a** or **1b**, the pyrroloindoline consisted of *exo* relative stereochemistry.
3. It was possible that the regiochemistry of the C11-to-C41 bond had been misassigned; that is, in either **1a** or in **1b**, the bond actually extended from C11 to C42 (indole C6 alkylation), rather than C41.

Next, we describe how, for both **1a** and **1b**, we ruled out each of the above possibilities regarding a theoretical misassignment:

1. **Ruling out a *D*-amino acid. (See Fig. S6 and S7)**
  - a. For **1a**: Marfey's analysis, as reported in the initial isolation disclosure, yielded free *L*-alanine and *L*-tyrosine from hydrolysis of the N- and C-

terminal residues, respectively, confirming the configuration of C46 and C2, respectively. An nOe correlation from H9 to H42, and also from H9 to only the convex H10 of diastereomeric methylene C10, unambiguously assigned the configuration of C9 as *L*. An nOe correlation from H20 to H12 unambiguously assigned C20 as *L*. For the molecule to be geometrically feasible, C26 was required to be *L*; the bridged macrocycle could not geometrically form if that stereocenter were *D*. An nOe correlation from H35 to H38 allowed us to unambiguously assign C35 as *L*. We concluded all  $\alpha$ -centers were *L* in configuration.

- b. For **1b**: In the synthesized material, the fact that we started from *L*-amino acid building blocks and didn't observe diastereomeric erosion was, in itself, support that all amino acids had *L* configuration. Additionally, we had the following evidence via NMR analysis: An nOe correlation from H9 to H40 unambiguously confirmed C9's configuration as *L*. An nOe correlation from H20 to H12 unambiguously confirmed C20's configuration as *L*. An nOe correlation from H35 went to only one hydrogen of the diastereopic methylene H36, and this same hydrogen correlated by nOe to H40. Taken together, these correlations unambiguously confirm the configuration of C35 as *L*. No direct evidence for the configuration of C2 and C46 was observed, but as stated above, it is unlikely that these centers epimerized exclusively to the undesired stereochemistry.

**Figure S6, nOe data that supports stereochemical assignment**

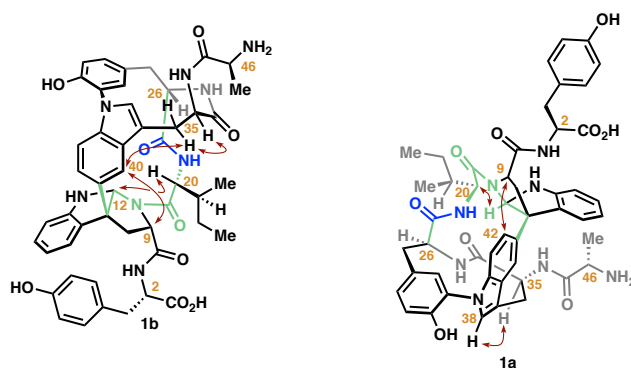

No 2D NMR correlations could unambiguously confirm the configuration of C26 in **1b**. However, a 1D ROE extraction showed a very weak – but distinct – correlation from H26 to H12, confirming H26's *L* configuration (see Fig. S7).

**Figure S7, Weak ROE from H26 to H12**

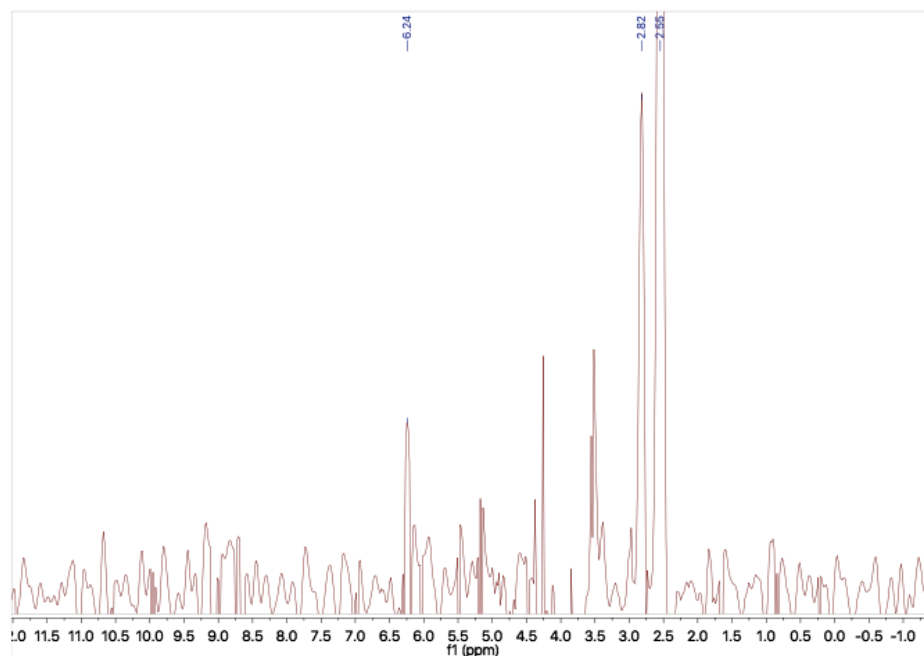

Additionally, X-ray crystallography of a reasonably late-stage intermediate (**7**) showed the correct *L* configuration. However, we viewed these evidences of C26's configuration as insufficient, and thus embarked on a total synthesis campaign to prepare the C26 epimer of **1b** (*vide supra* for synthesis of *epi-8*). Having prepared *epi-8*, we attempted to close the final macrolactam, and were surprised to observe that this epimer failed to condense to the desired bicycle, despite screening a variety of conditions (Table S8) that were known to cyclize the epimeric congener (i.e., **8** --> **SI-17**). Given these data, we feel that cyclization of *epi-8* to the hypothetical *epi-SI-17* (Fig. S8) is unfeasible.<sup>34</sup> Similarly, we view it as tremendously unlikely that bicycle **SI-17** could epimerize post-cyclization to *epi-SI-17*, given that such an epimerization would require abstraction of an endocyclic proton (Fig. S8). In addition to these data, it is worth noting that intermediates on the route towards *epi-SI-17* all had a characteristic rotamerism in their NMR spectra that was absent from the *S*-configured congeners (compare, for example, the <sup>1</sup>H NMR spectra of **SI-16** vs. *epi-SI-16*). Final atropisomer **1b** did not show this rotamerism,

<sup>34</sup> Comparison of crystal structures of intermediates with the C26-*epi* configuration, vs. the natural C26 configuration (i.e., **7** vs. *epi-SI-21*; Fig. S9), helped us form a mechanistic hypothesis for the *epi* scaffold's reticence to cyclization. Specifically, for the *epi* scaffold to lactamize, the newly-formed ring would have to be supra-facial to the pendant alanine (represented by in *epi-SI-21* as a benzamide by analogy), and this steric clash strongly disfavors cyclization. In contrast, the natural stereochemistry allows the macrolactam to be antara-facial to the alanine, which is more sterically feasible.

further supporting its assignment as (*S*). Taken together, we conclude that **SI-17** indeed has the desired C26 (*S*) stereochemistry, and in turn, that **1b** consists of only *L* amino acid residues.

**Figure S8, Epimer cyclization experiments to confirm SI-17 stereochemical assignment**

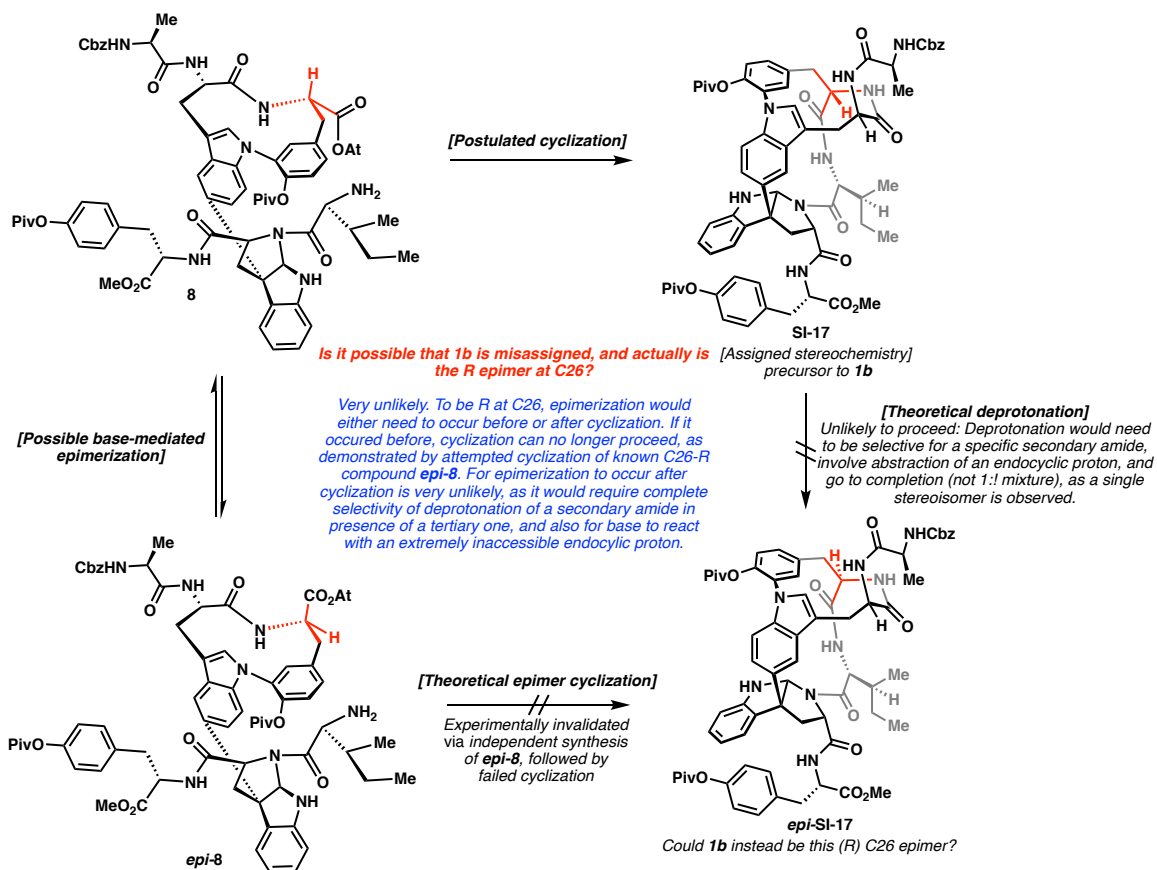

**Figure S9, crystallographic analysis that rationalizes the reticence of the *epi* scaffold to cyclize**

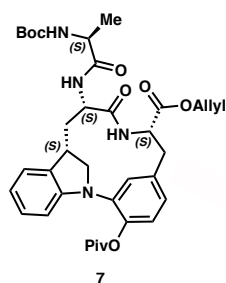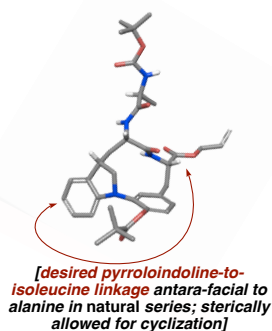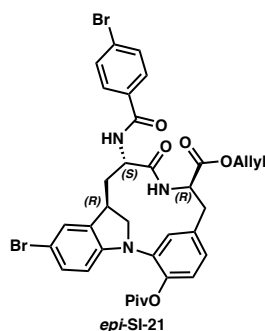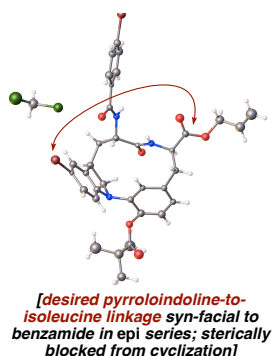

**Table S8, Conditions that cyclize 8 but not *epi*-8**

**Standard conditions:** base = DIPEA; solvent = MeCN; coupling reagent = PyAOP; final concentration = 0.5 mM; addition method = dual slow addition of PyAOP and substrate. “Non-zero” product was determined to be present *via* any mass hit of desired product upon LCMS analysis.

| Entry | Difference from standard conditions | Non-zero SI-17 observed from 8 | Non-zero <i>epi</i> -SI-17 observed from <i>epi</i> -8 |
|-------|-------------------------------------|--------------------------------|--------------------------------------------------------|
| 0     | none                                | ✓                              | ✗                                                      |
| 1     | base = collidine                    | ✓                              | ✗                                                      |
| 2     | base = NMM                          | ✓                              | ✗                                                      |
| 3     | solvent = DMF                       | ✓                              | ✗                                                      |
| 4     | solvent = DMA                       | ✓                              | ✗                                                      |
| 5     | solvent = DMSO                      | ✗                              | ✗                                                      |
| 6     | coupling reagent = HATU             | ✓                              | ✗                                                      |
| 7     | coupling reagent = PyOxim           | ✓                              | ✗                                                      |
| 8     | coupling reagent = EDCI/DMAP        | ✓                              | ✗                                                      |
| 9     | coupling reagent = T3P              | ✗                              | ✗                                                      |
| 10    | final concentration = 0.05 mM       | ✓                              | ✗                                                      |
| 11    | final concentration = 5 mM          | ✗                              | ✗                                                      |
| 12    | mix reagents all at start           | ✗                              | ✗                                                      |
| 13    | Slow add'n of substrate to PyAOP    | ✗                              | ✗                                                      |

2. **Ruling out misassigned stereochemistry at pyrroloindoline (C11/C12)** (See Fig. S6): For both **1a** and **1b**, nOe correlations from H9 to Trp2 aryl protons (H42 and H40 for **1a** and **1b**, respectively) unambiguously assign the pyrroloindoline relative stereochemistry as *endo*. A misassignment in this relative stereochemistry was thus ruled out.
3. **Ruling out a regioisomeric bond at C11** (See Fig. S10): Consider, as a thought experiment, if the C11 to C41 bond were regiochemically misassigned; that is, that either **1b** or **1a** contained a bond from C11 to C42 (Note that C42 is “C6” of the indole, a much more common site of alkylation in indole alkaloids). If this had been the case, the sole singlet on Trp2 would have belonged to H43 rather than H40. However, the aryl singlet in both **1a** and **1b** showed an nOe correlation with H36, unambiguously assigning the singlet as H40, and thus the regio-site of alkylation as C41. The key nOe correlation is shown in Fig. S10 for **1a**, and the argument is directly analogous for **1b**.

**Figure S10, nOe data that supports regiochemical assignment**

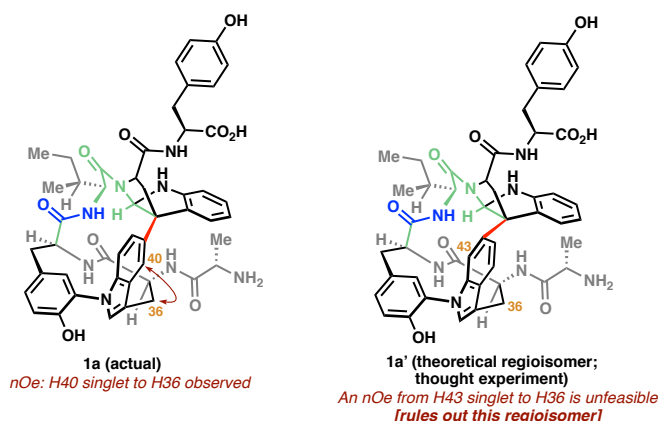

With these other possibilities for structural isomerism ruled out, we felt confident that both the atomic connectivity and stereochemistry of **1a** and **1b** were identical. The striking similarity in the HMBC, and most of the ROESY, for **1a** and **1b** is notable, and supports this assignment.

This left us, by systematic process of elimination, with the hypothesis that **1a** and **1b** were atropisomers. As discussed in the main manuscript, the single geometric constraint of an nOe correlation from H9 to H40 in **1b**, and from H9 to H42 in **1a**, was enough to unambiguously assign the two compounds' respective atropochemistry. The following nOe correlations additionally strengthened this hypothesis (Fig. S11 shows these correlations graphically):

1. H9 to H42 in **1a**; vs. H9 to H40 in **1b**



2. H12 to H42 in **1b**; conspicuously absent in **1a**.
3. H14 to H40 in **1a**; conspicuously absent in **1b**.
4. H17 to H20 in **1a**; conspicuously absent in **1b**.
5. H29 to both H38 and H36 in **1a**; conspicuously absent in **1b**.
6. H29 to H27 in **1b**; conspicuously absent in **1a**.

**Figure S11, nOe data that supports topisomerism.**

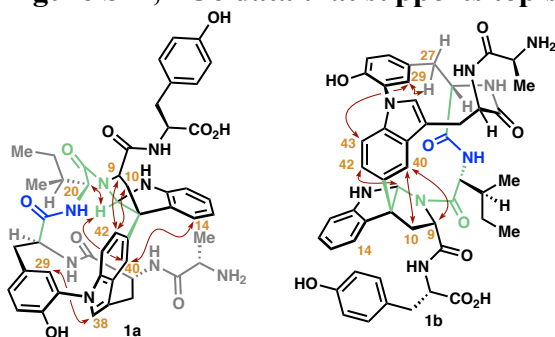

### Stacked NMR spectra of natural and synthetic tryptorubin A

$^1\text{H}$  NMR spectra. Top lane, natural tryptorubin A; second lane, synthetic **1b**; third lane, *ca.* 1:1 mixture of synthetic **1a** and natural tryptorubin A; fourth lane, synthetic **1a**.

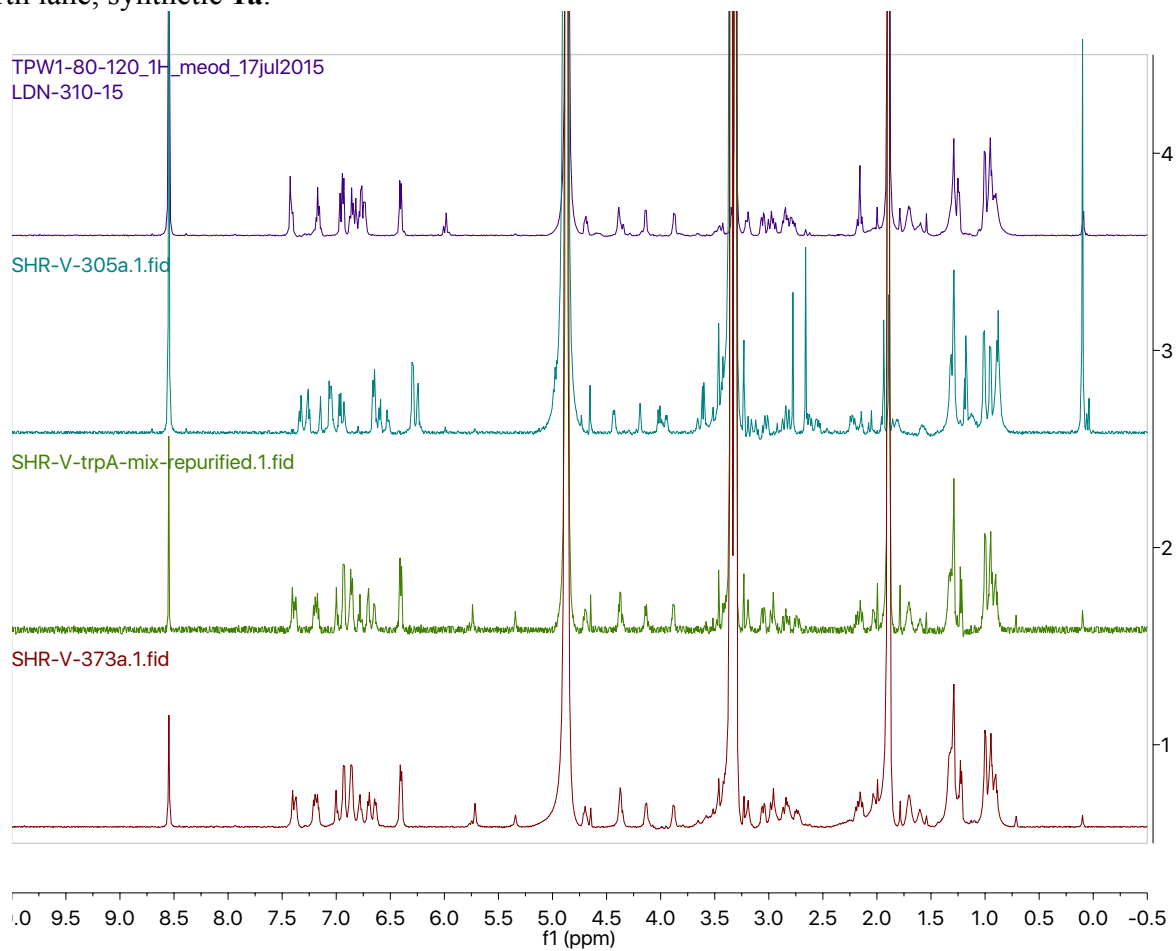

$^{13}\text{C}$  NMR spectra. Top lane, synthetic **1a**; middle lane, natural tryptorubin A; bottom lane, synthetic **1b**.

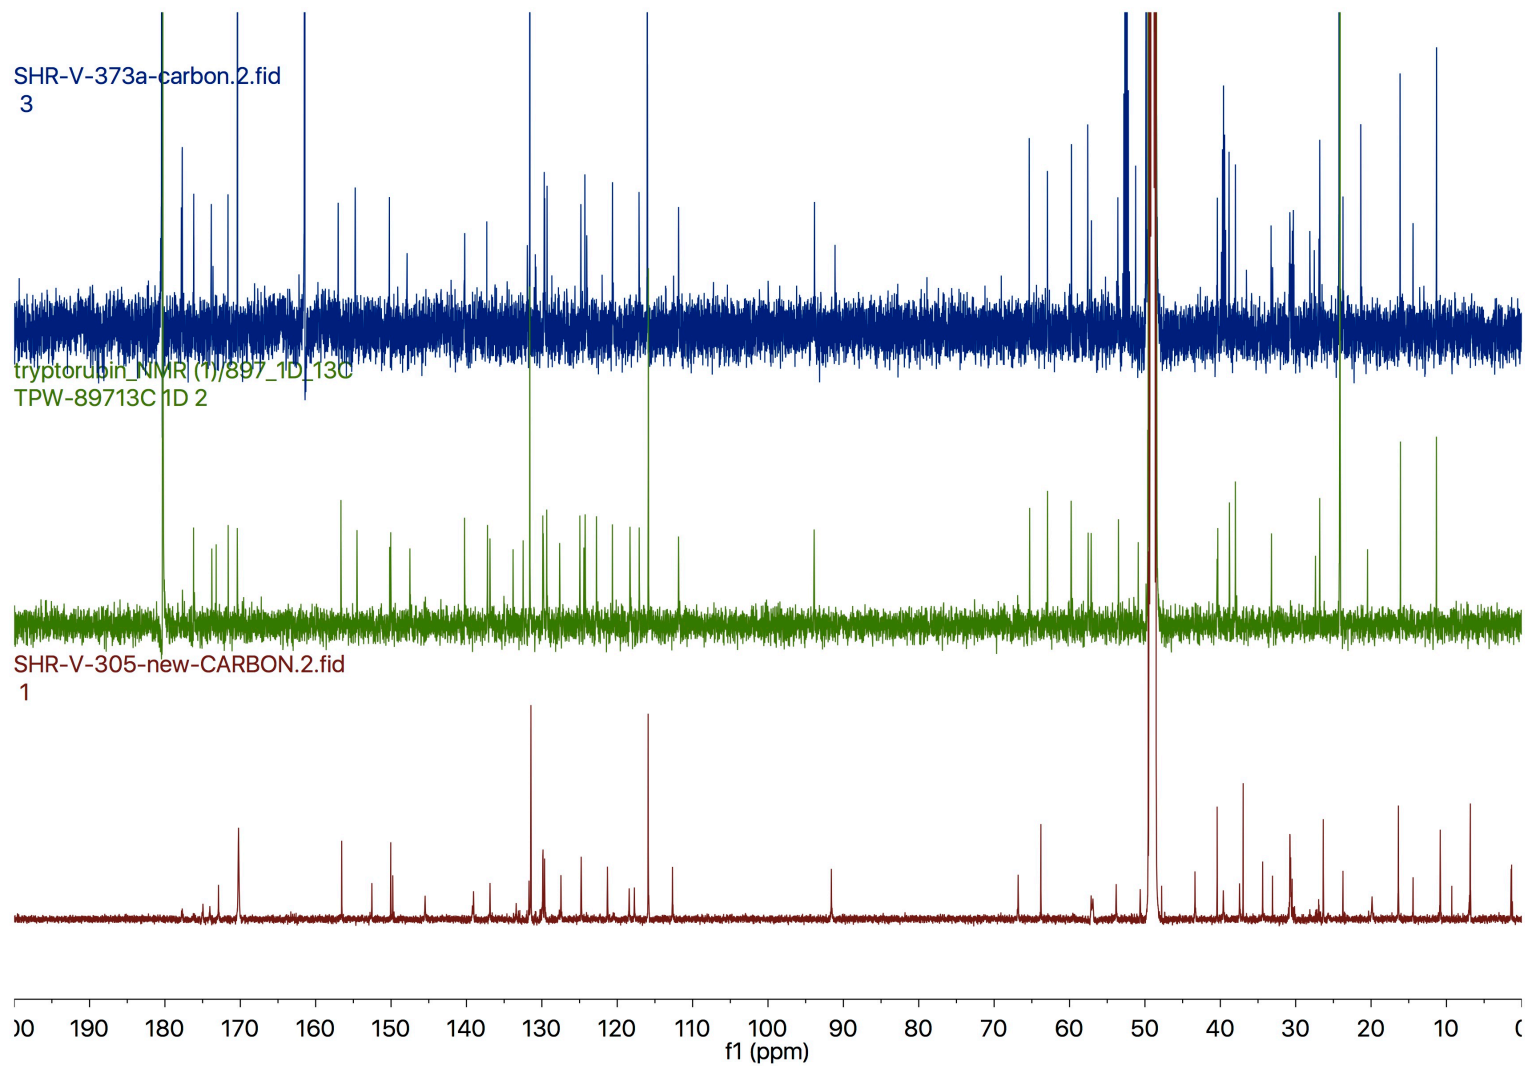

## LCMS co-injection of natural tryptorubin A, synthetic 1a, and synthetic 1b

Solutions of 0.05 mg/mL of natural isolate, synthetic **1a**, and a 1:1 mixture of the two were analyzed on a Waters I-Class LC connected to a Waters QDa single quadrupole mass spec. The samples were eluted off of a Waters Cortecs C18 column (1.6 mm, 2.1x55 mm, 90 Å) under isocratic conditions [0.6 mL/min, 84:16 (0.1% formic acid / H<sub>2</sub>O) : acetonitrile] at 35 °C. The compound of interest and any potential constitutional isomers were detected by Single Ion Recording in ESI+ ( $m/z = 897.4$ ). The chromatogram below shows identical retention times for natural (green) and synthetic (red) material, and a single peak (blue) with no shouldering when the two compounds are co-injected:

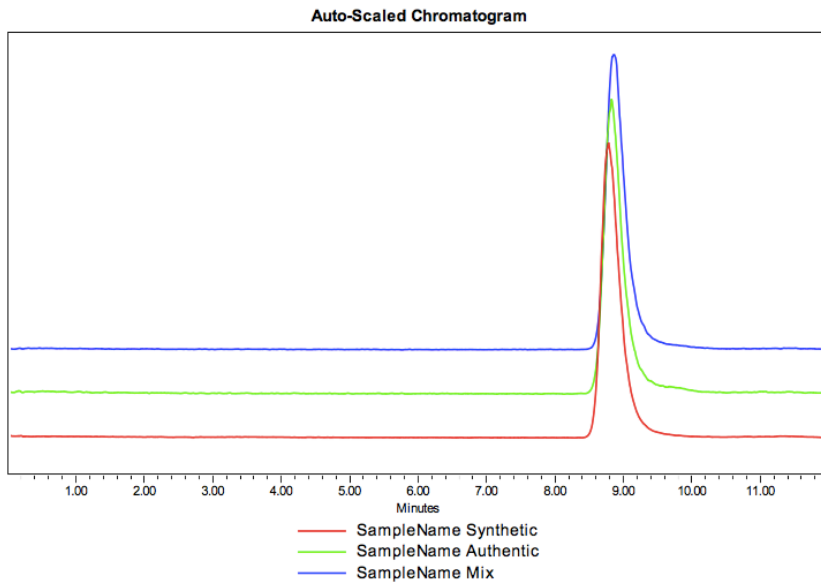

Solutions of 0.05 mg/mL of natural isolate, and synthetic **1b** were analyzed on an Agilent 1260 Infinity LC connected to an Agilent 6230 TOF mass spec. The samples were eluted off of an Agilent Poroshell 120 C18 column (1.6 mm, 2.1x55 mm, 90 Å), eluting with gradient conditions [0.7 mL/min, 10 to 99% MeCN/H<sub>2</sub>O with 0.1% formic acid, over 8.8 min, followed by an isocratic hold at 99% MeCN/H<sub>2</sub>O with 0.1% formic acid for an additional 3 min] at 35 °C. For the natural compound, the compound of interest and any potential constitutional isomers were detected by Single Ion Recording in ESI+ ( $m/z = 897.4$ ) (bottom lane). For synthetic **1b**, detection was effected both *via* Single Ion Recording (middle lane) and also *via* monitoring absorbance at 254 nm (top lane). The chromatogram shows that the two compounds are clearly distinct, with **1b** being significantly more retentive under these elution conditions:

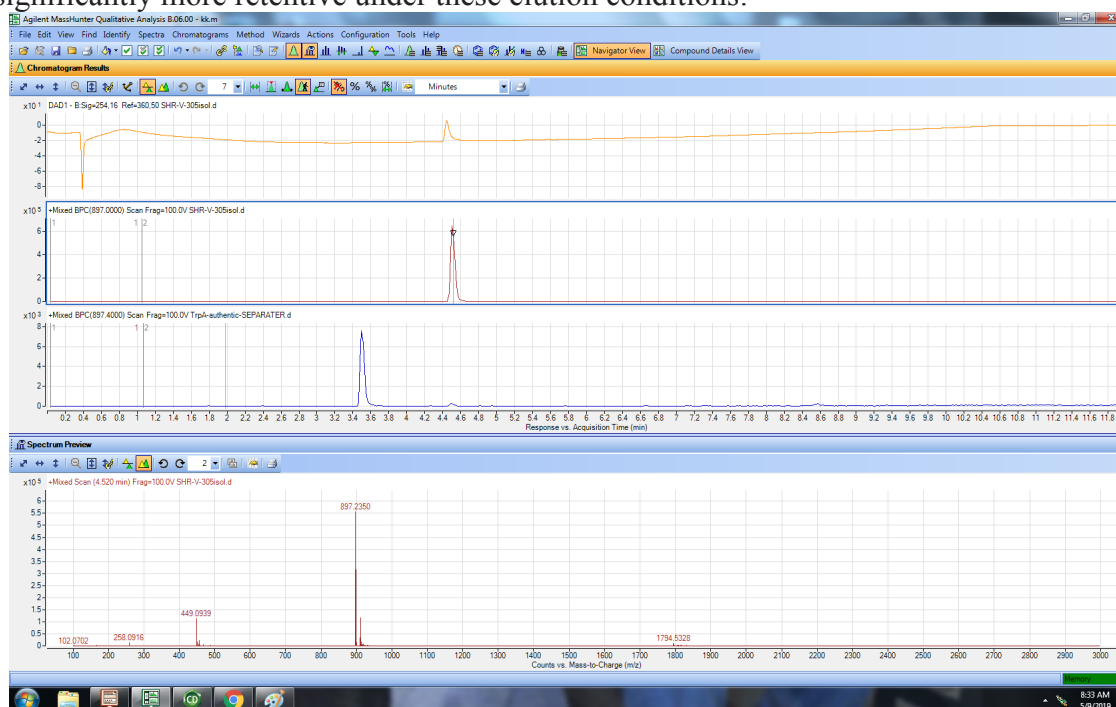

# **NMR spectra:**

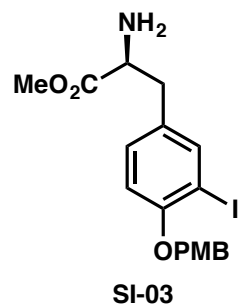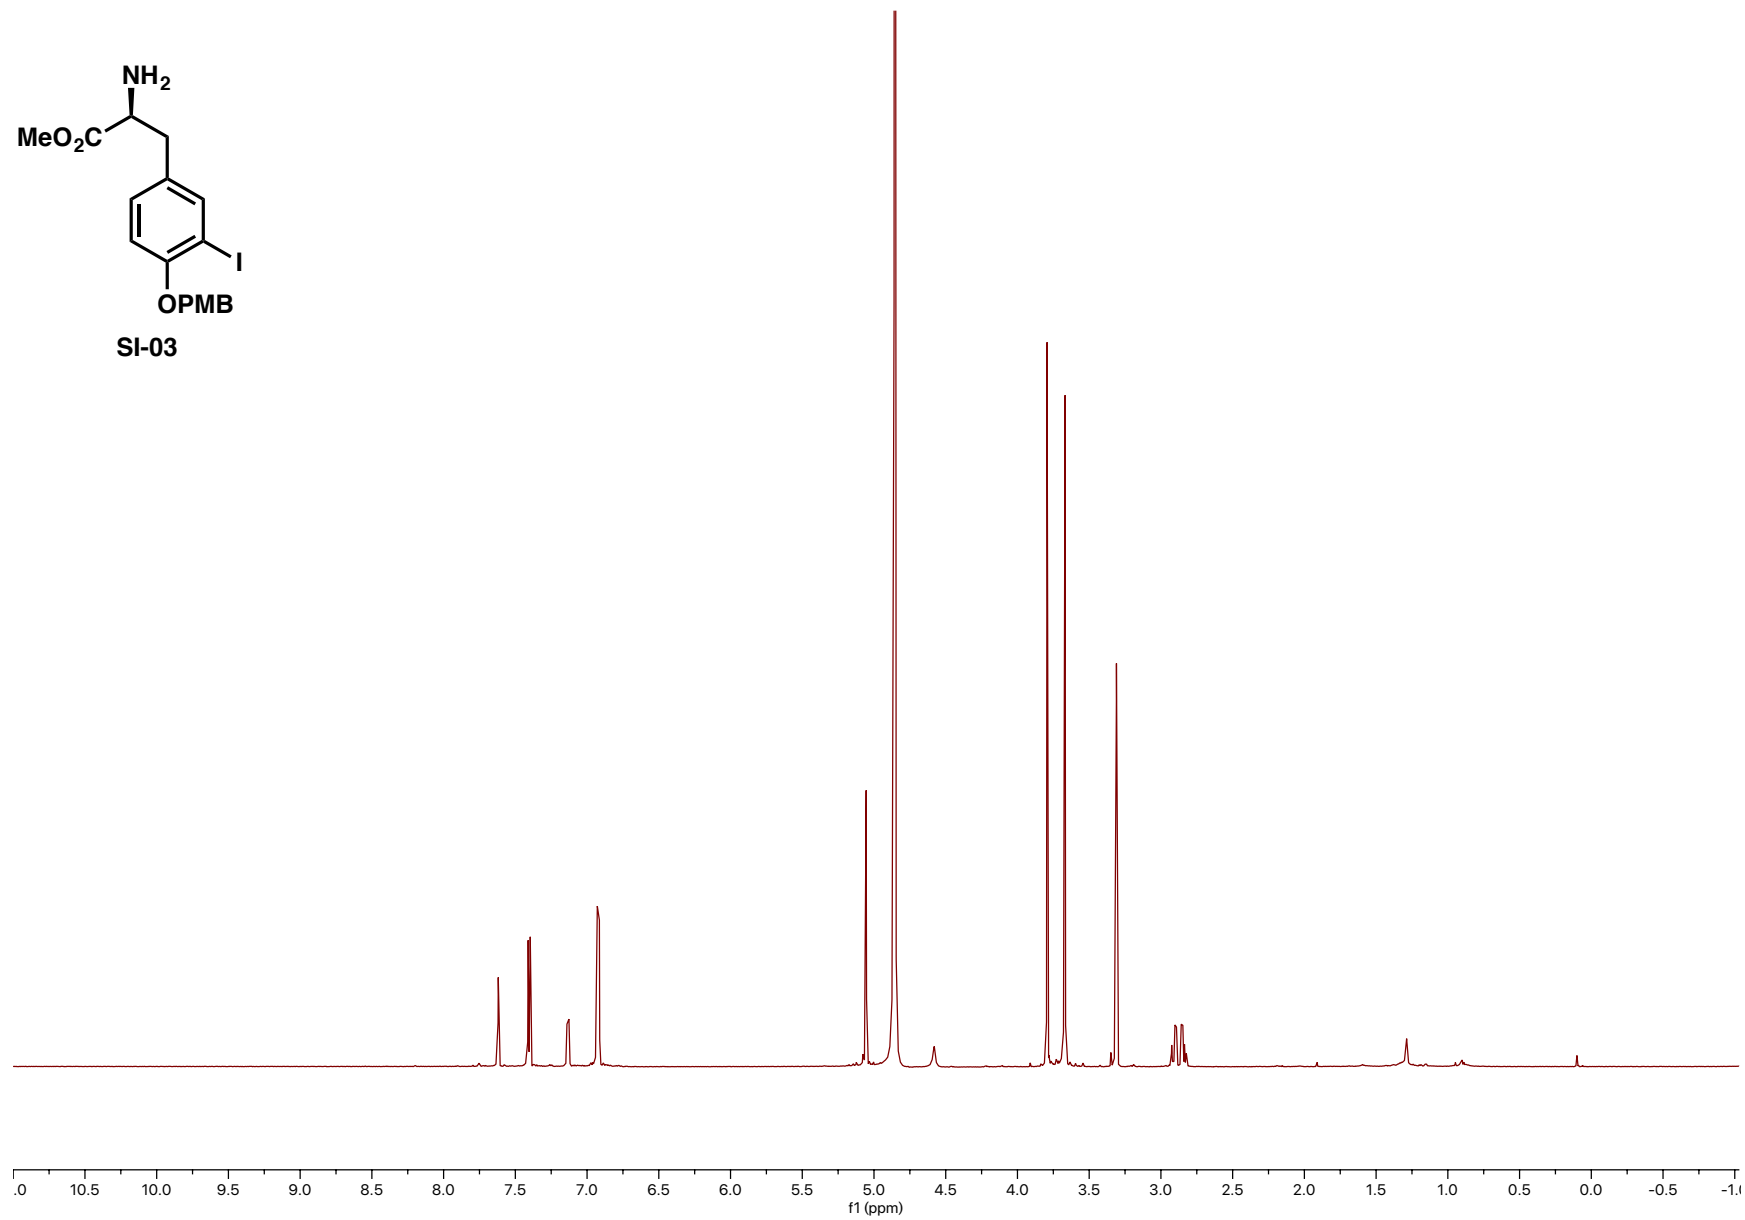

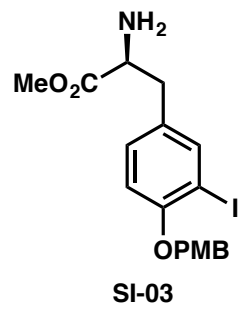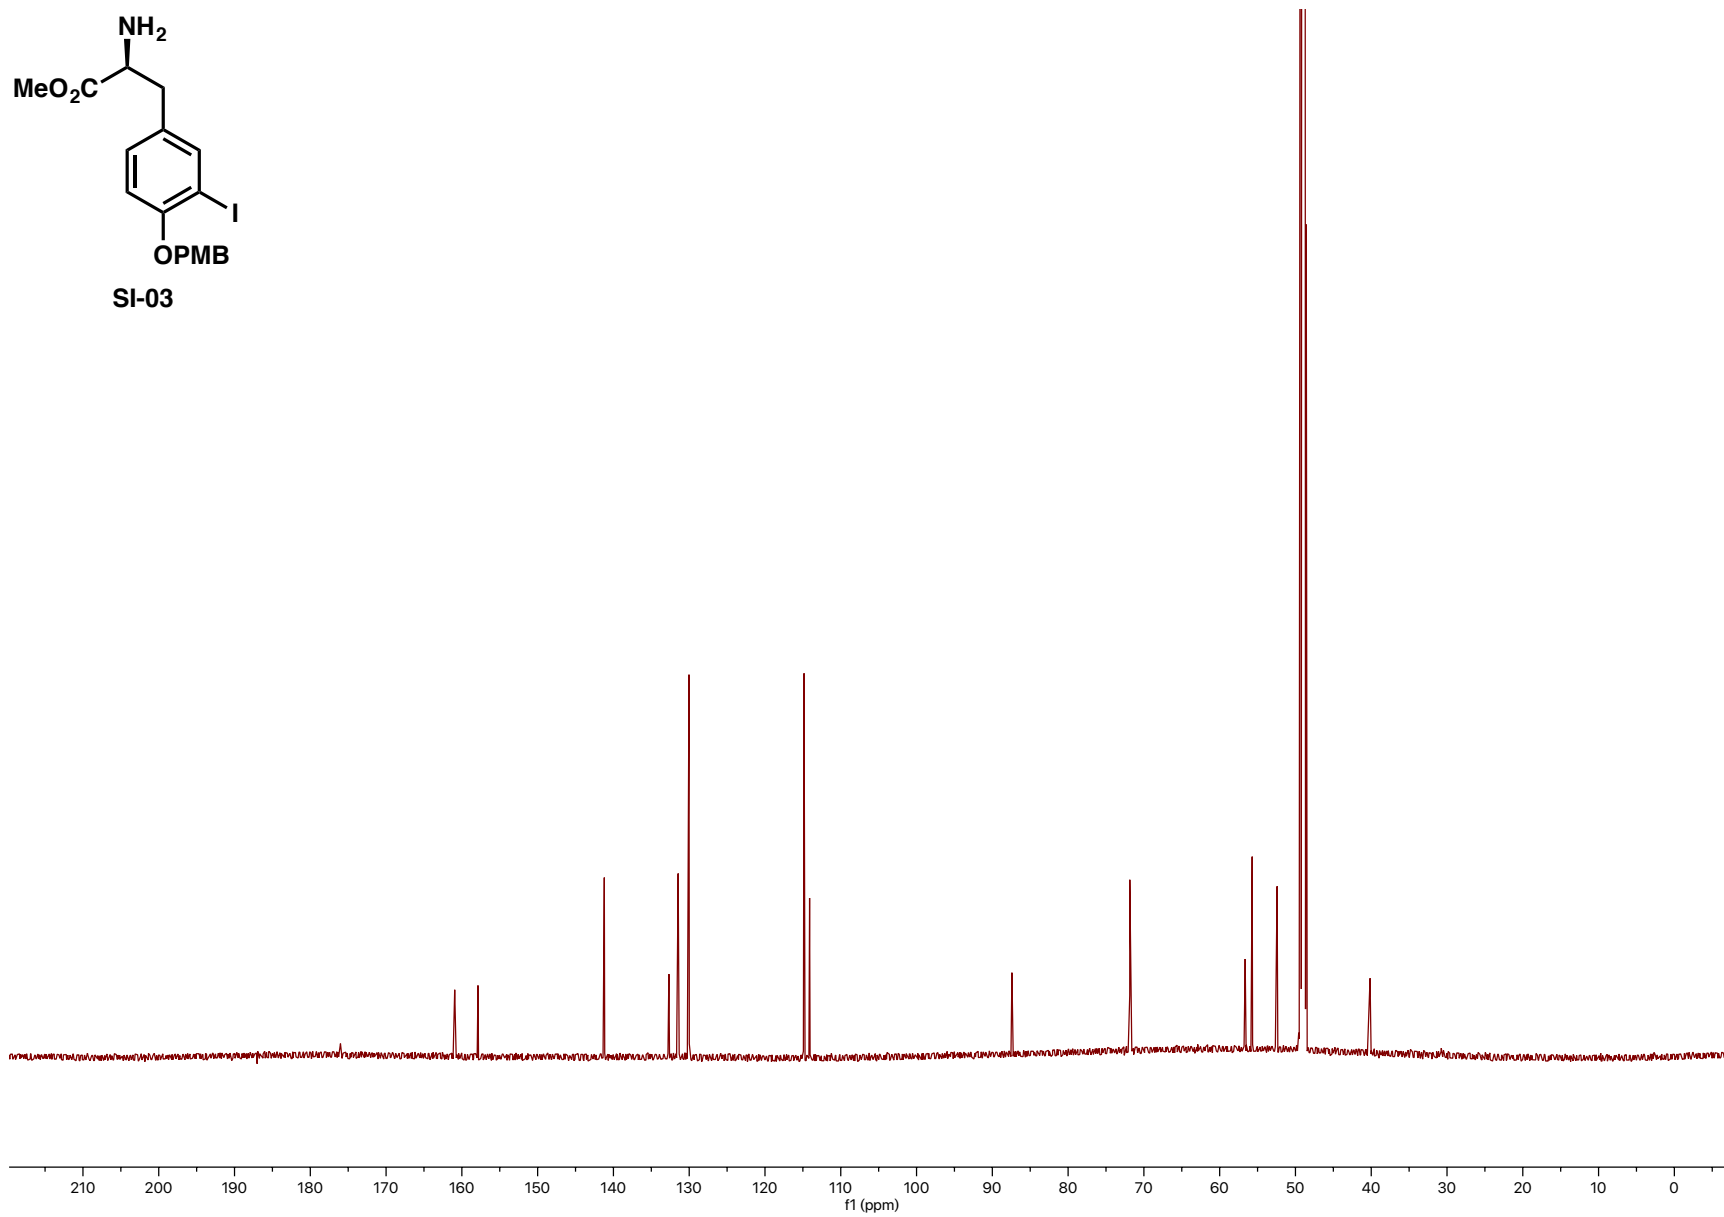



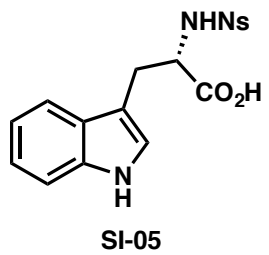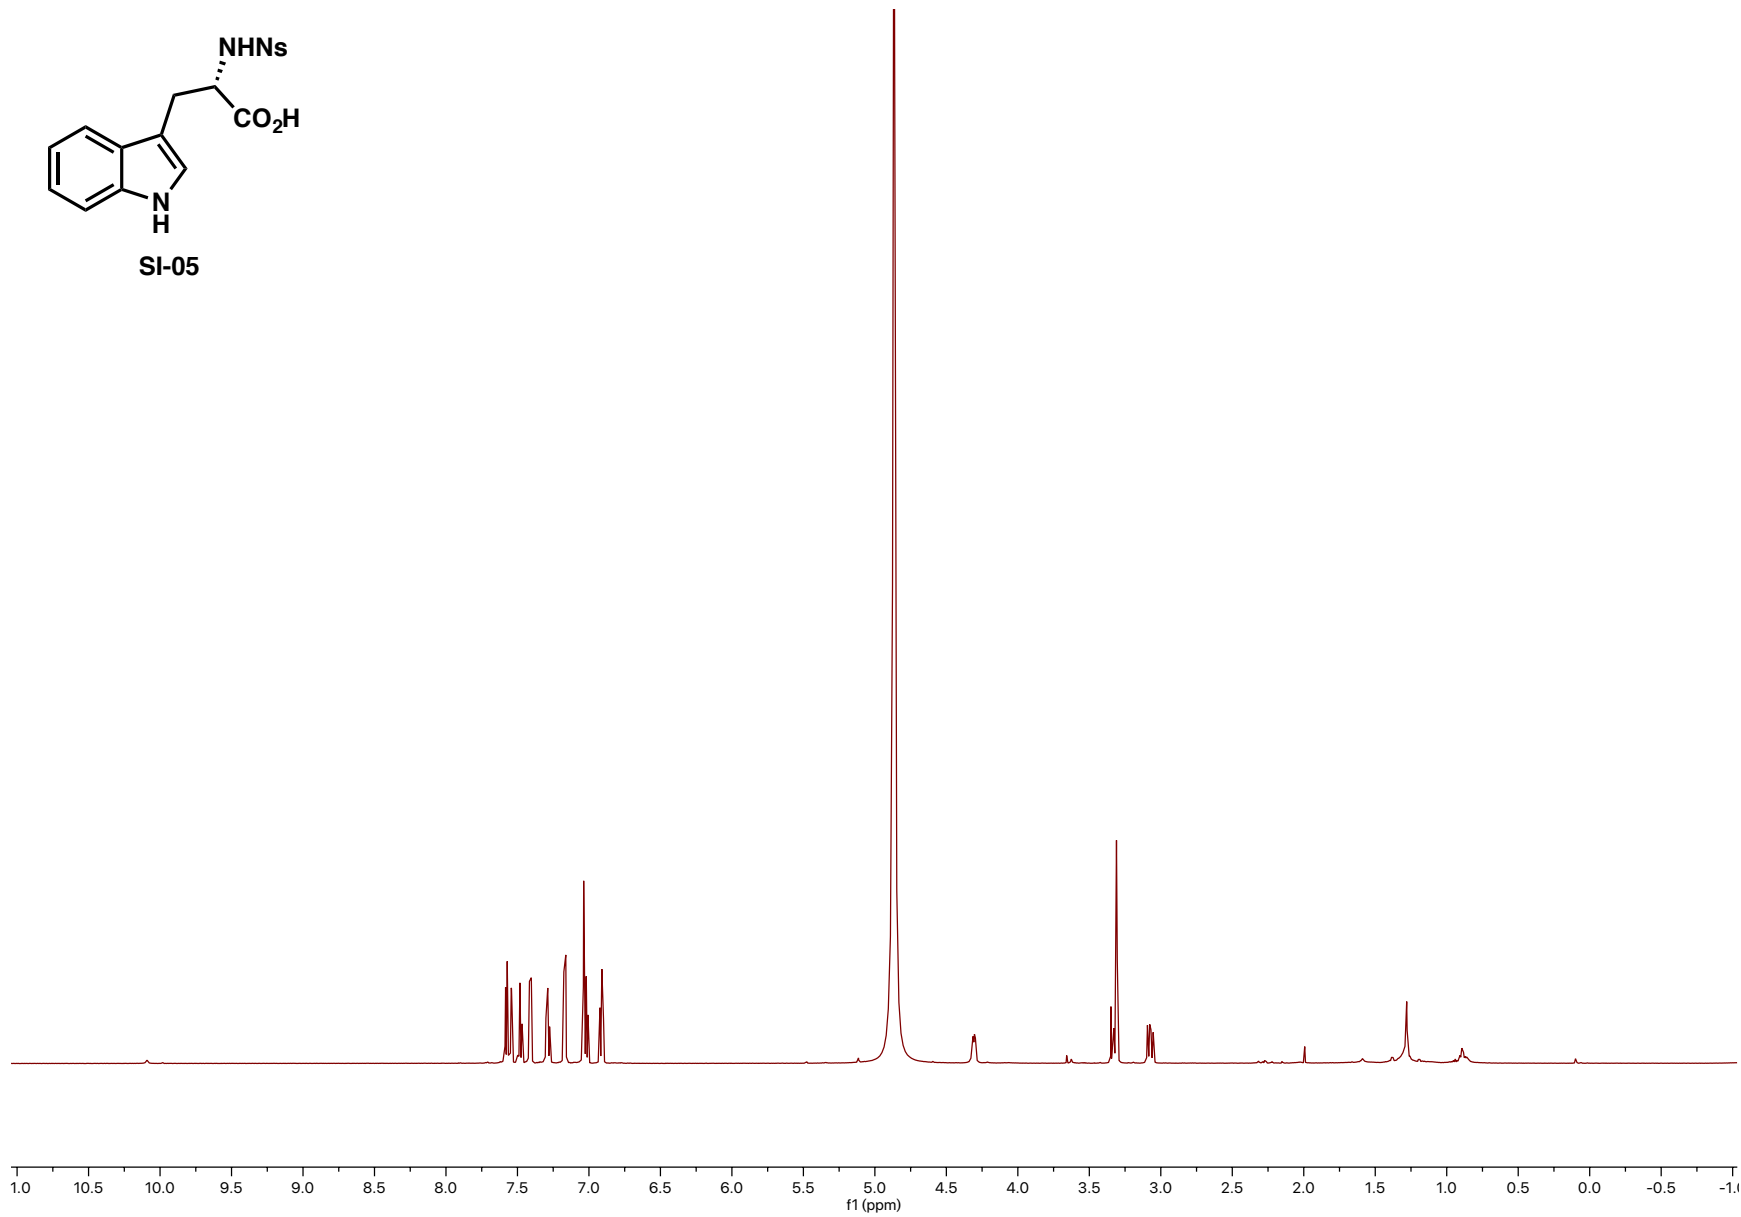

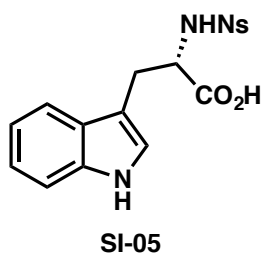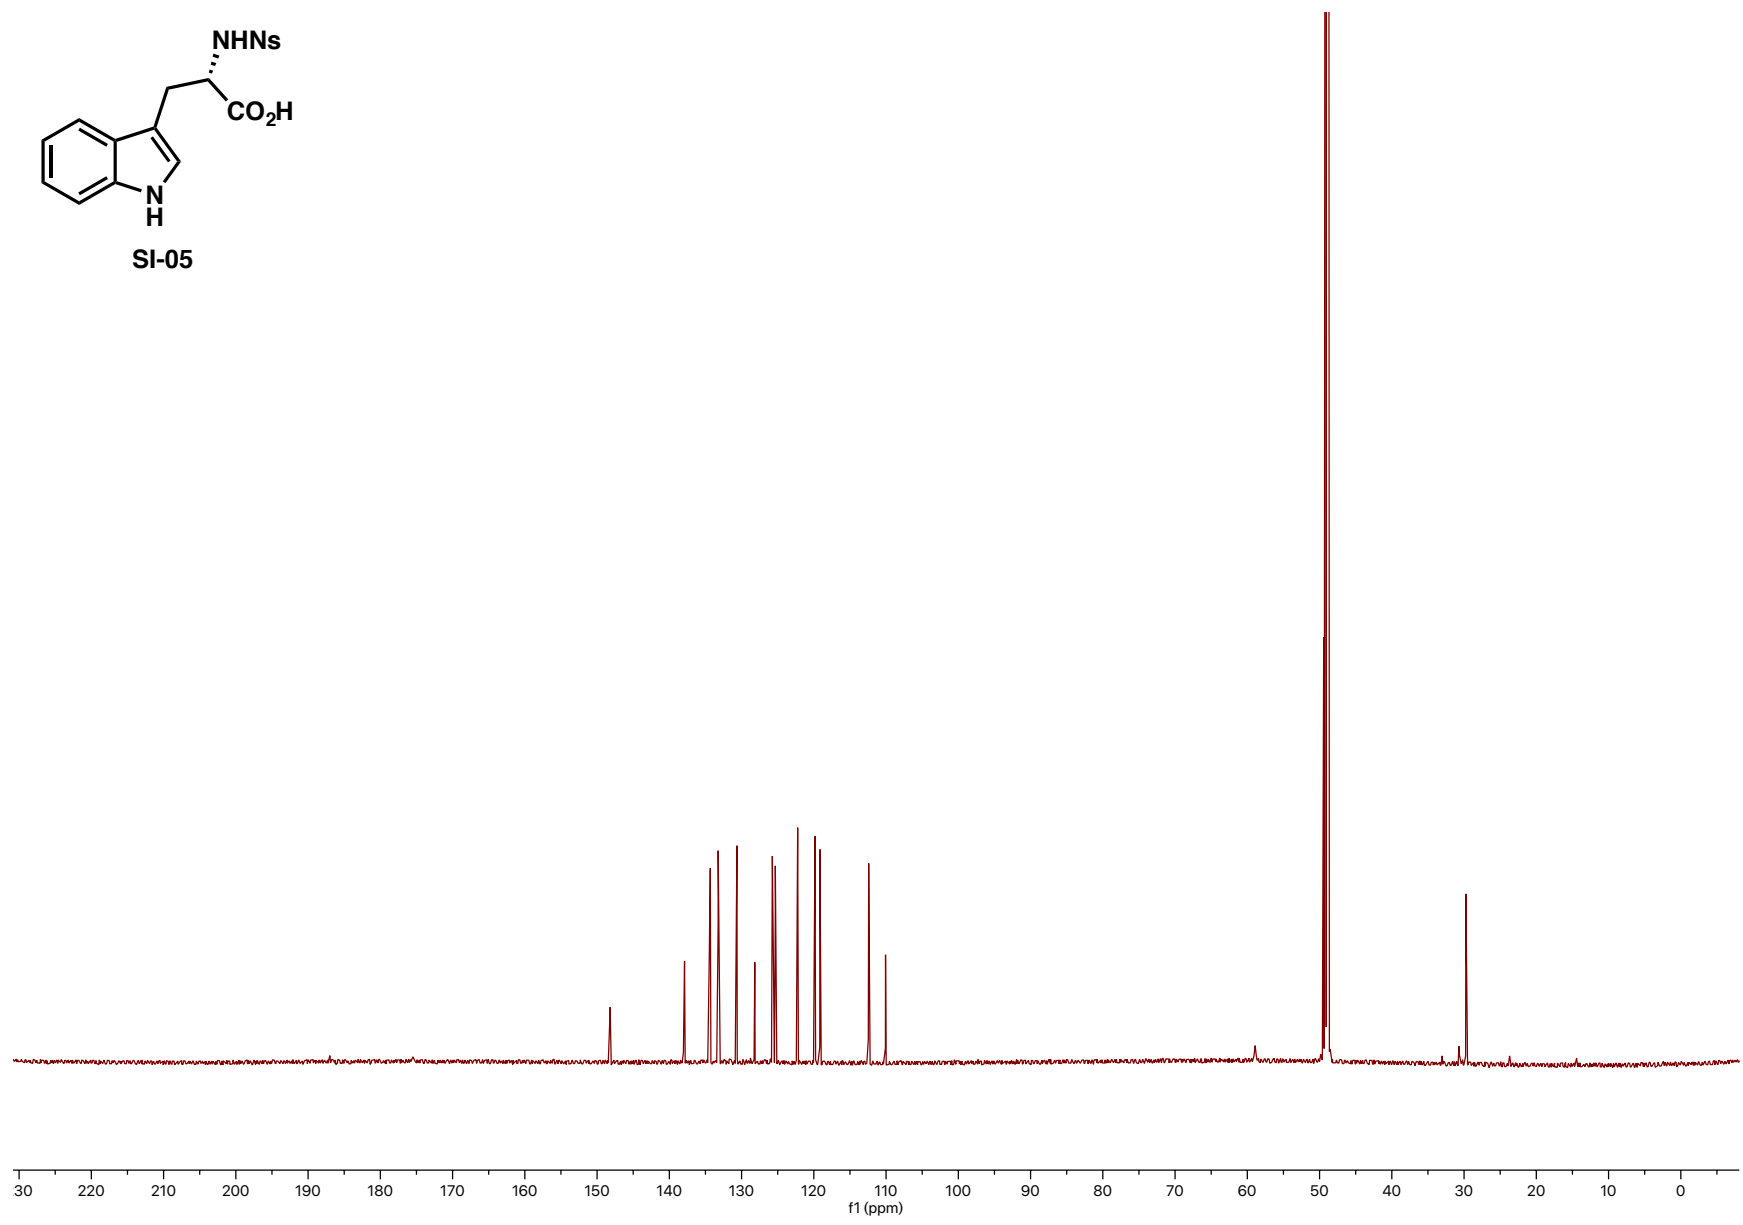

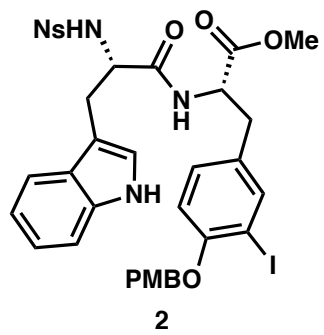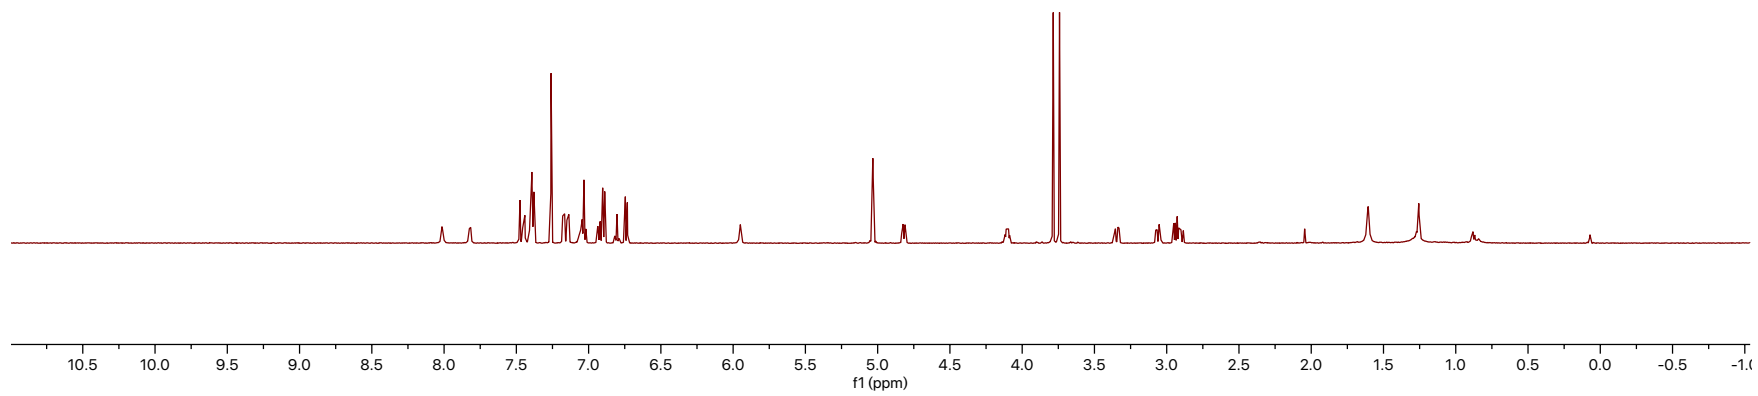

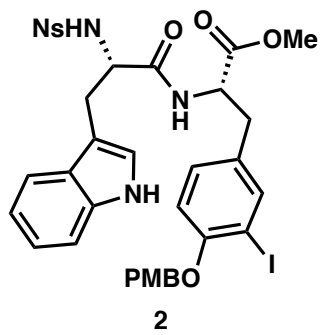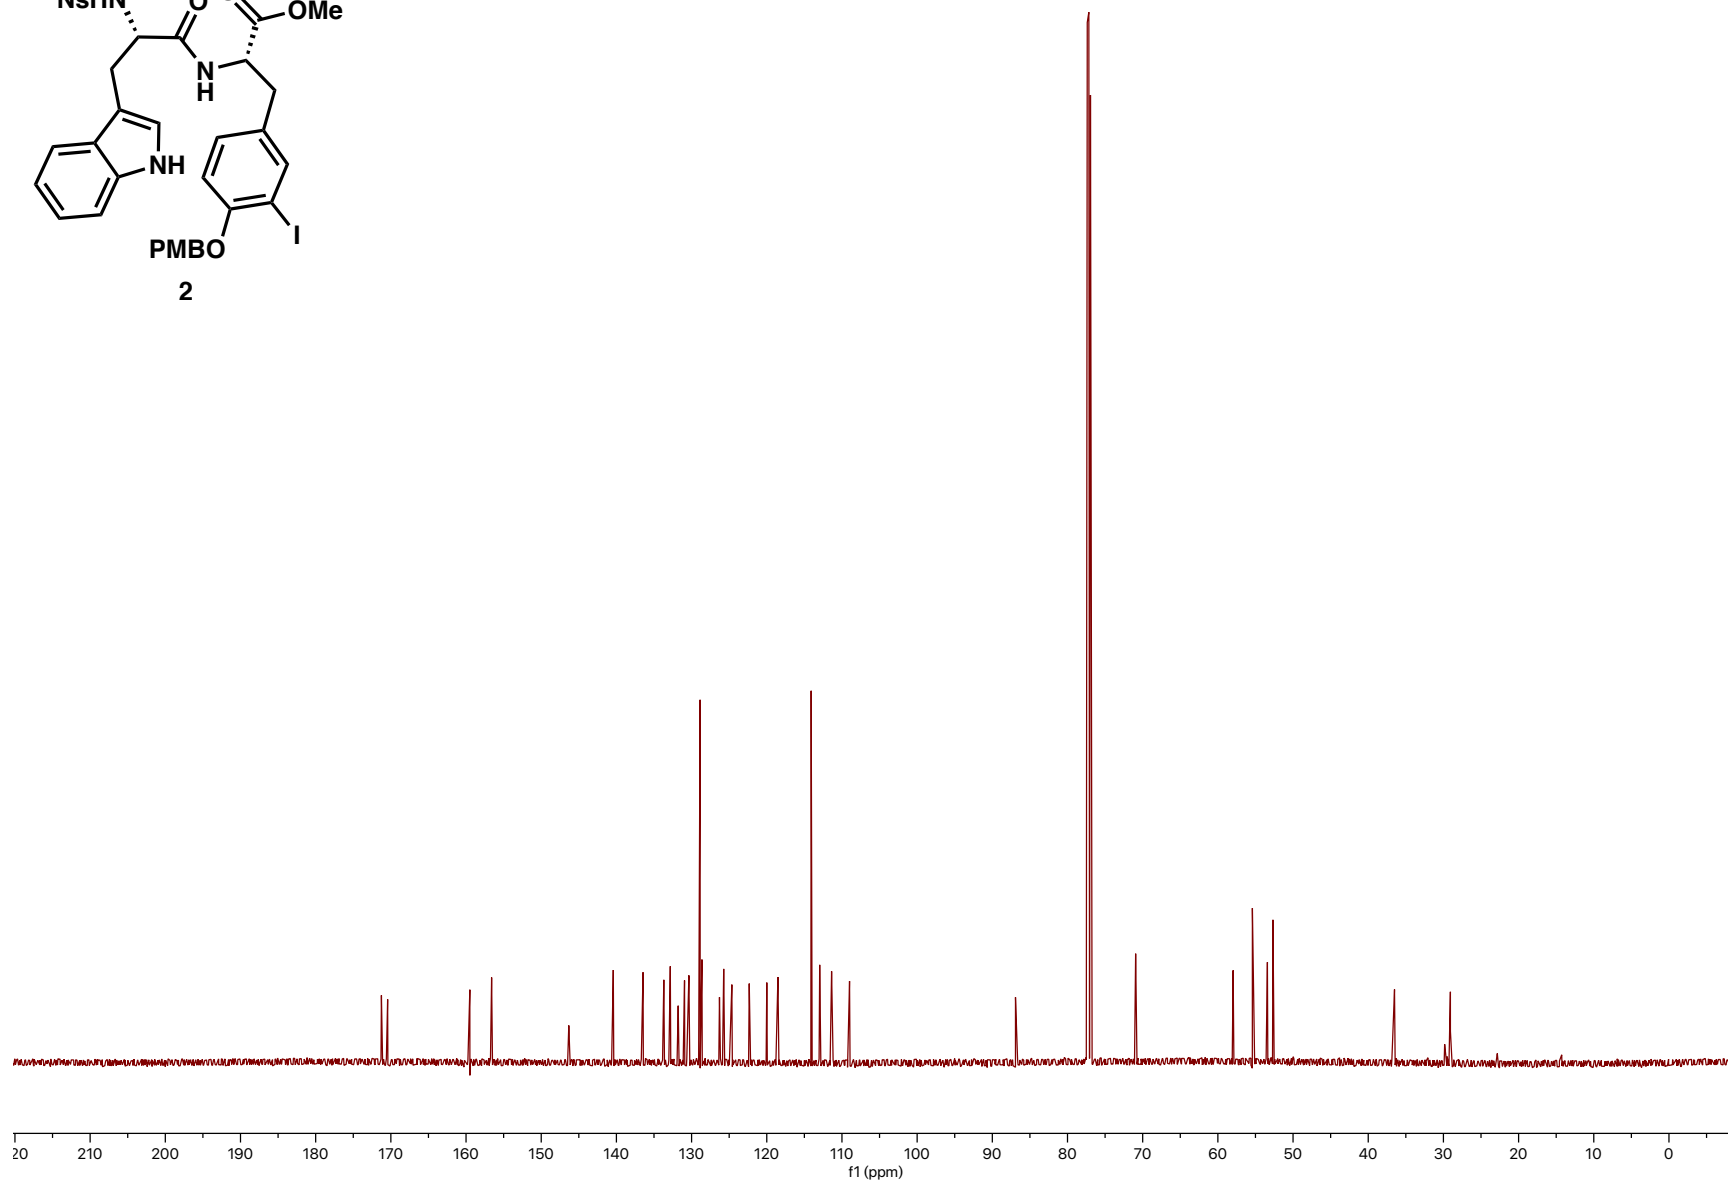

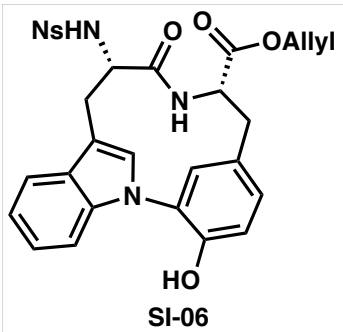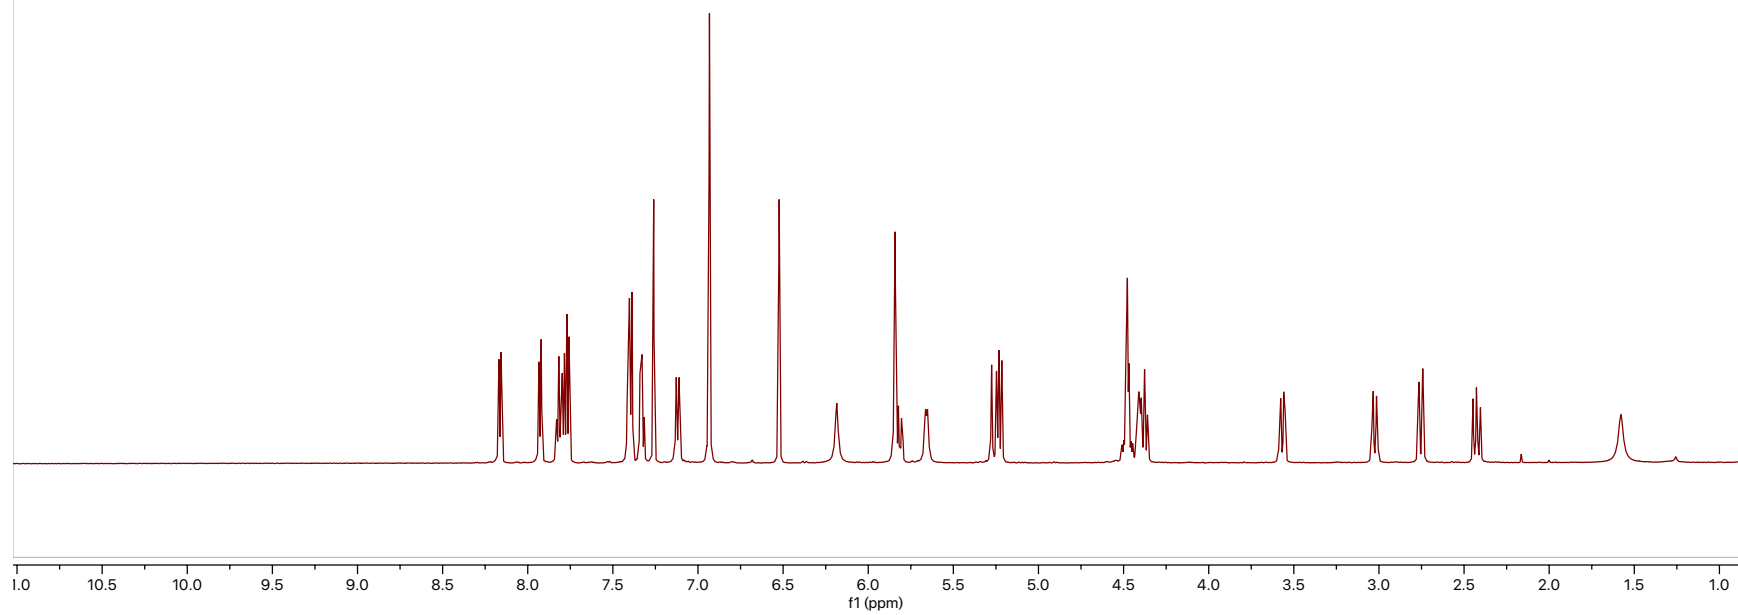

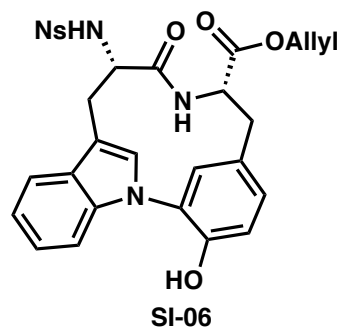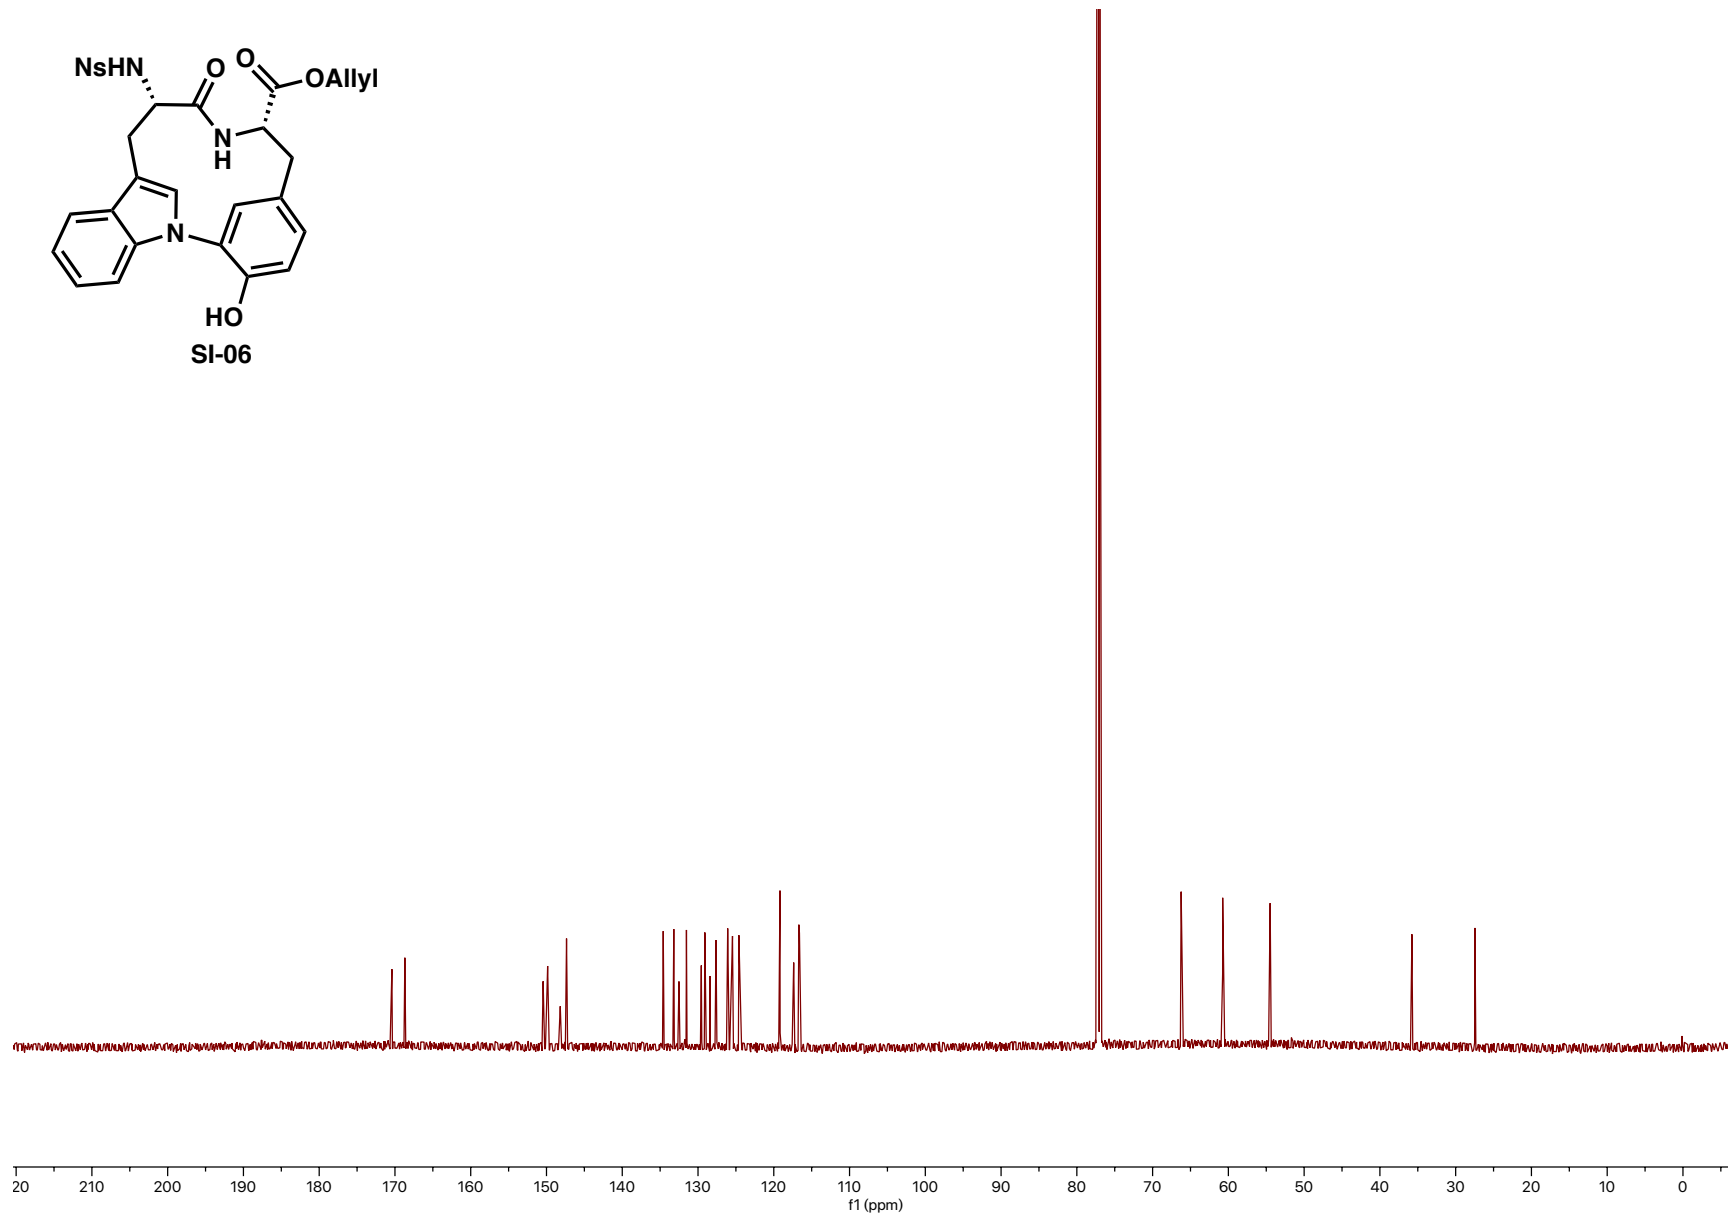

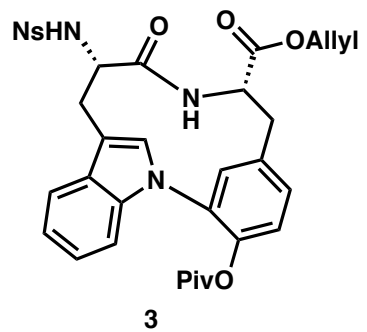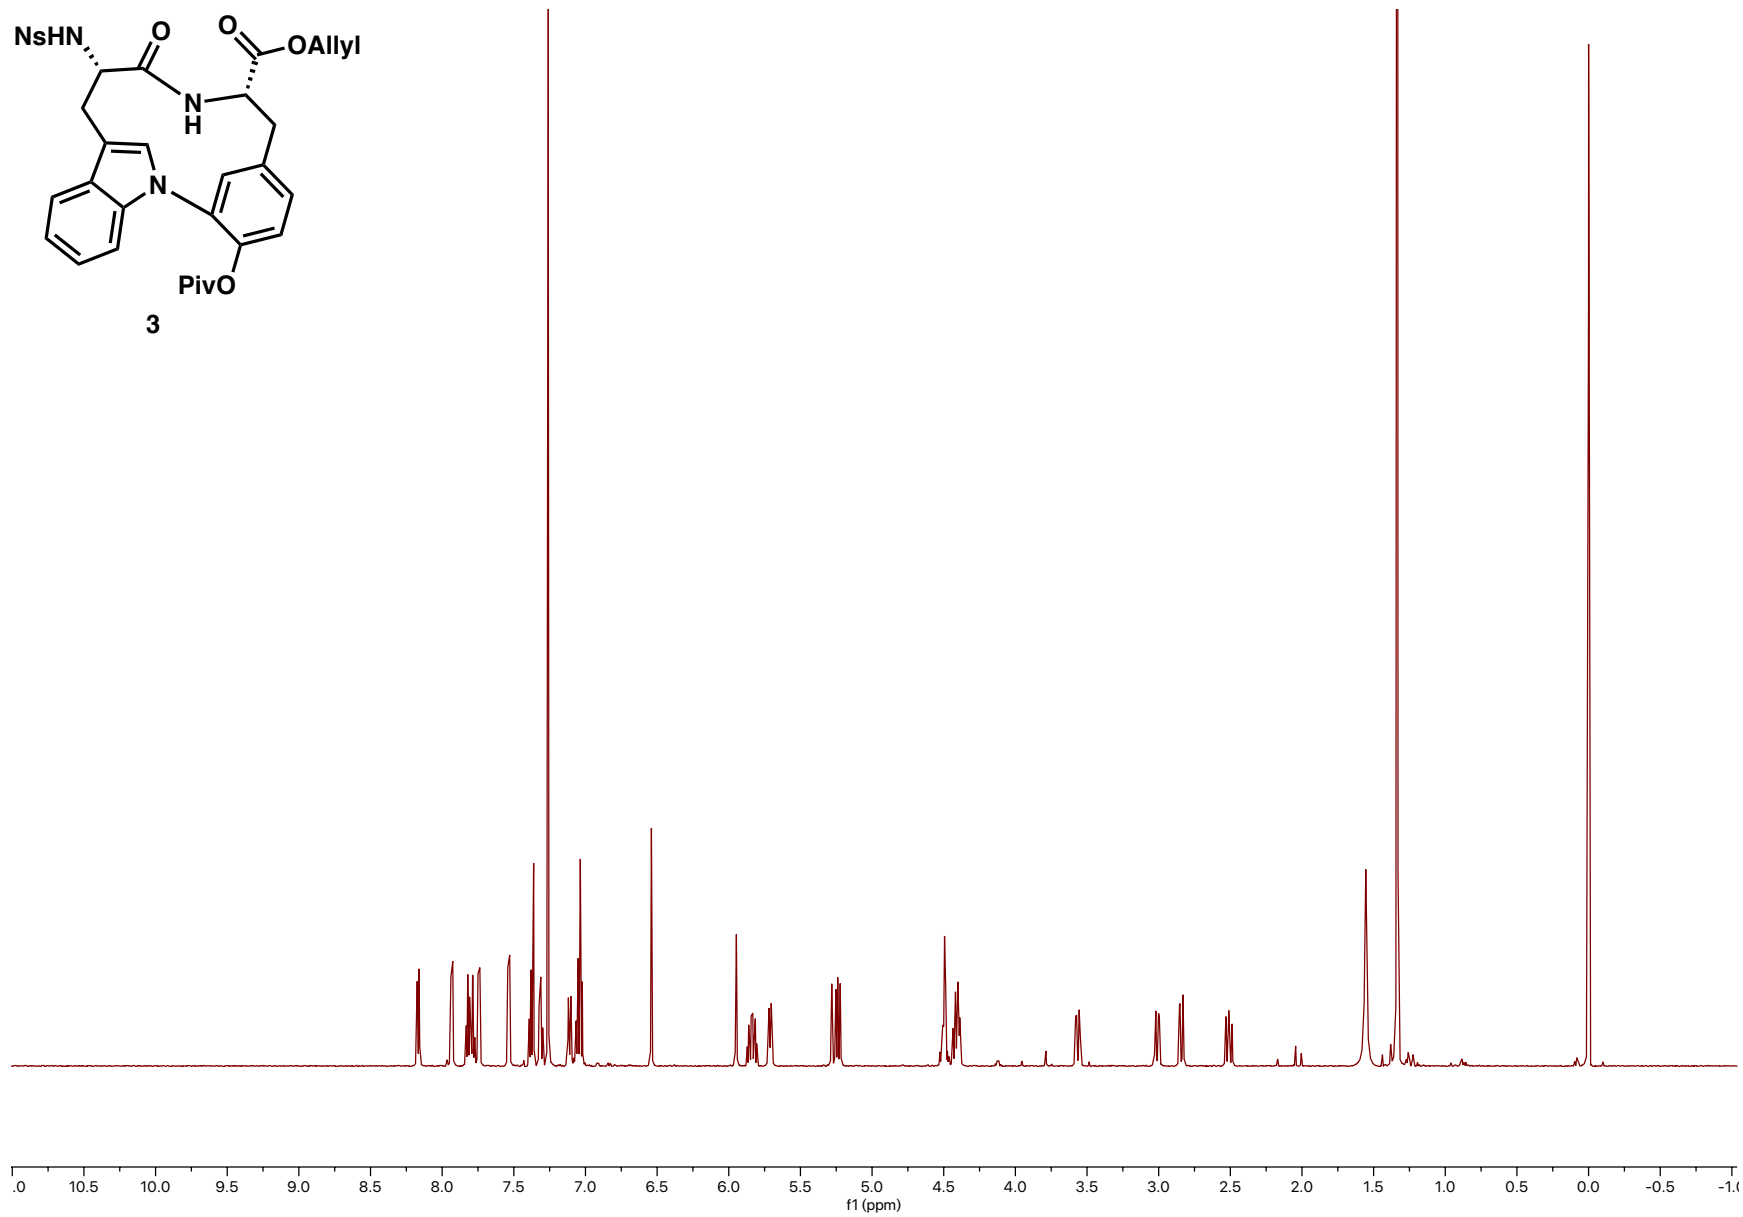

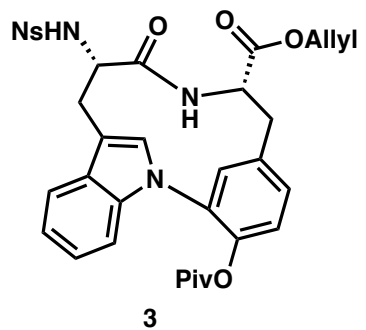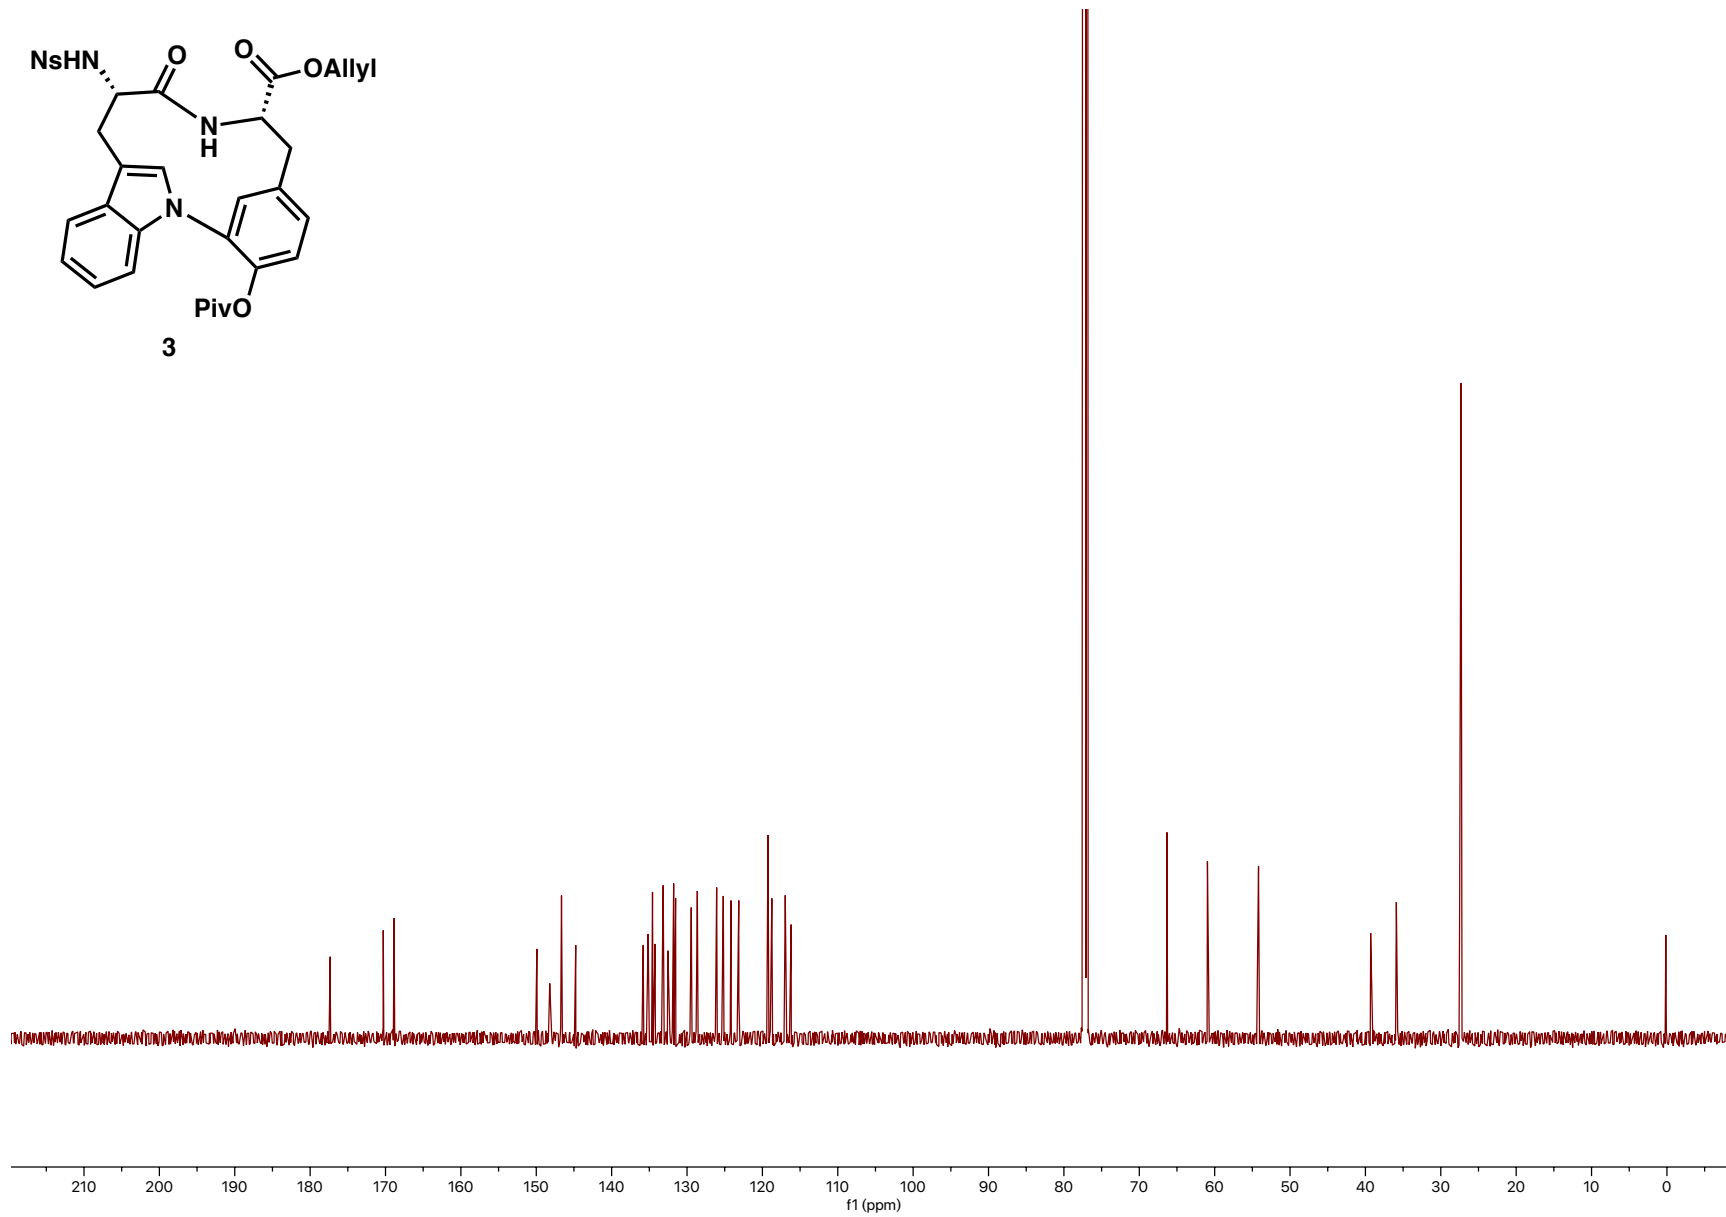



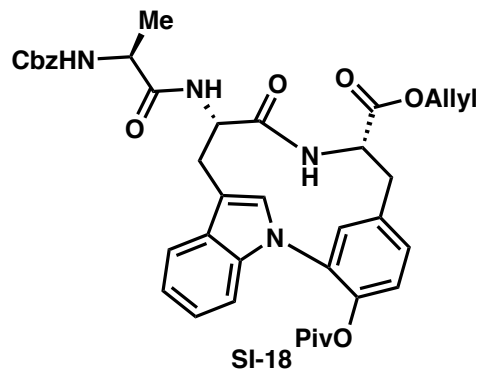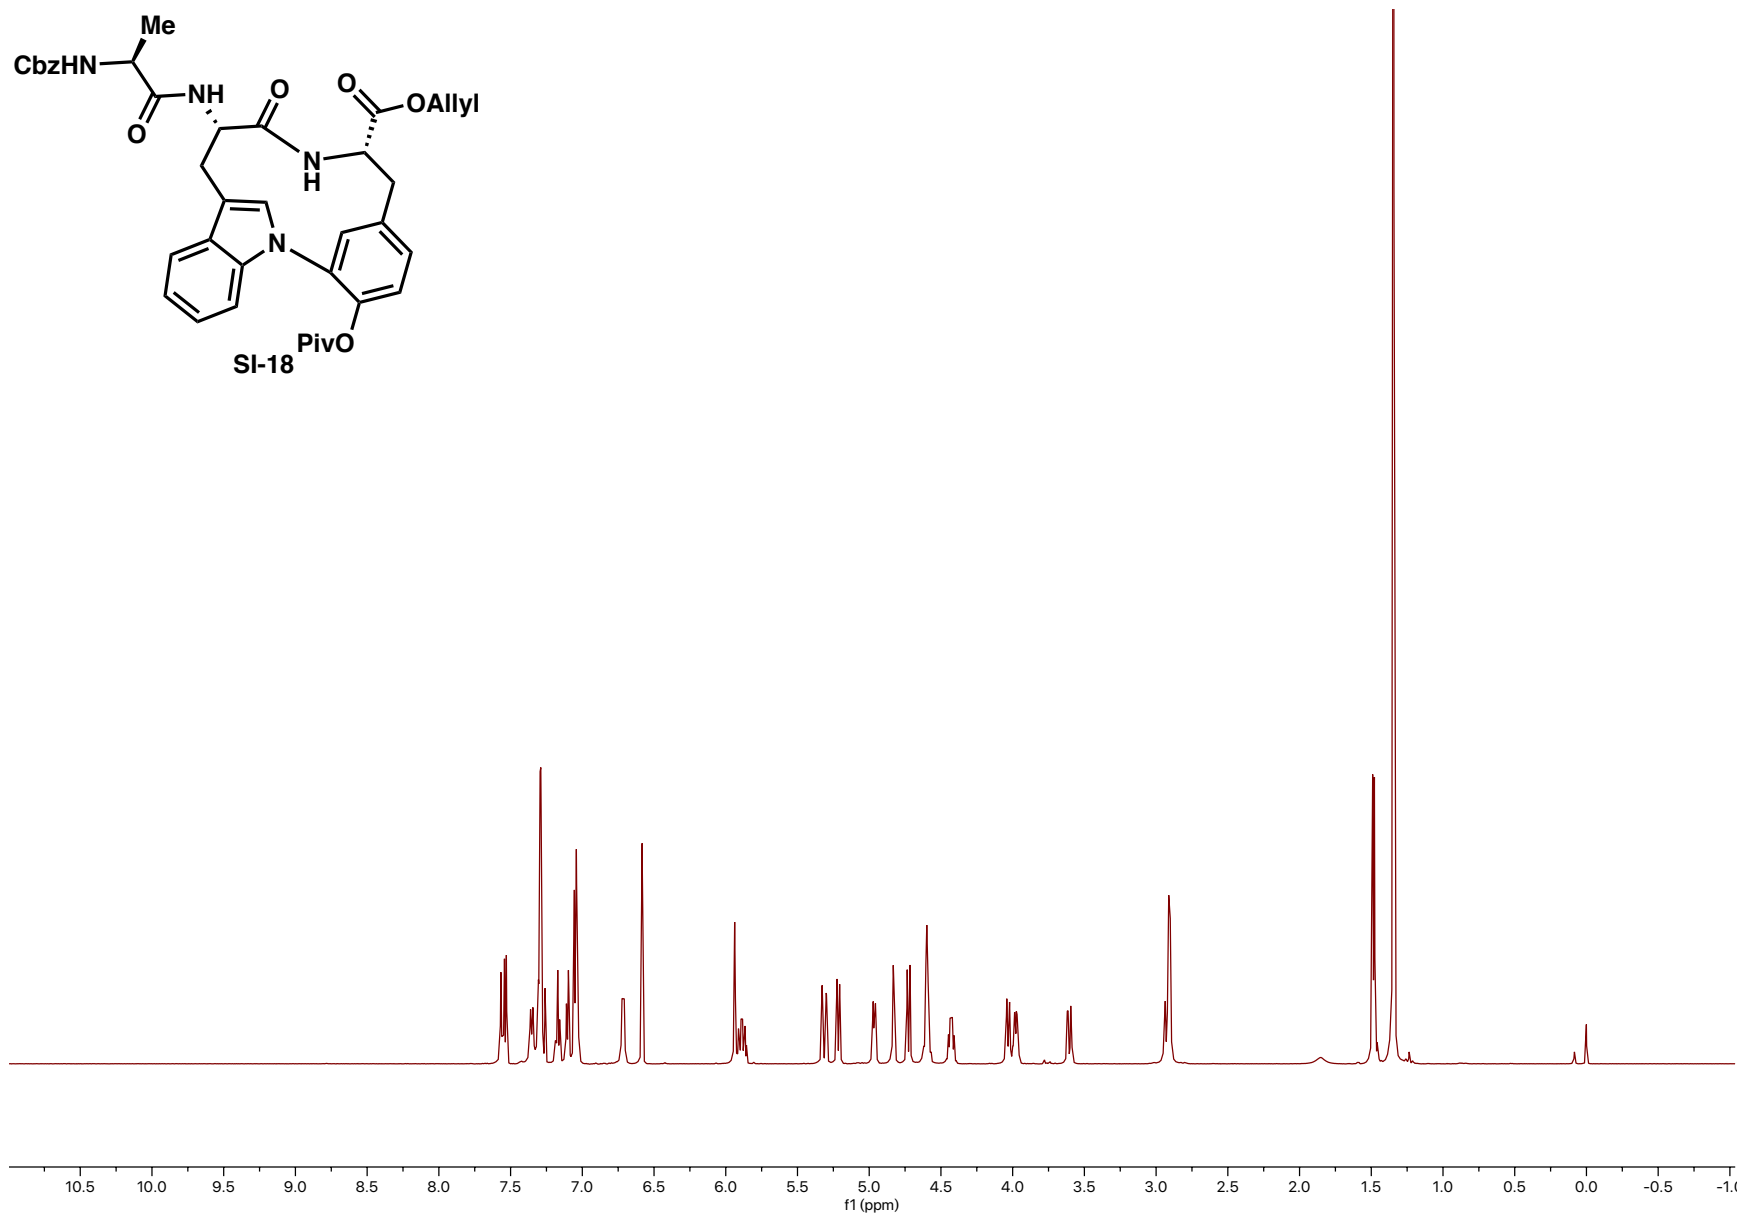

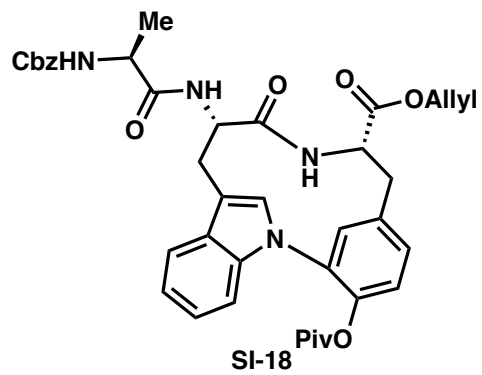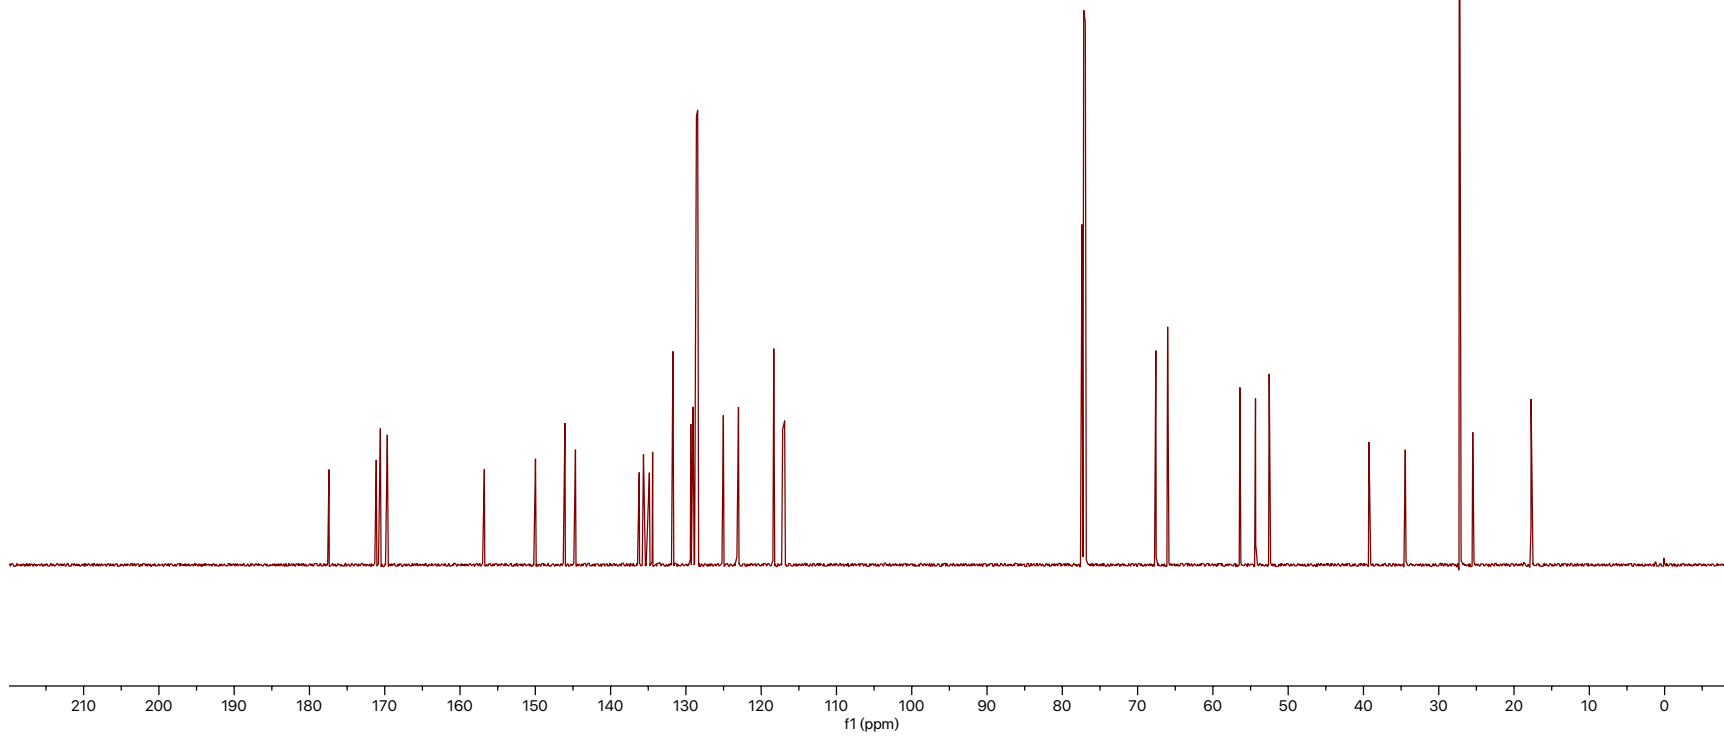

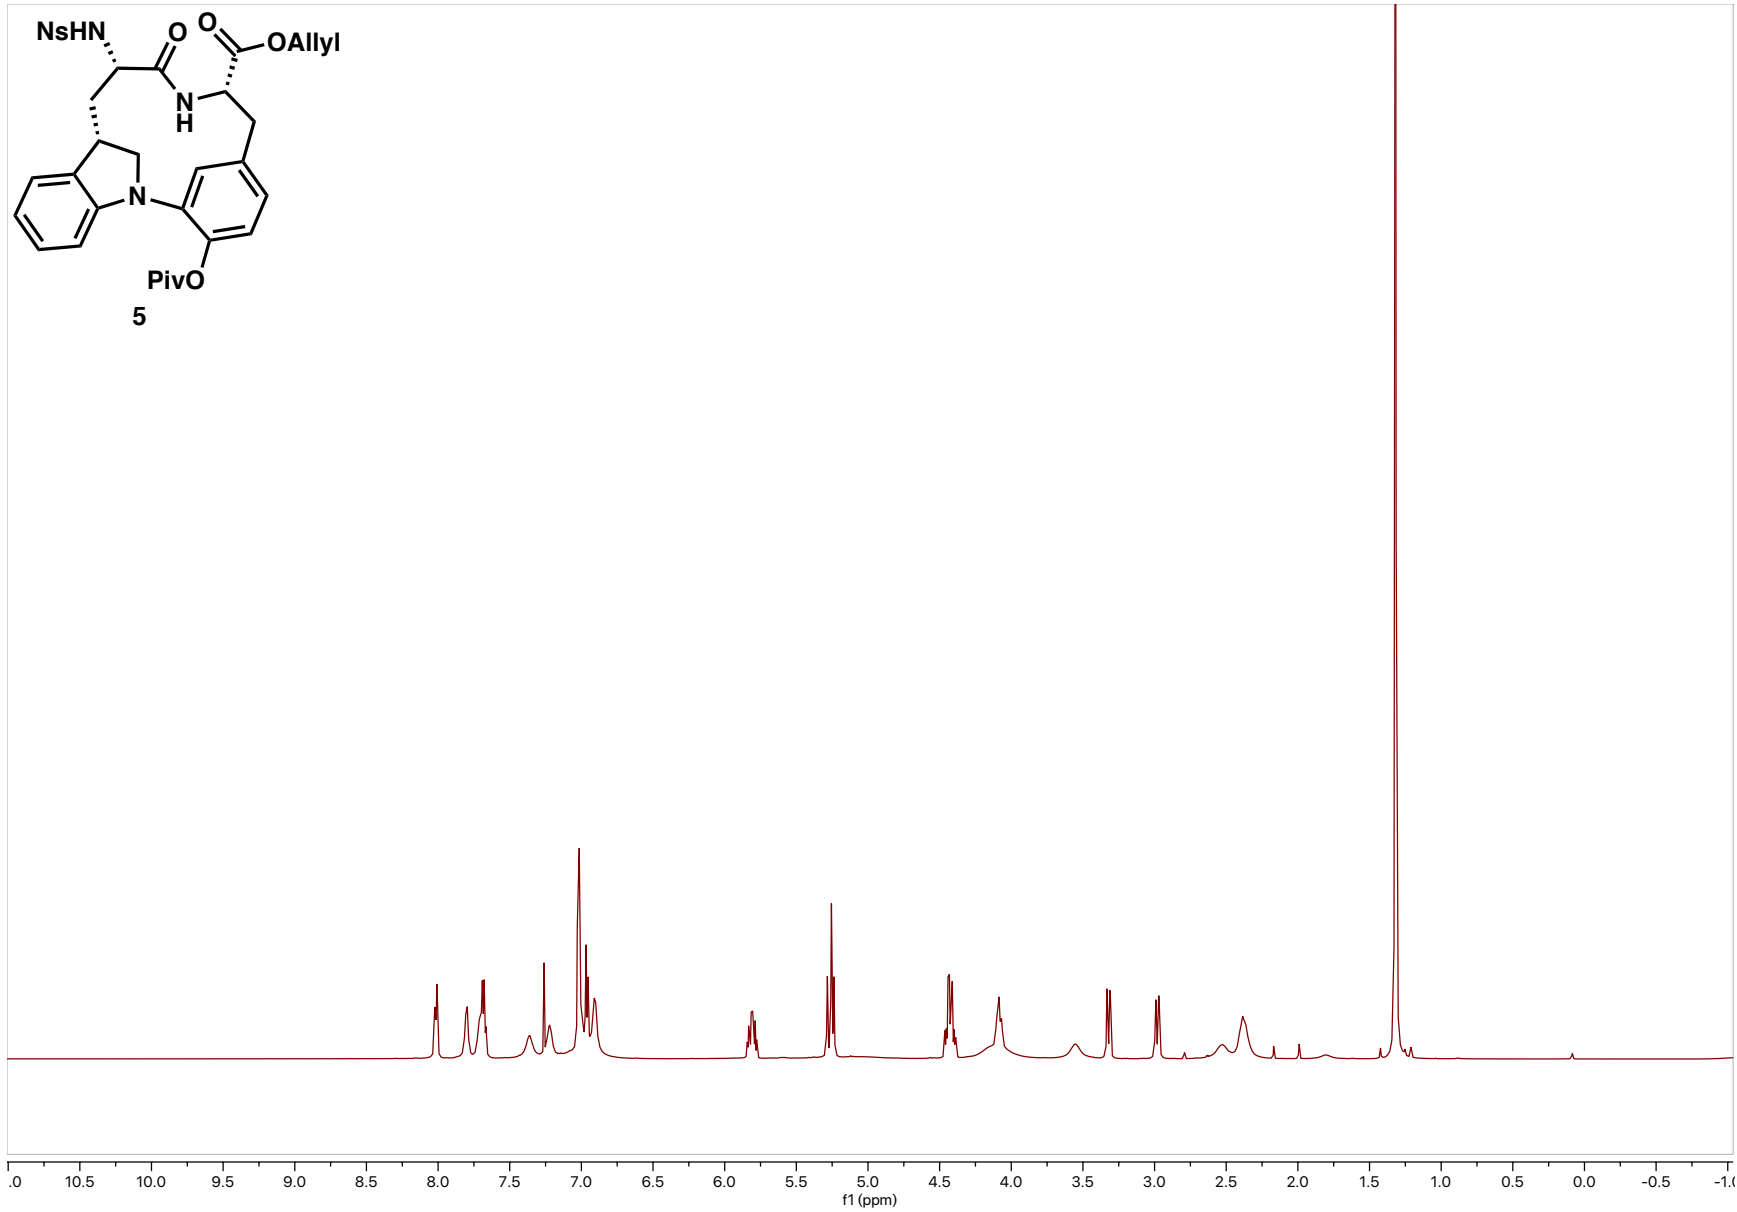

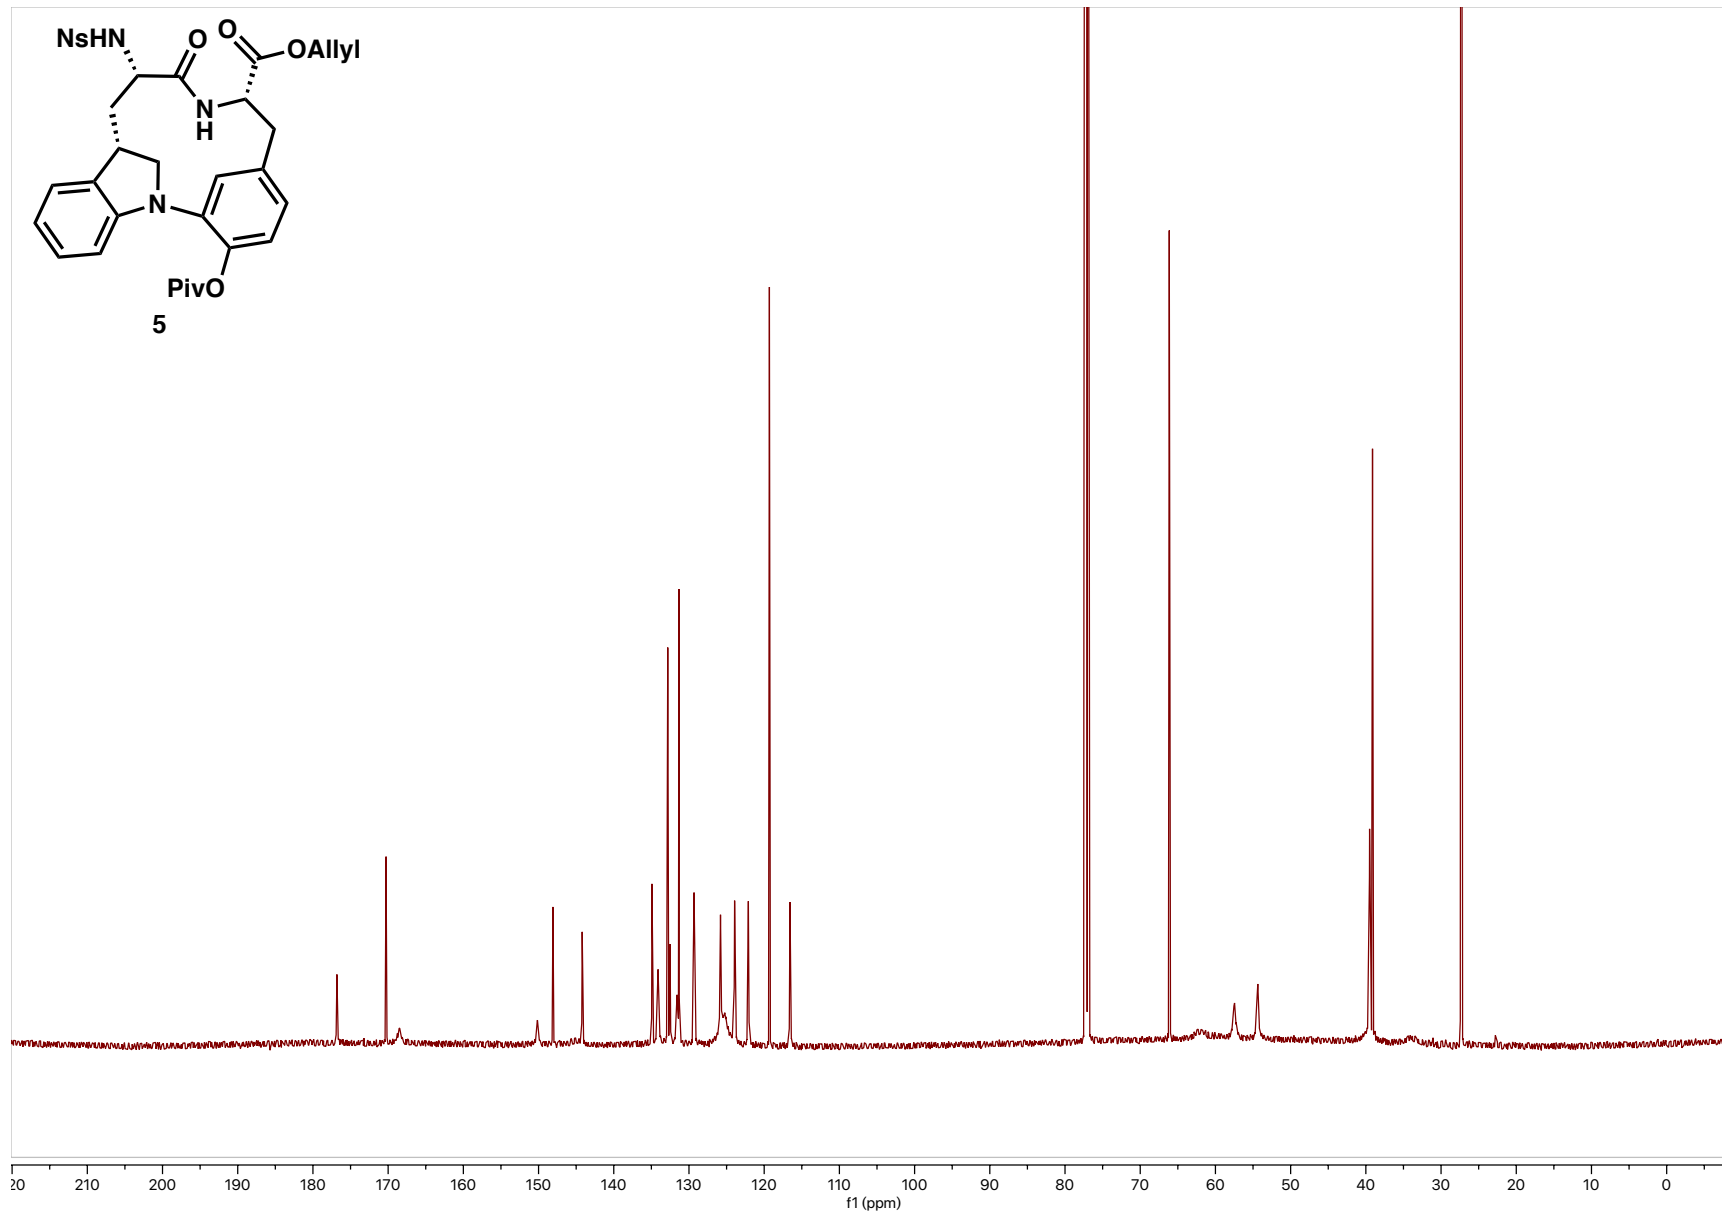

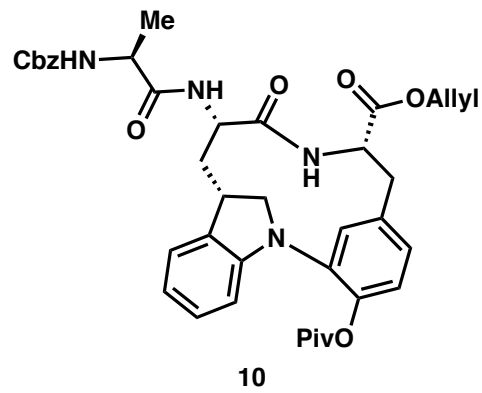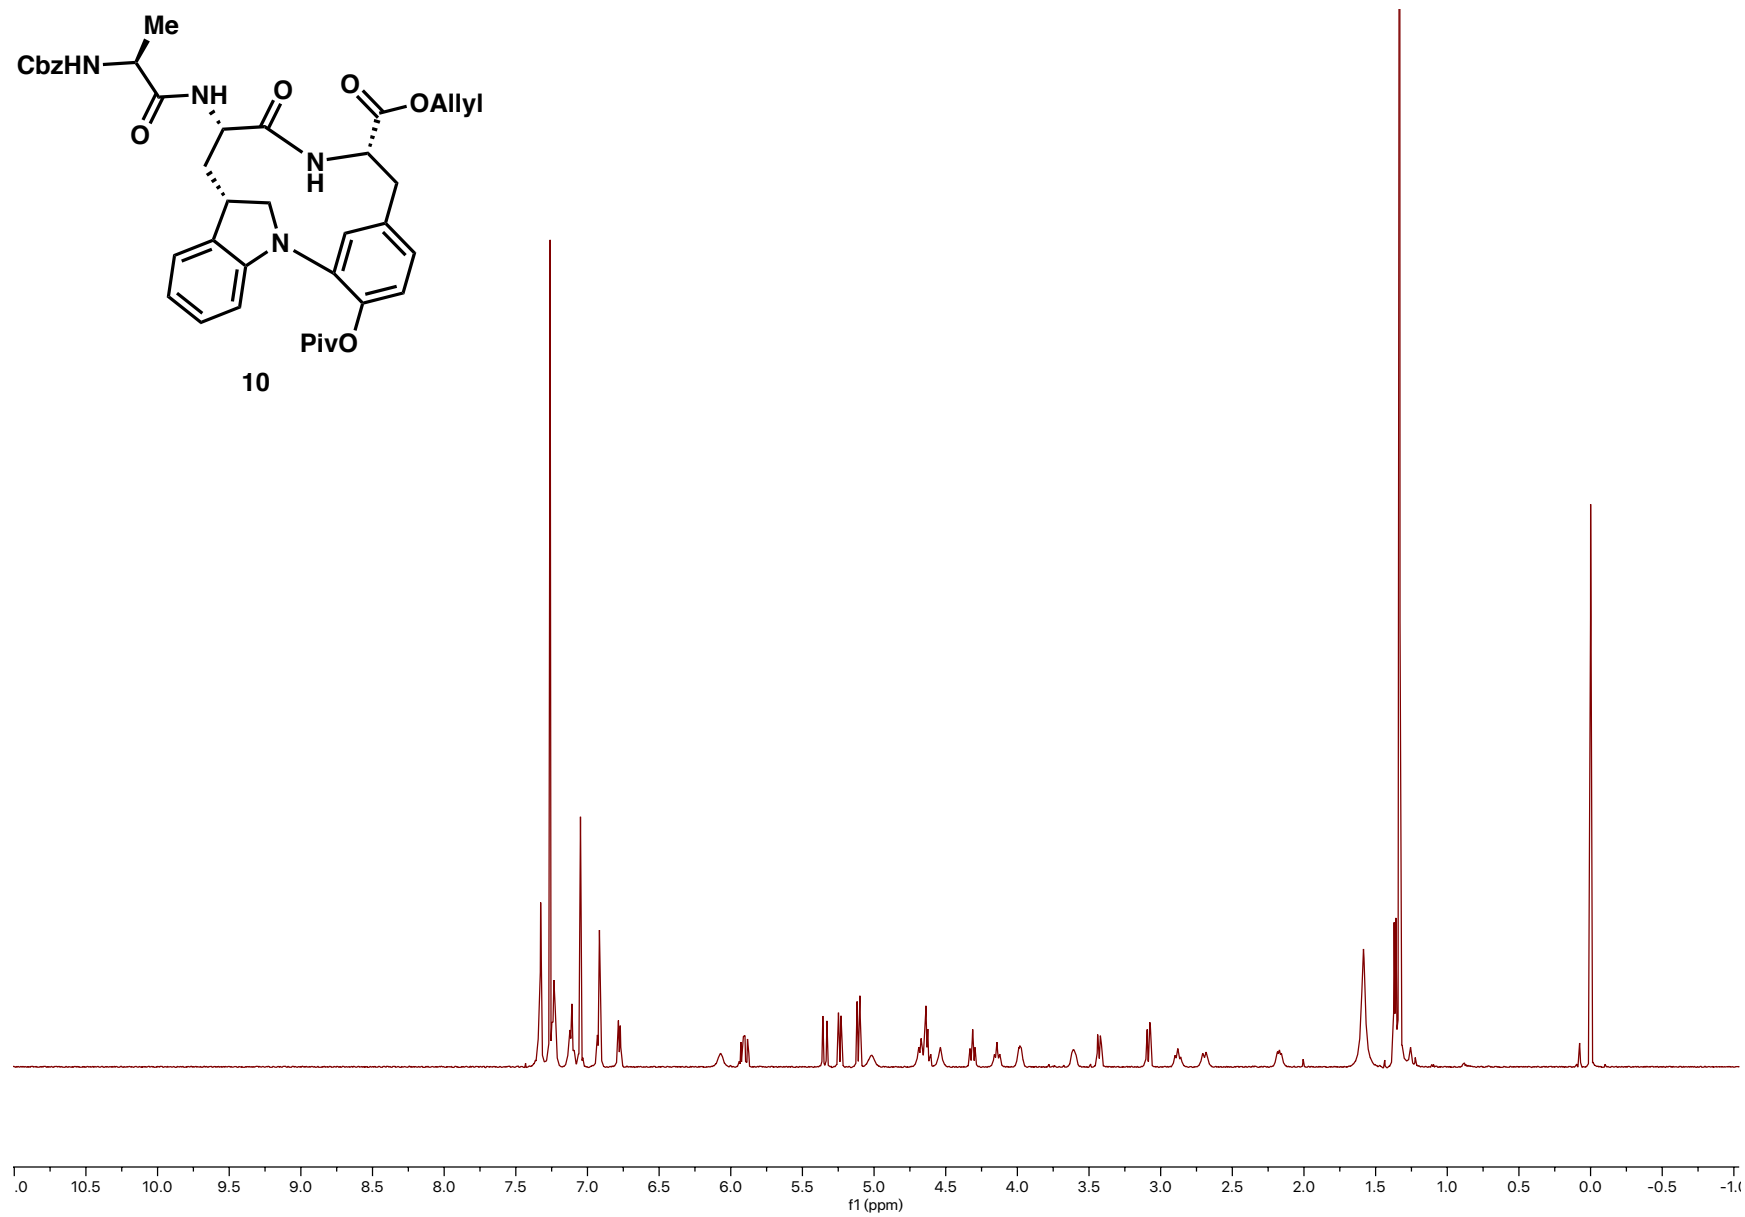

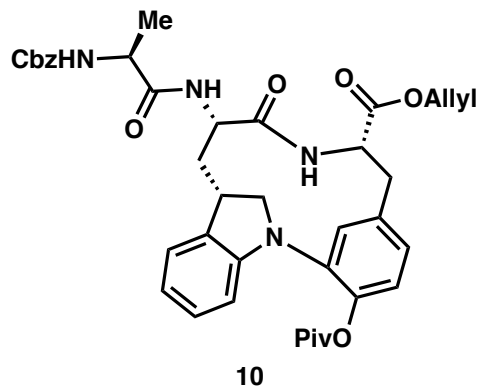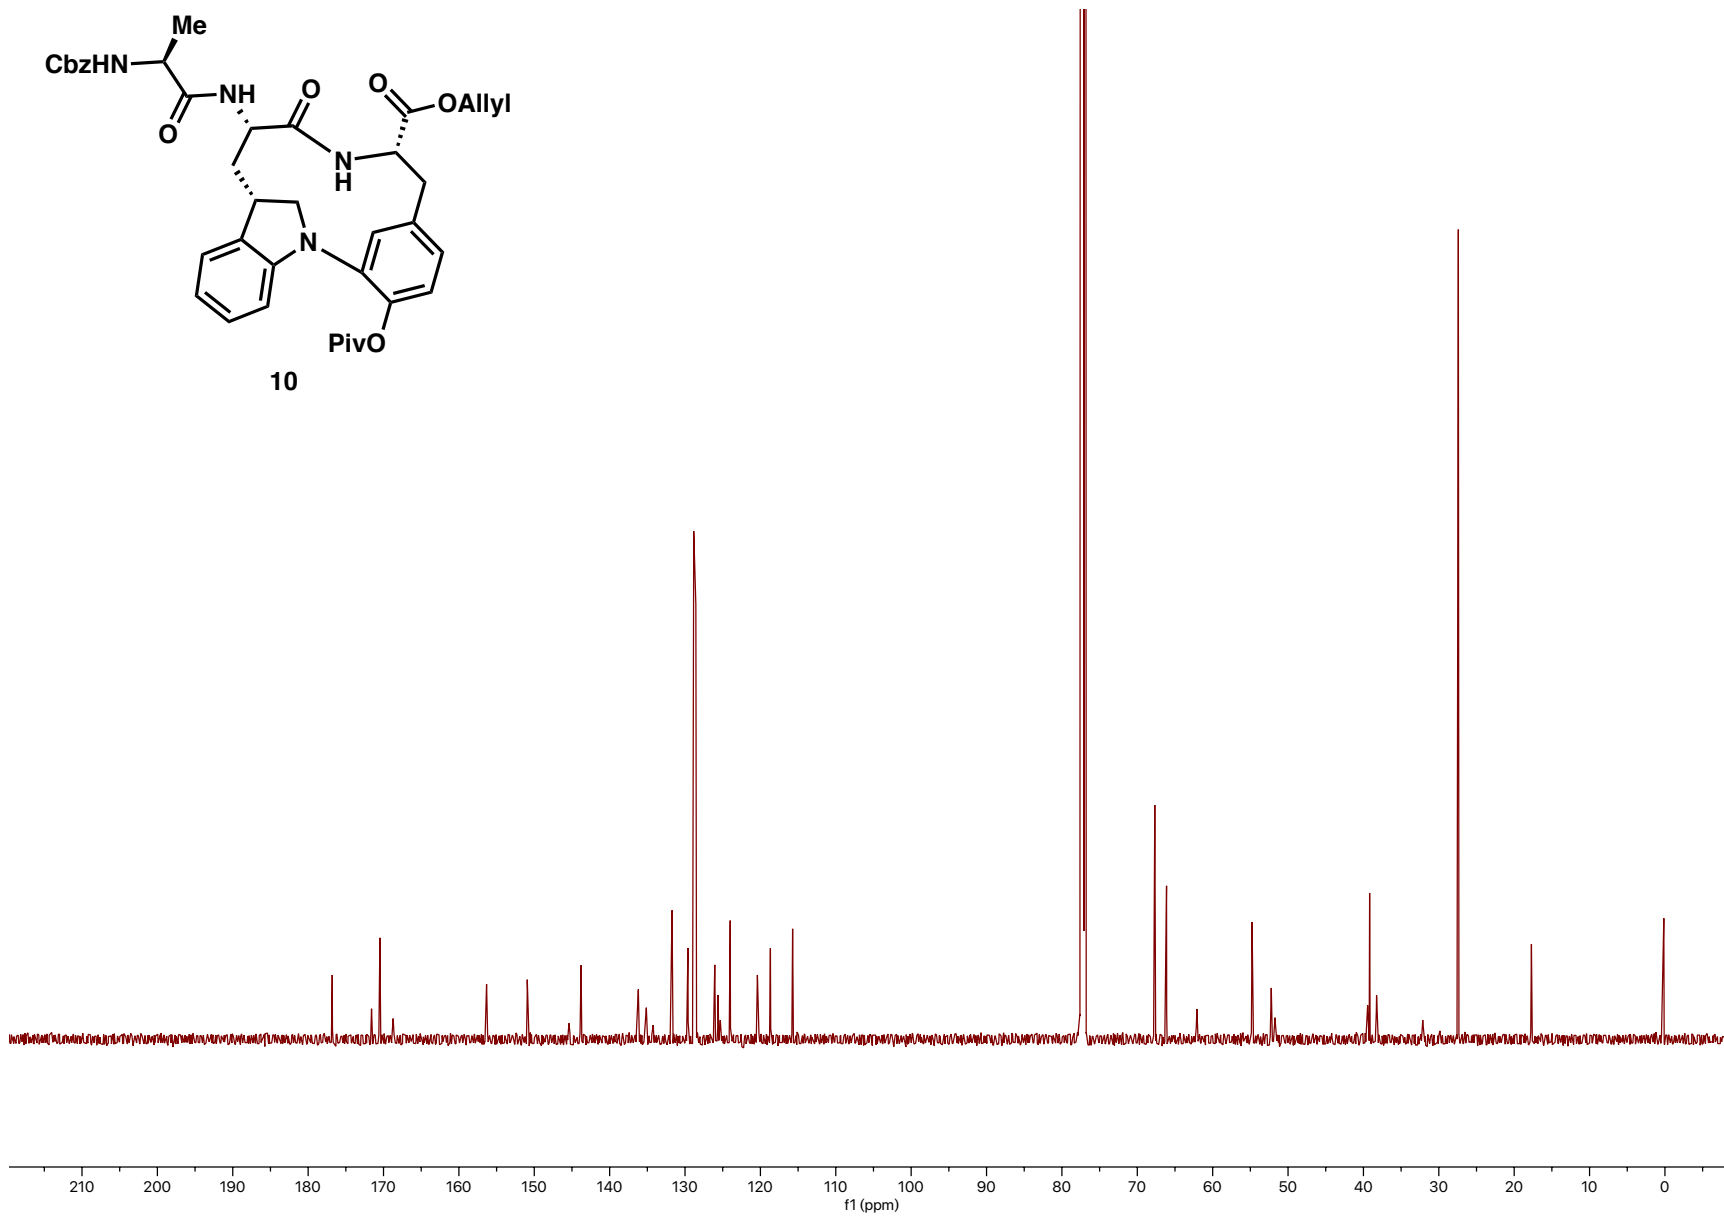

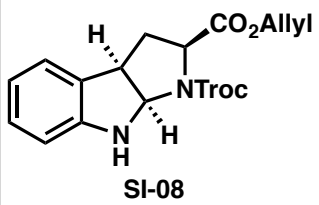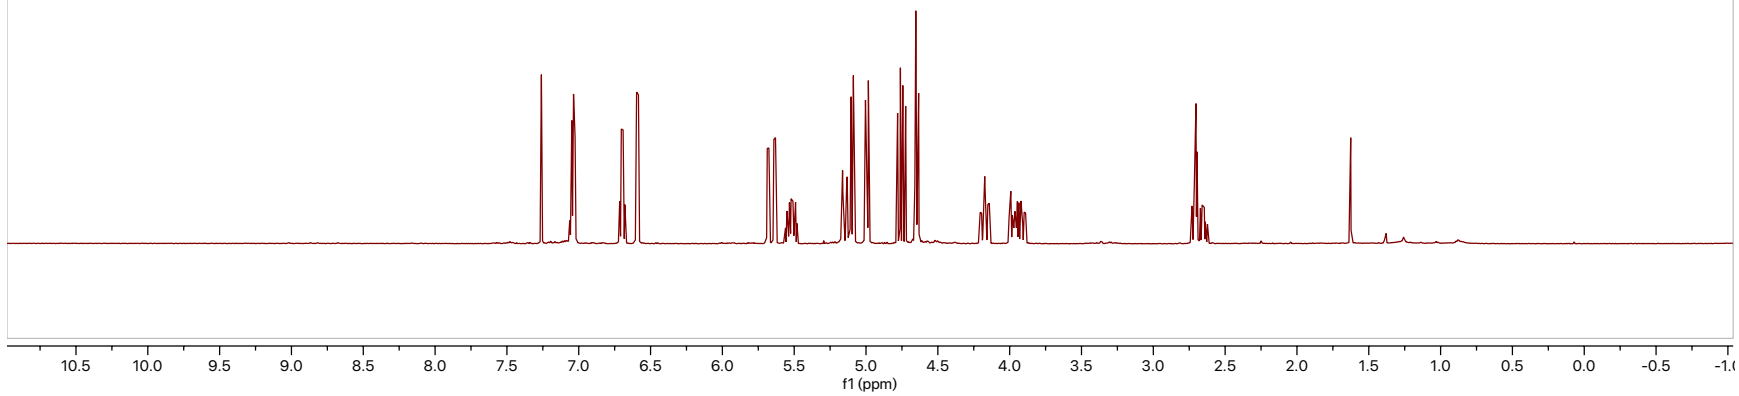

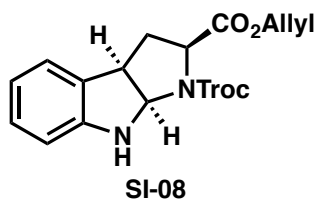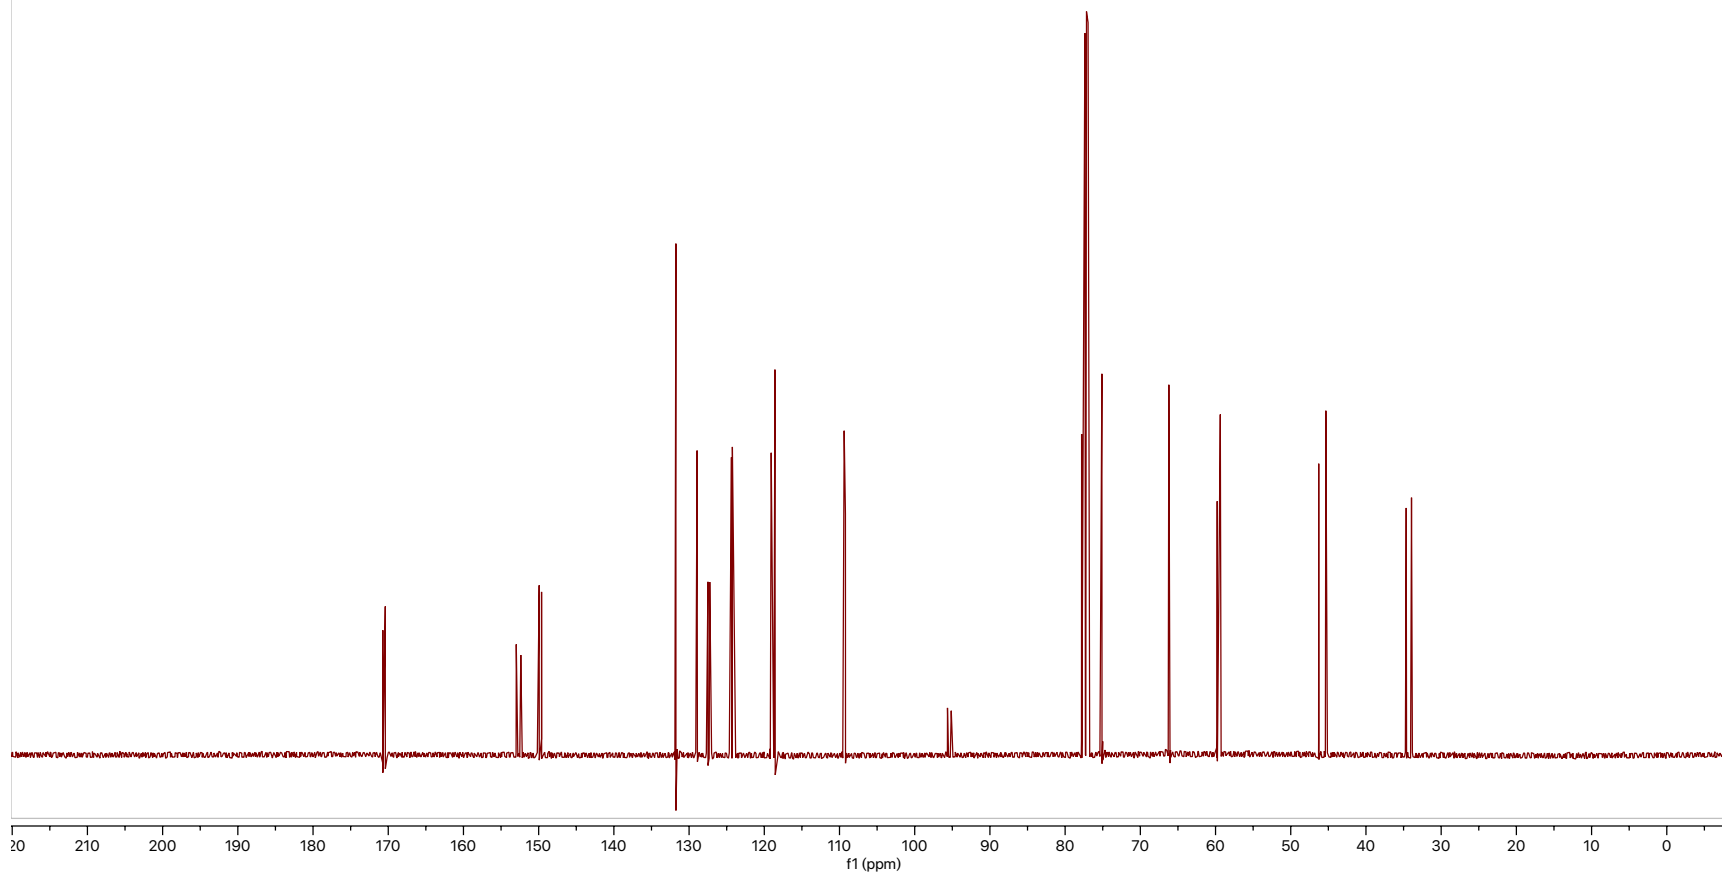



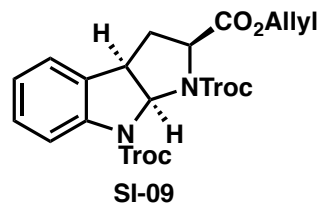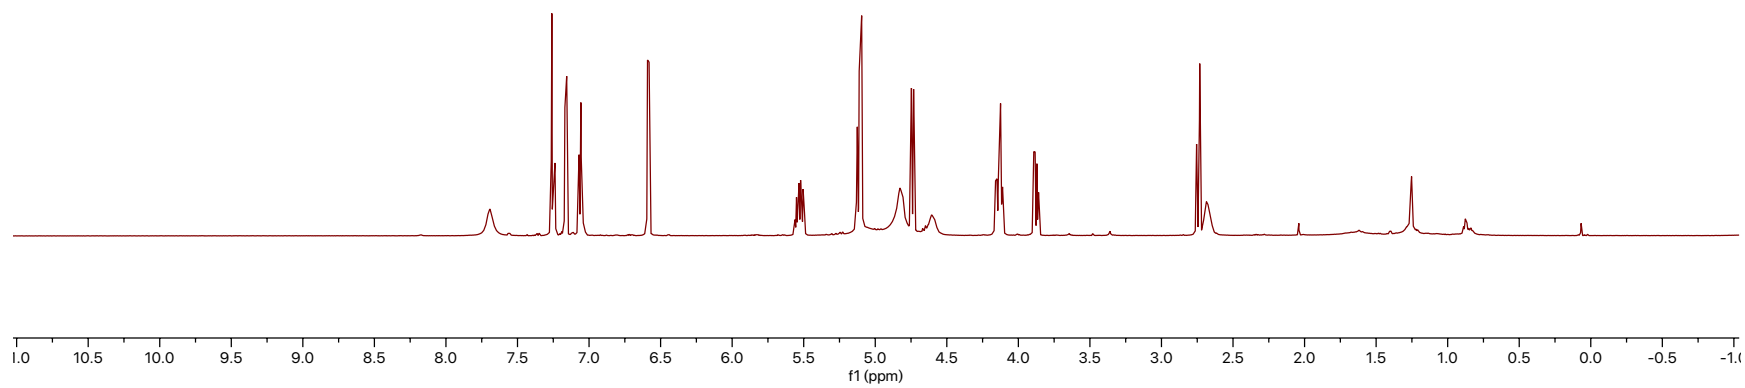

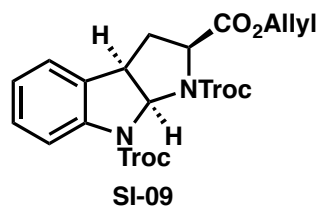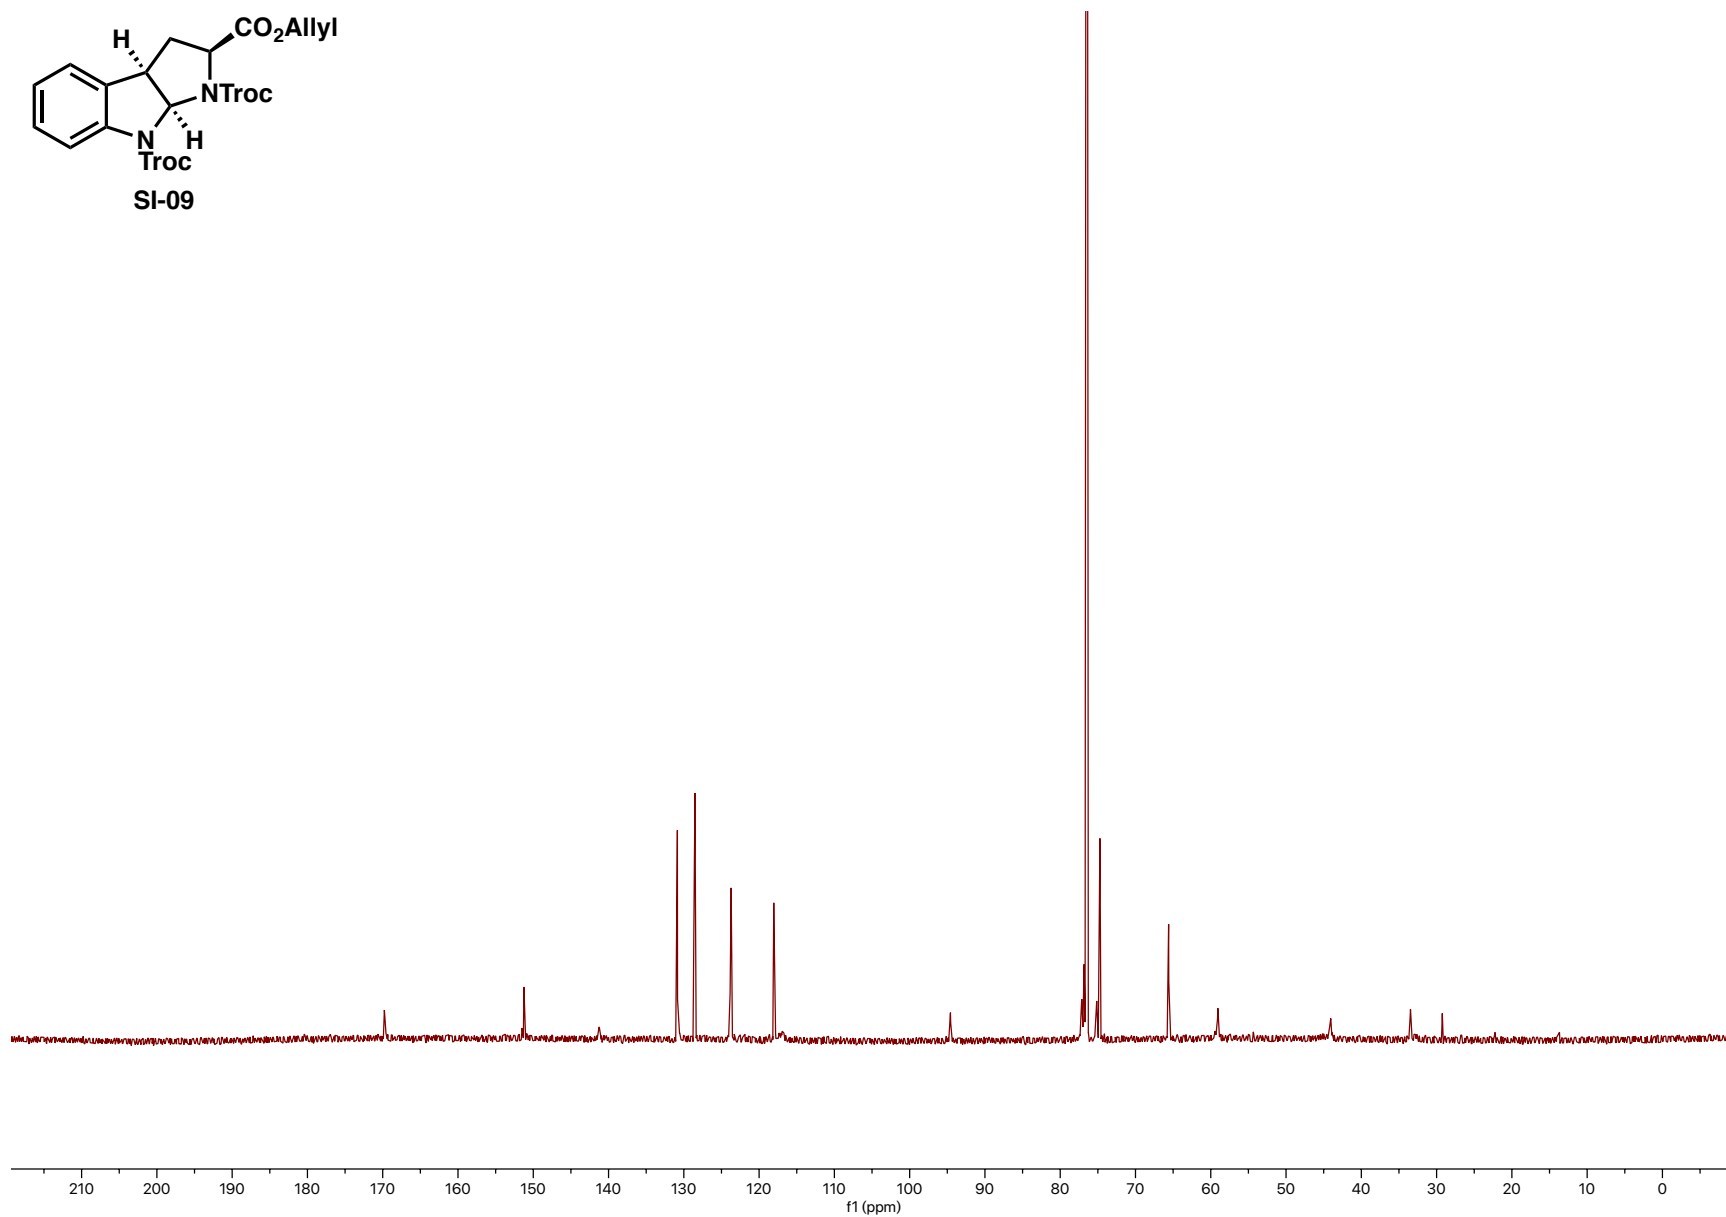

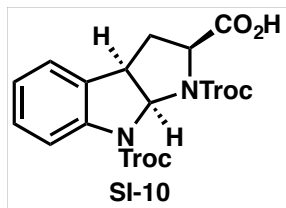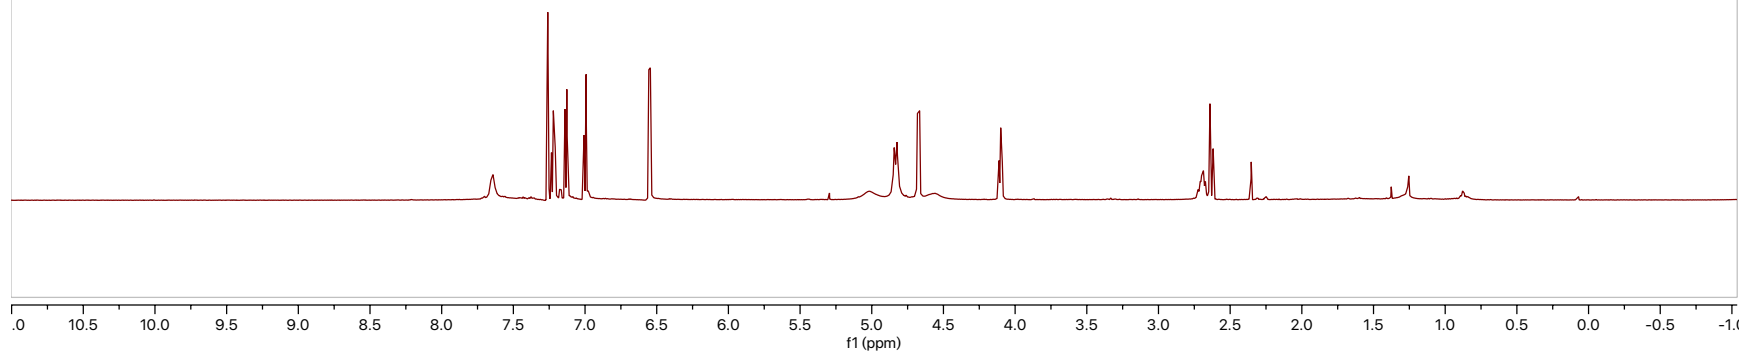

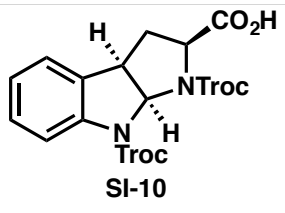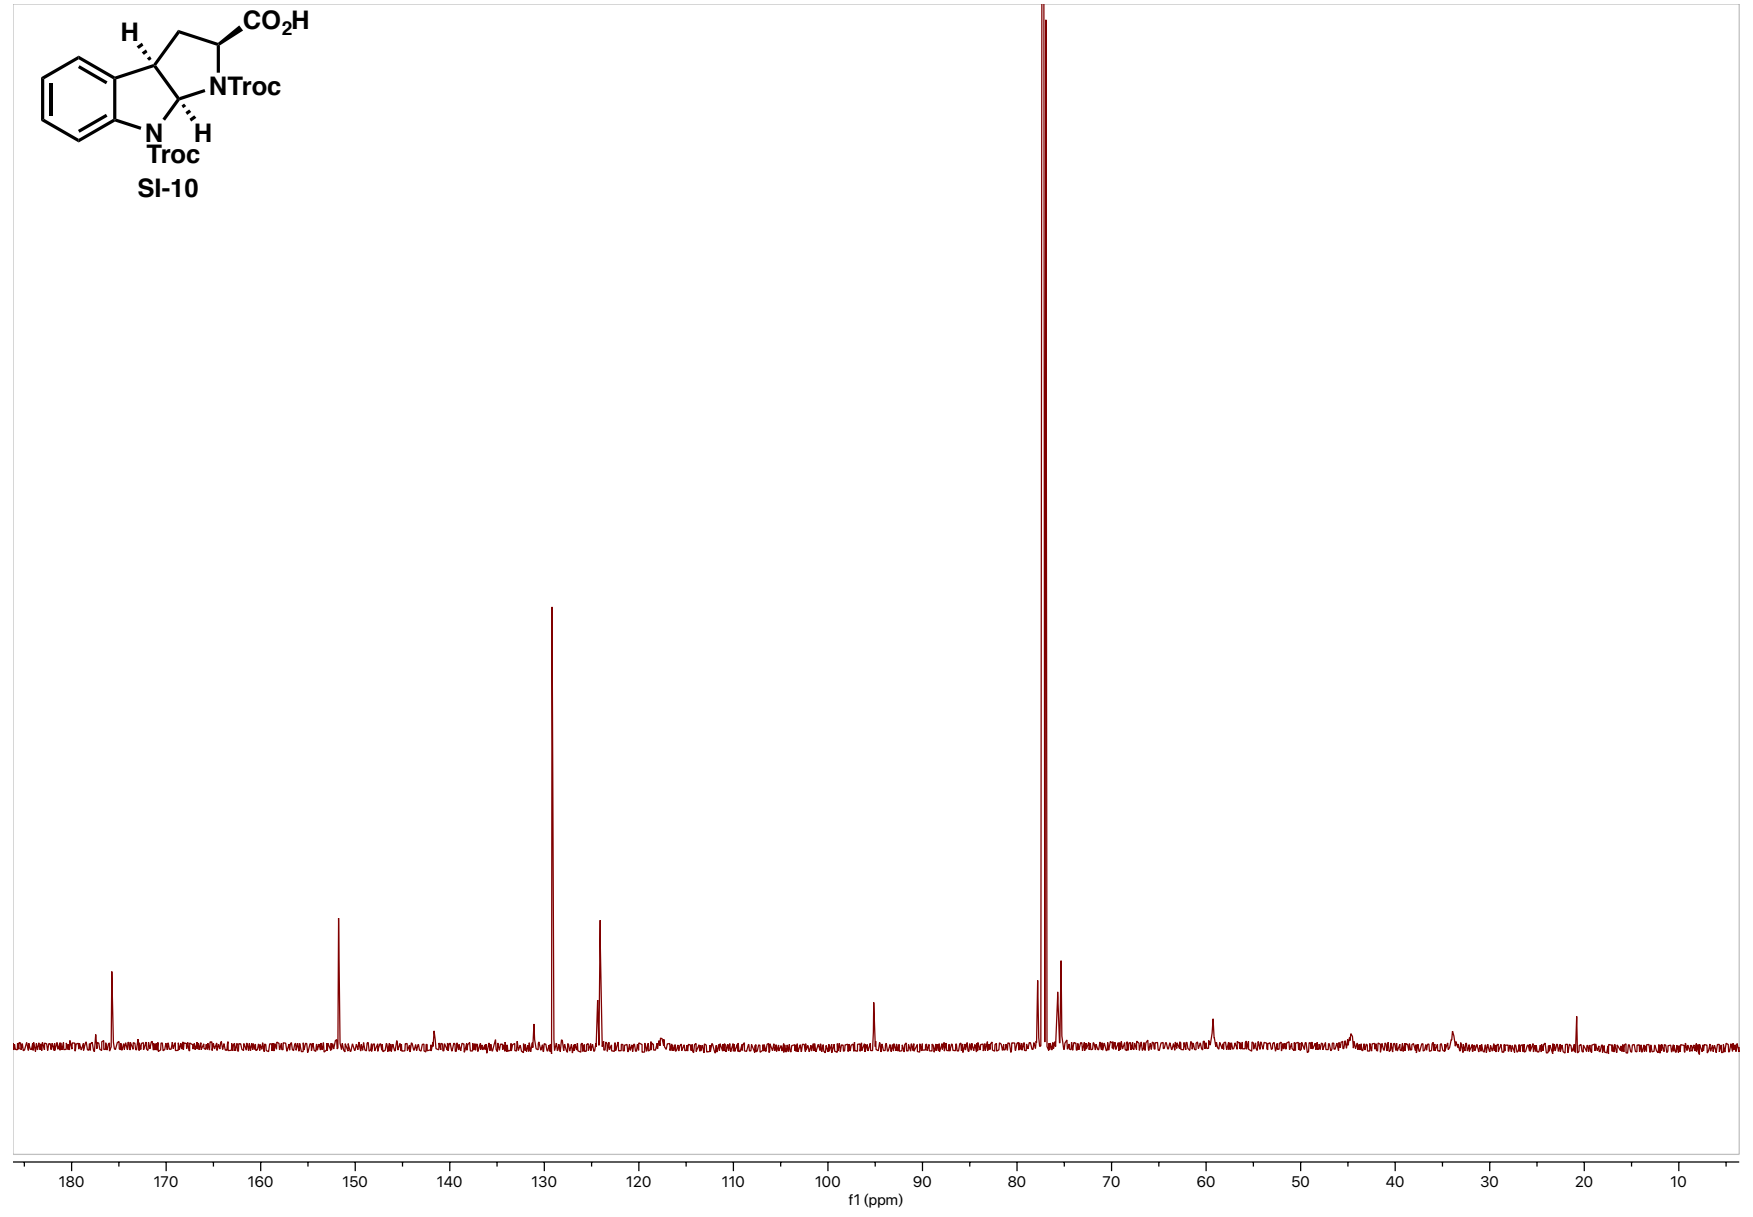

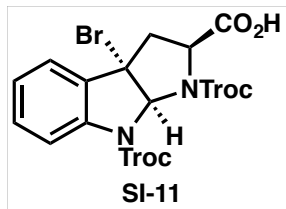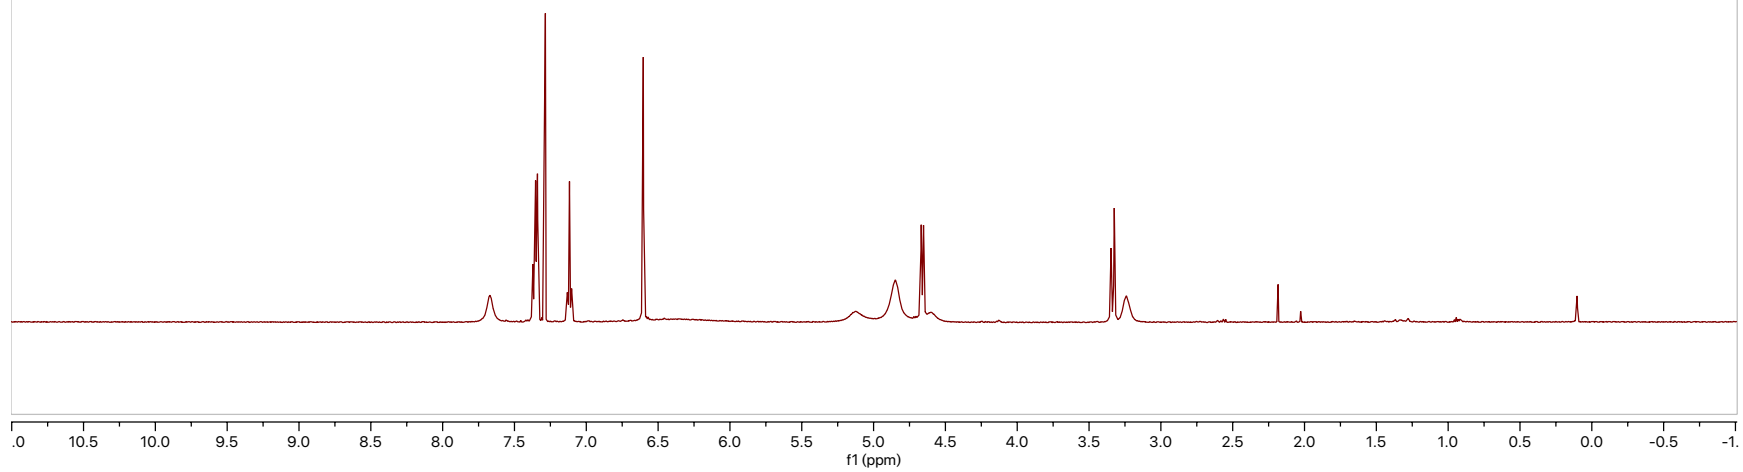

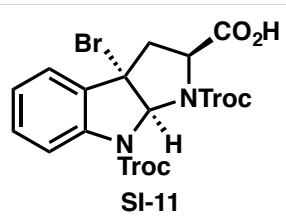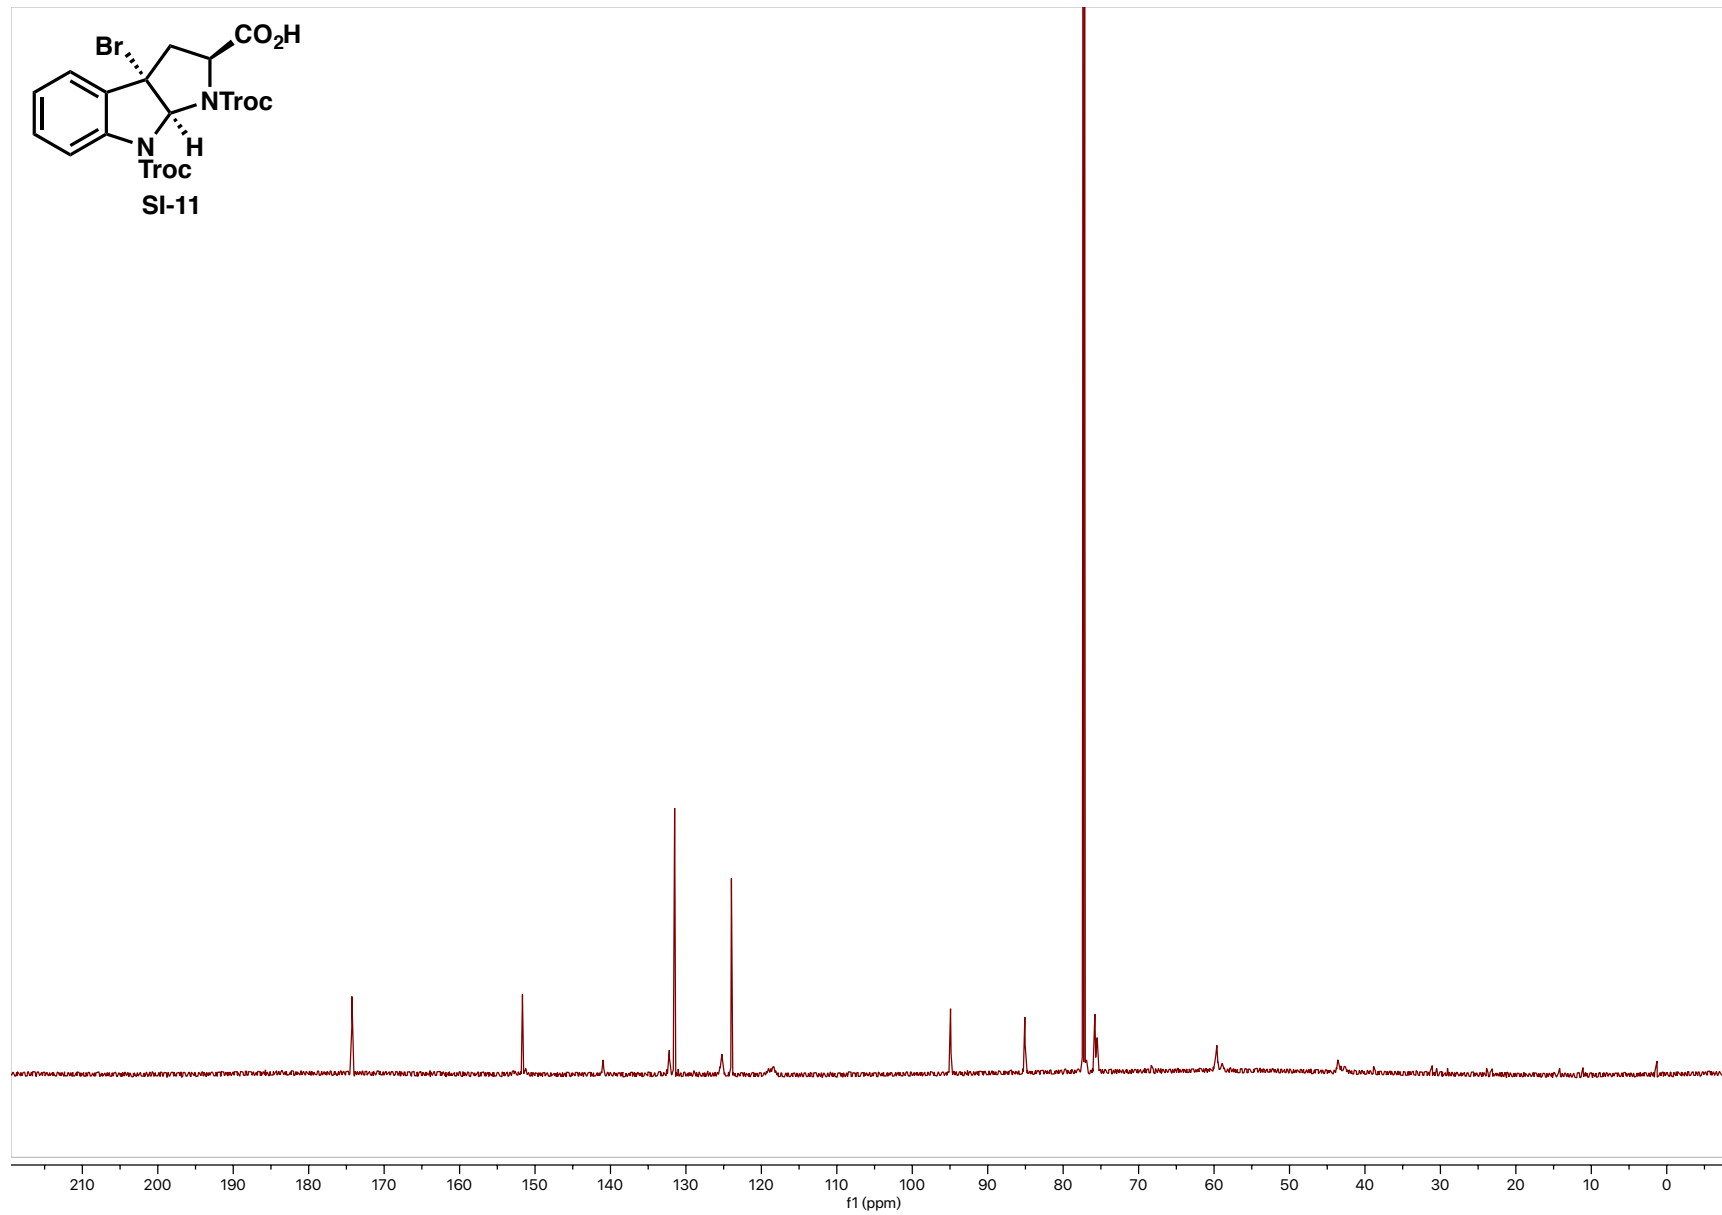

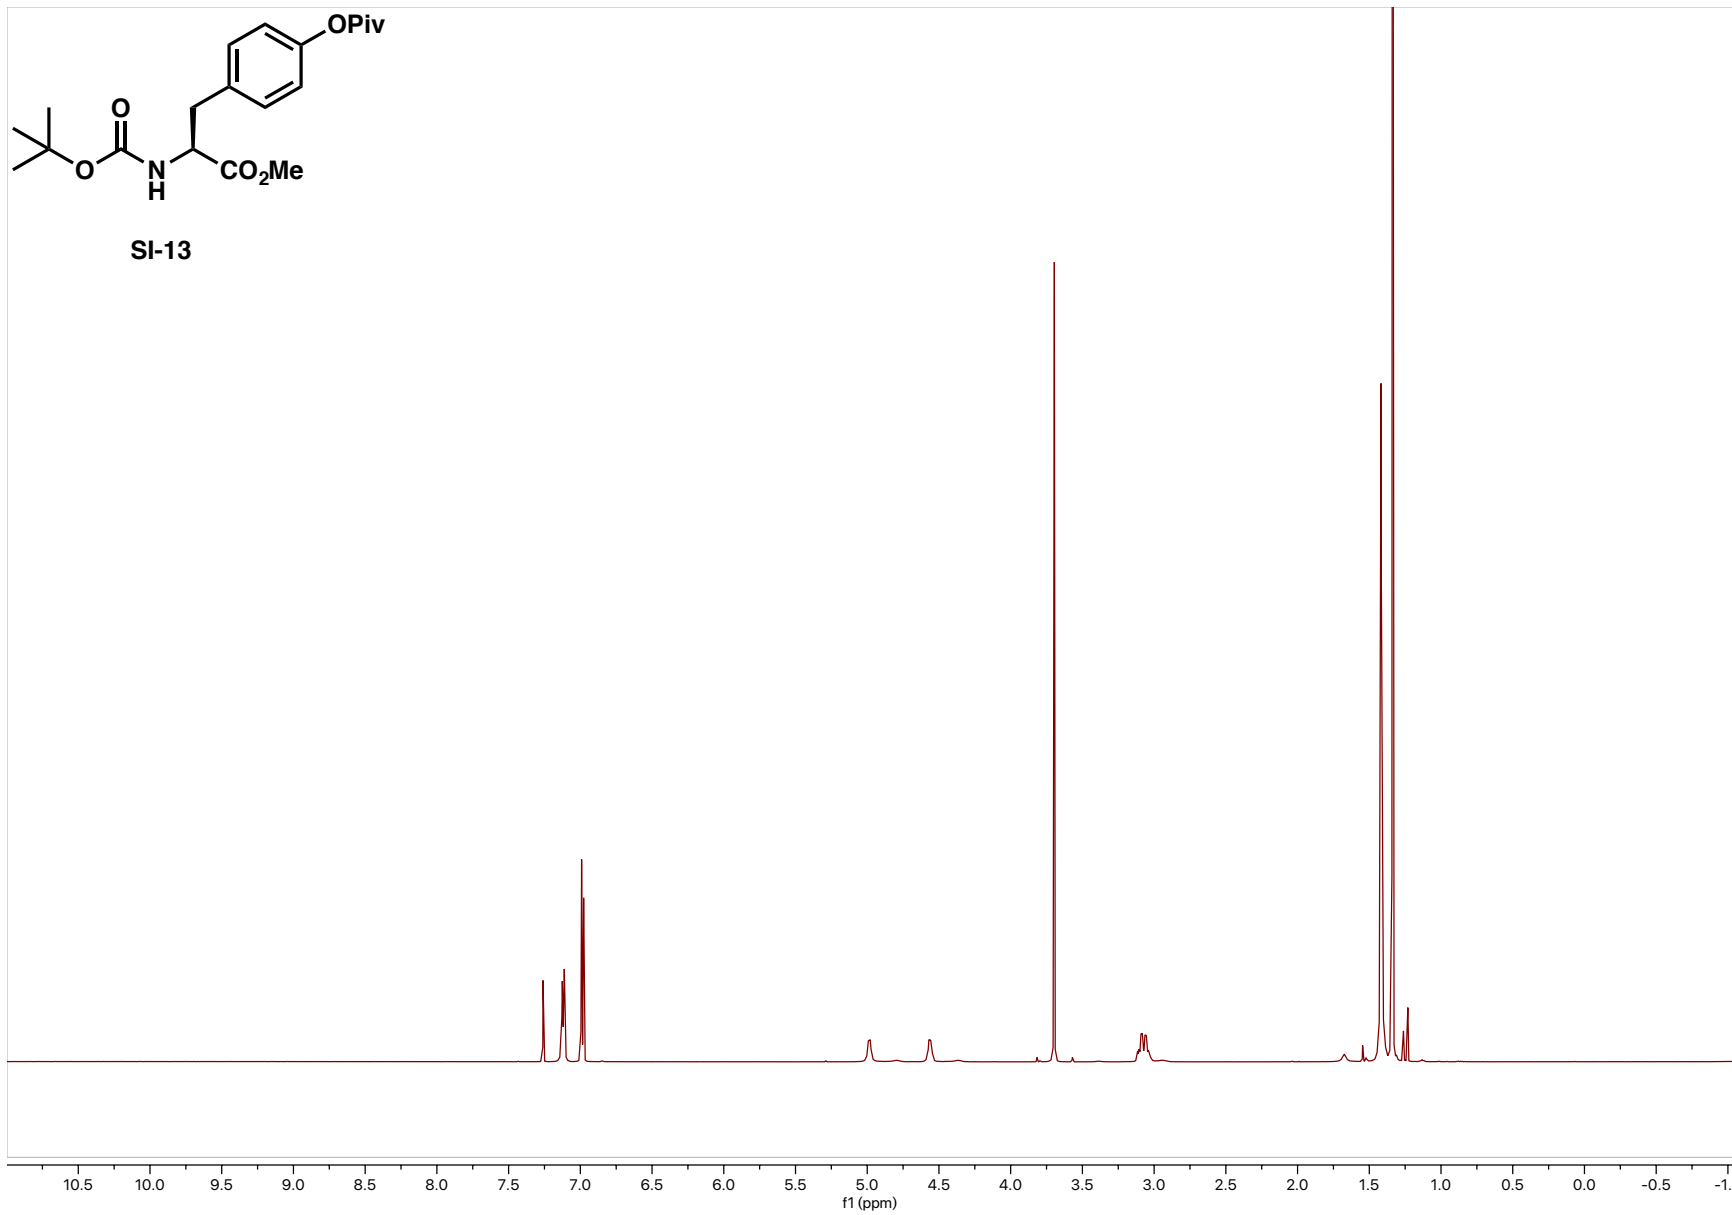

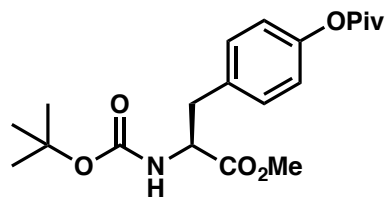

SI-13

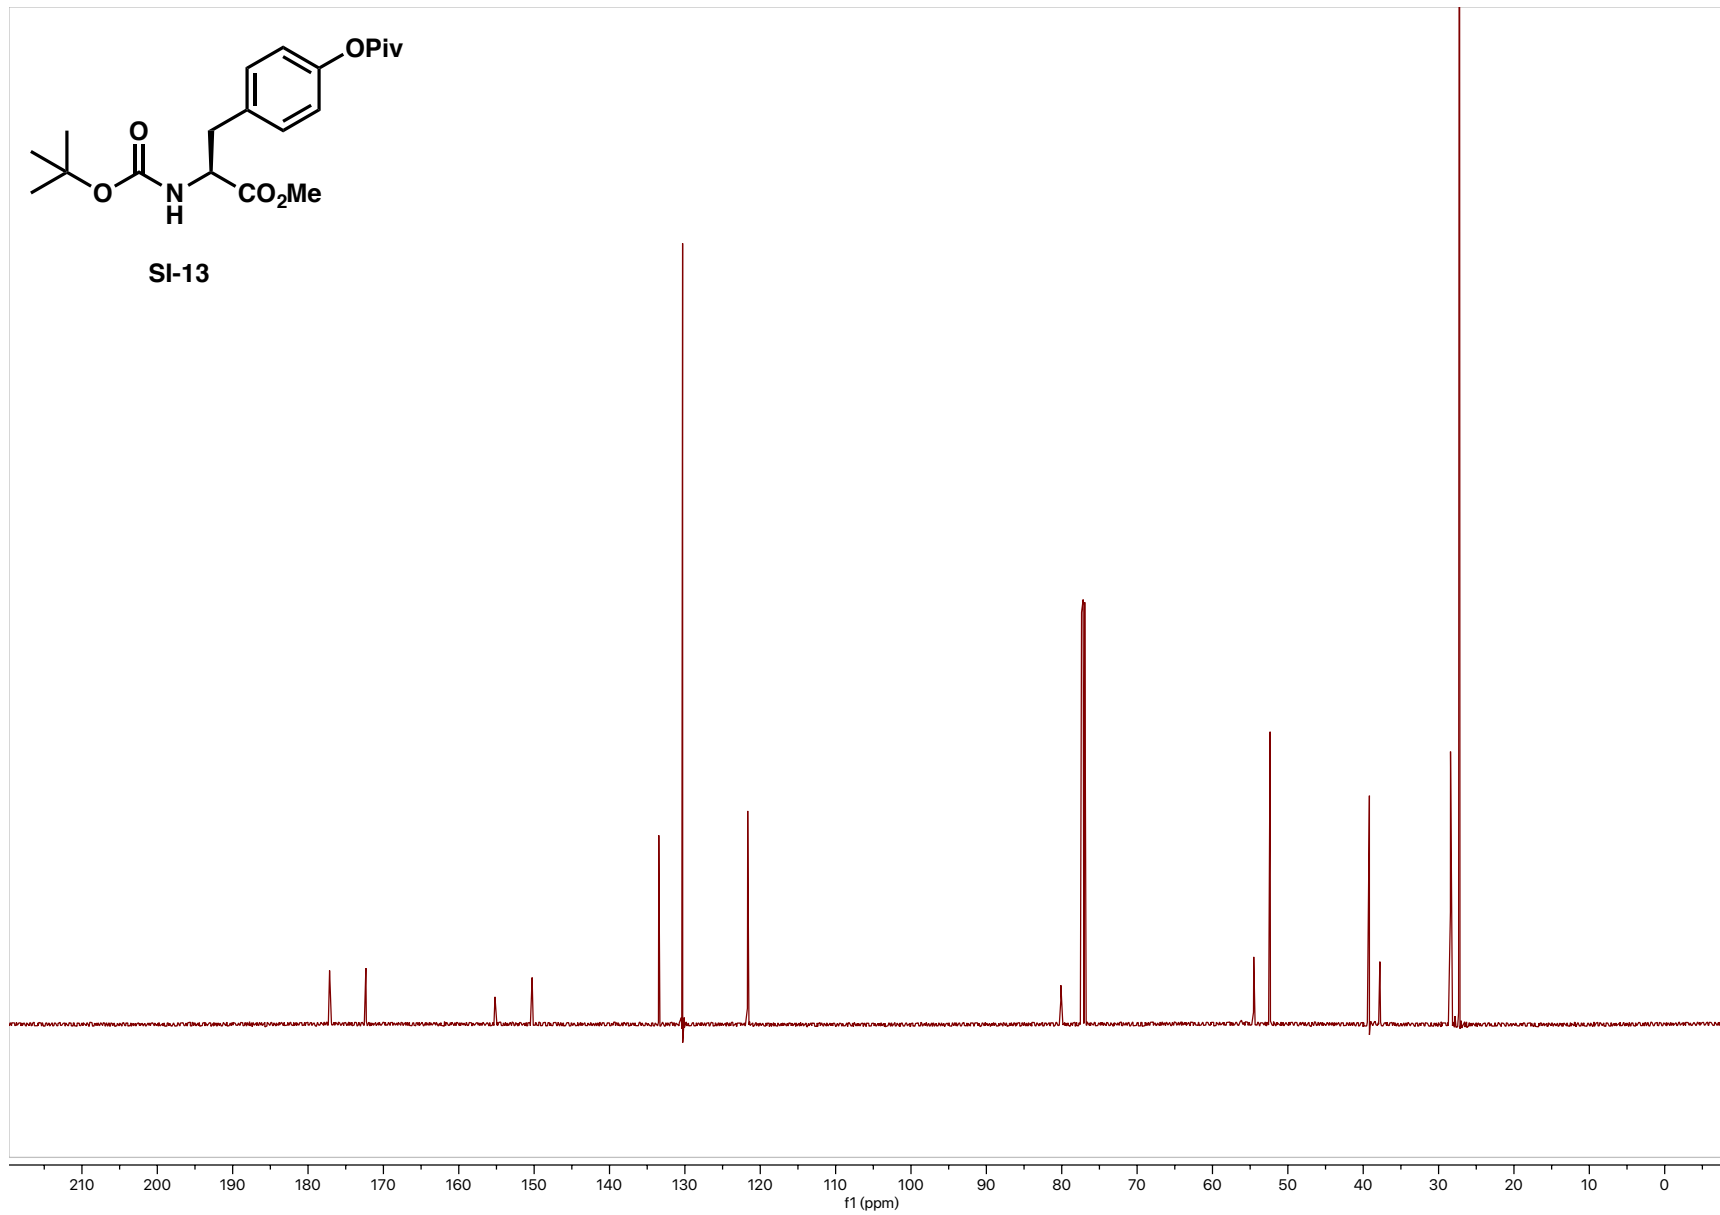



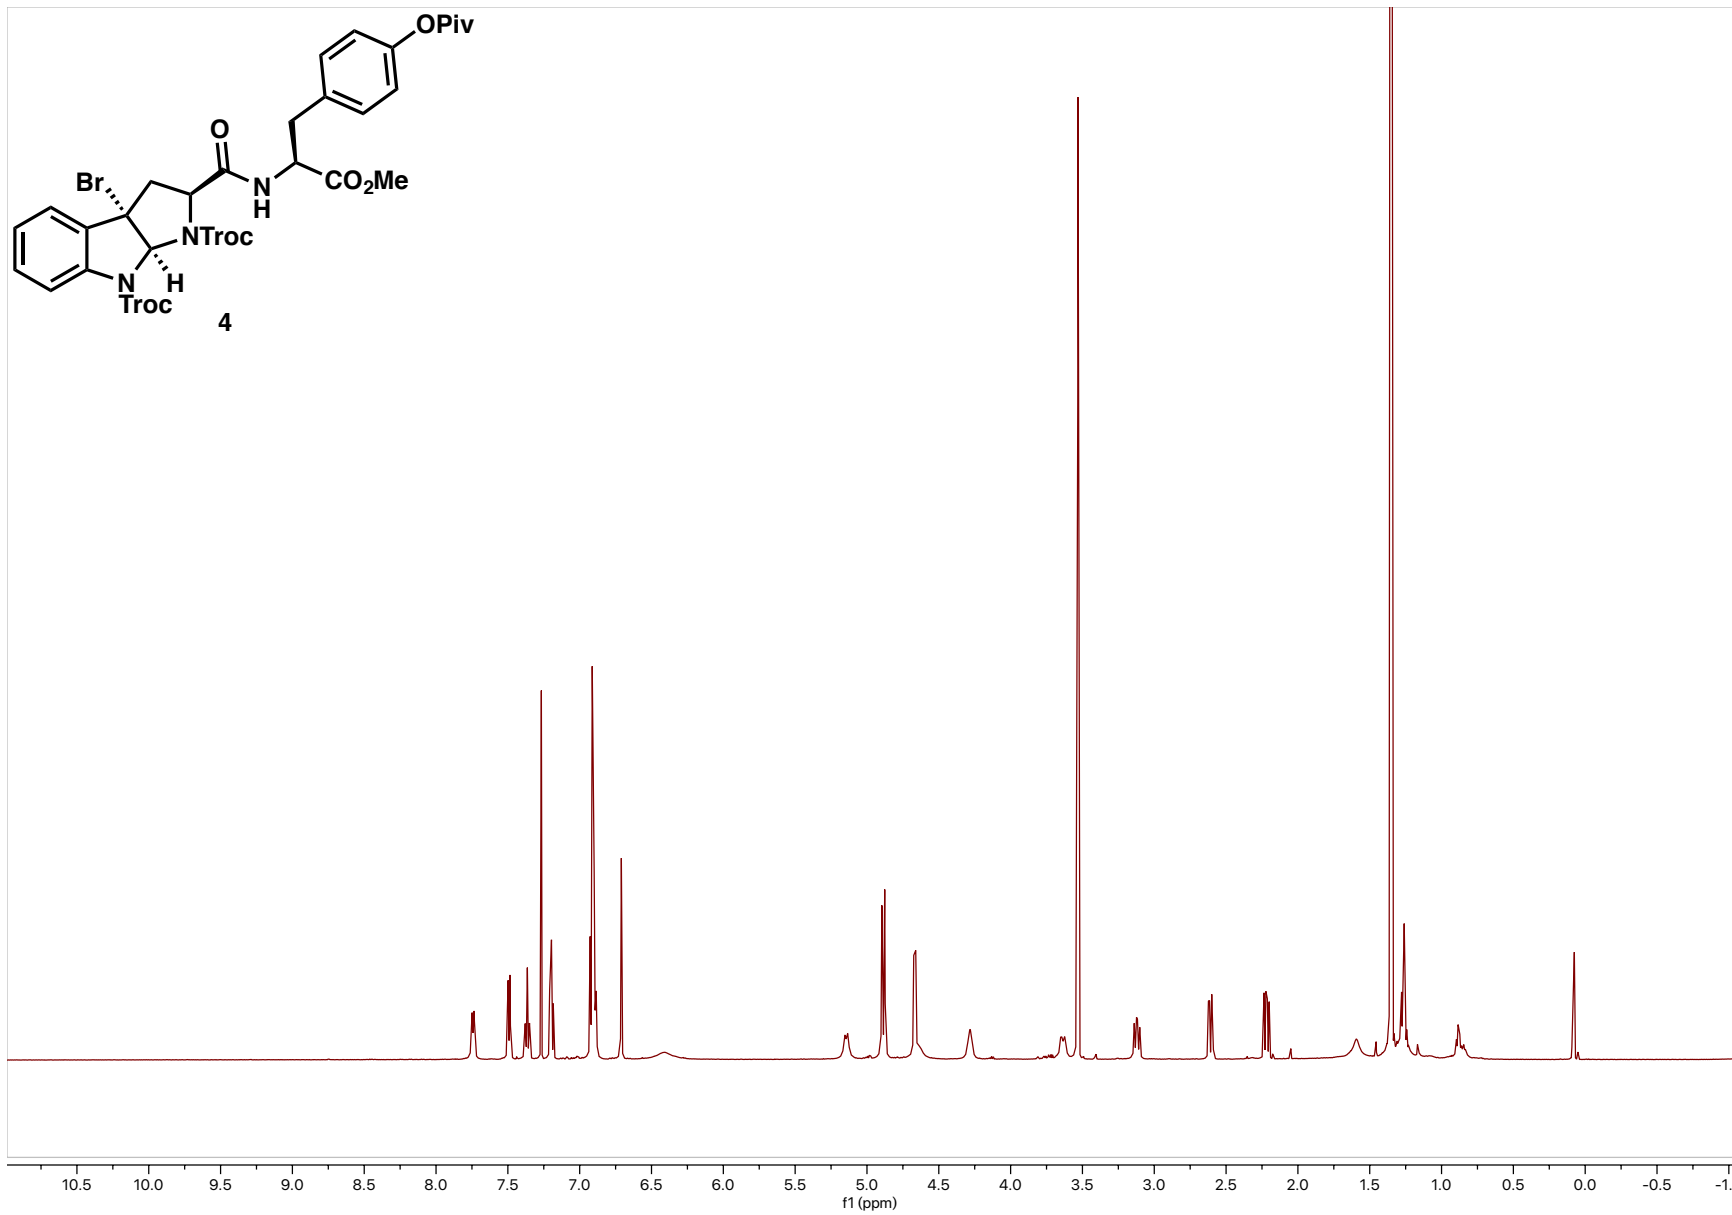

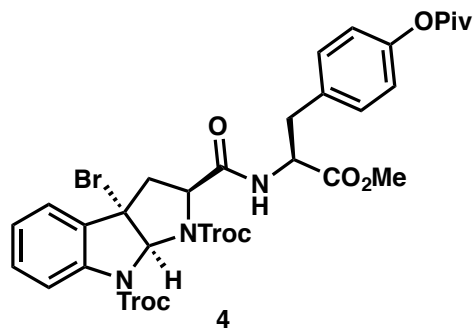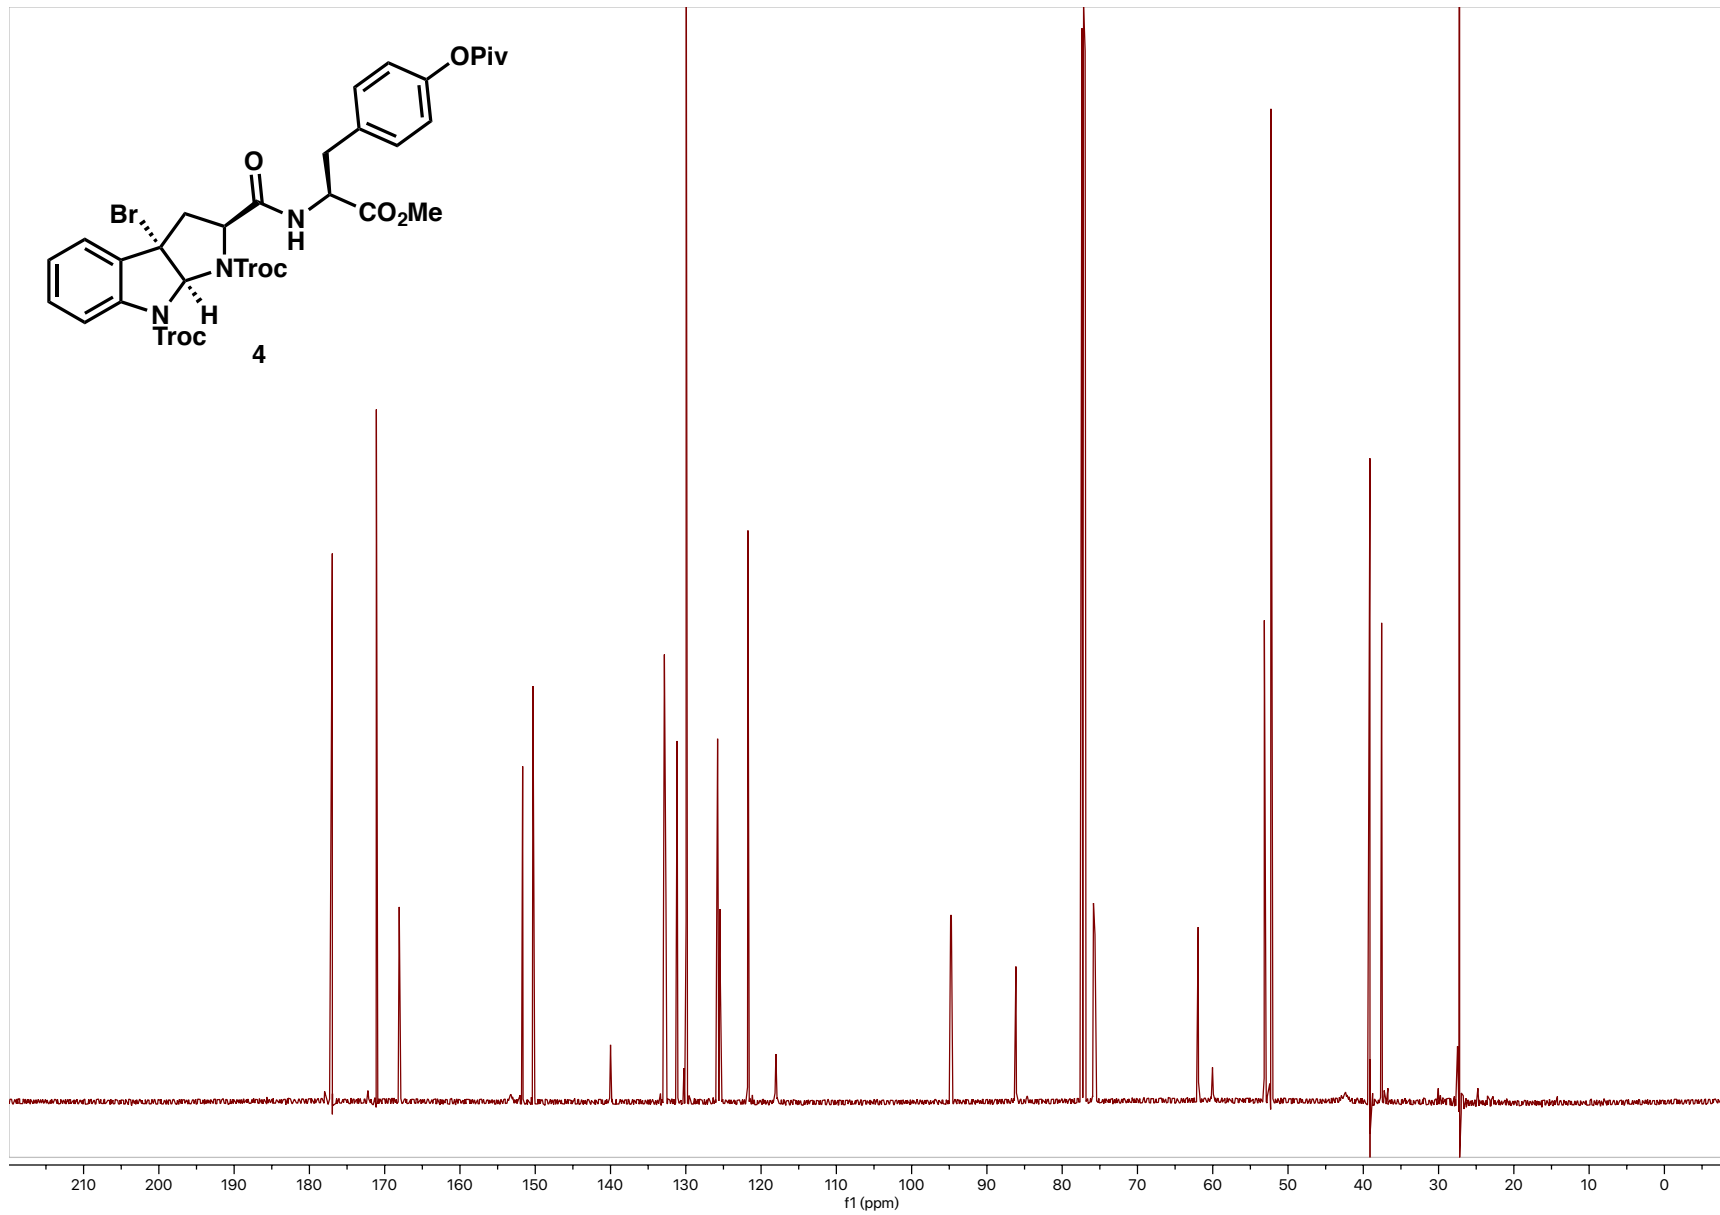

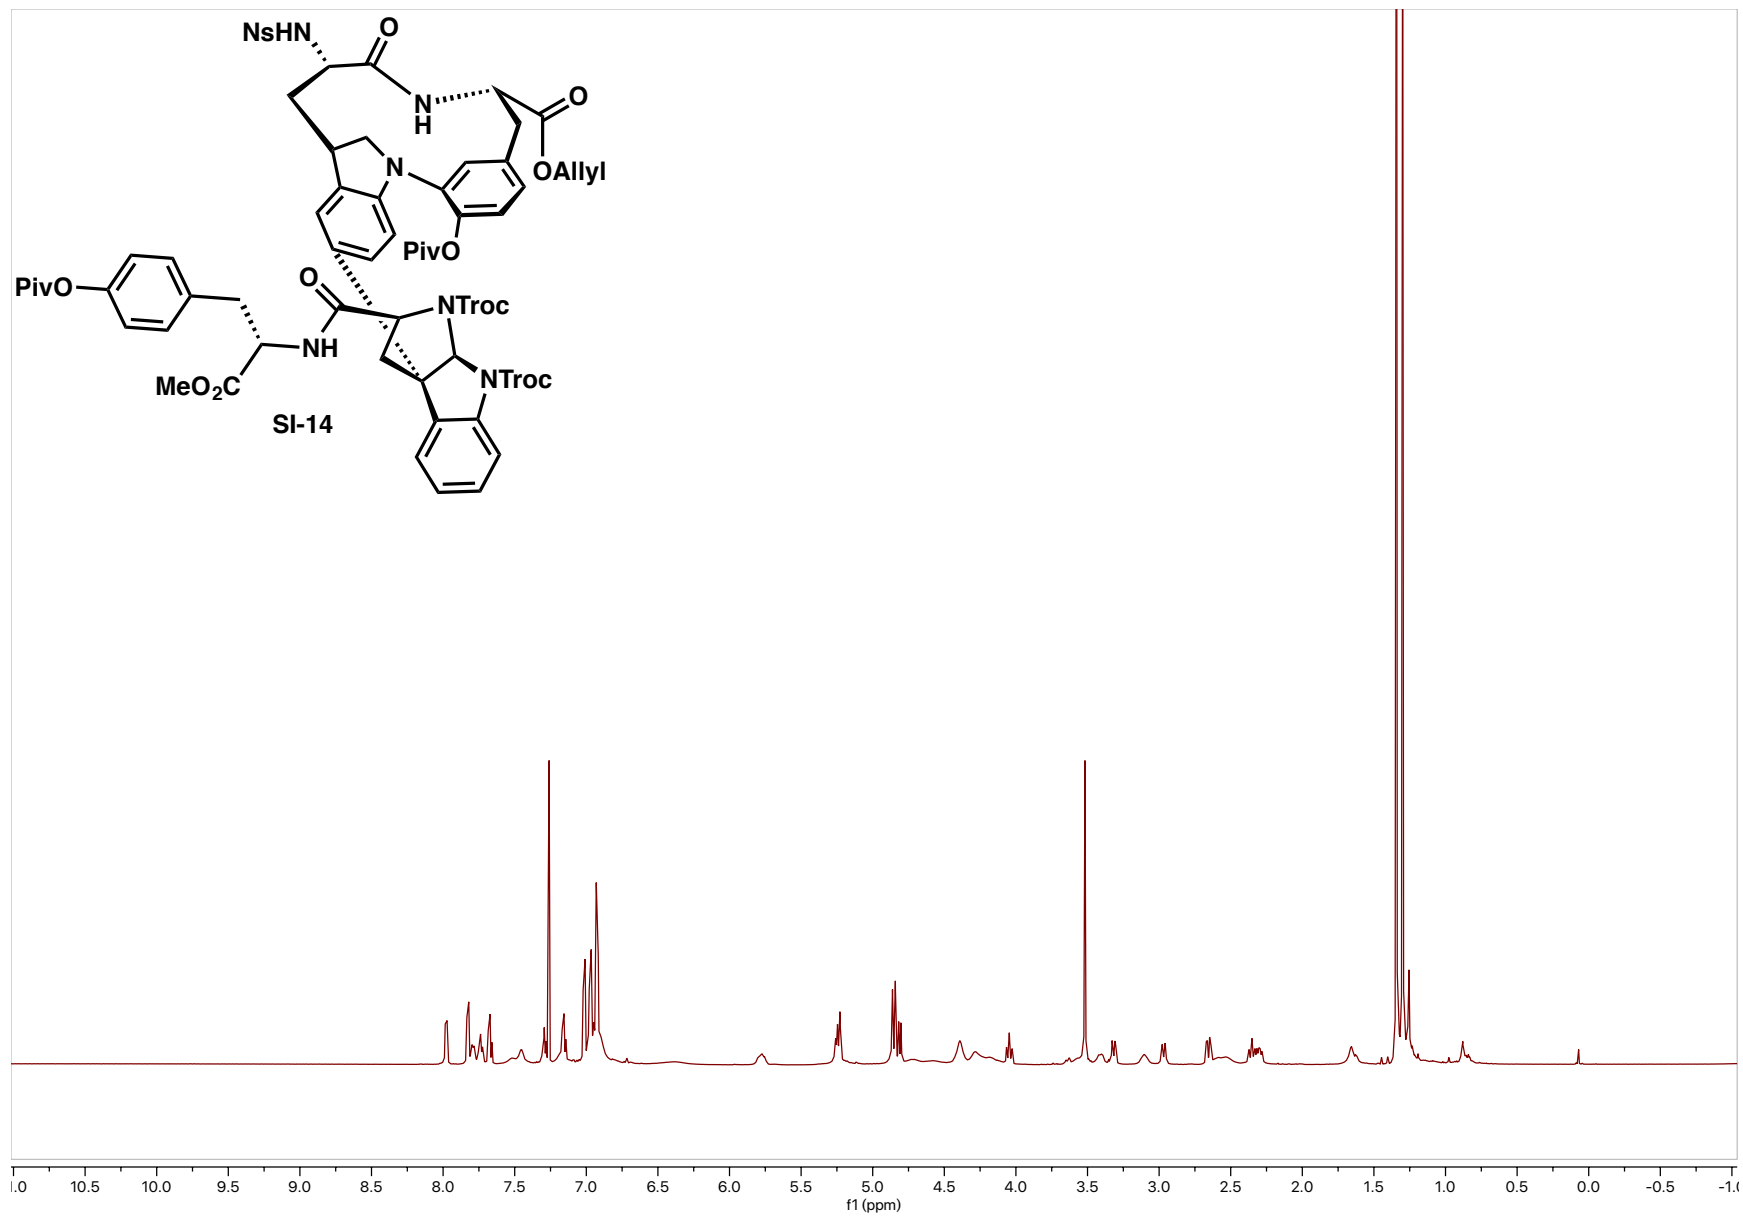

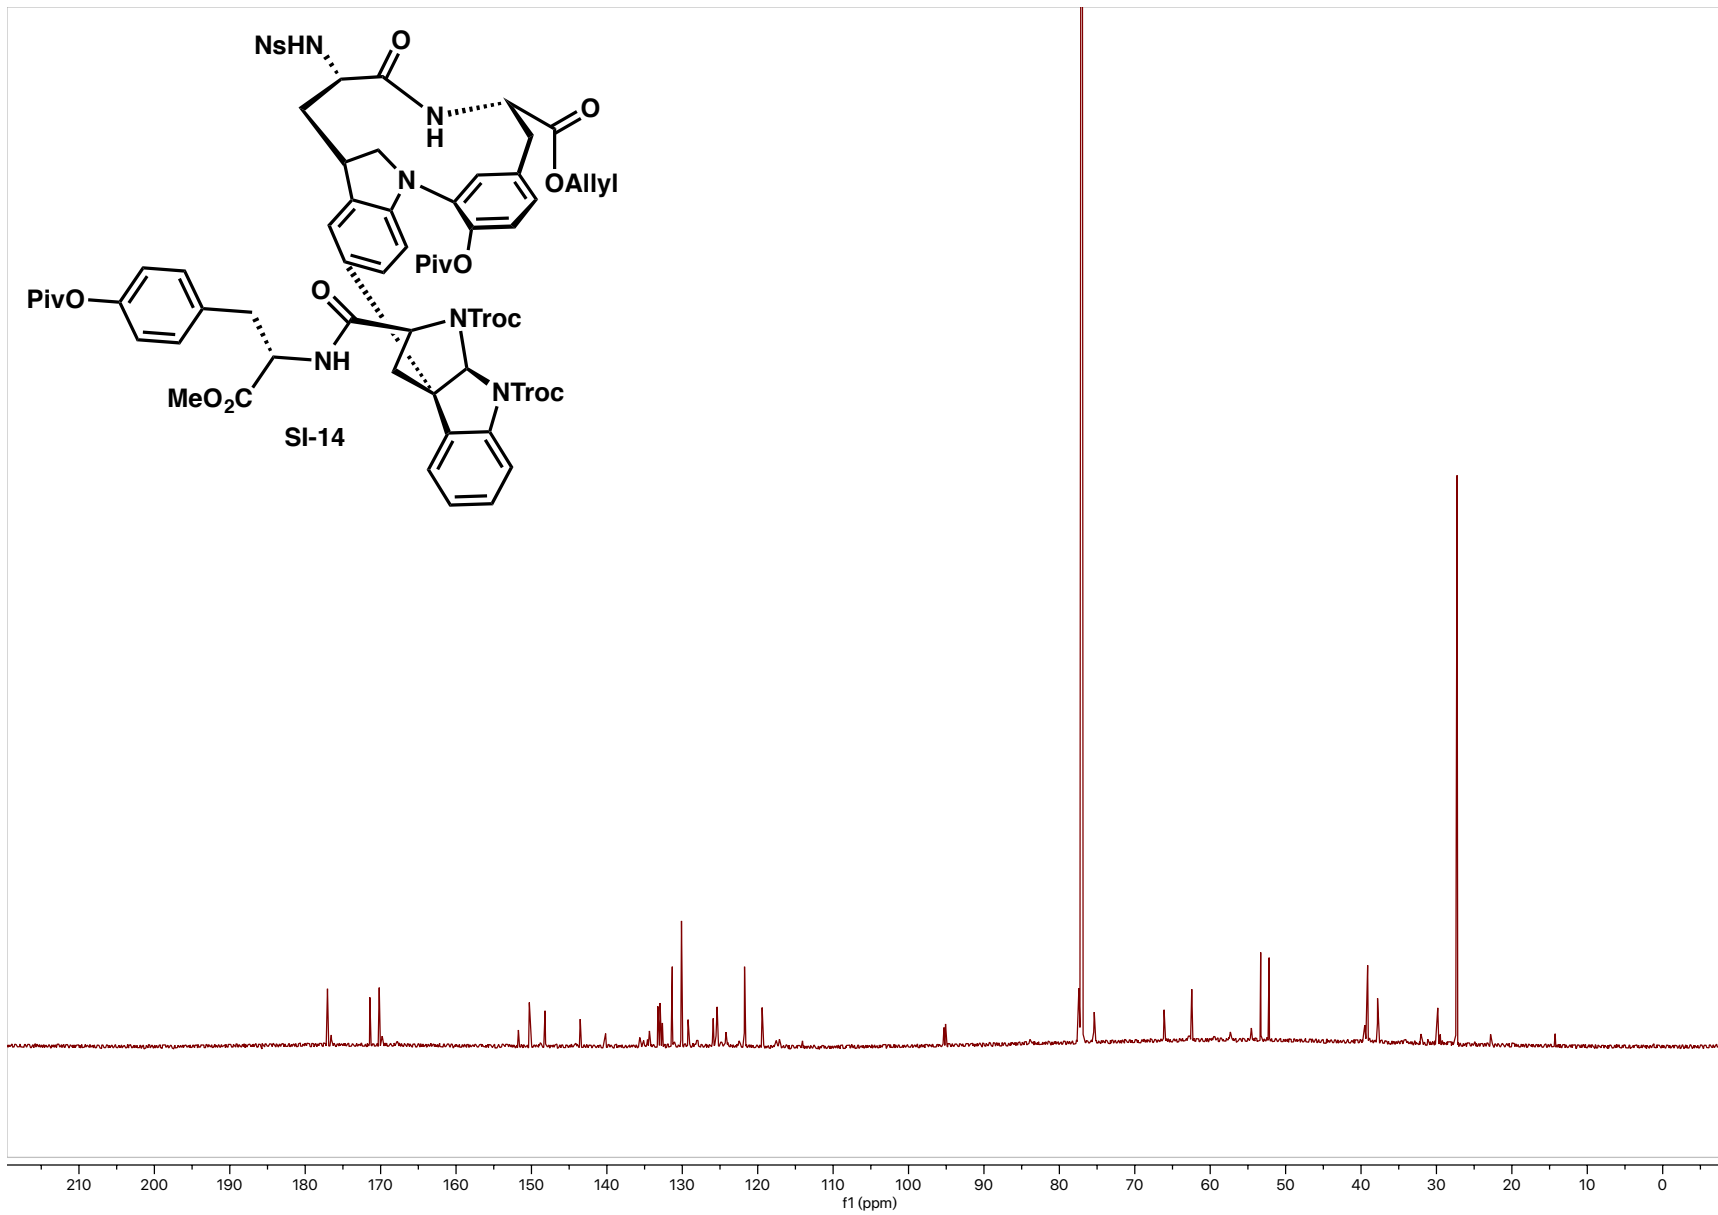

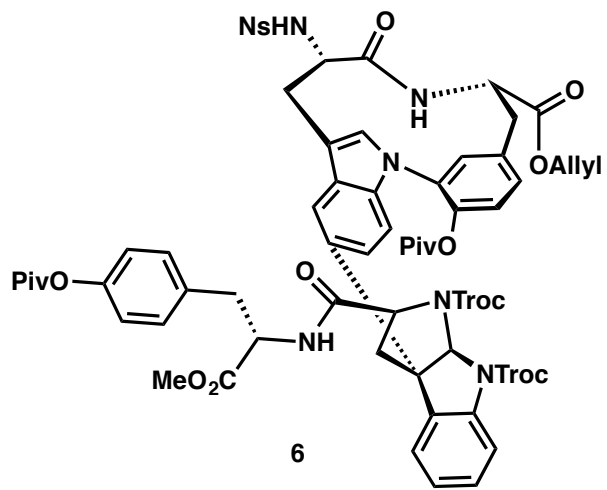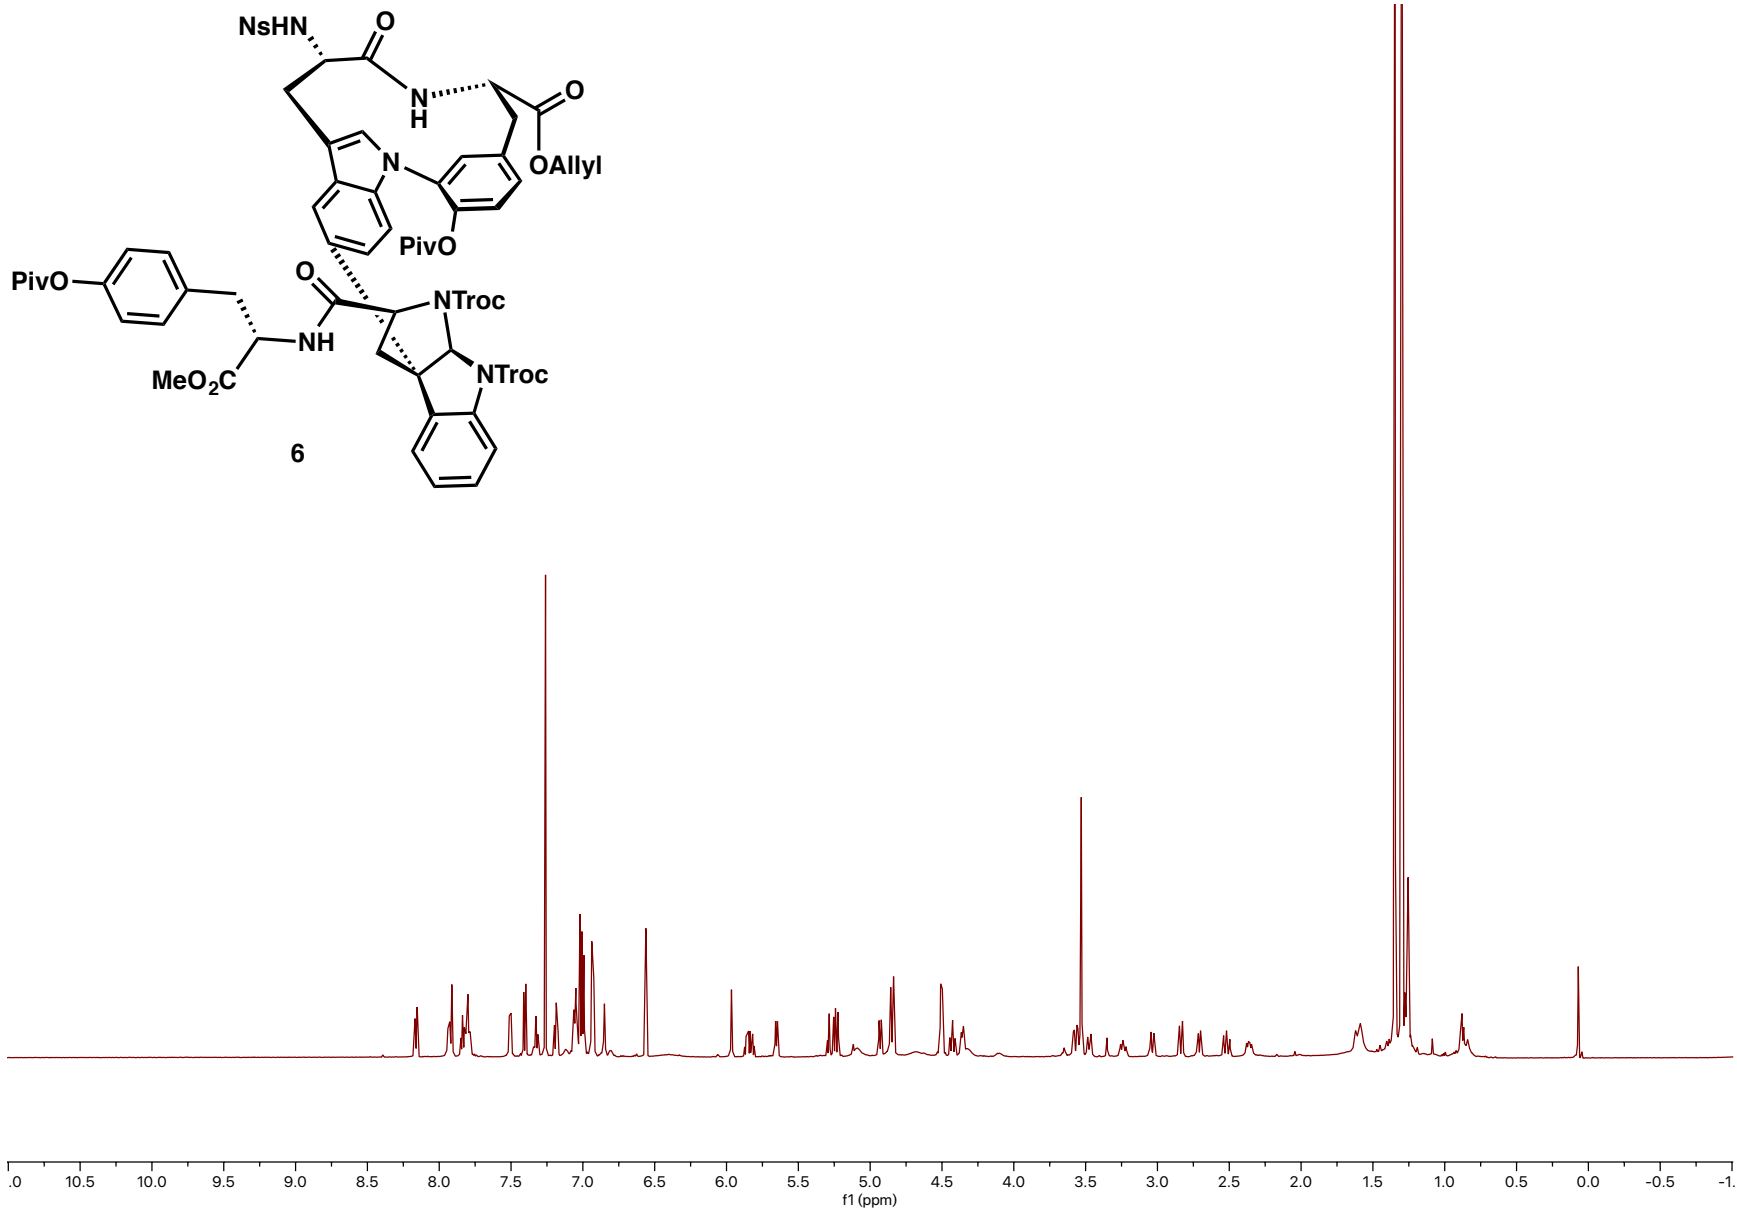

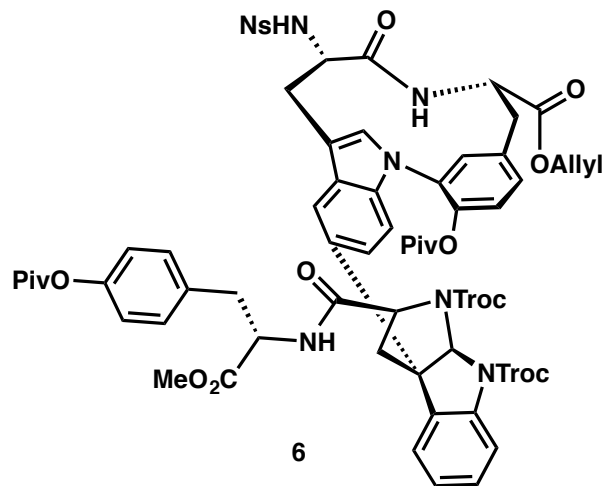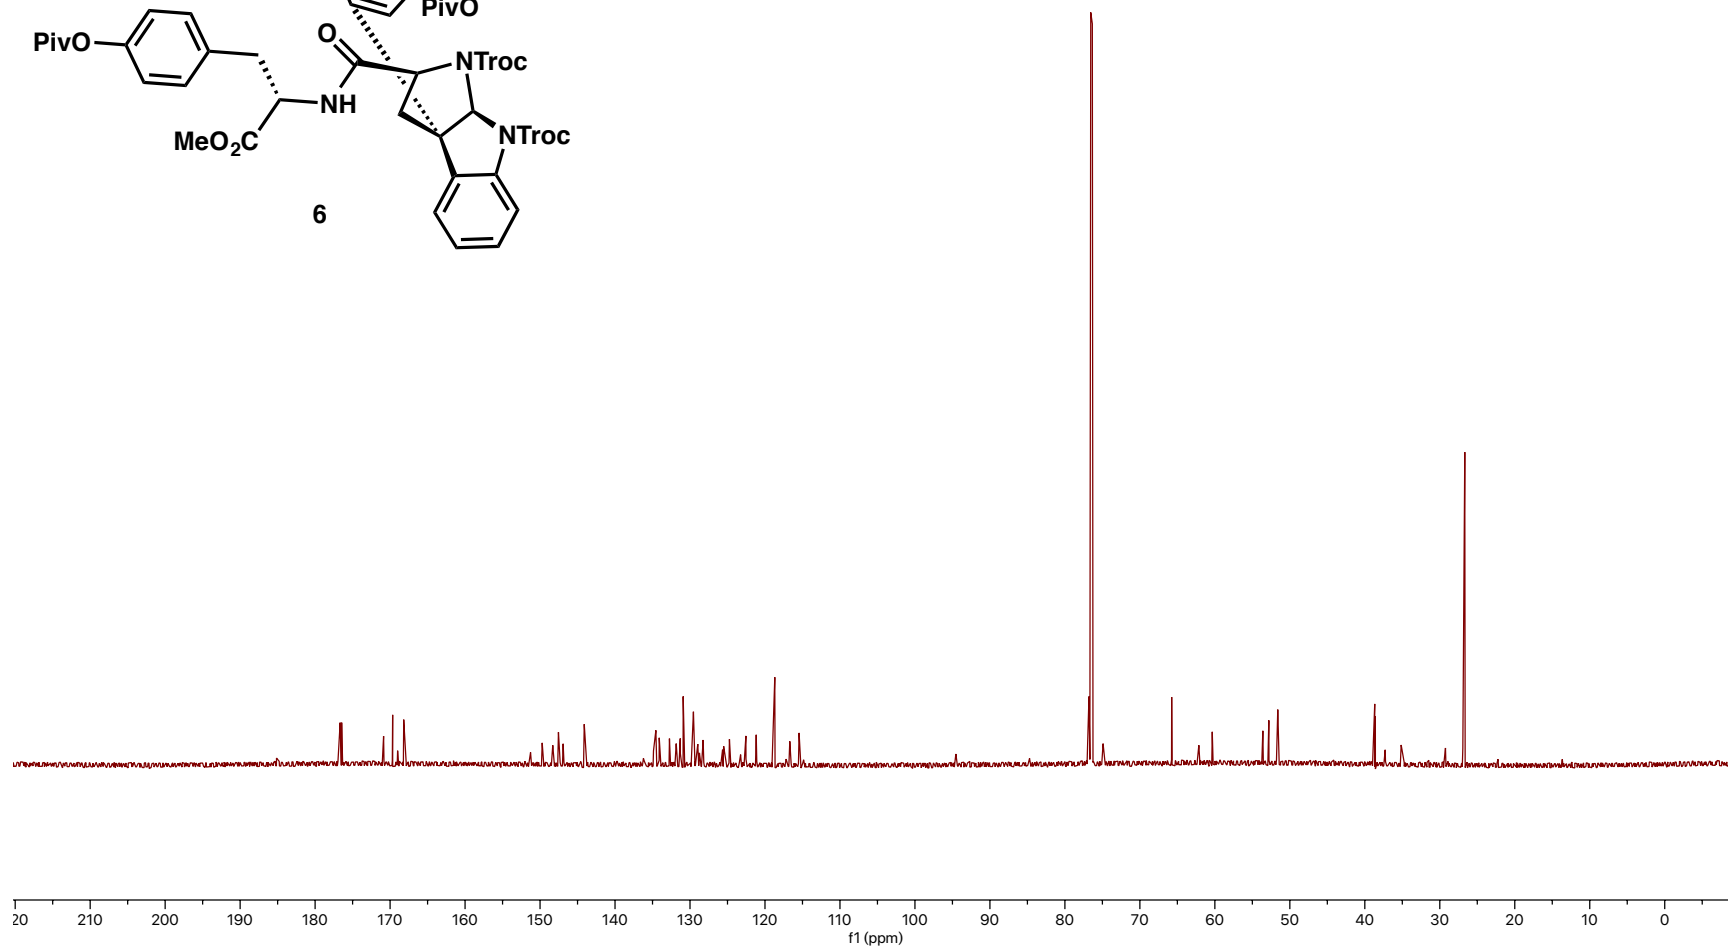

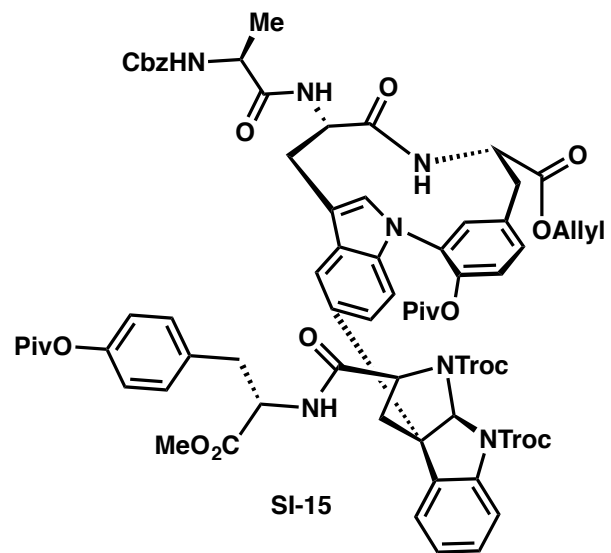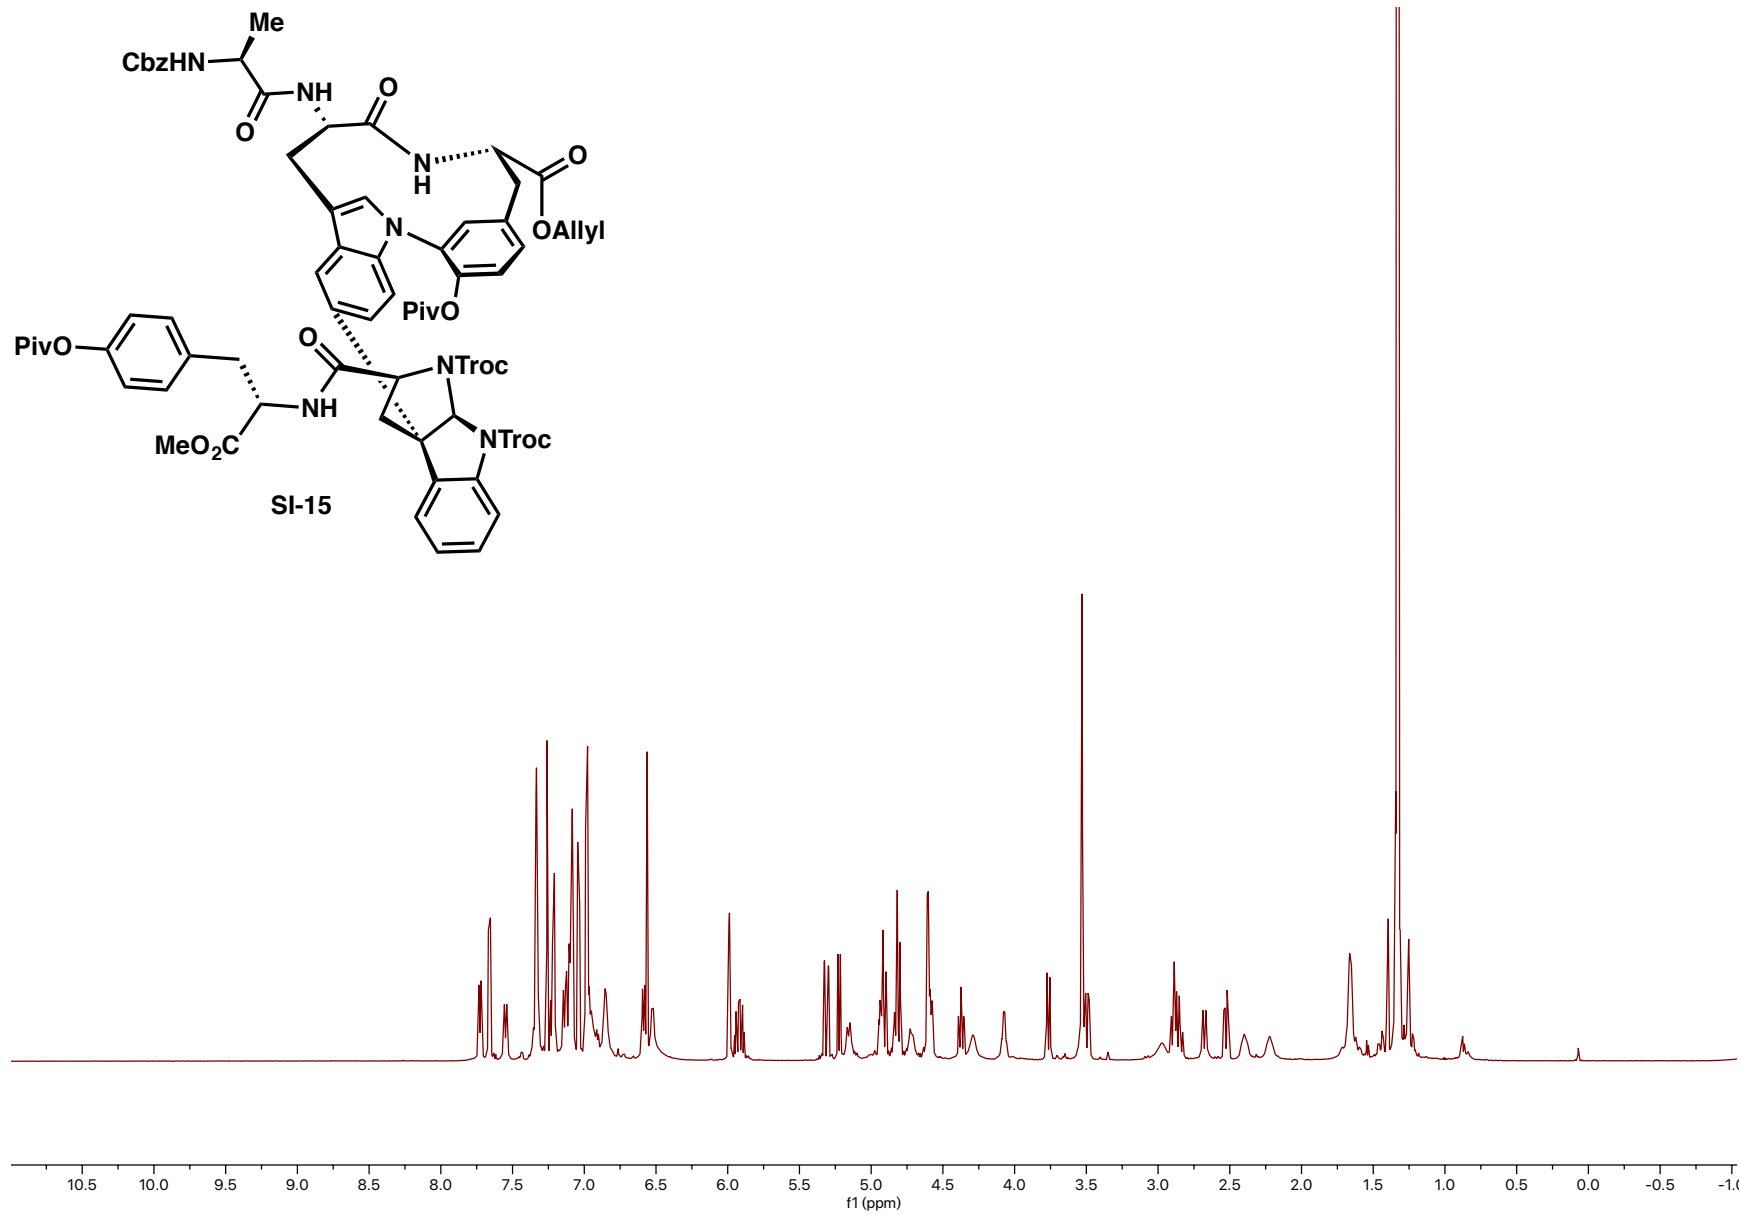

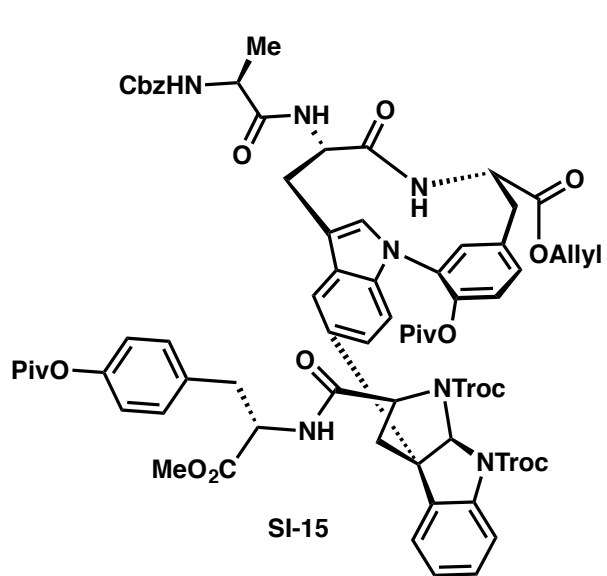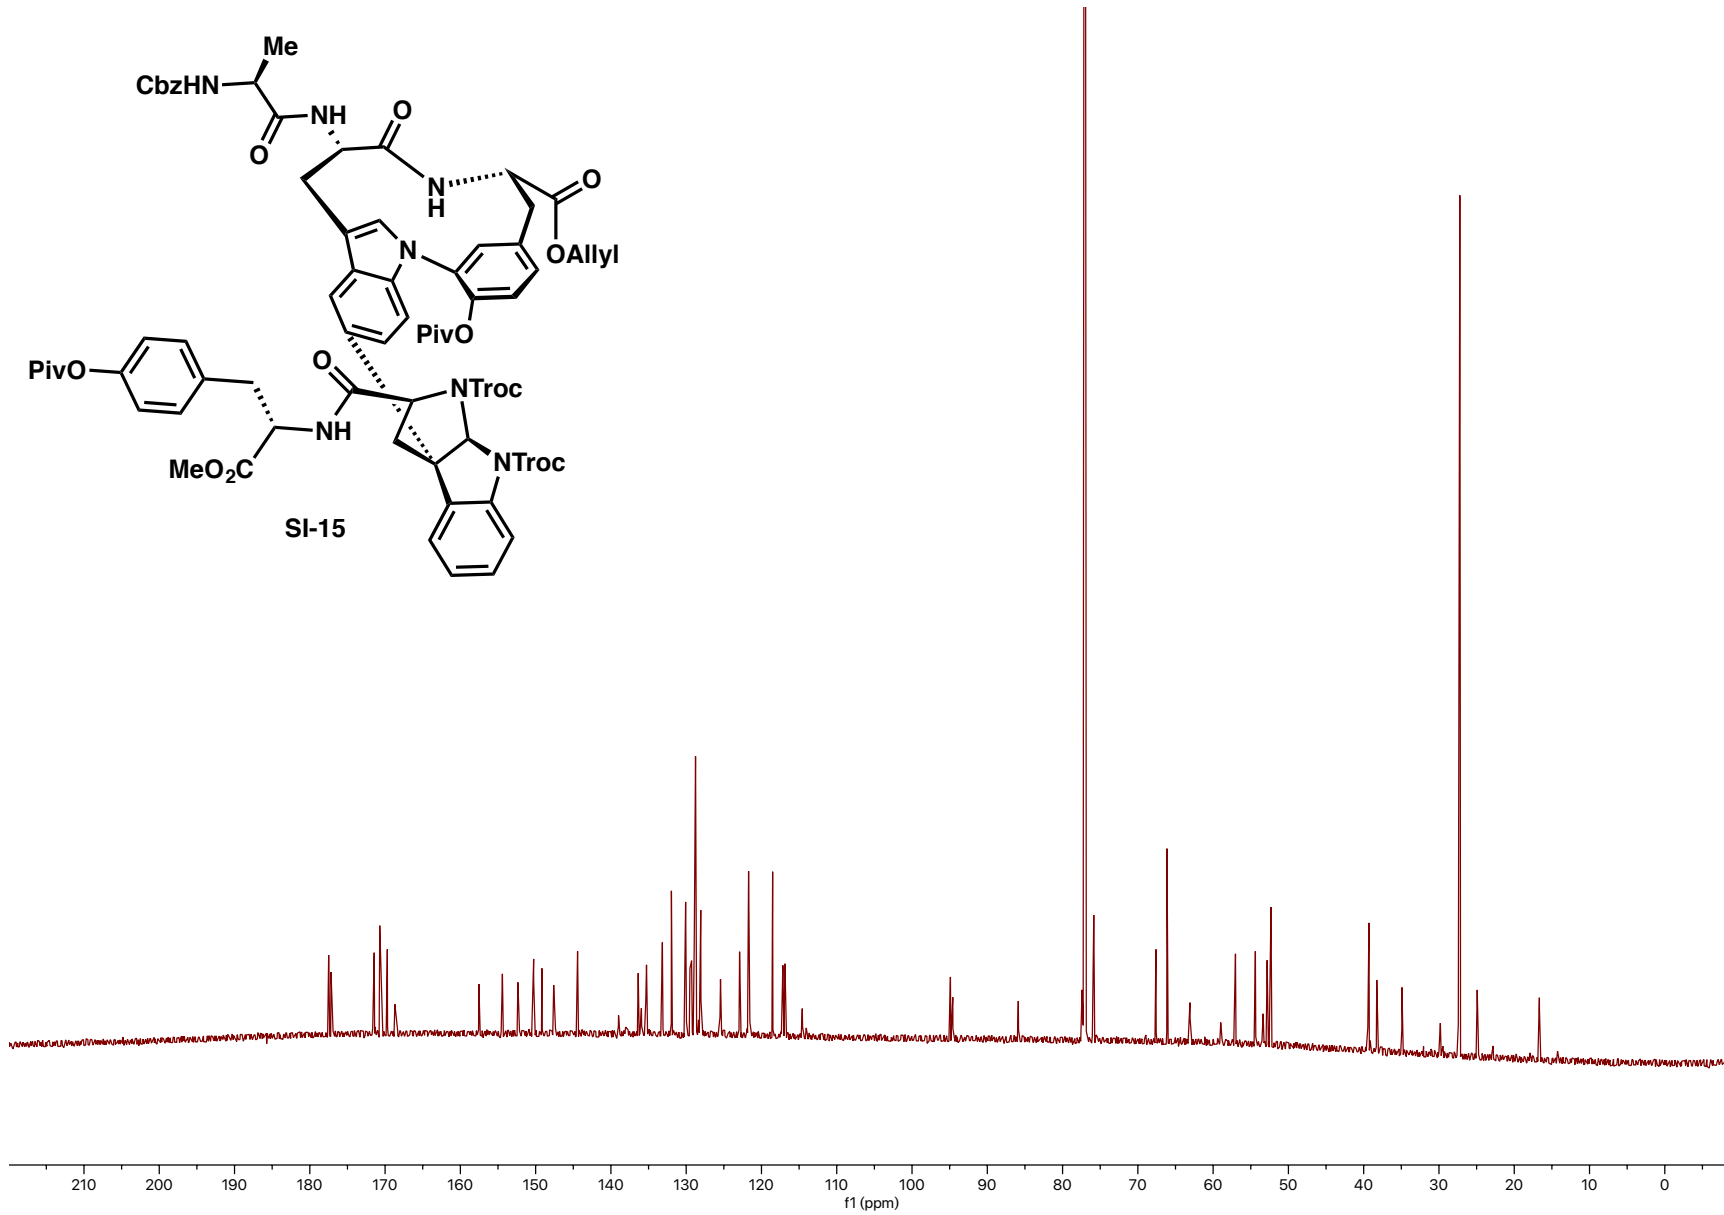



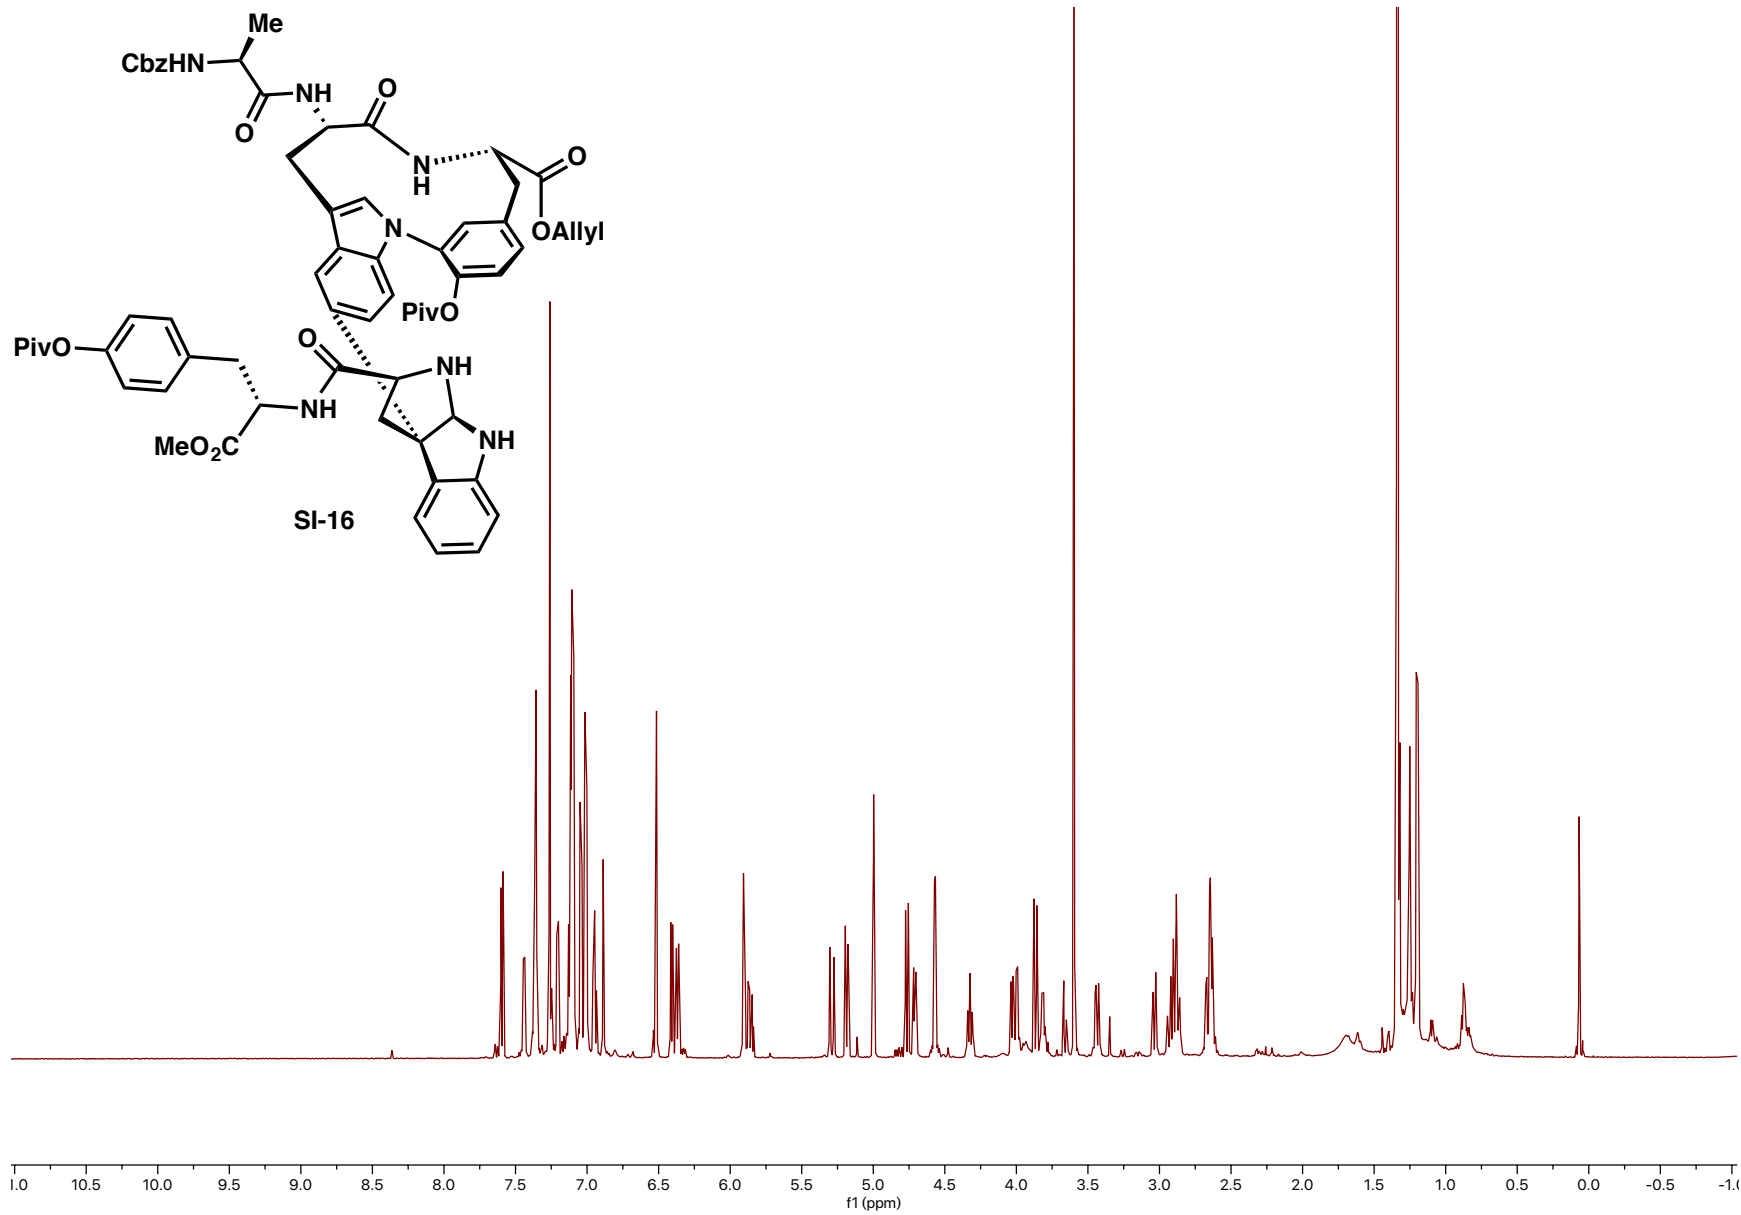

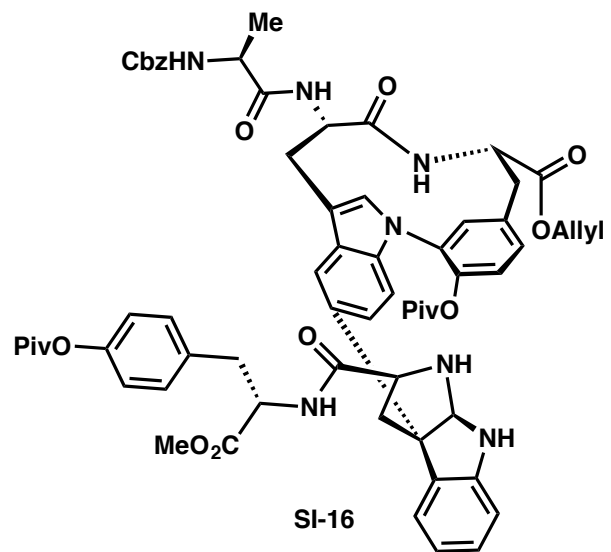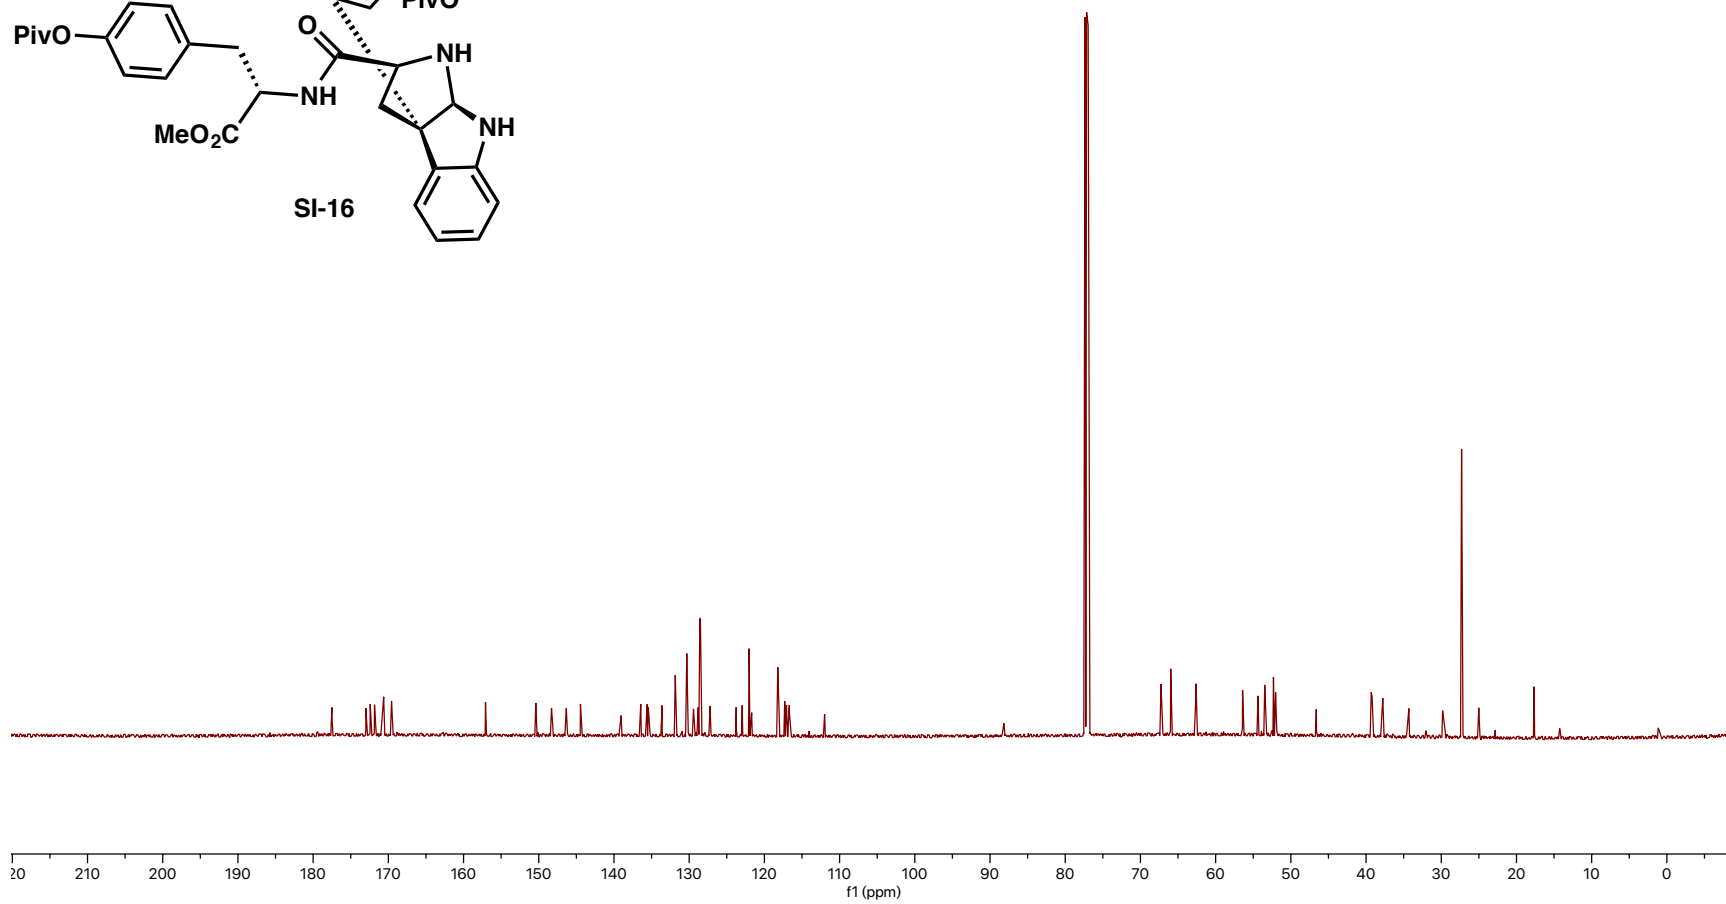

HATU-last

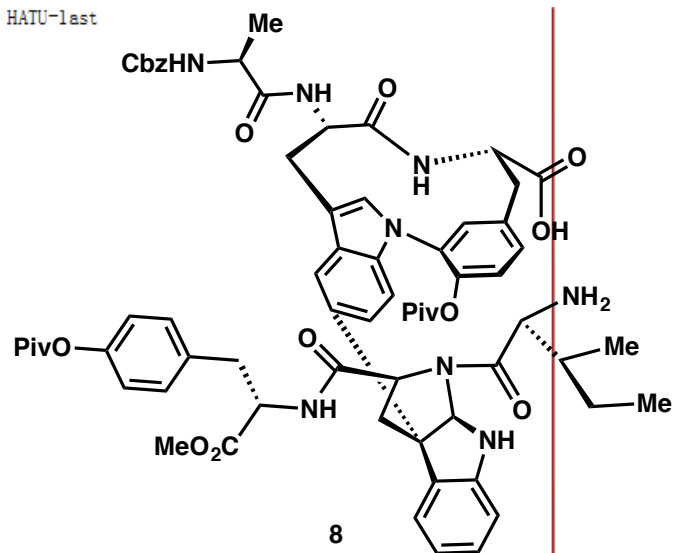

*Not assigned due to rotamerism*

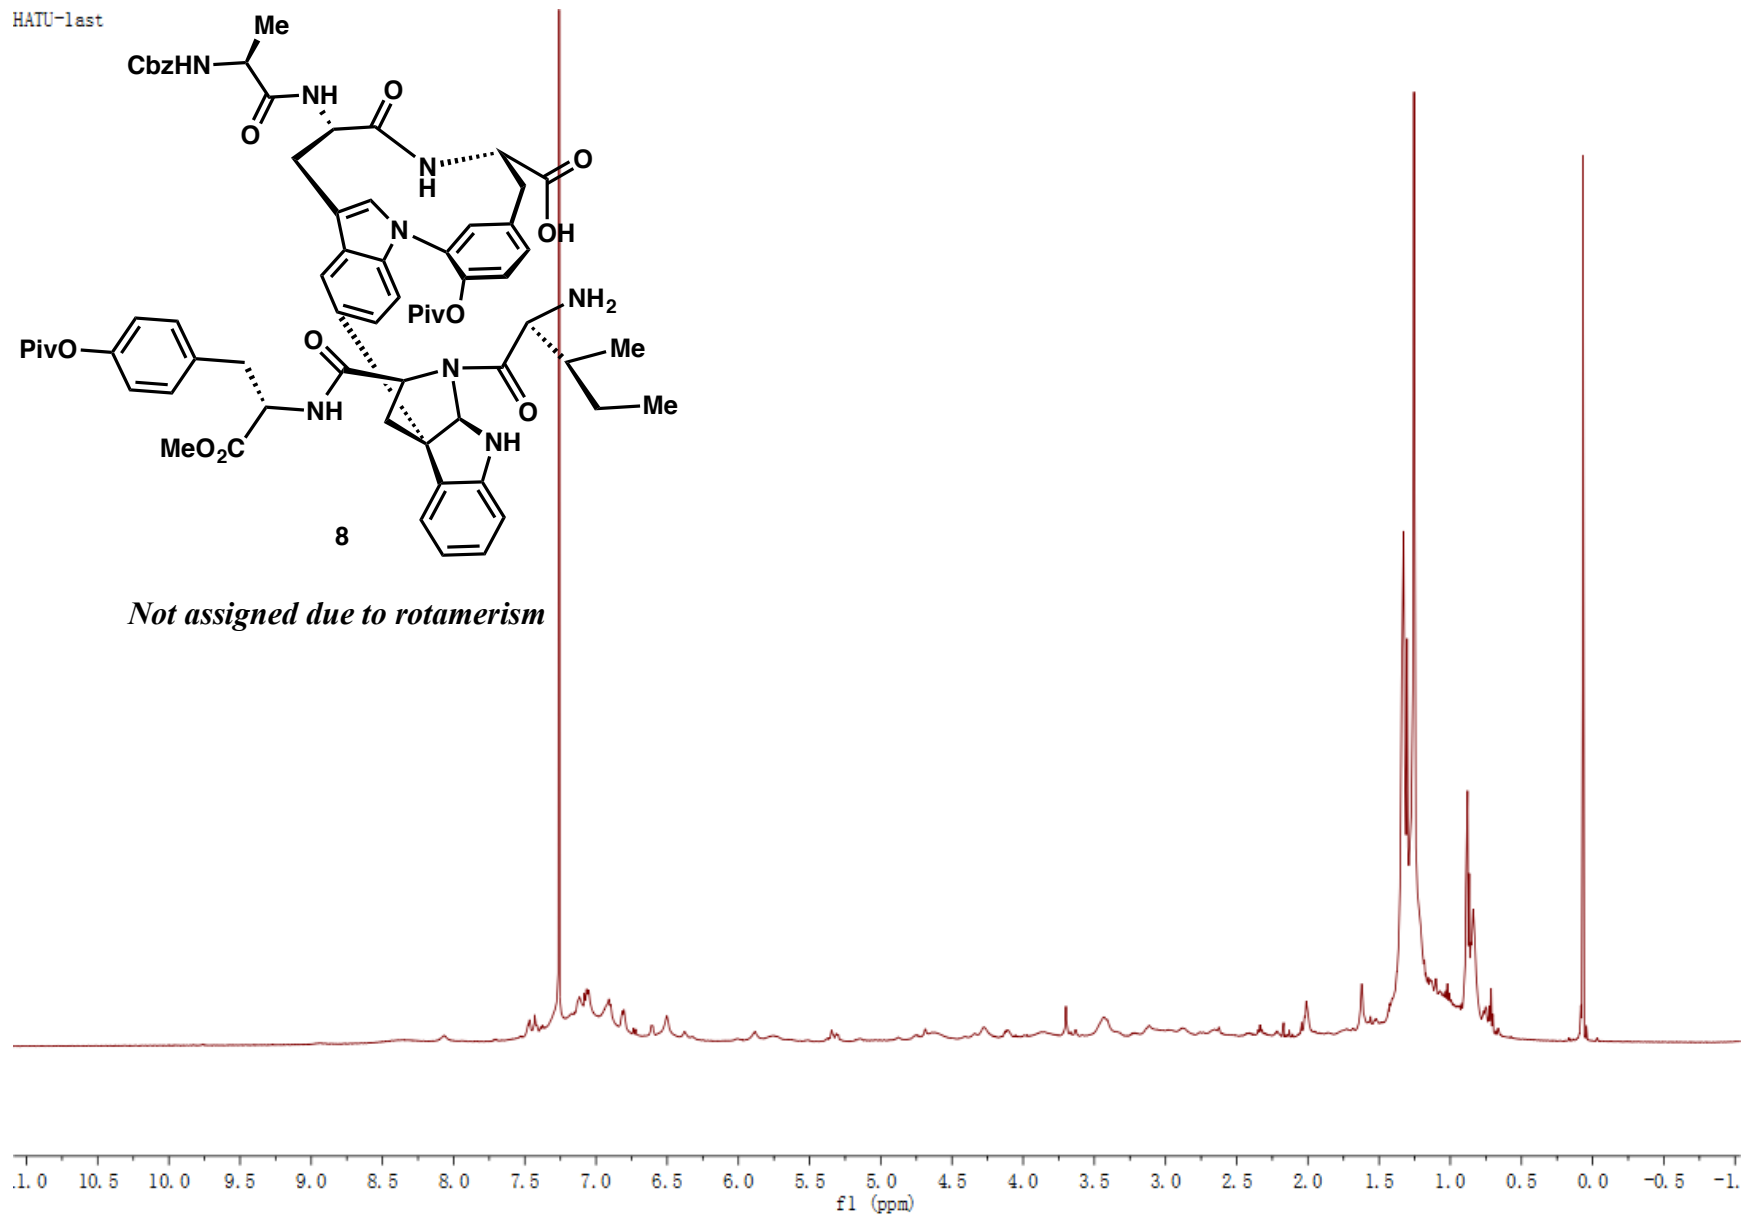

SHR-V-304a.1.fid

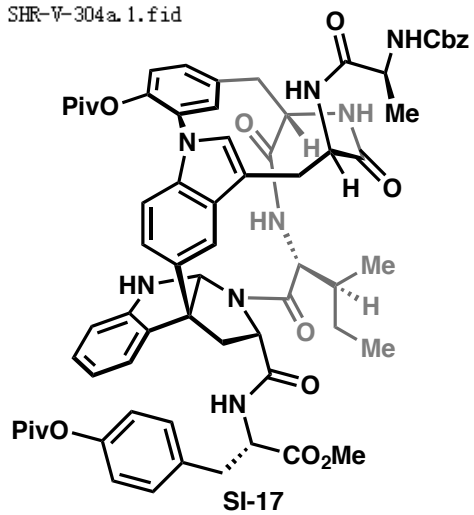

*Not assigned due to rotamerism*

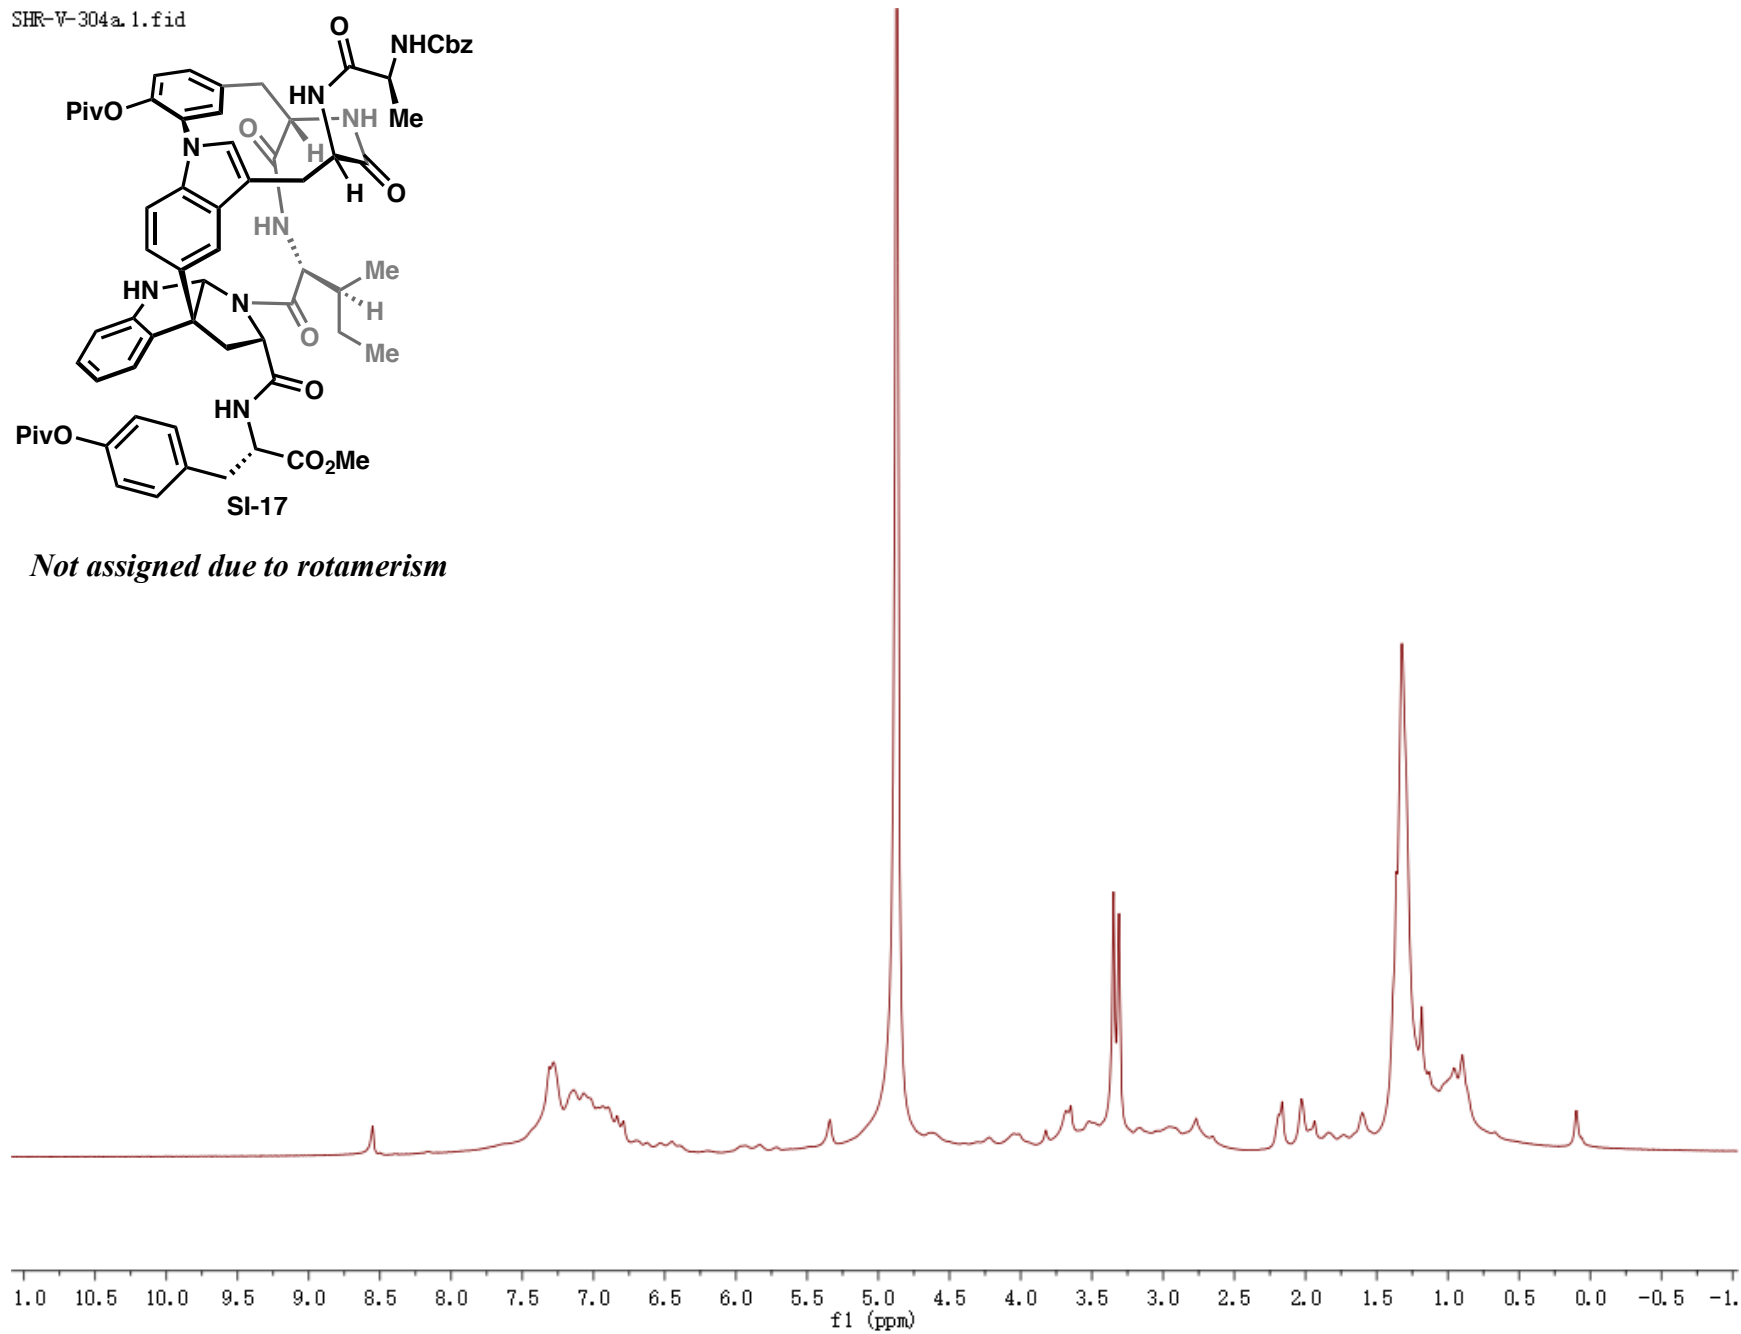

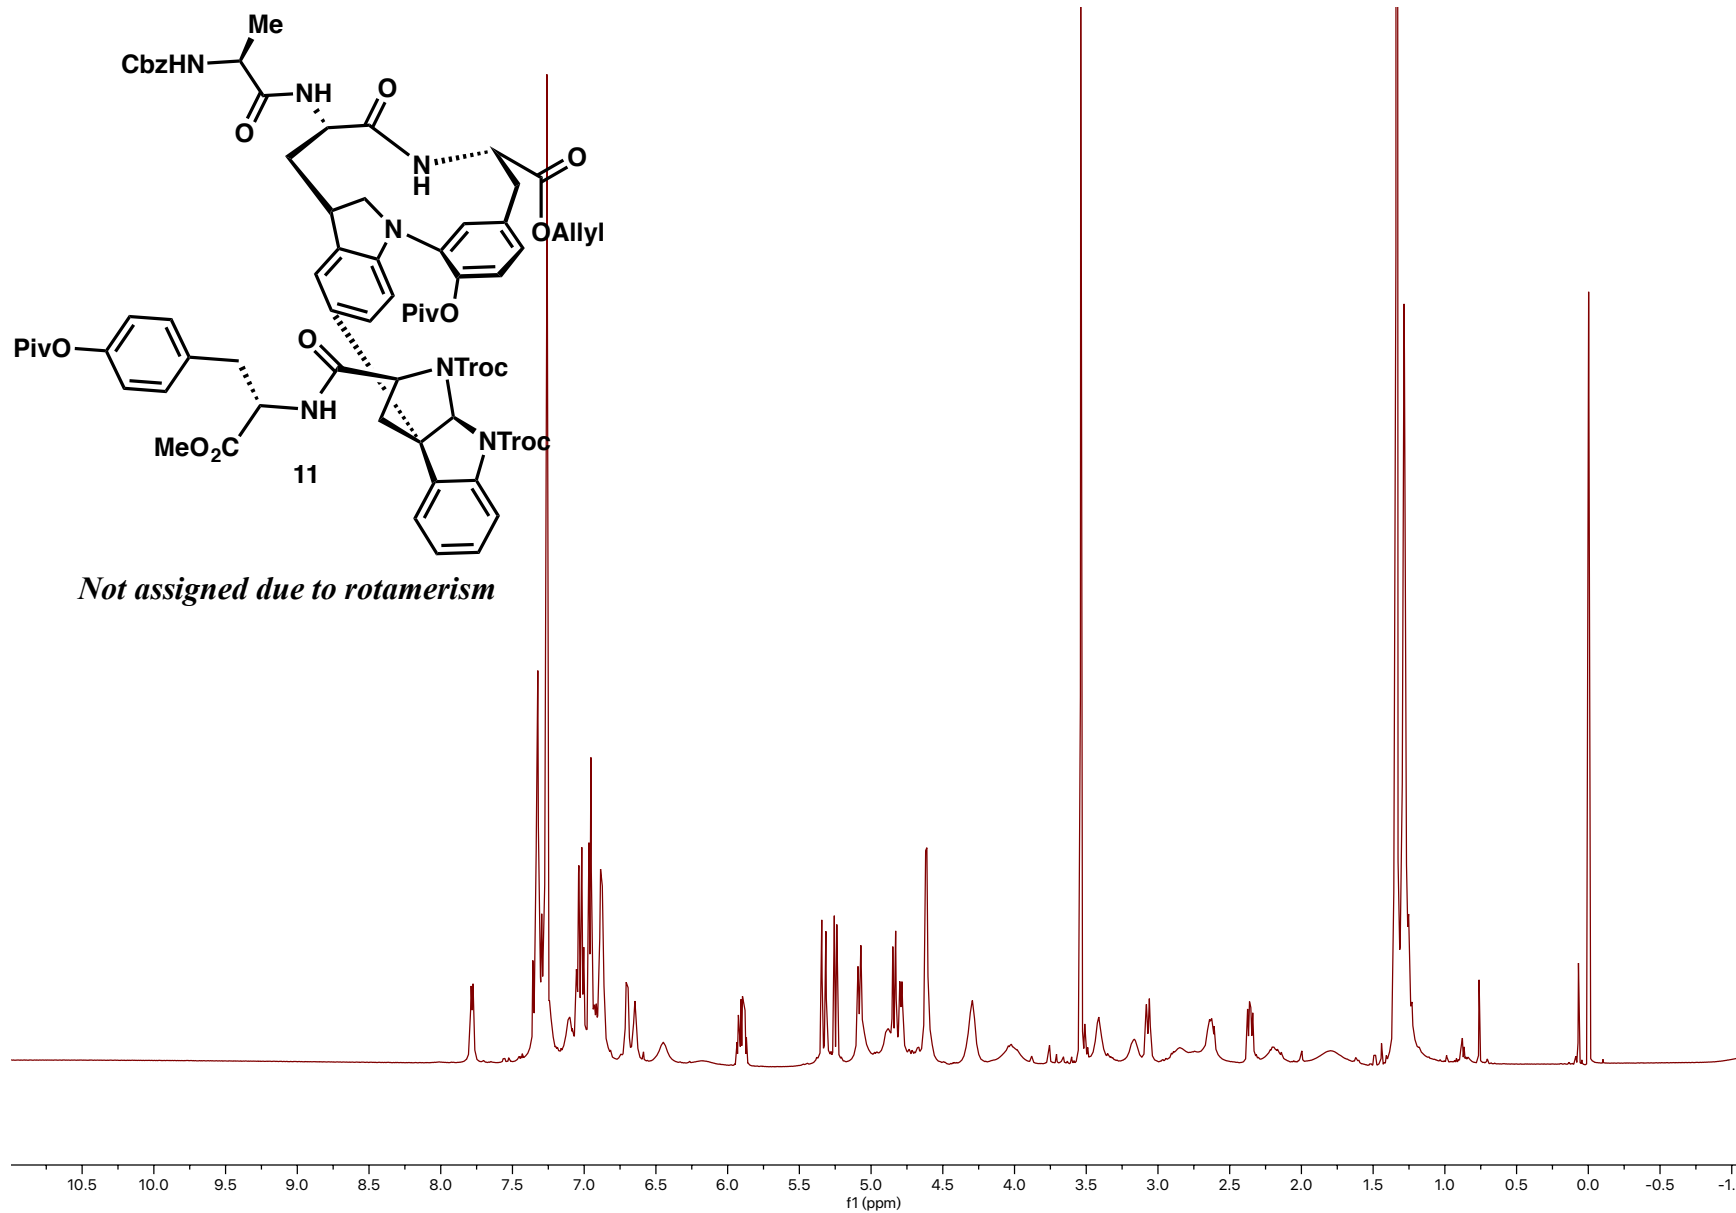

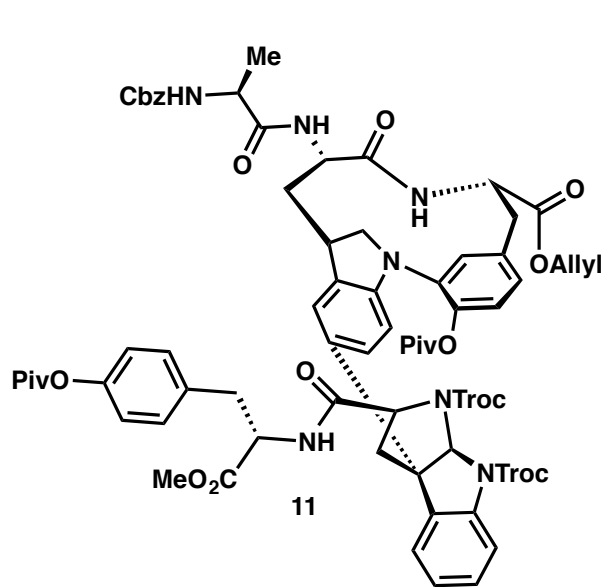

*Not assigned due to rotamerism*

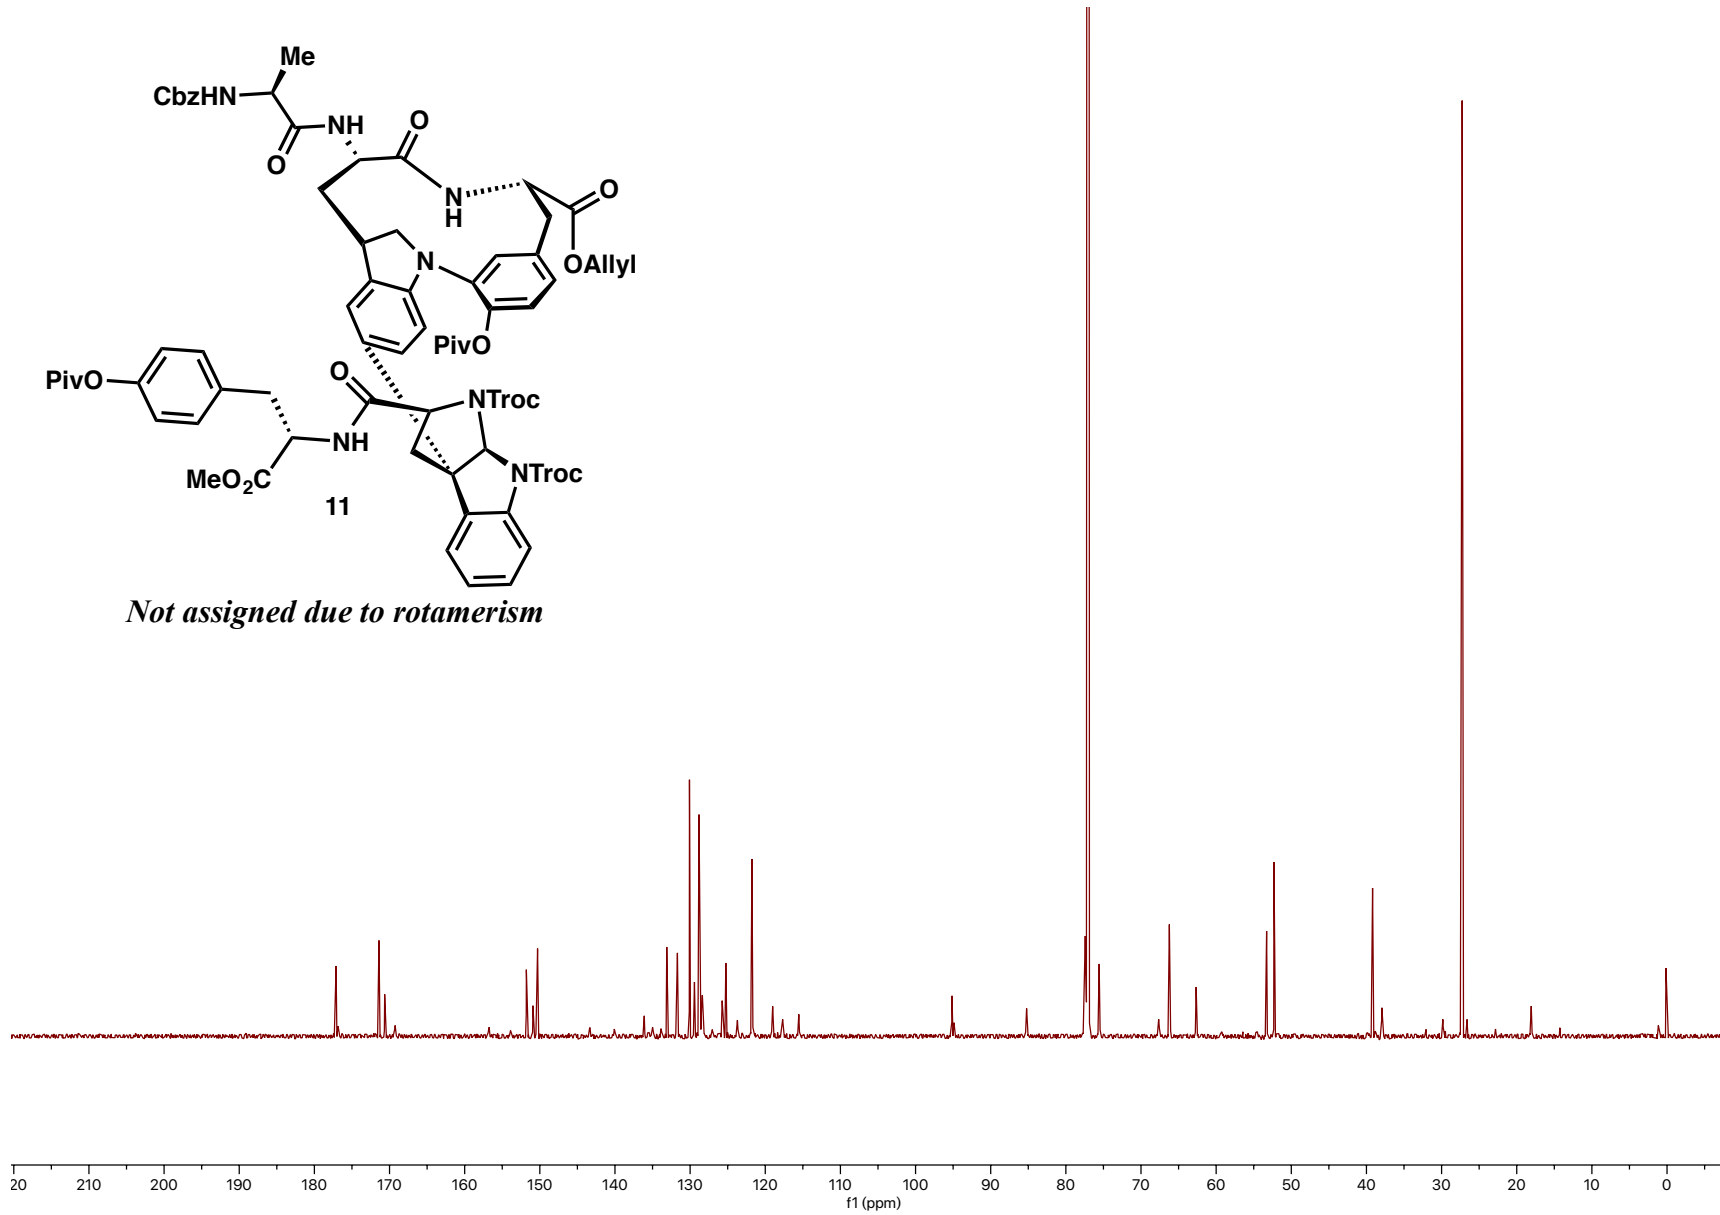

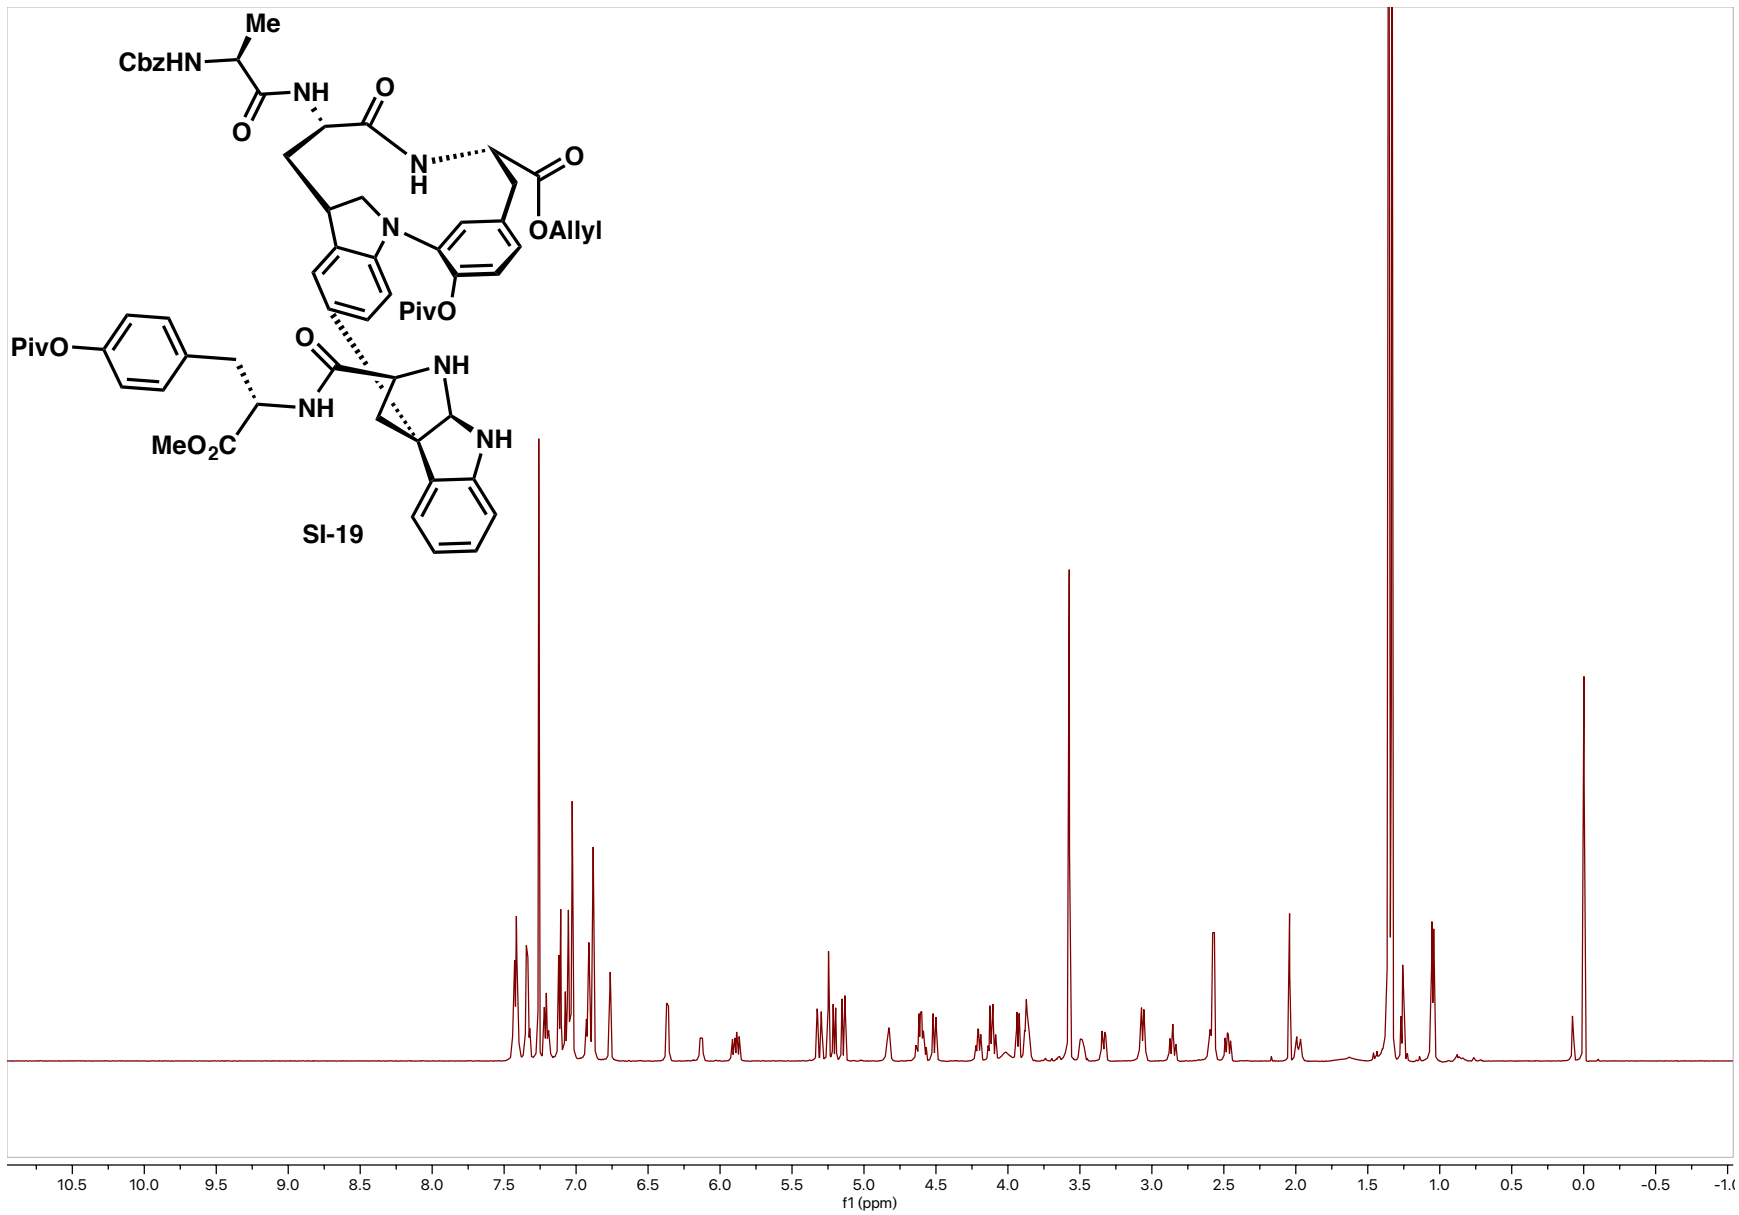

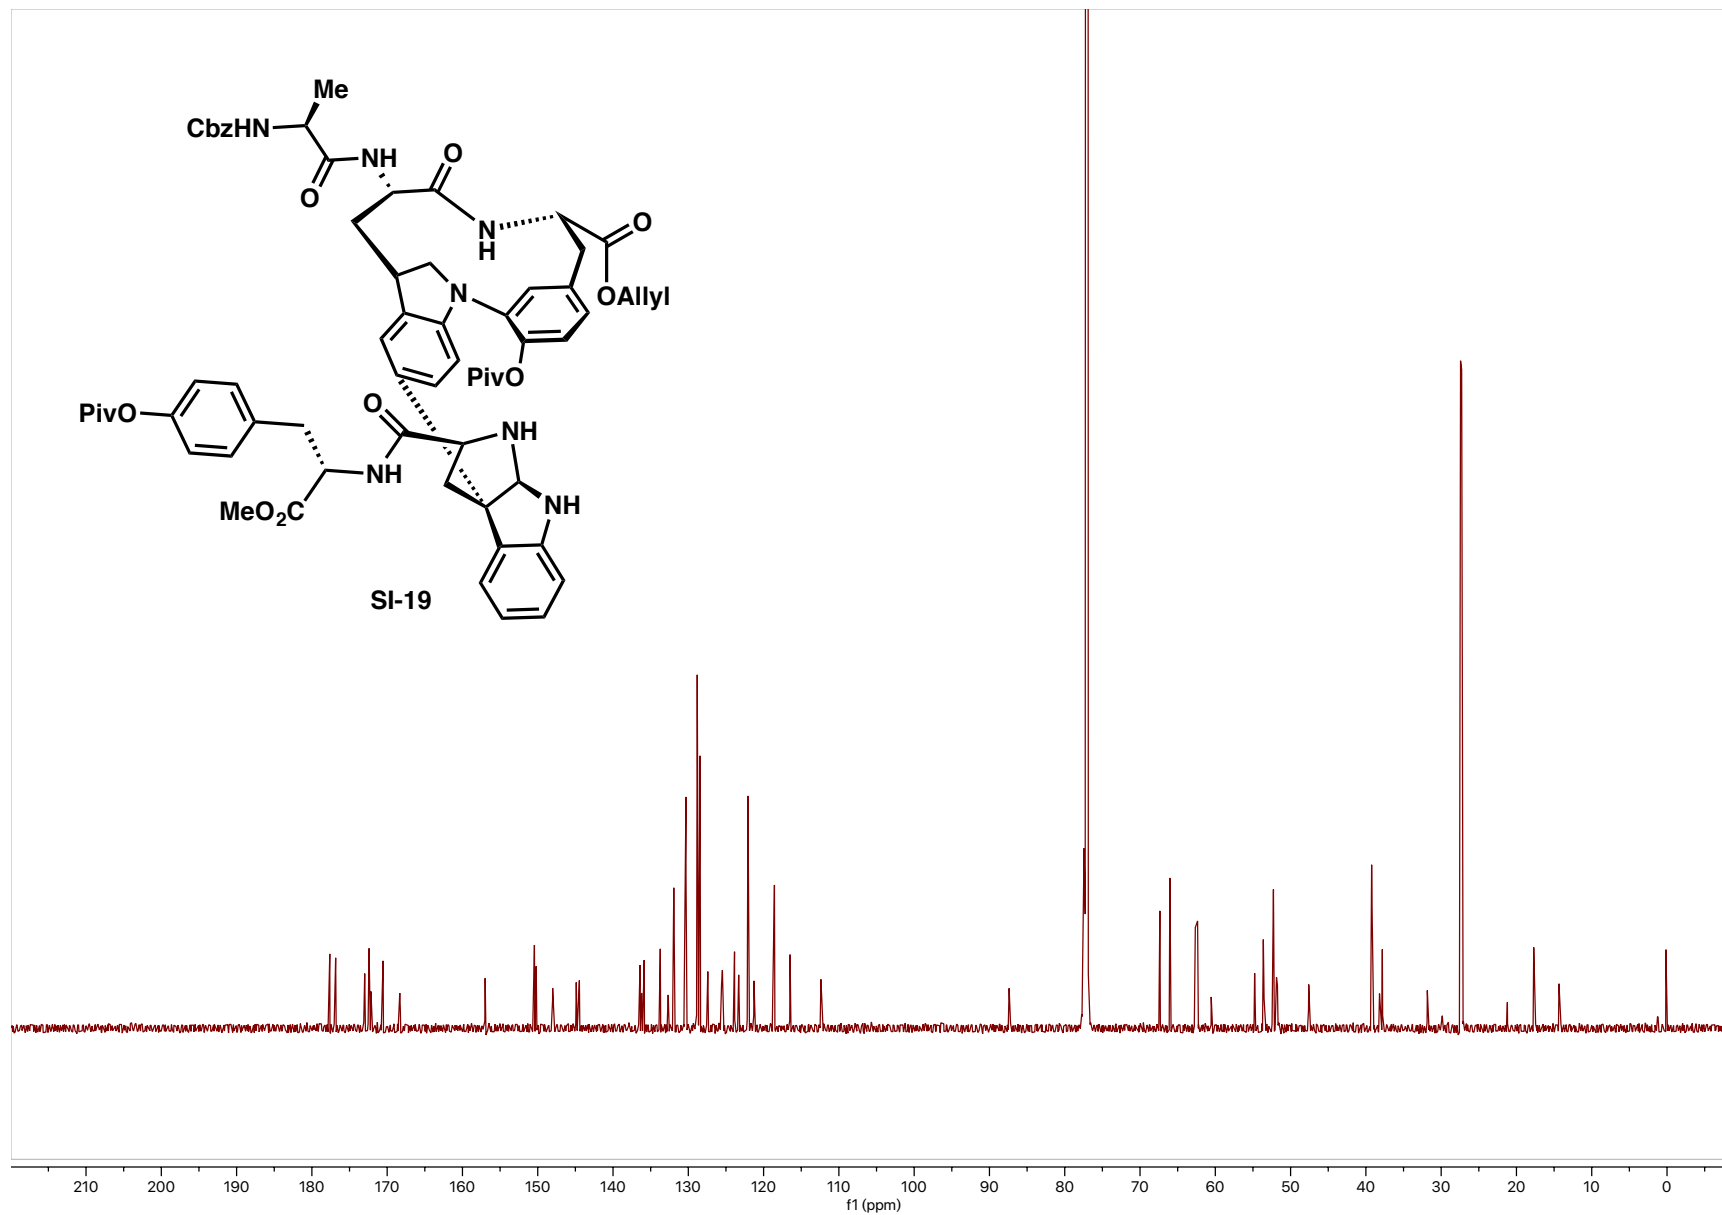



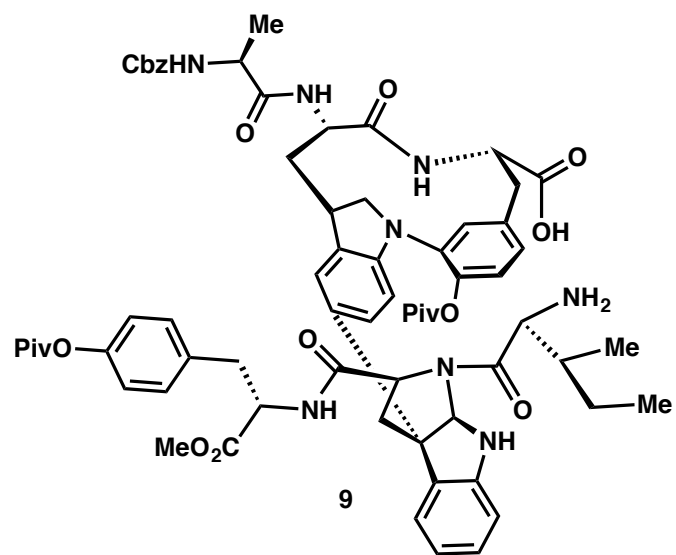

*Not assigned due to rotamerism*

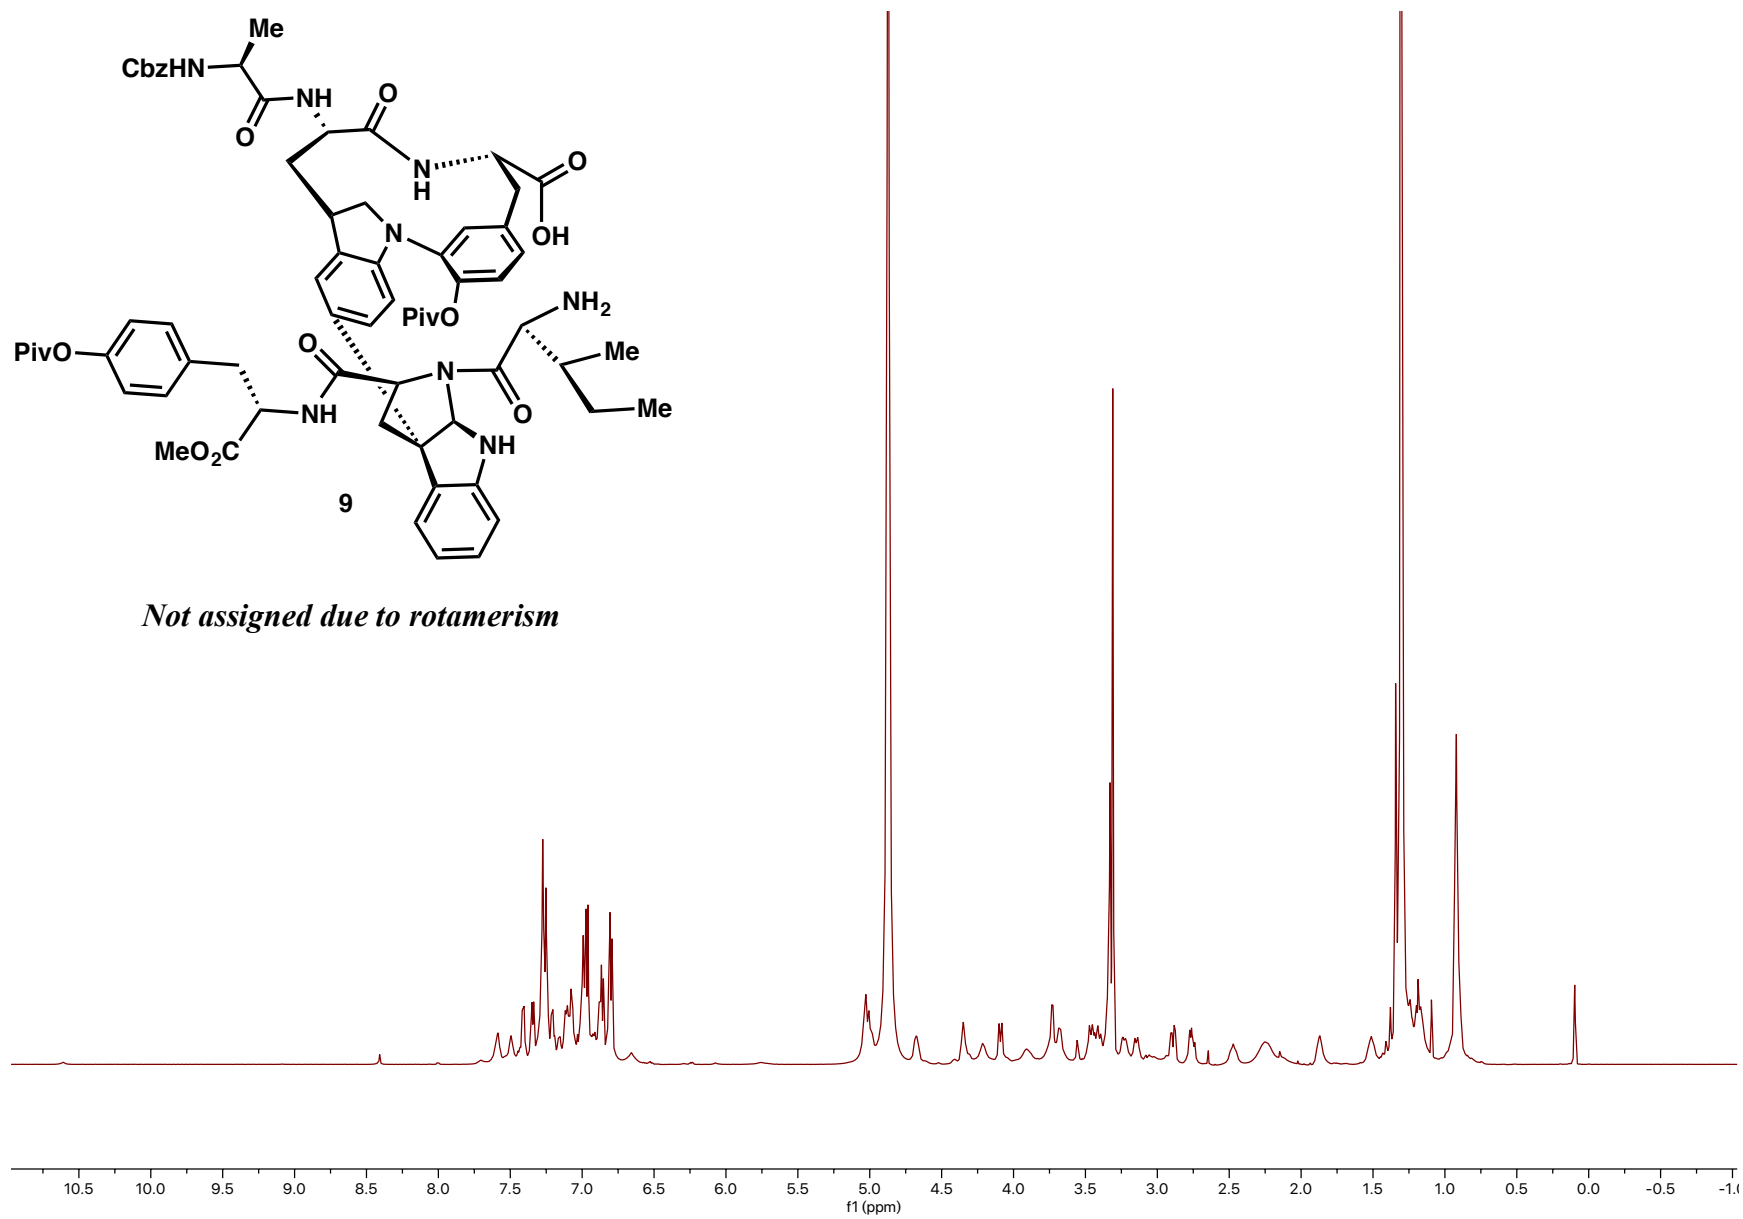

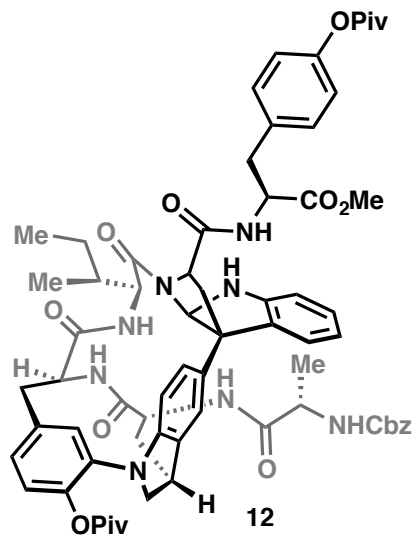

*Not assigned due to rotamerism*

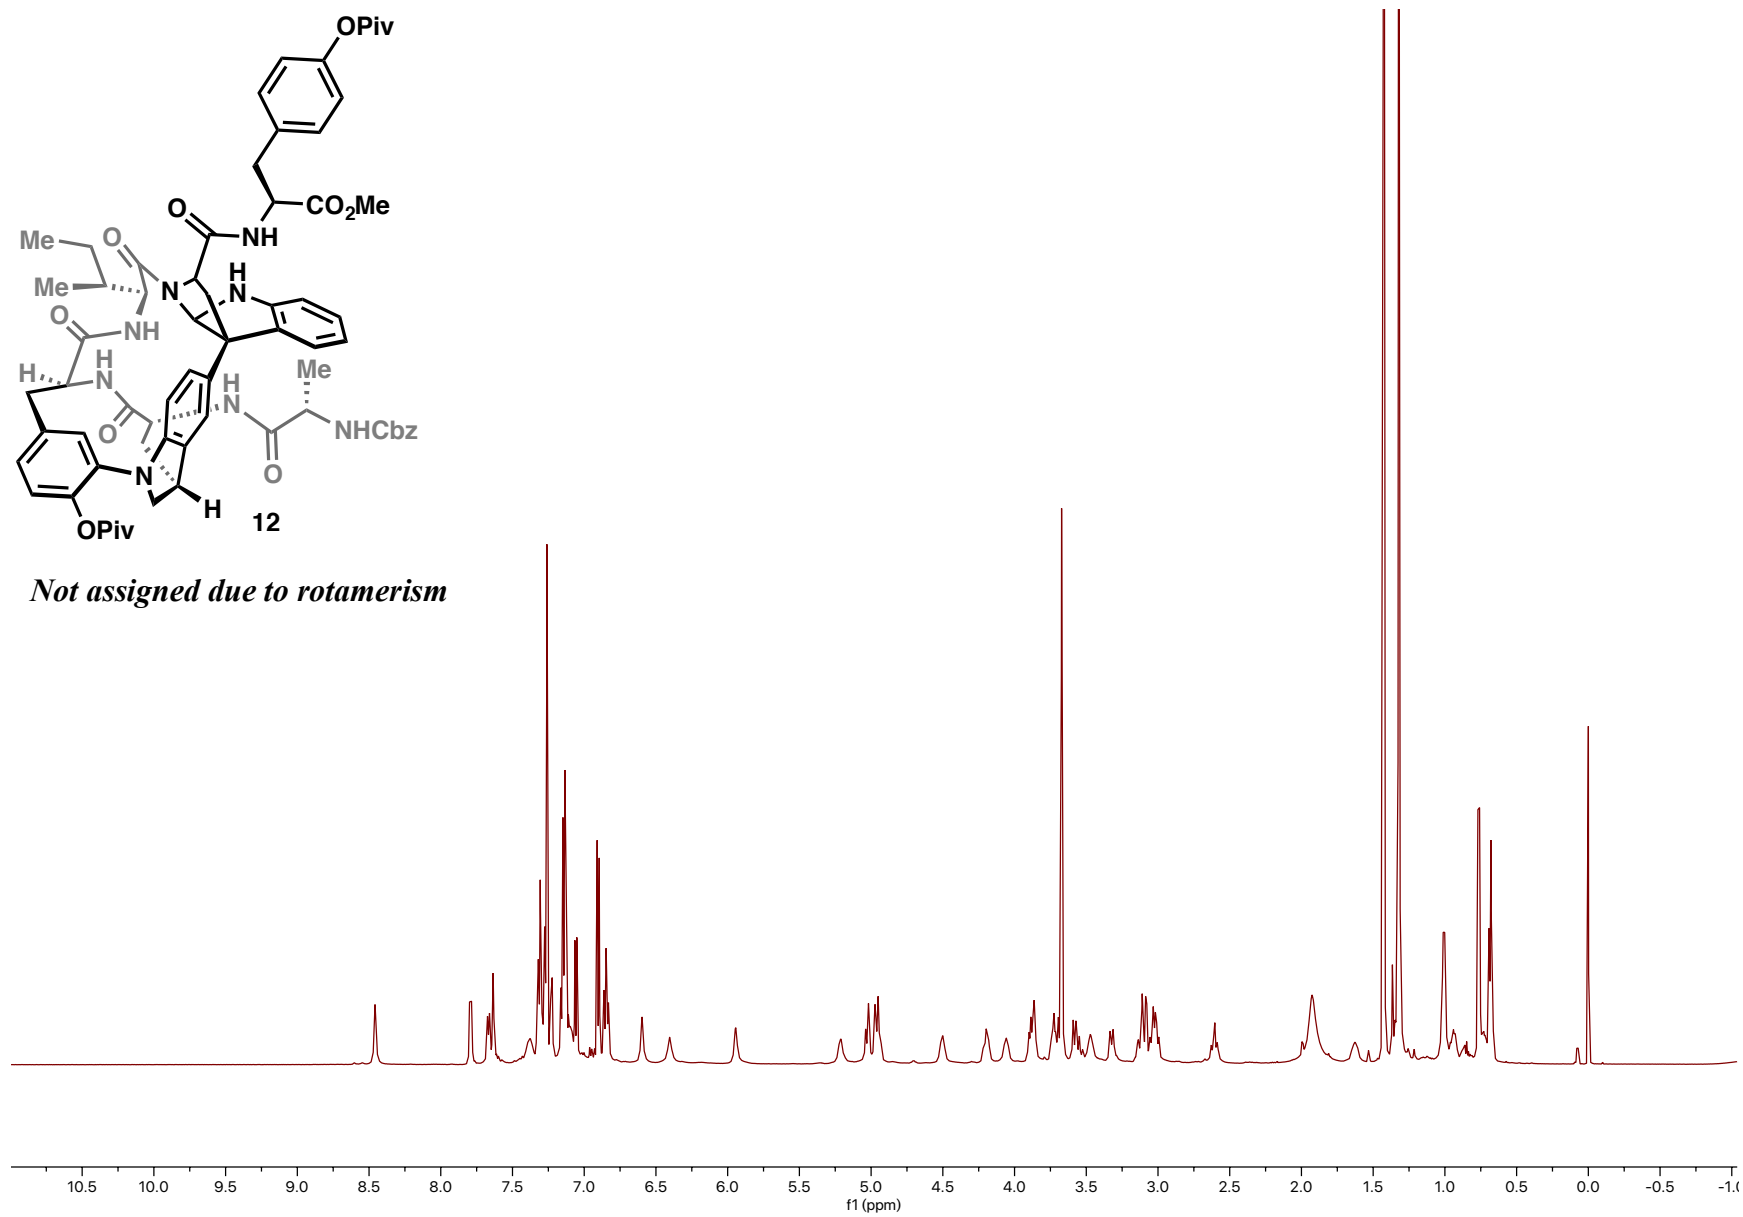

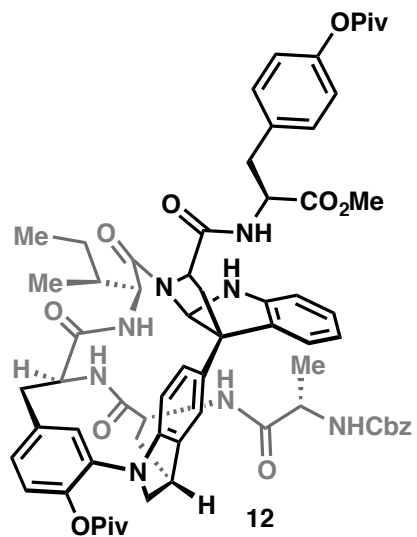

*Not assigned due to rotamerism*

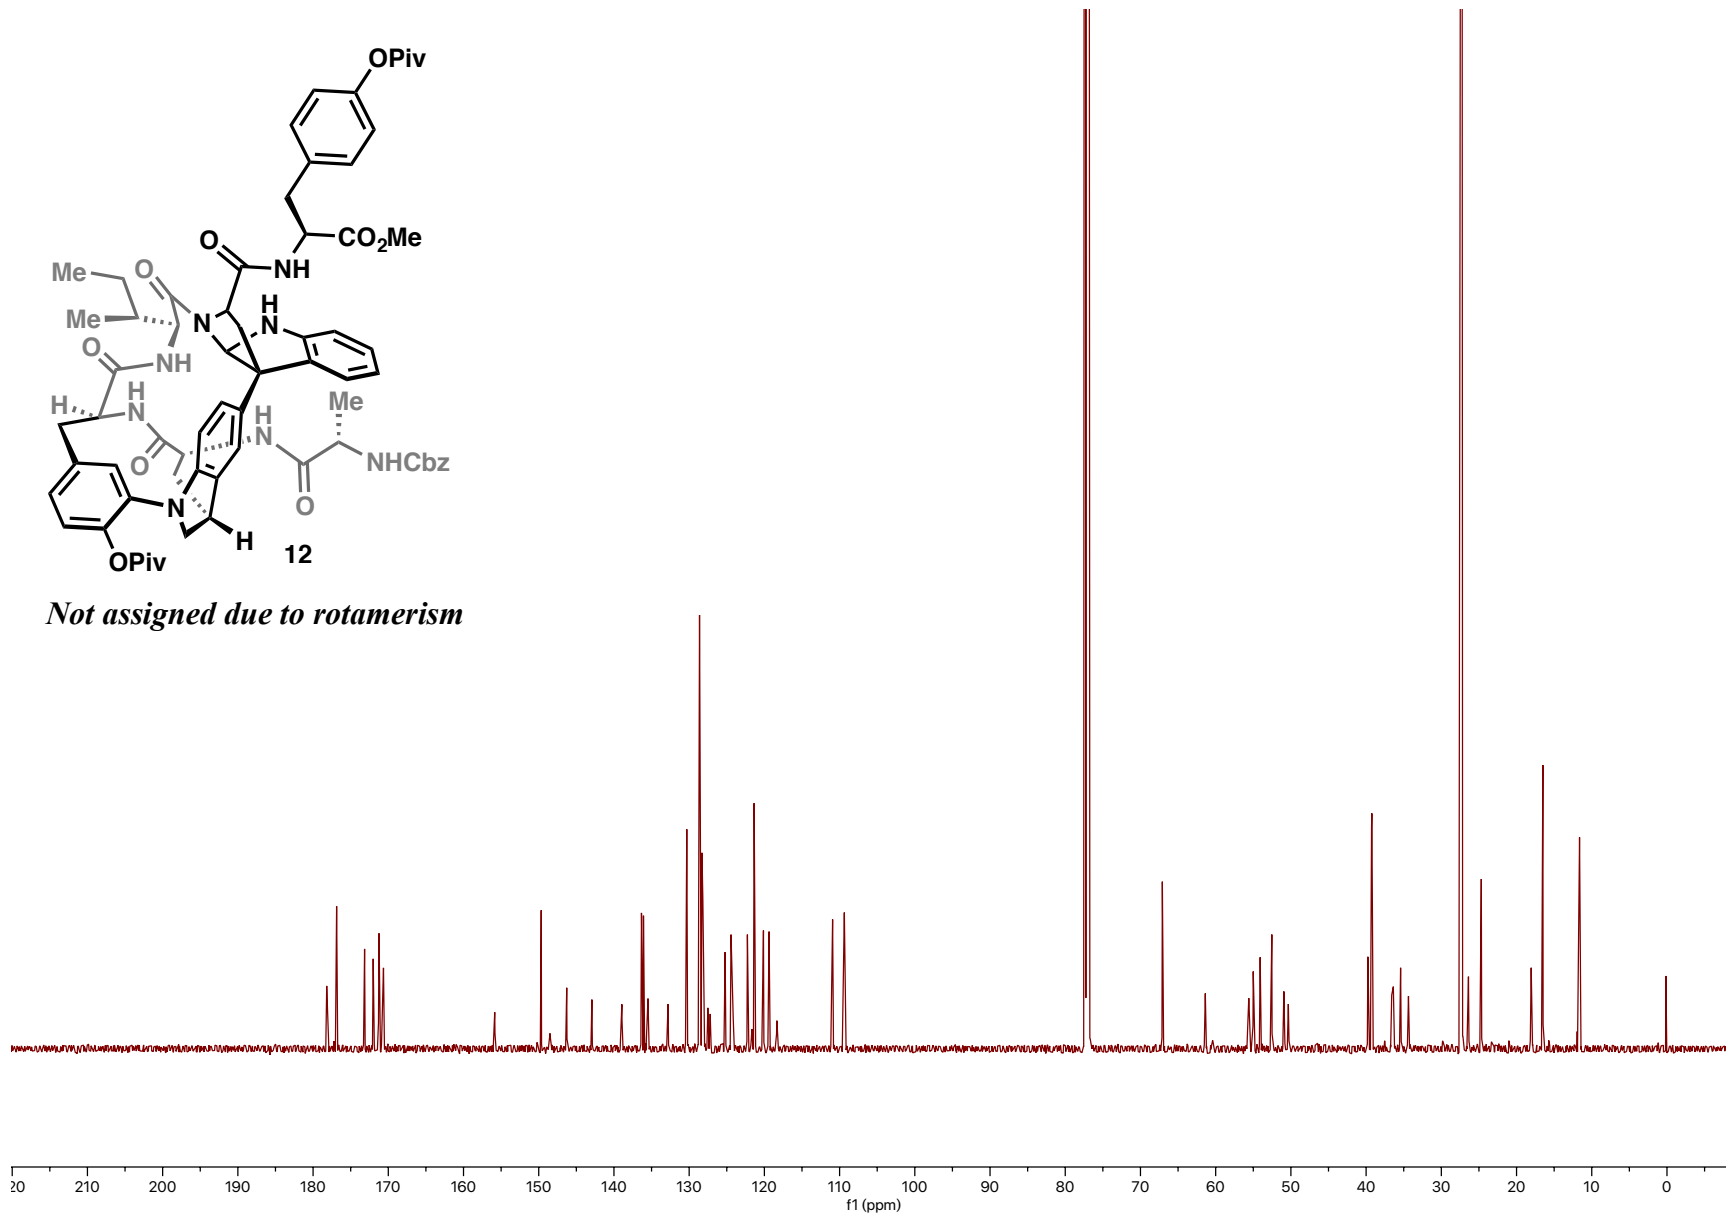

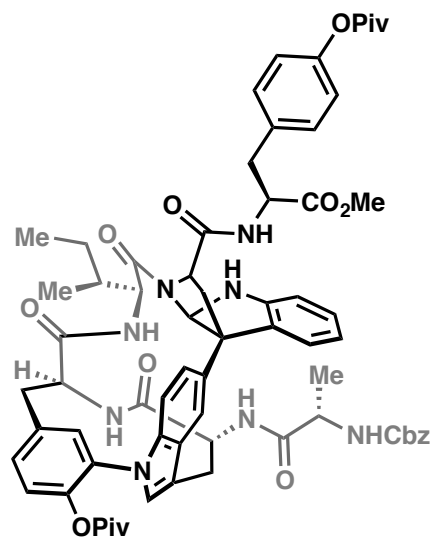

SI-20

*Not assigned due to rotamerism*

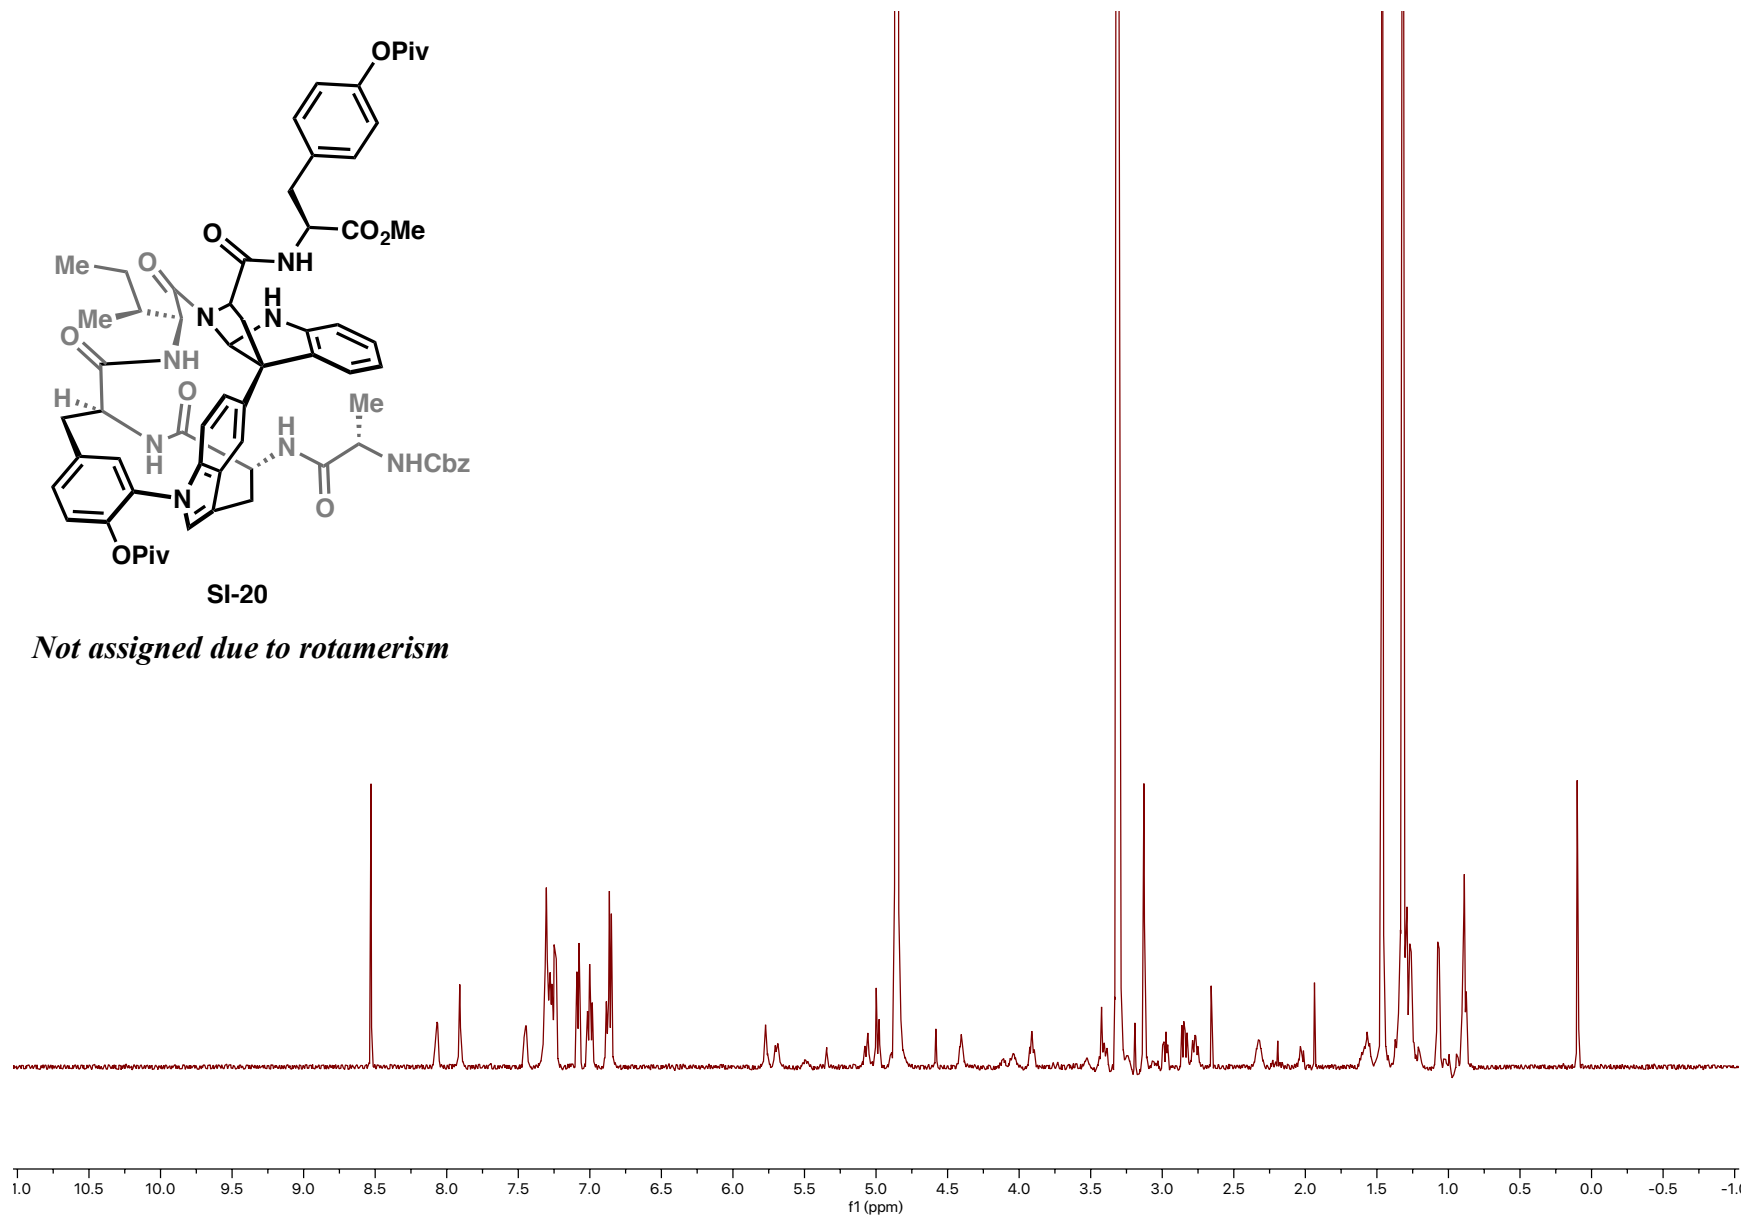

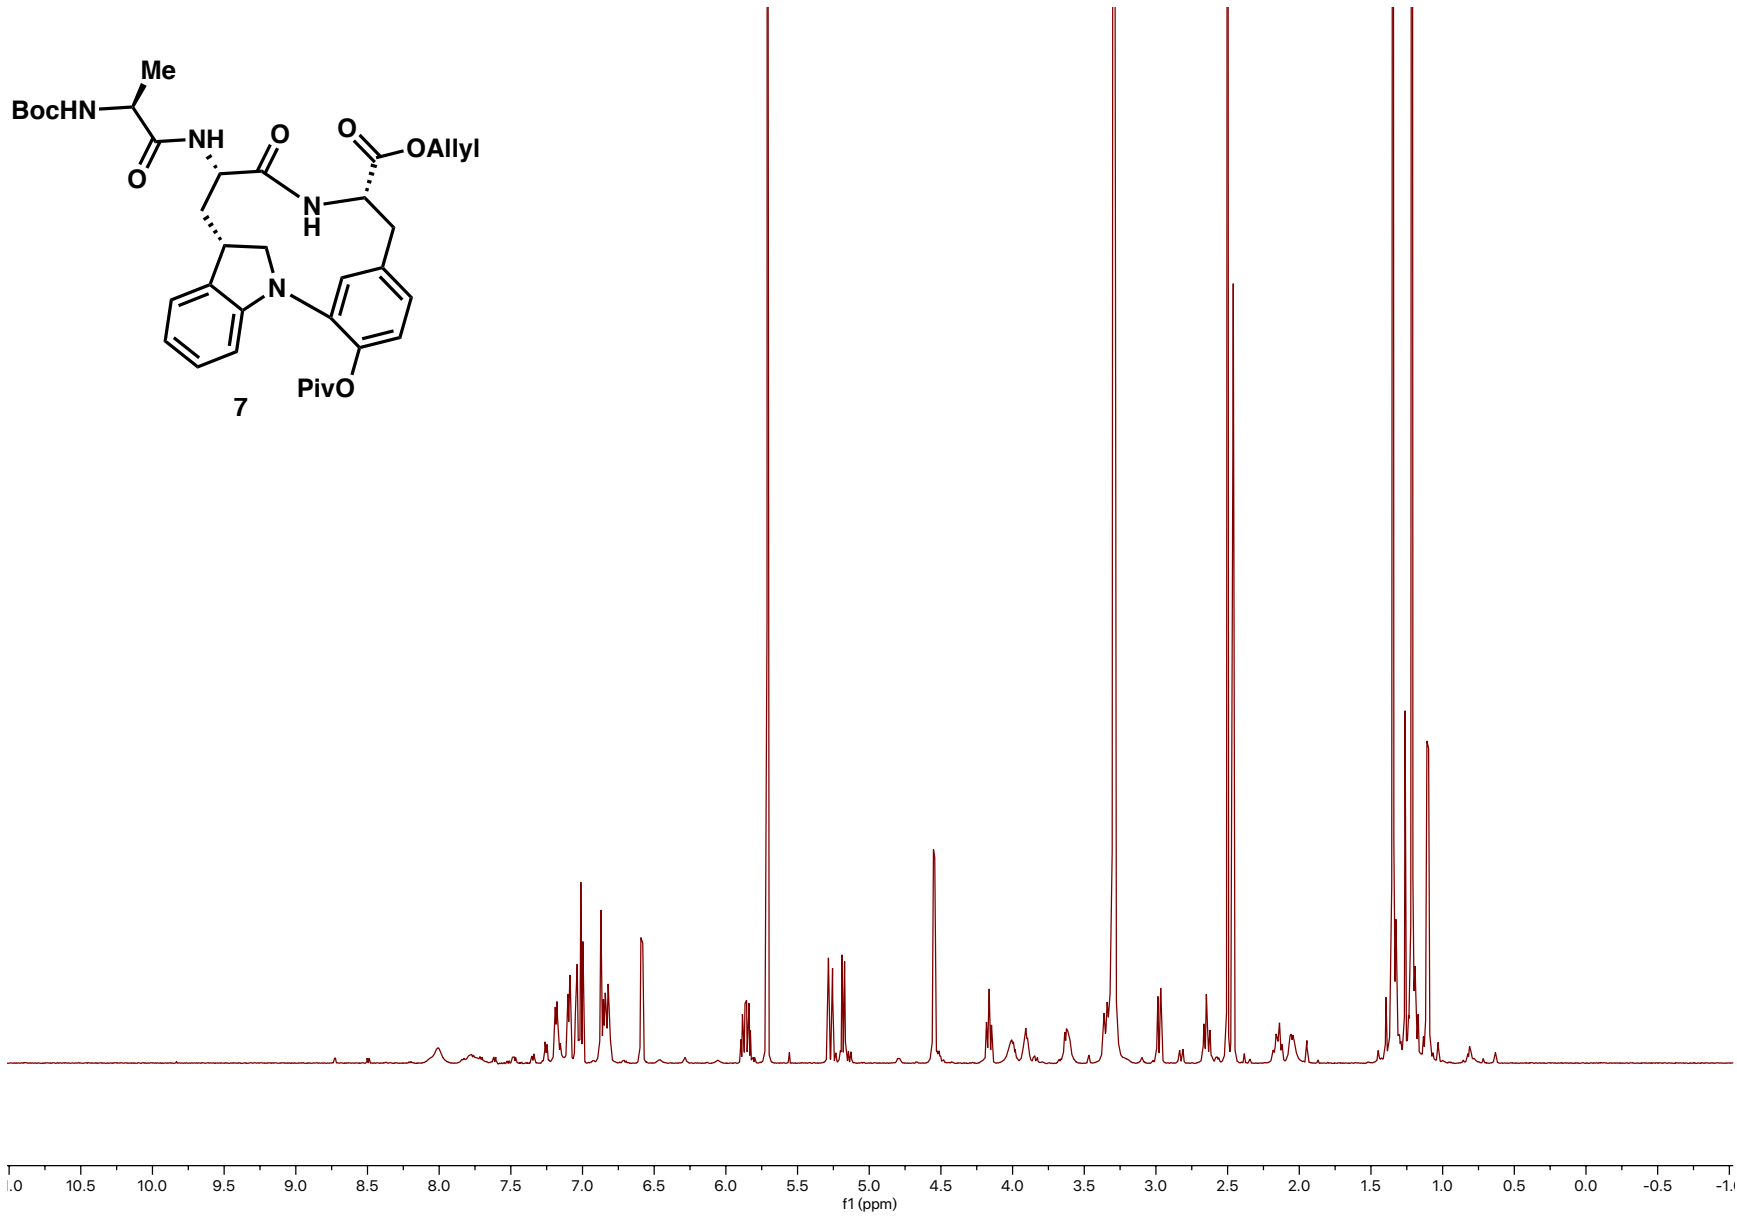

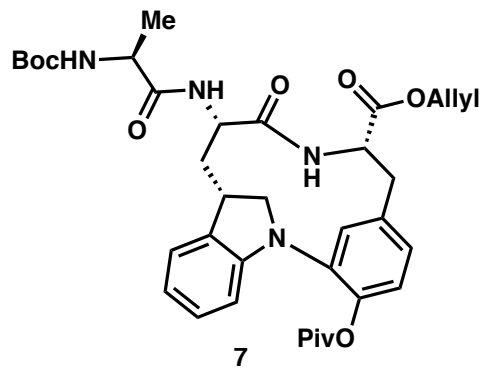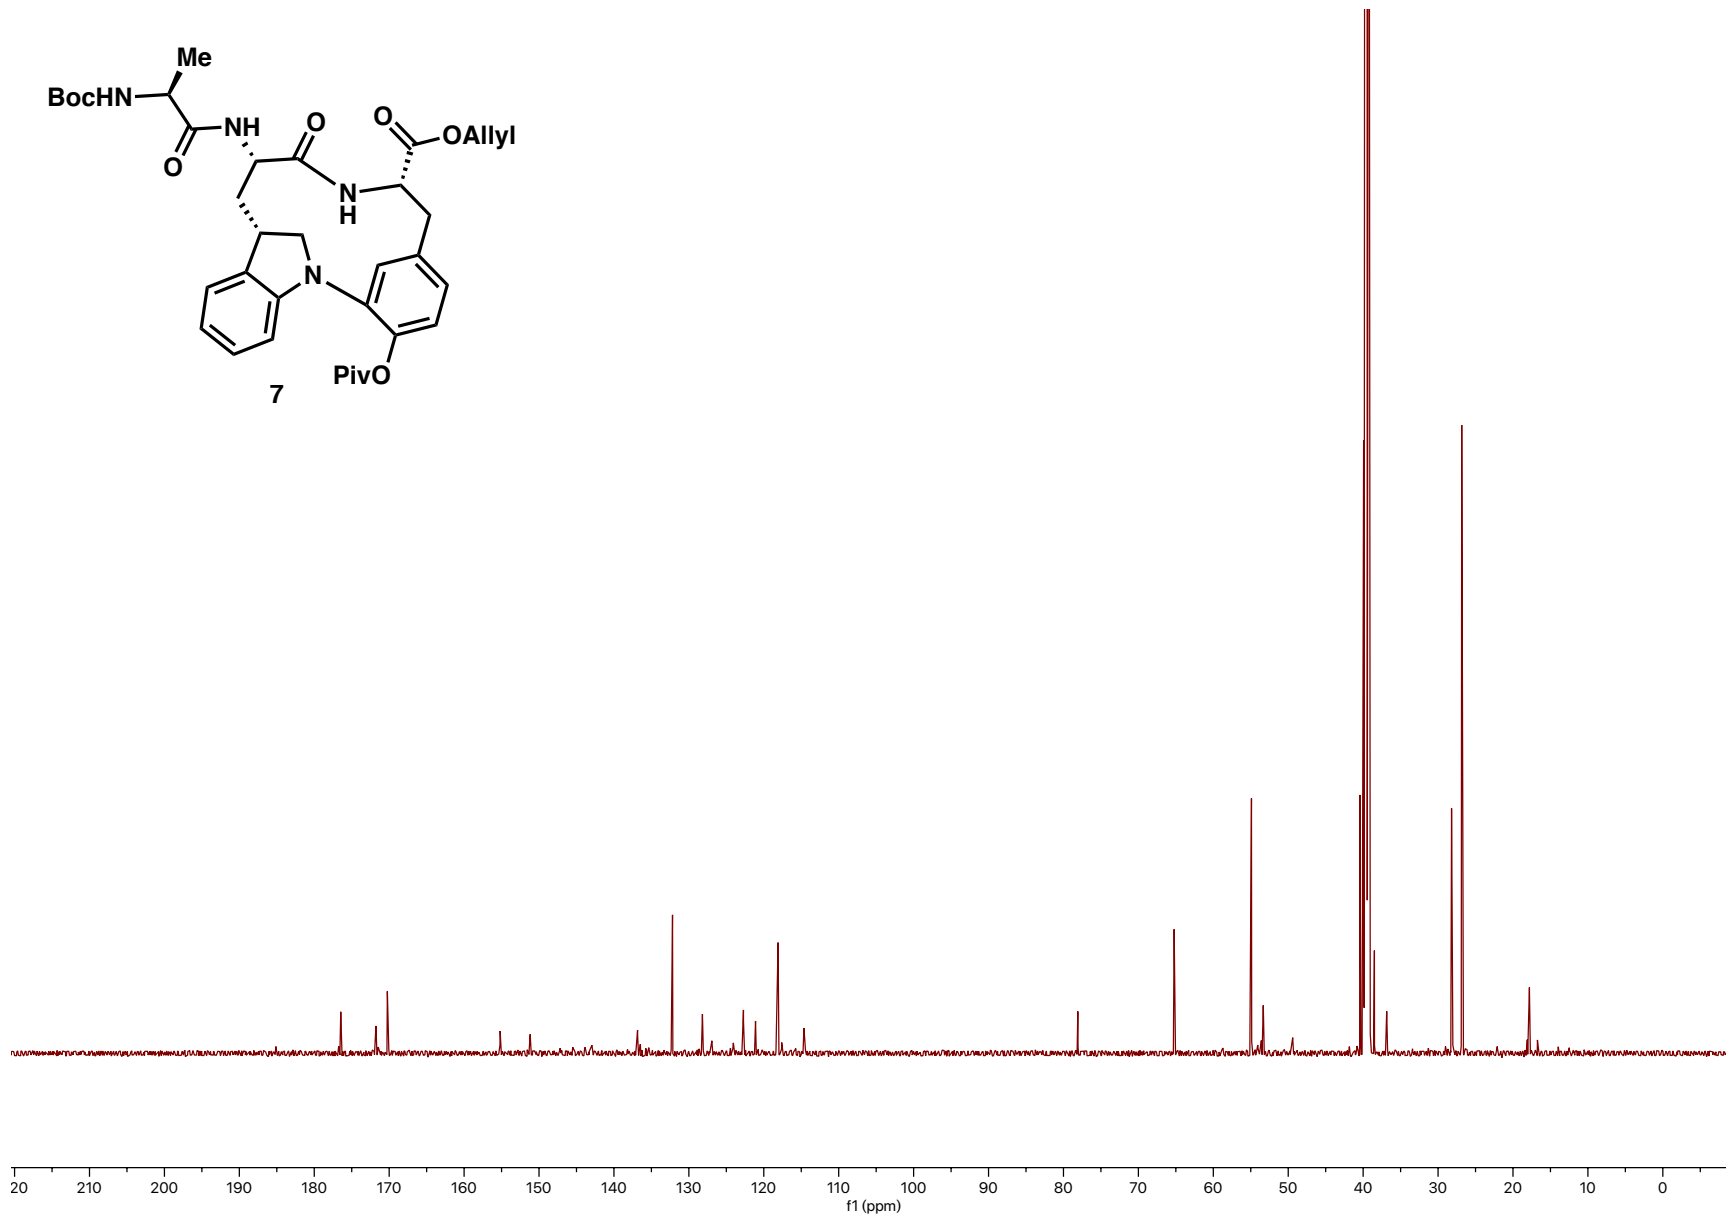

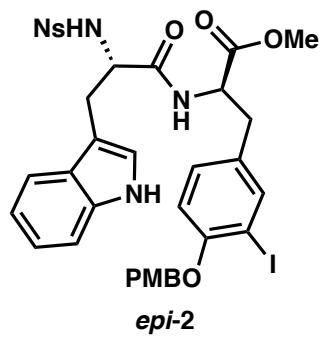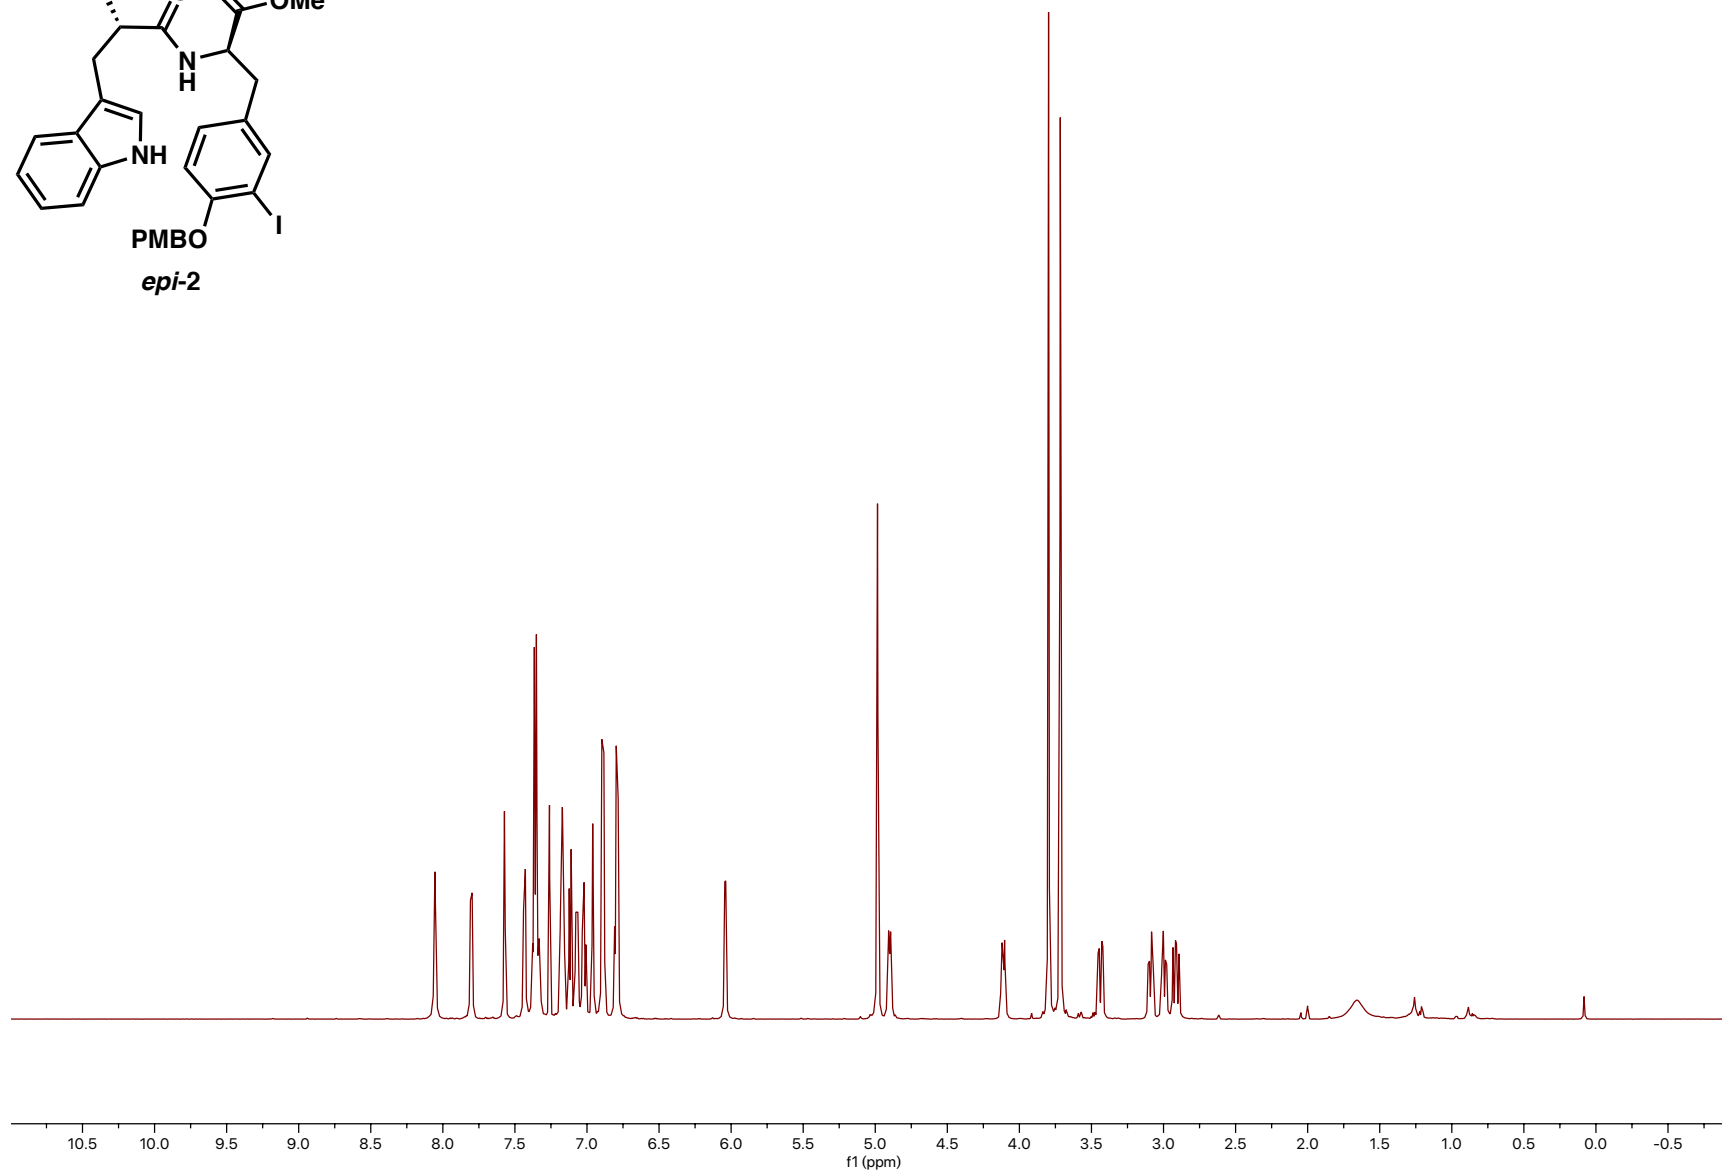

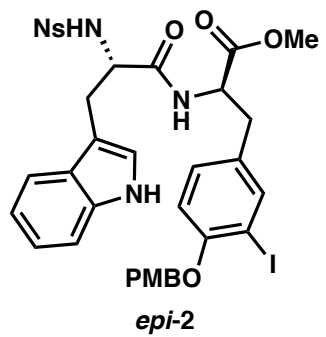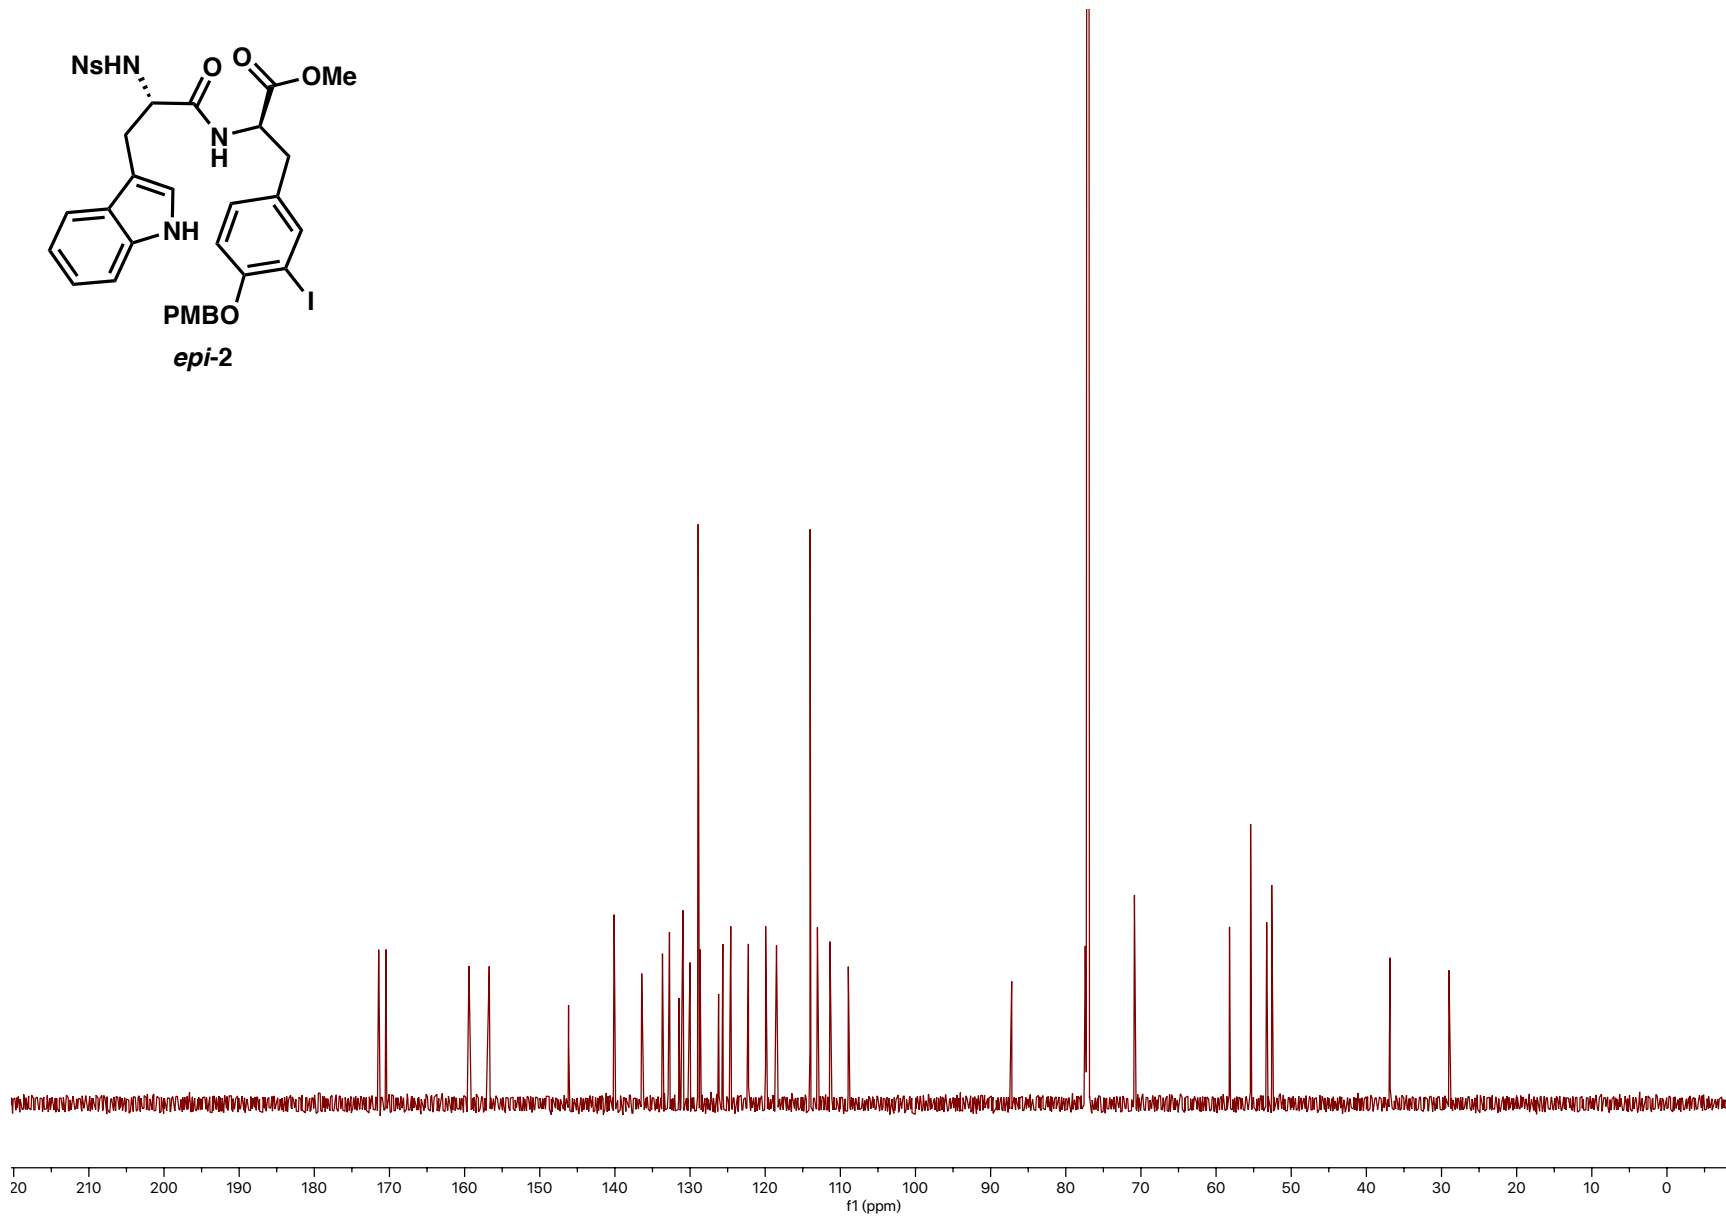



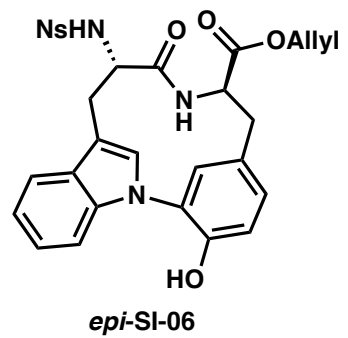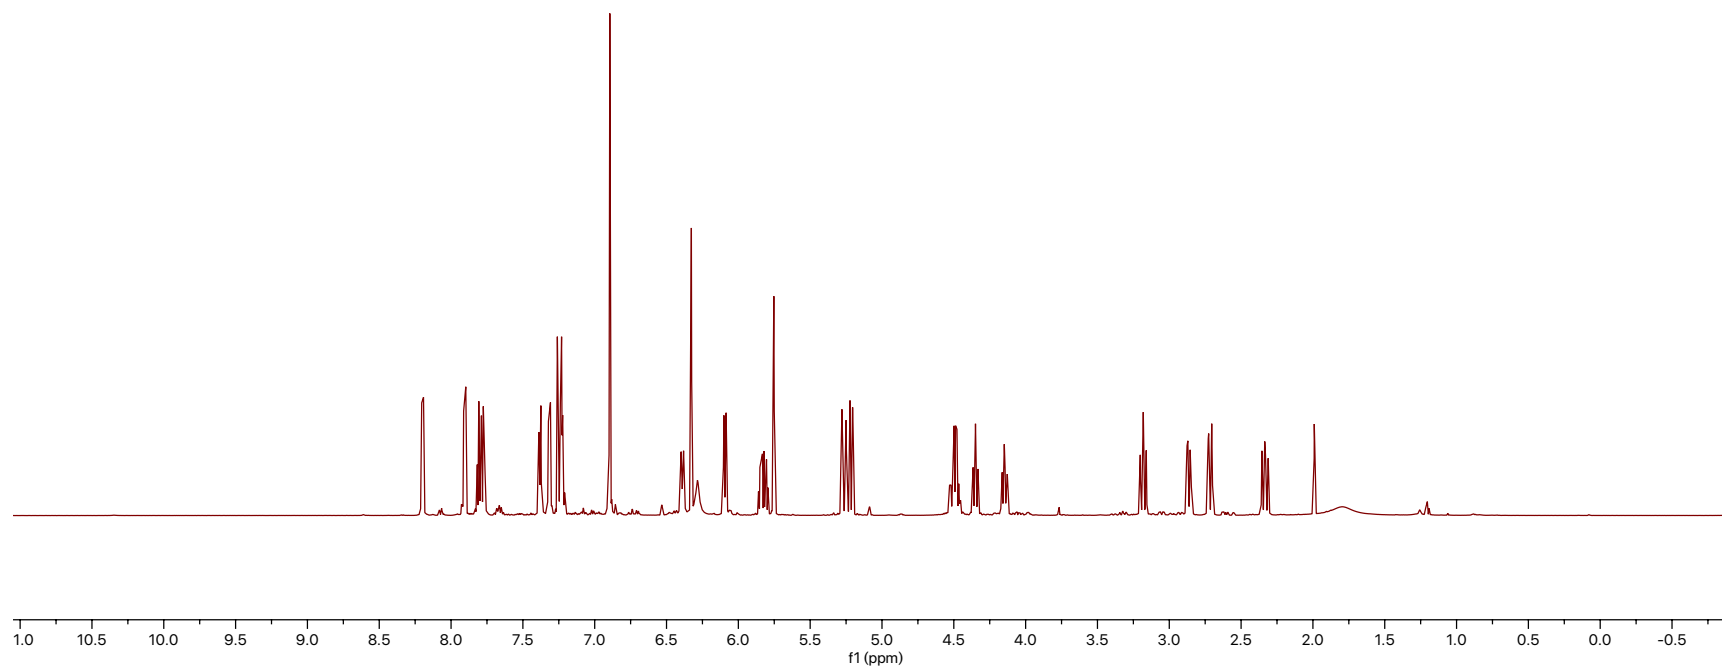

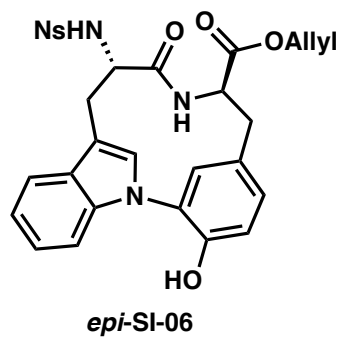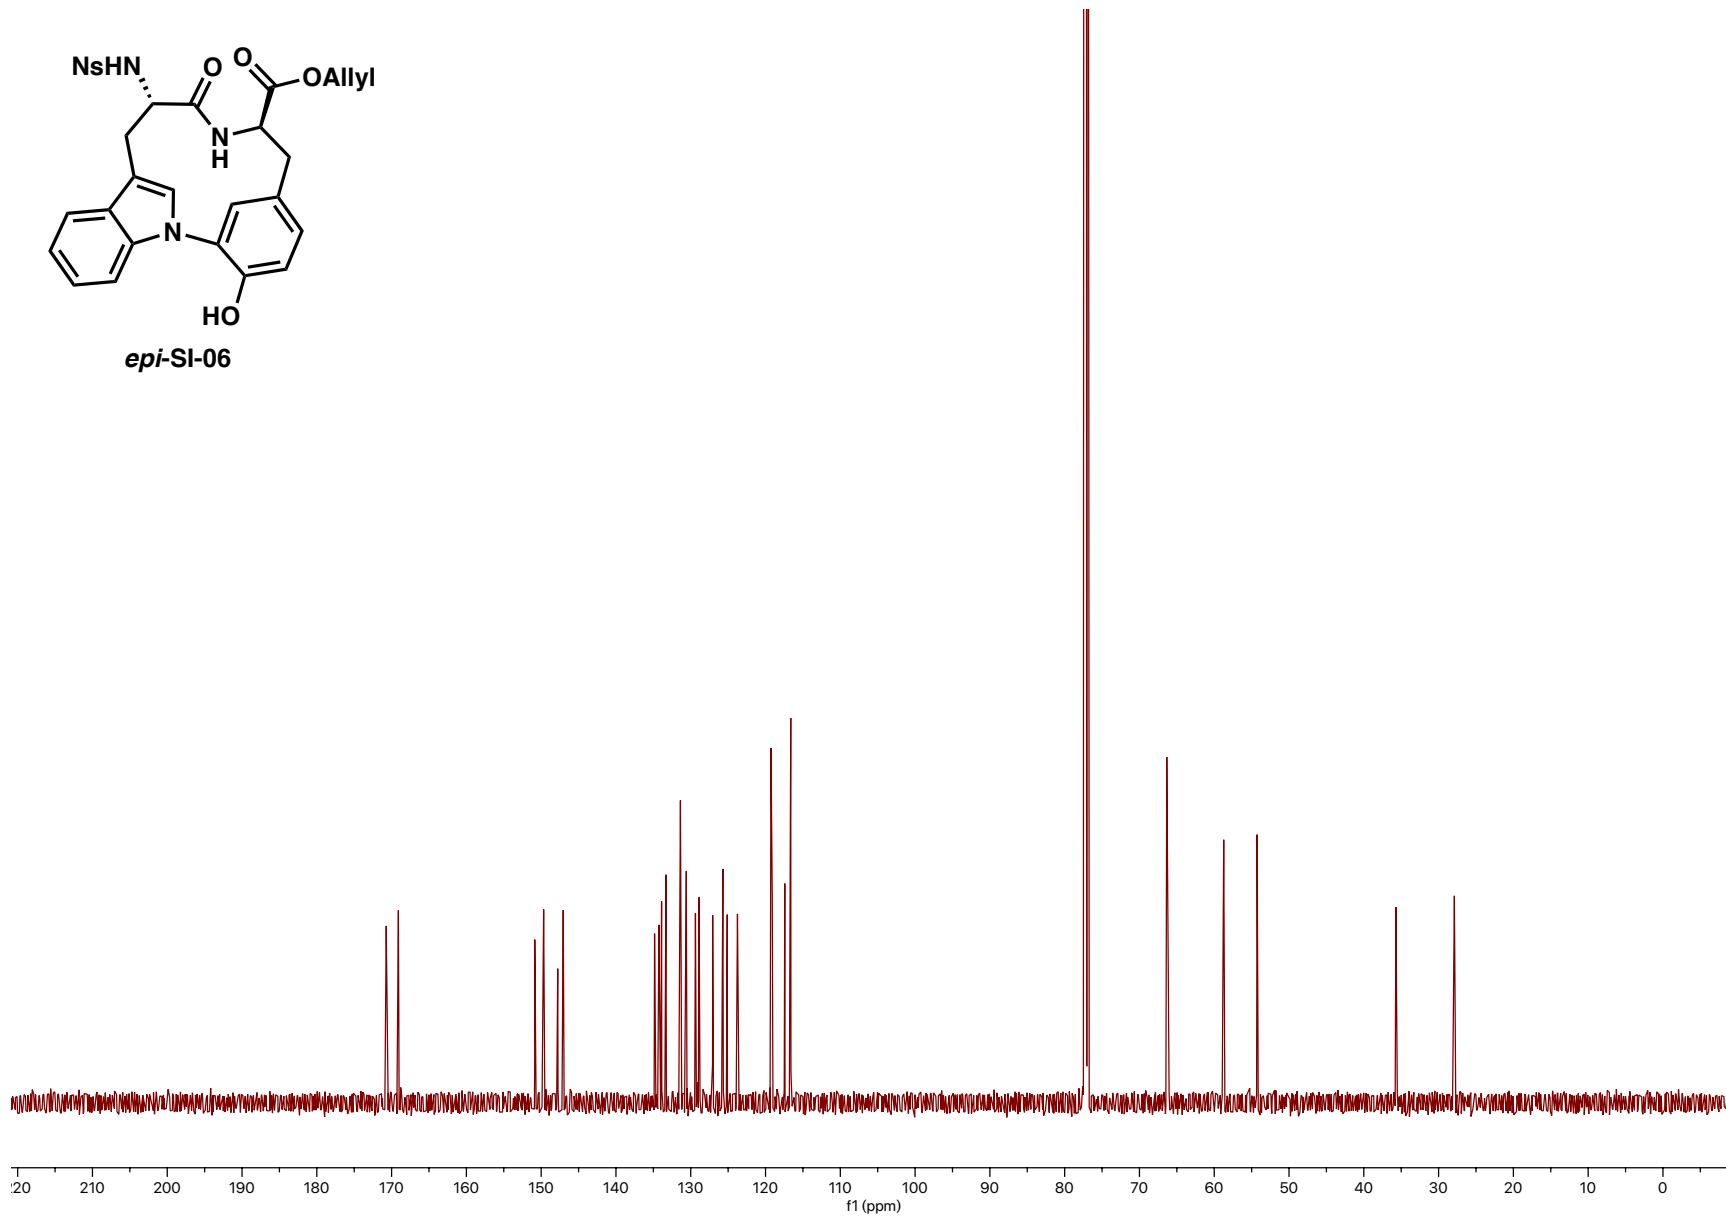

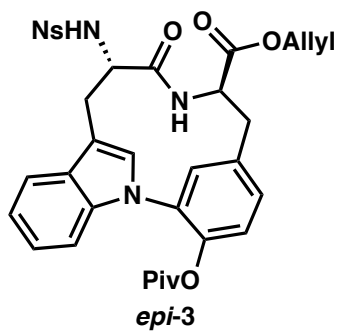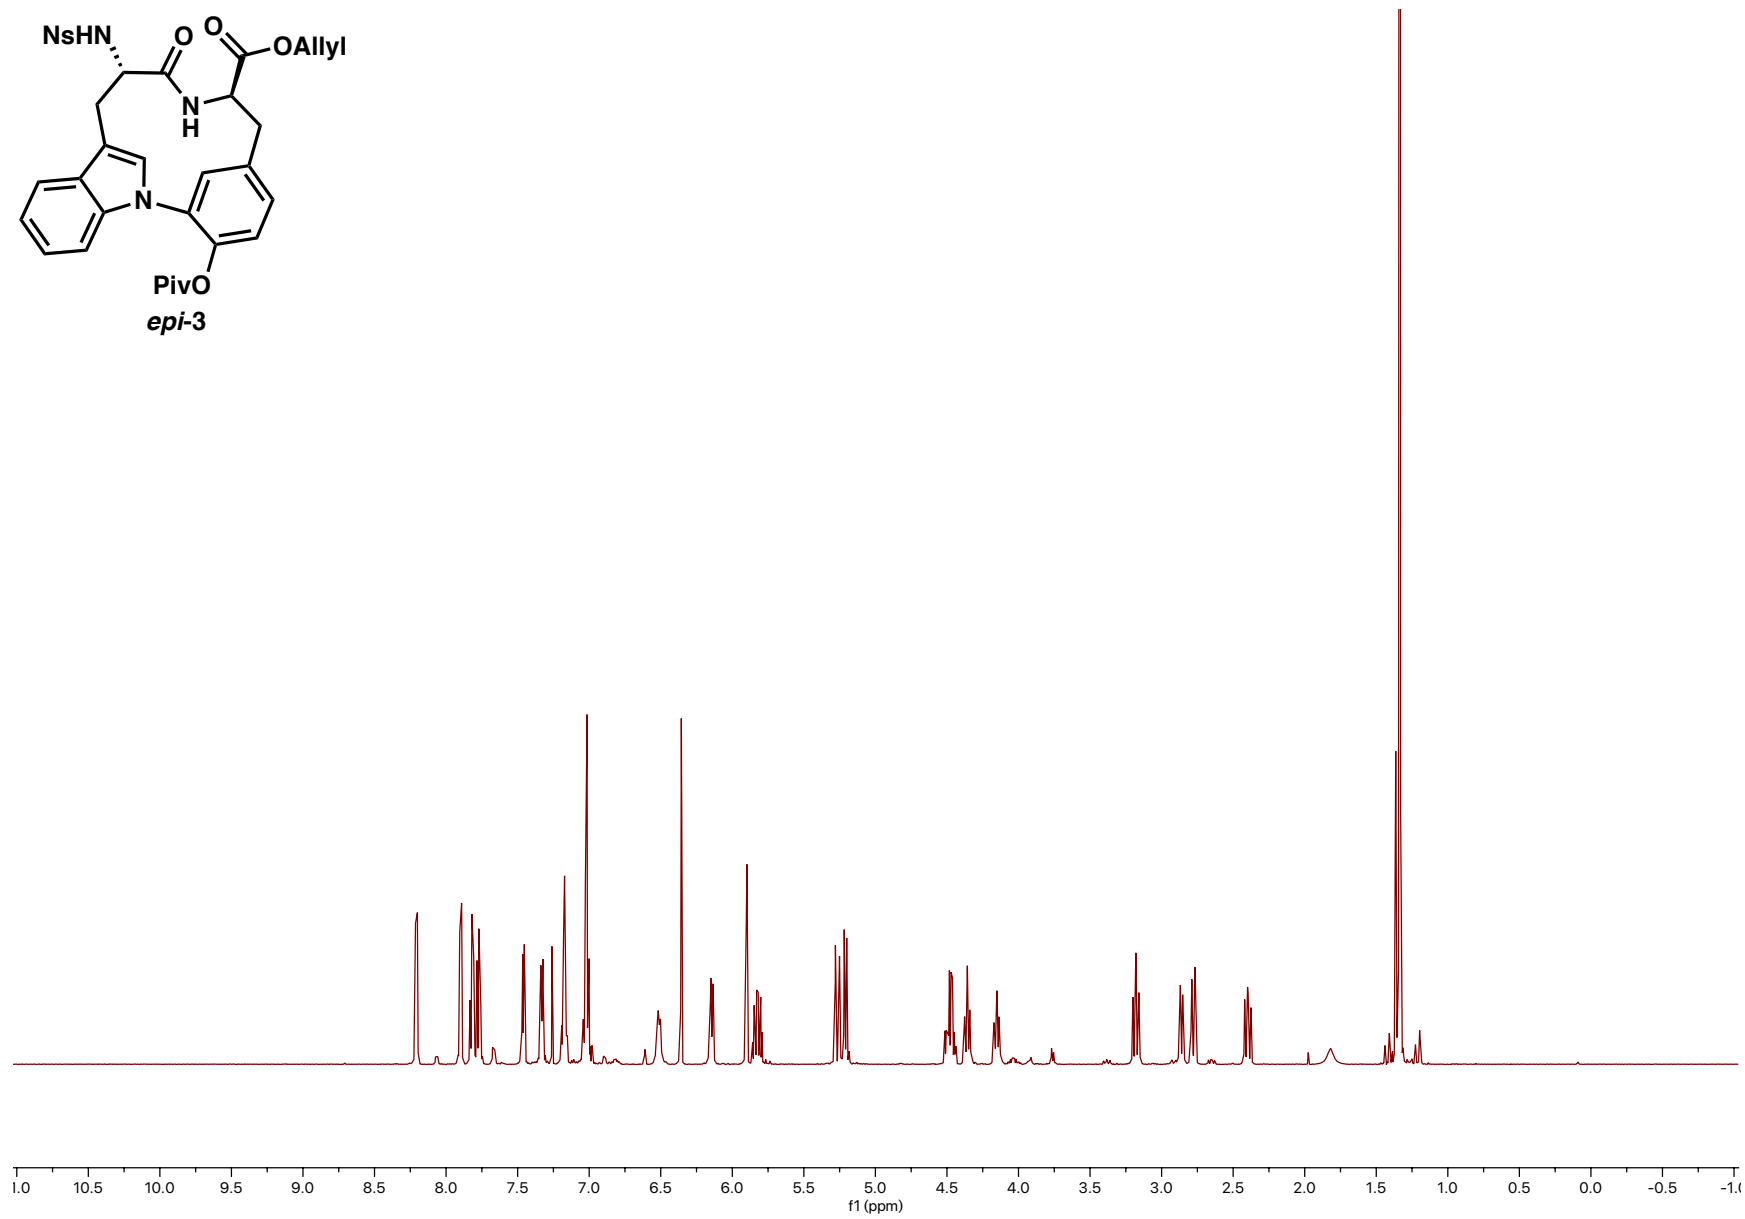

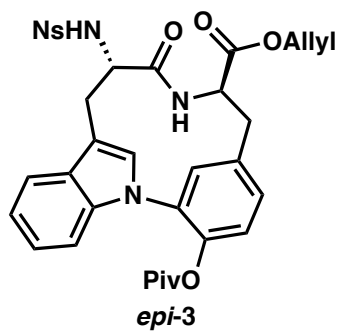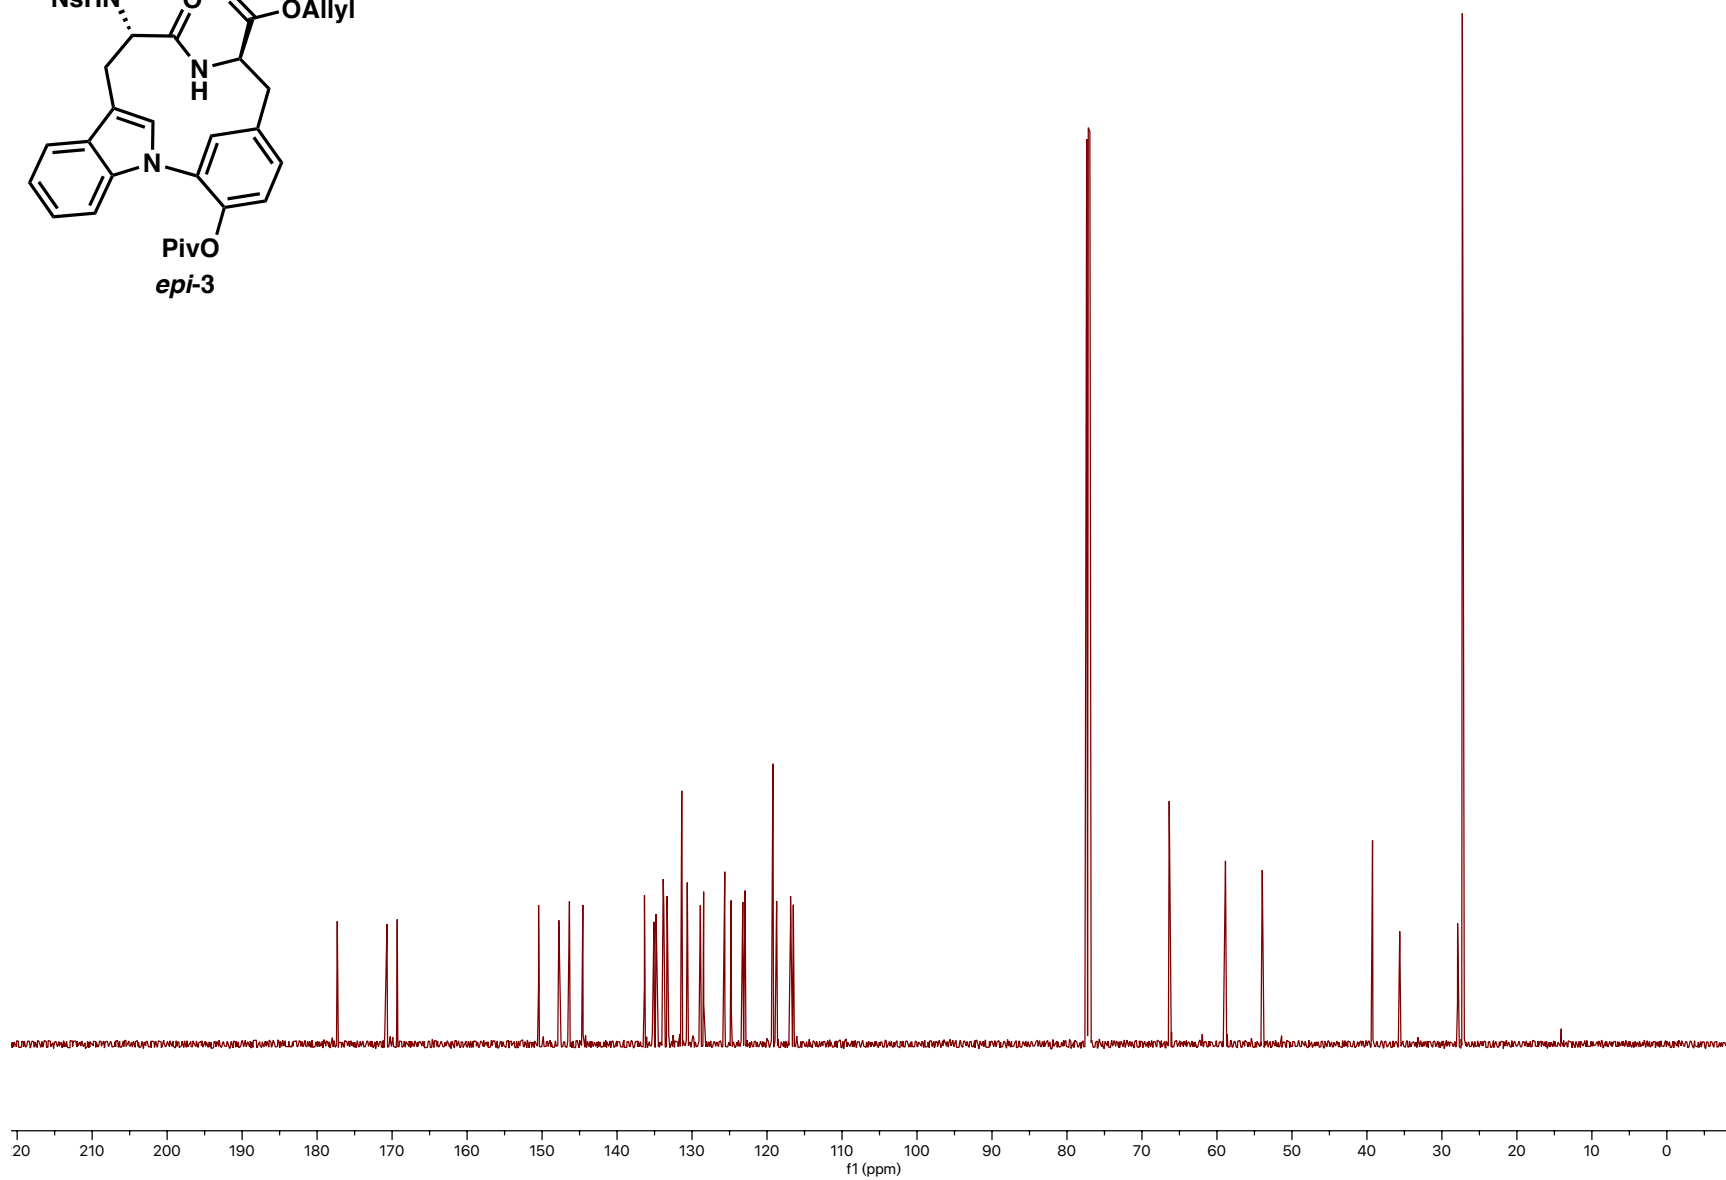

SHR-V-406a.1.fid

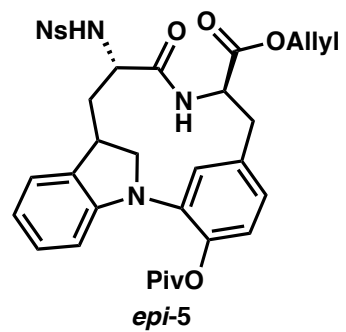

*Not assigned due to rotamerism*

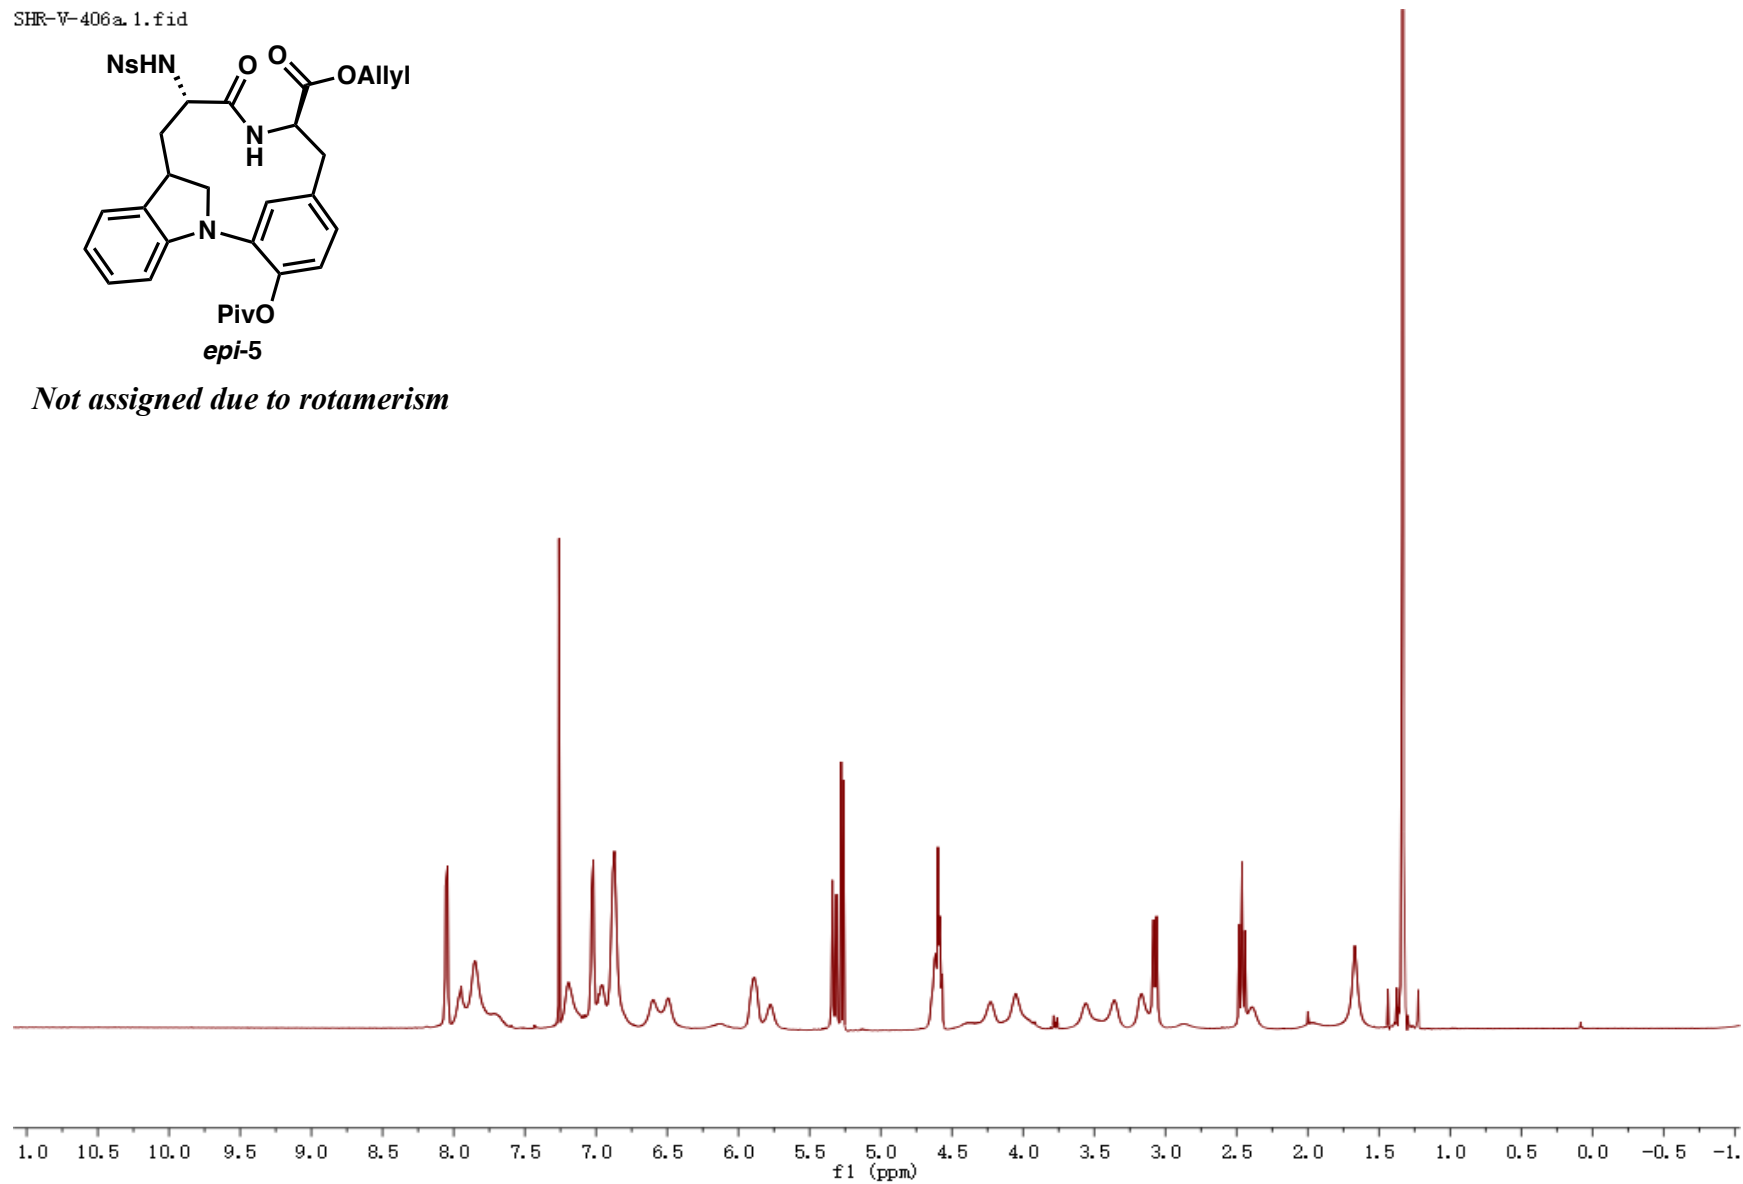

SHR-V-407a.1.fid

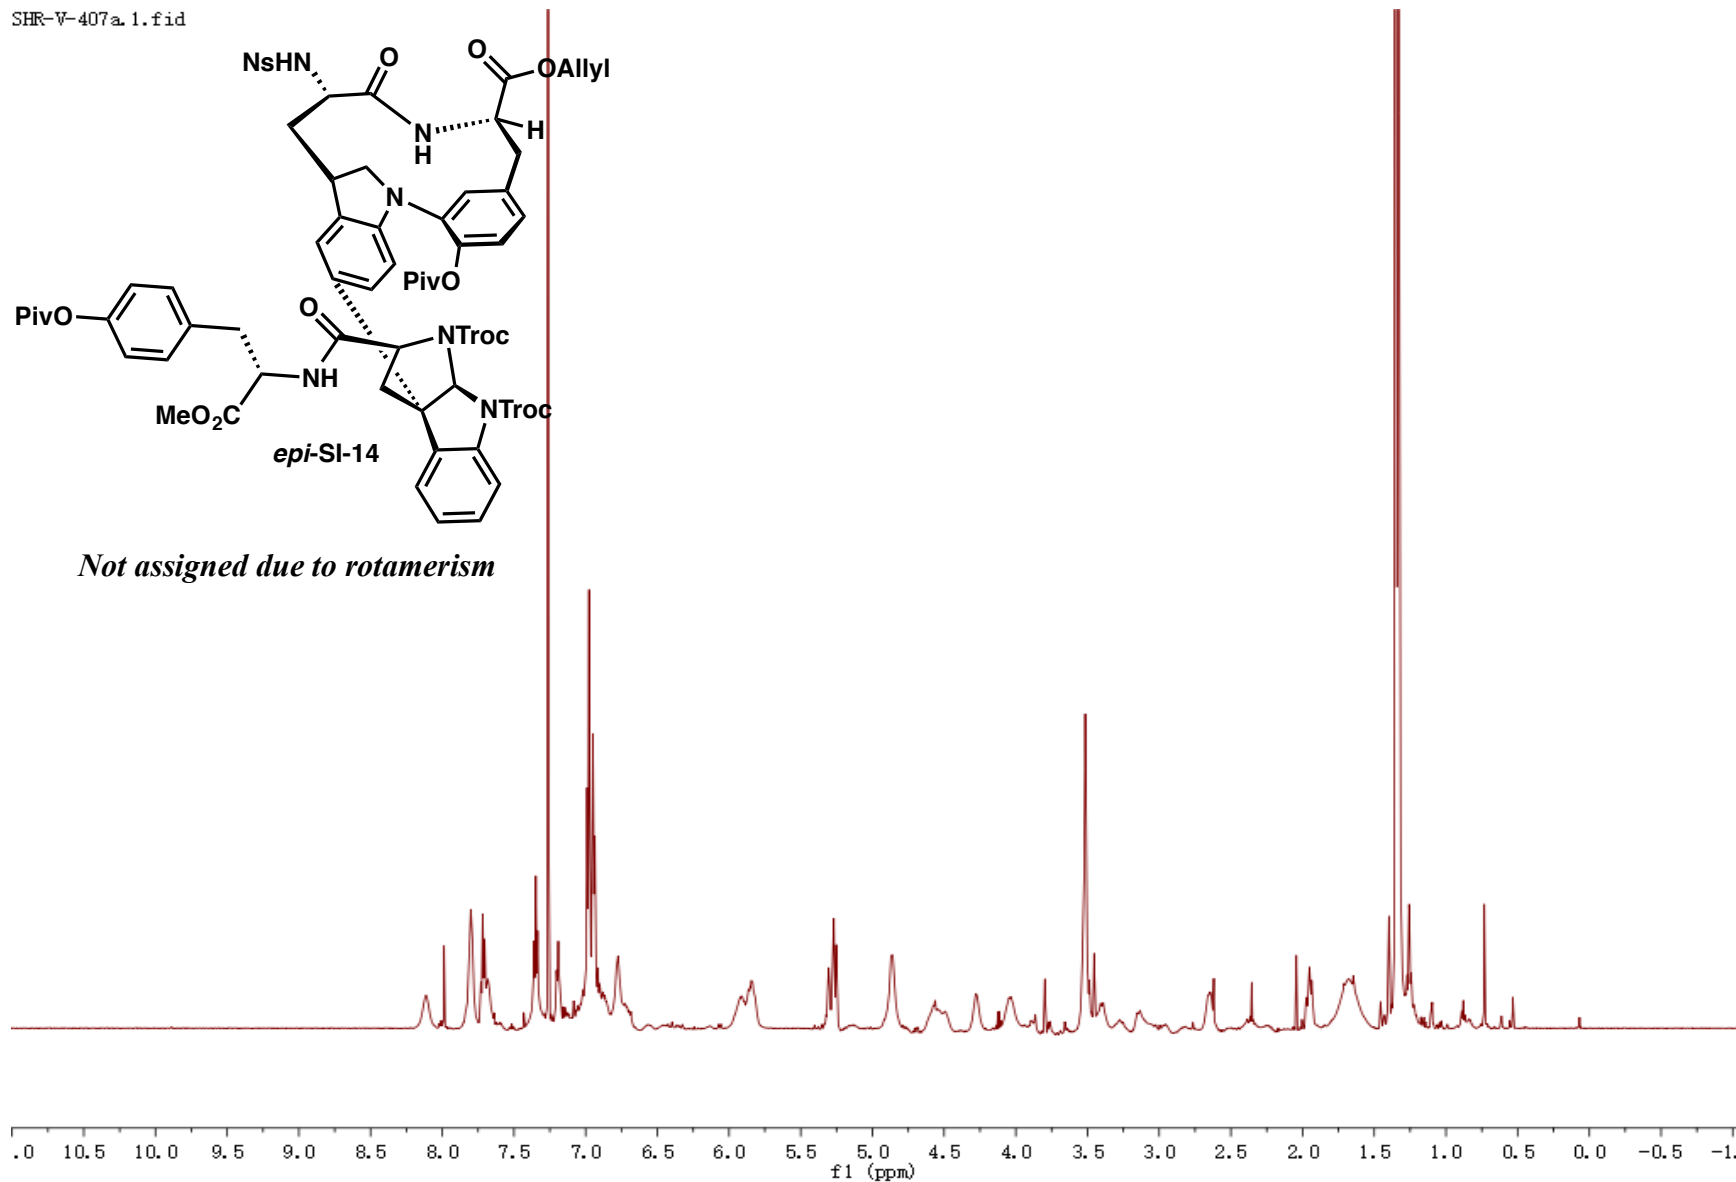

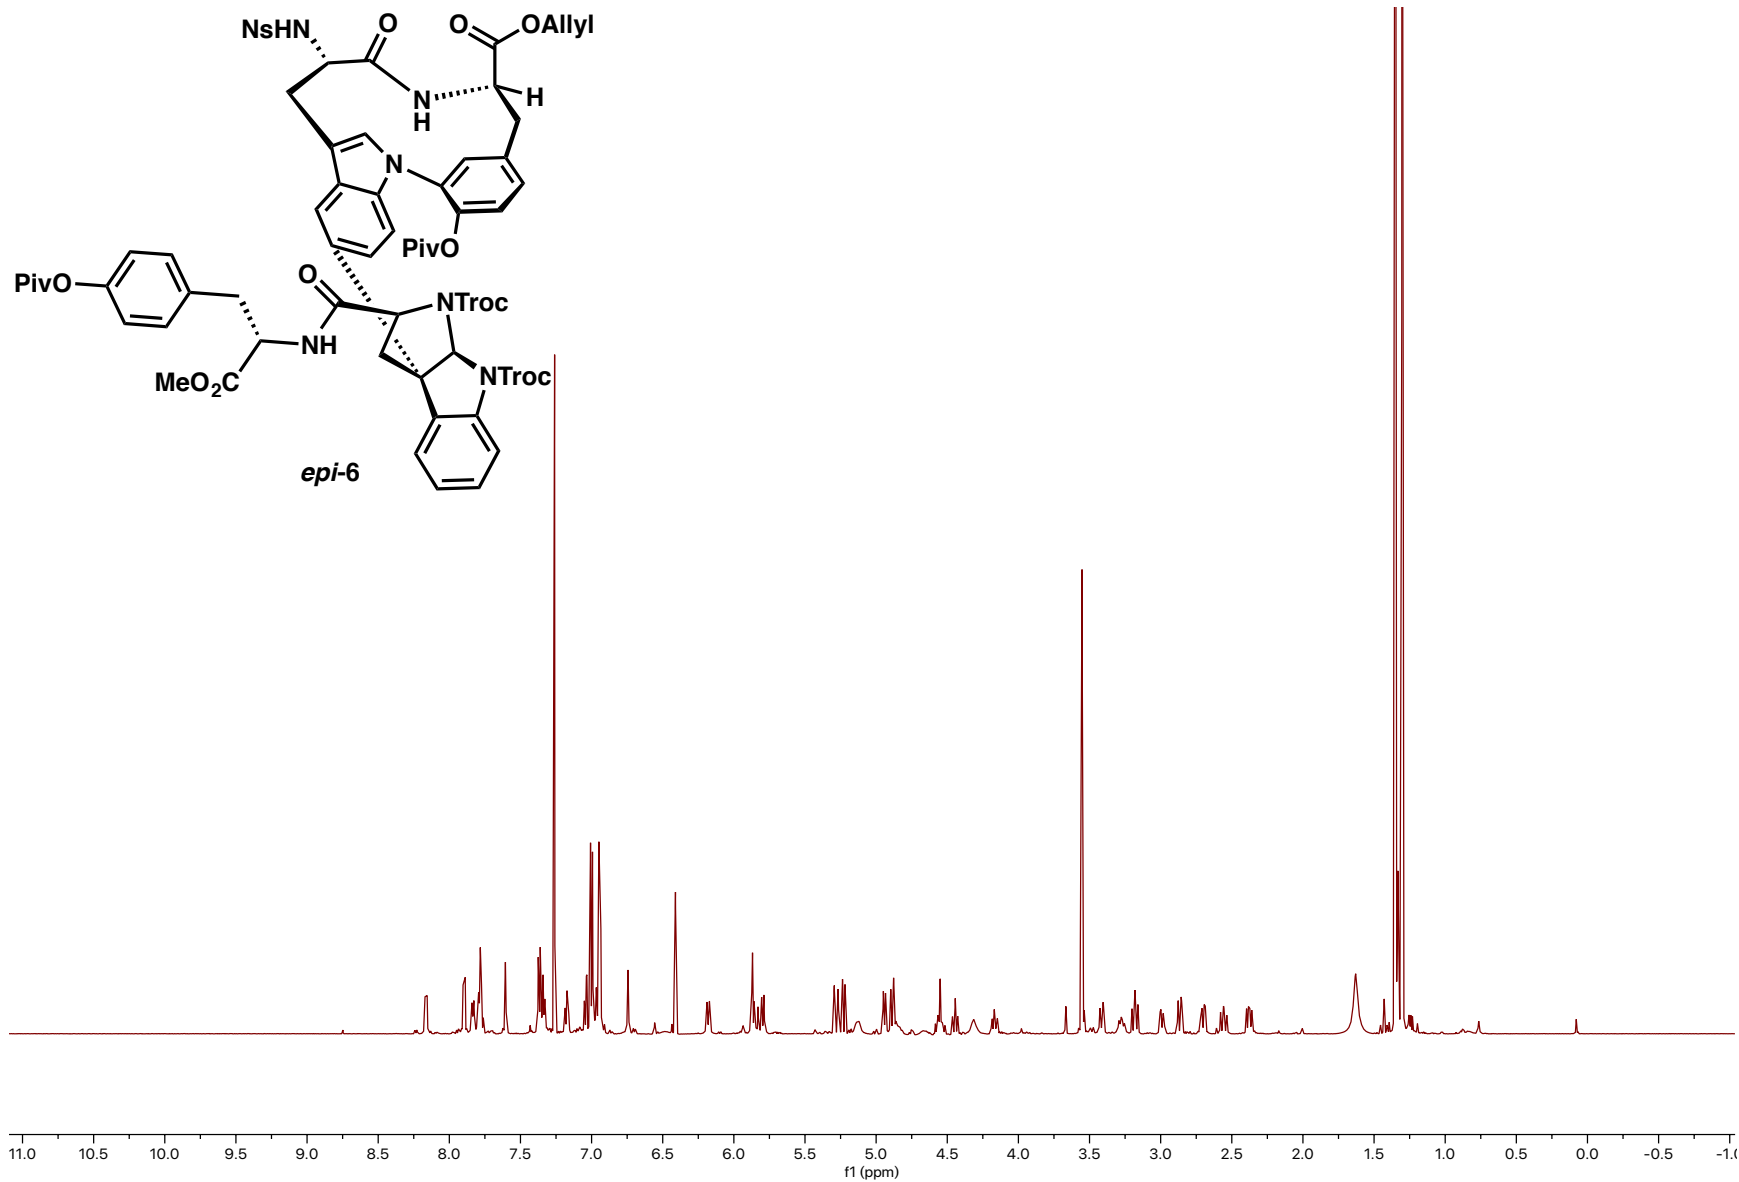

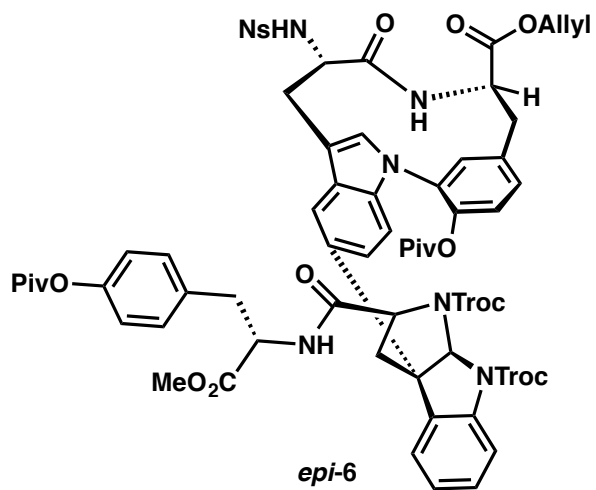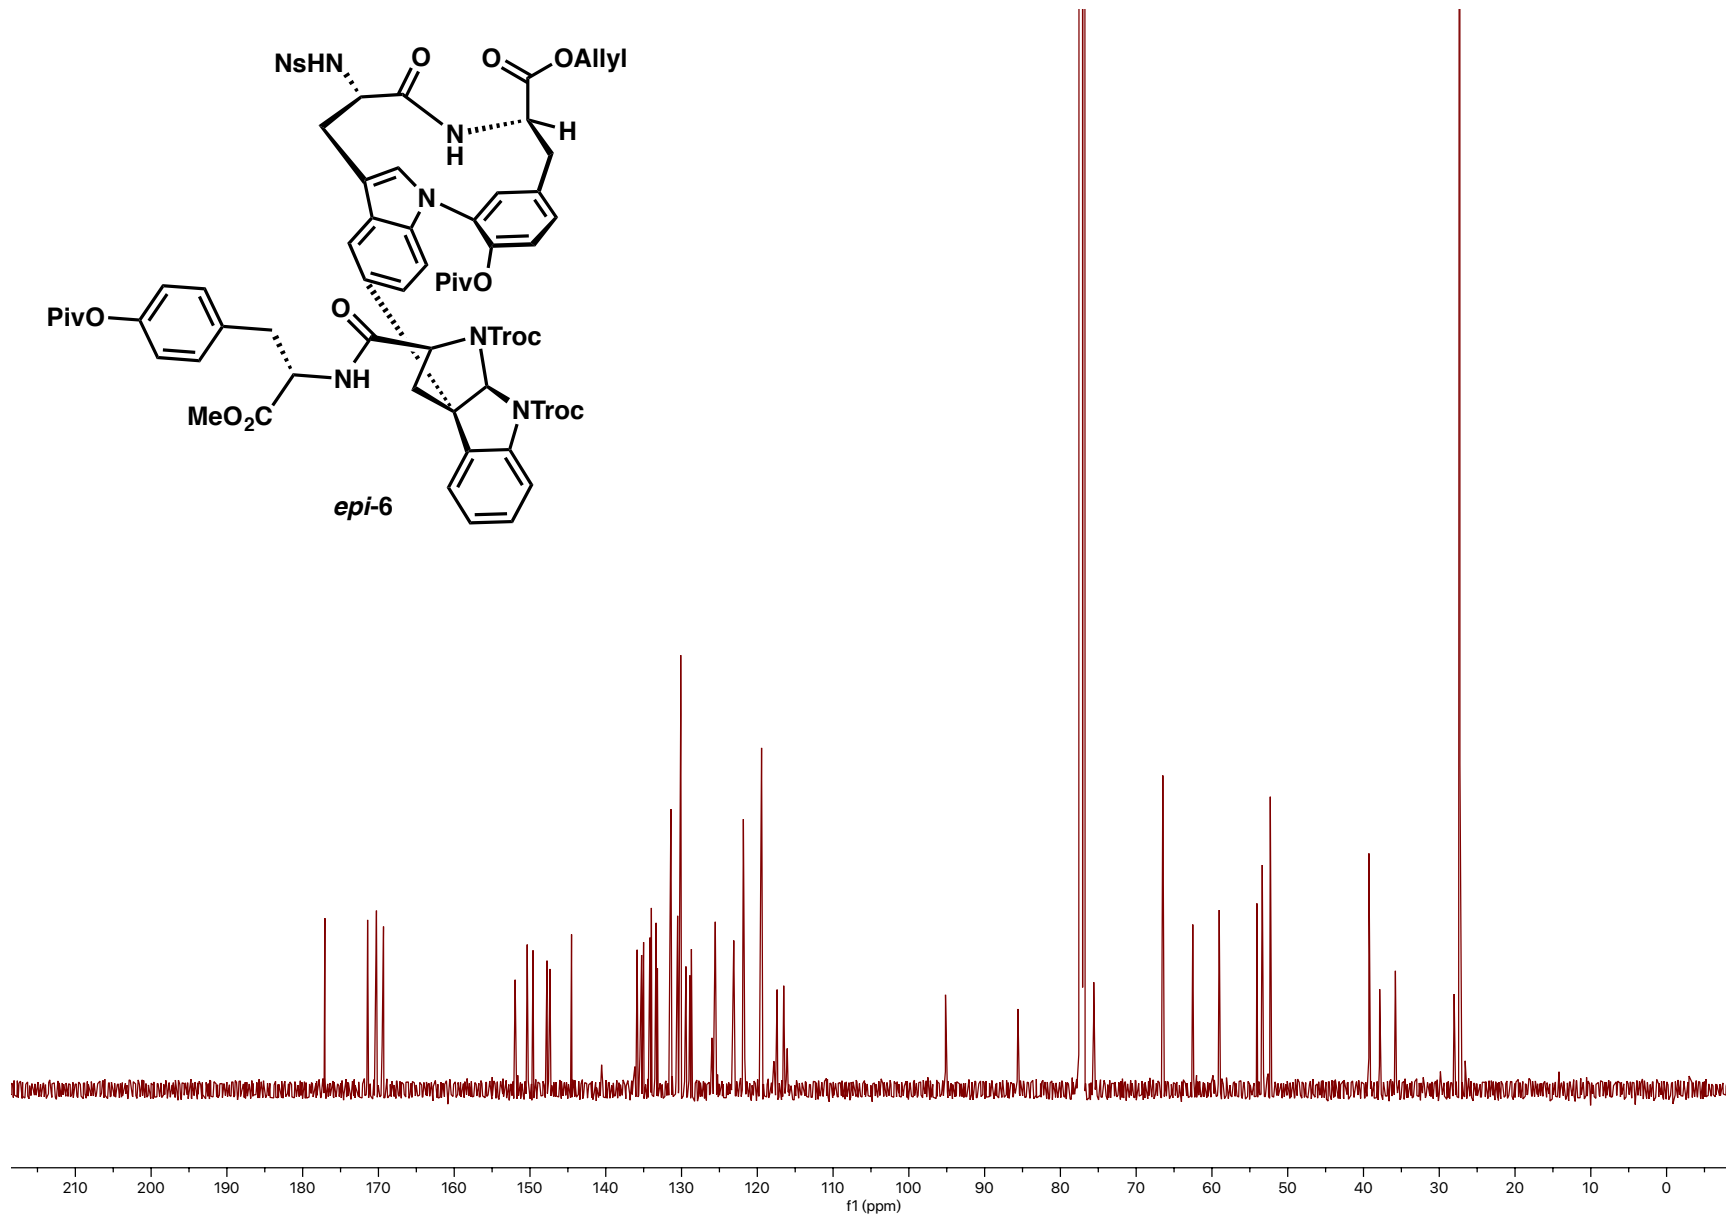



SHR-V-409a.1.fid

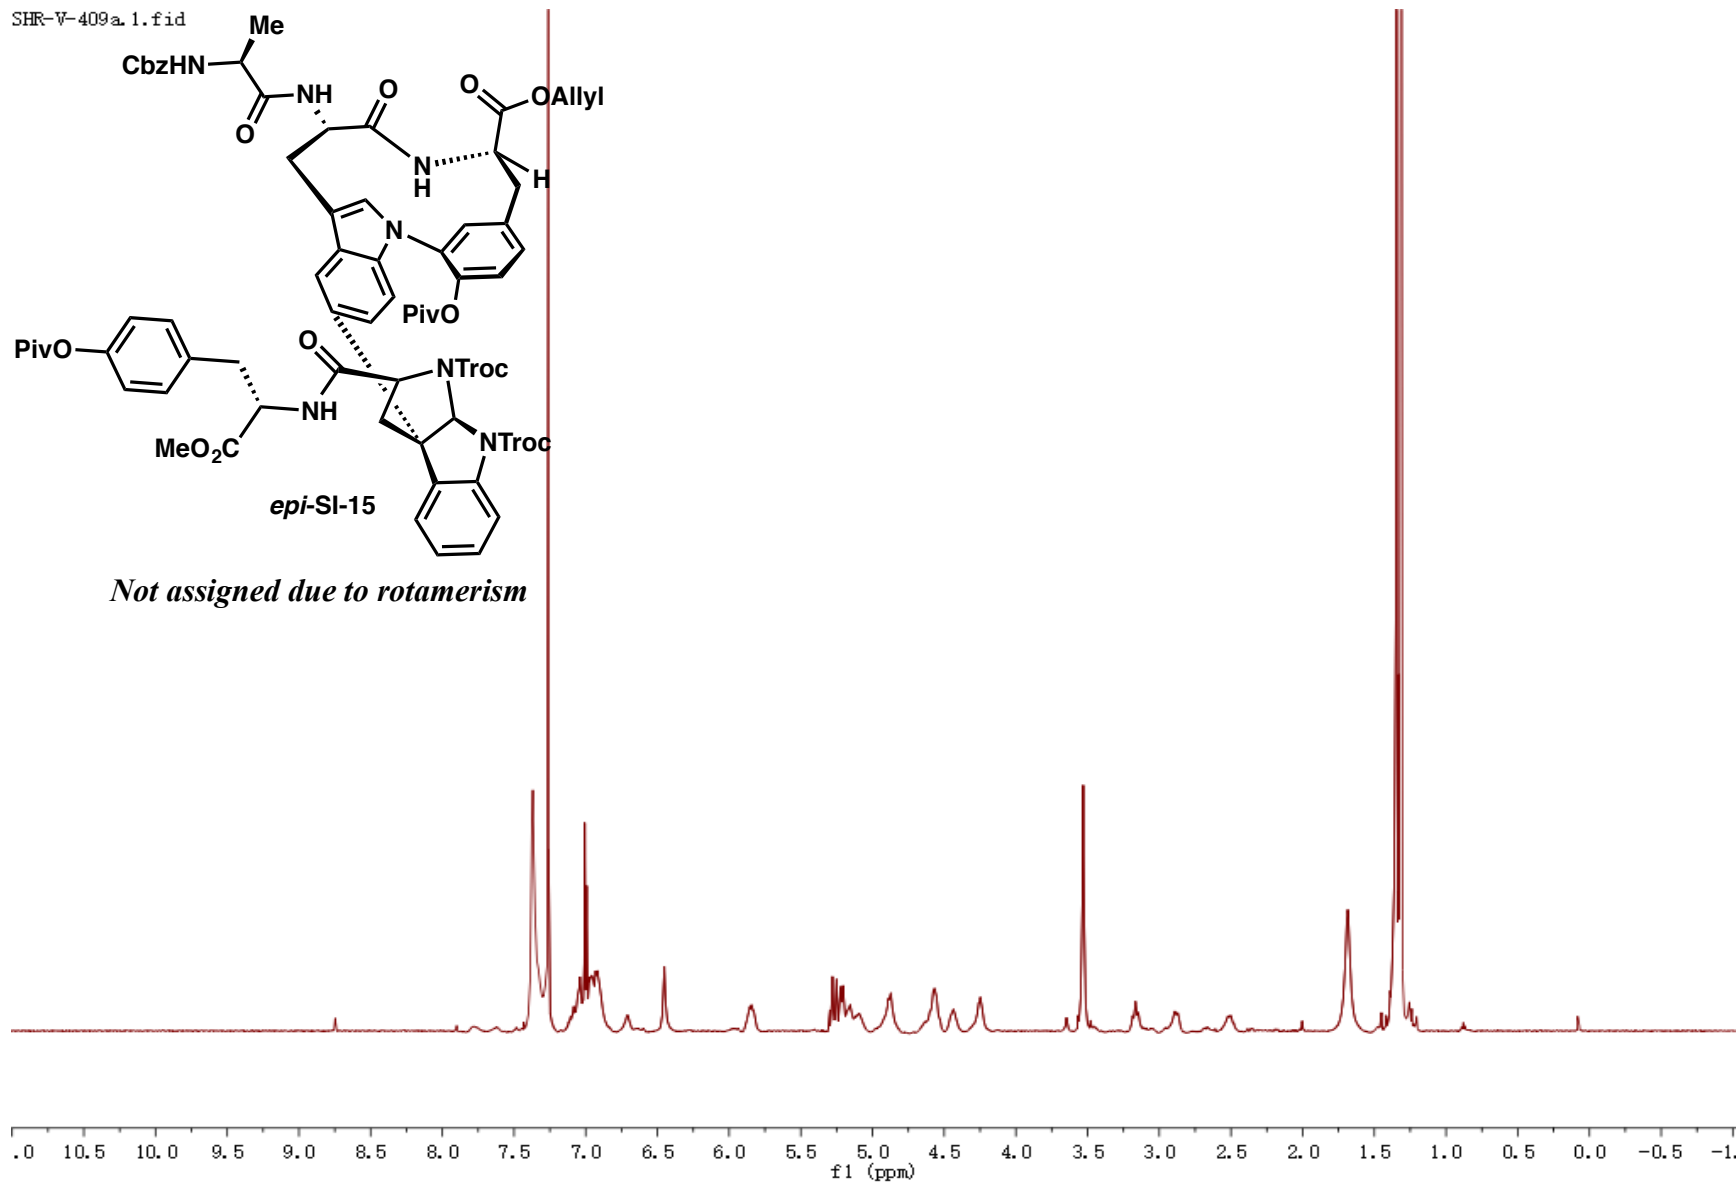

SHR-V-410a-retry. 1. fid

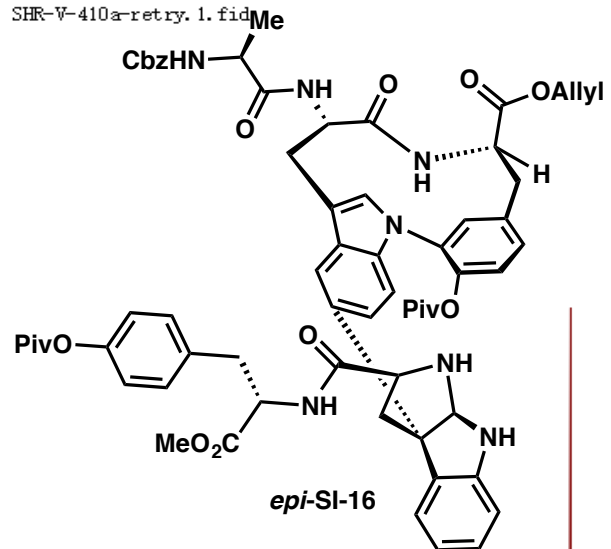

*Not assigned due to rotamerism*

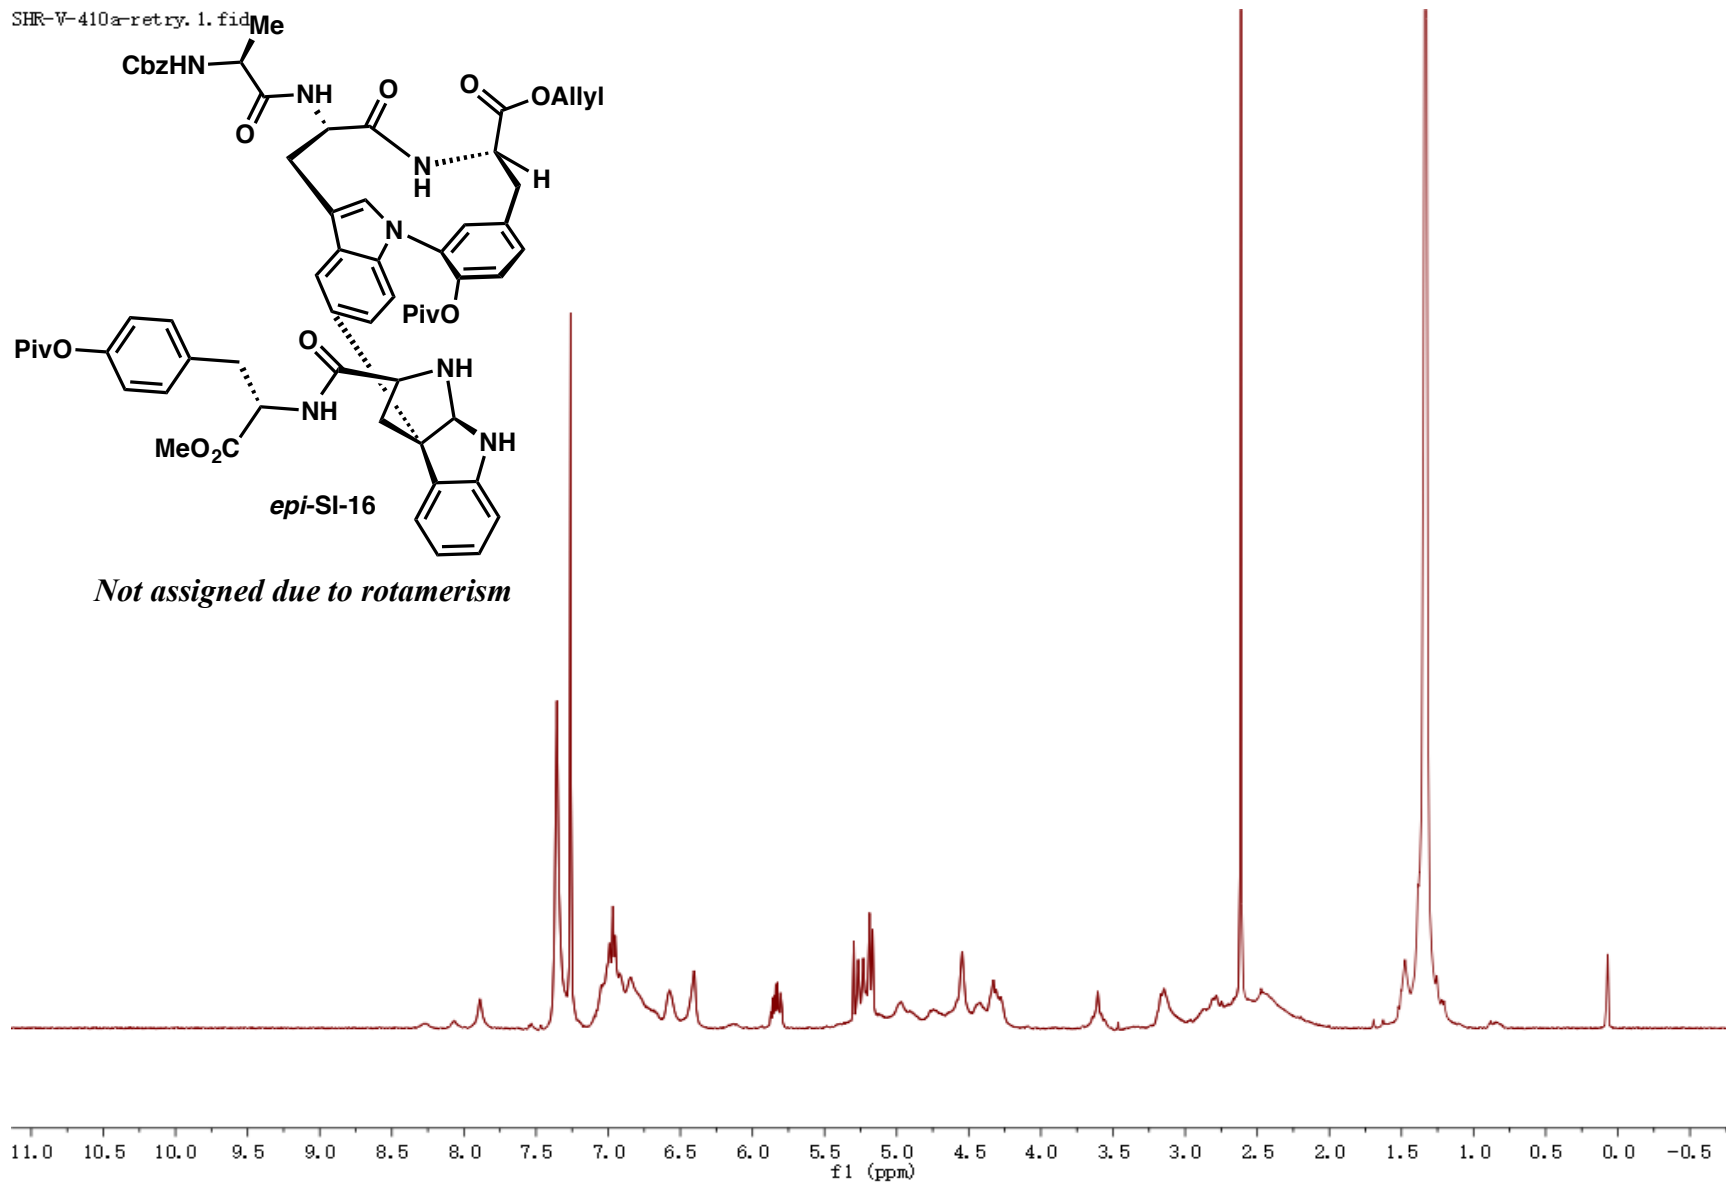

SHR-V-411a.1.fid

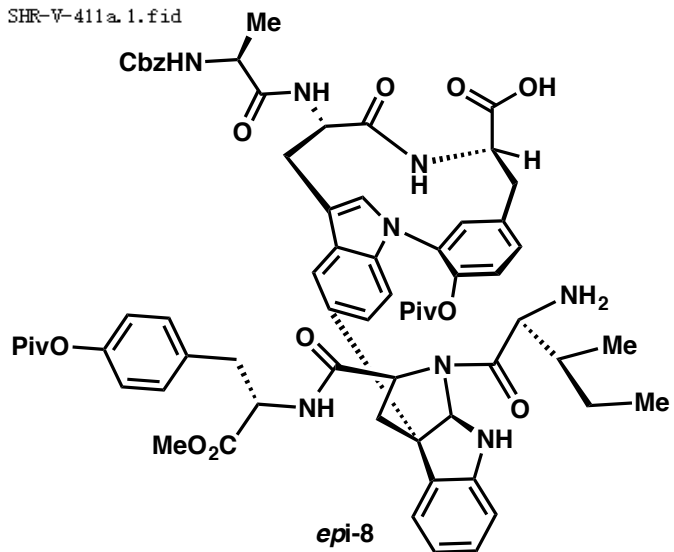

*Not assigned due to rotamerism*

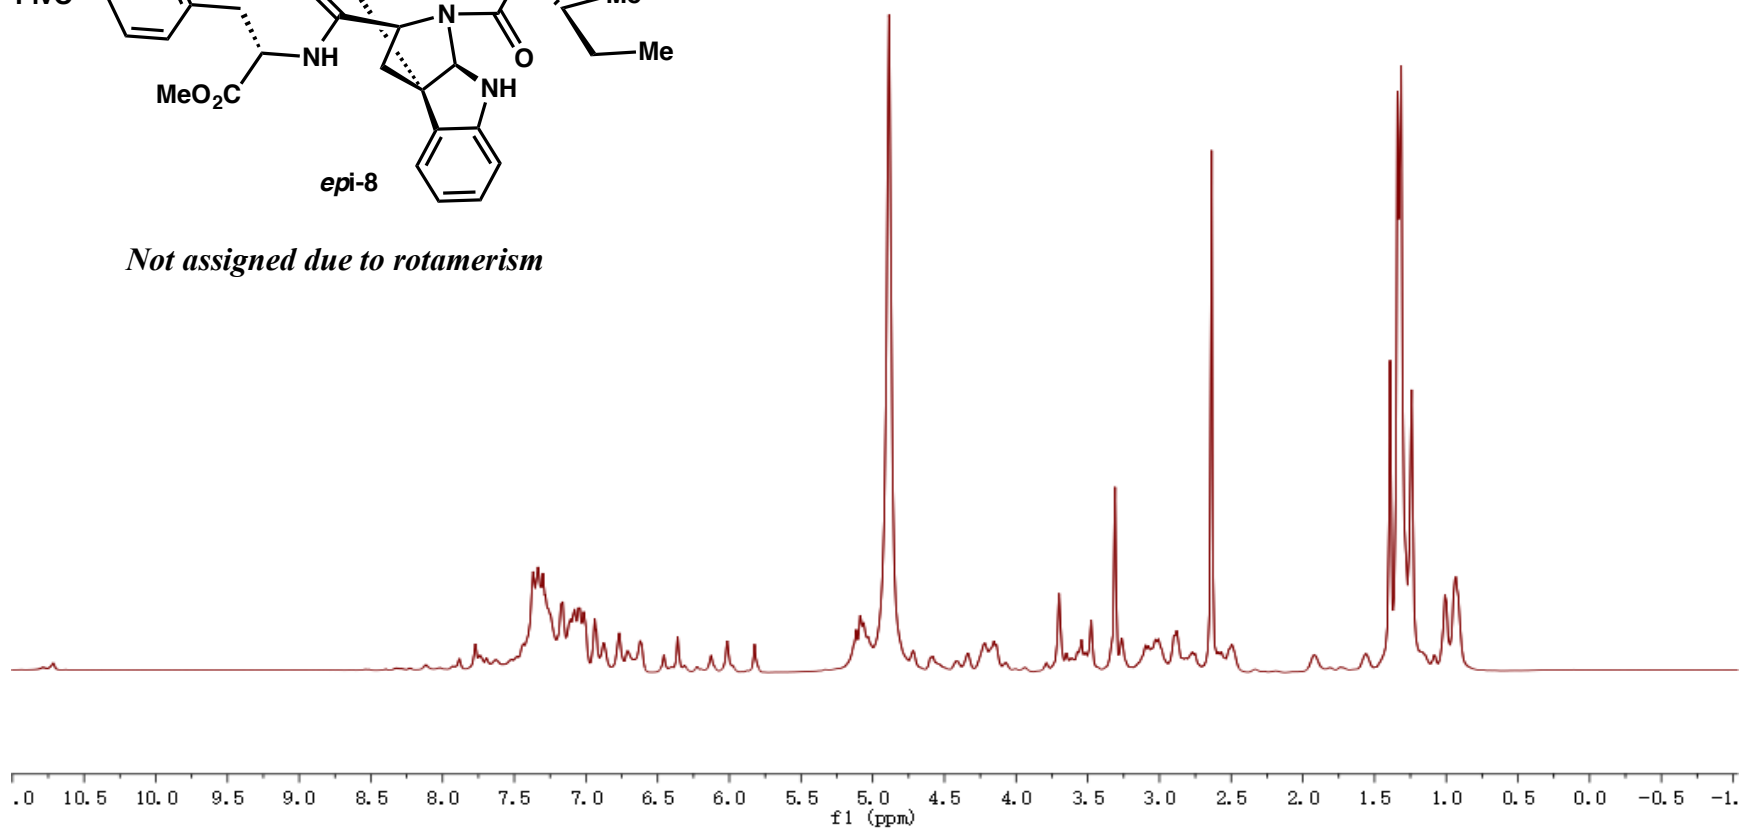

SF-V-427a. 3. fid

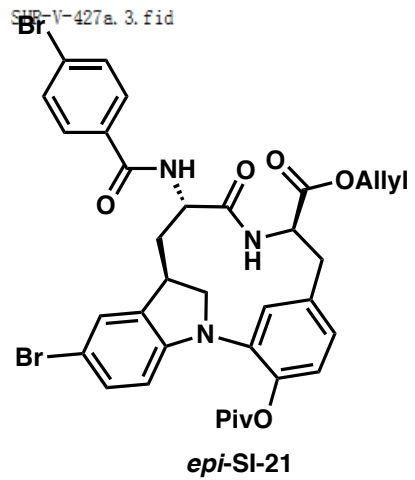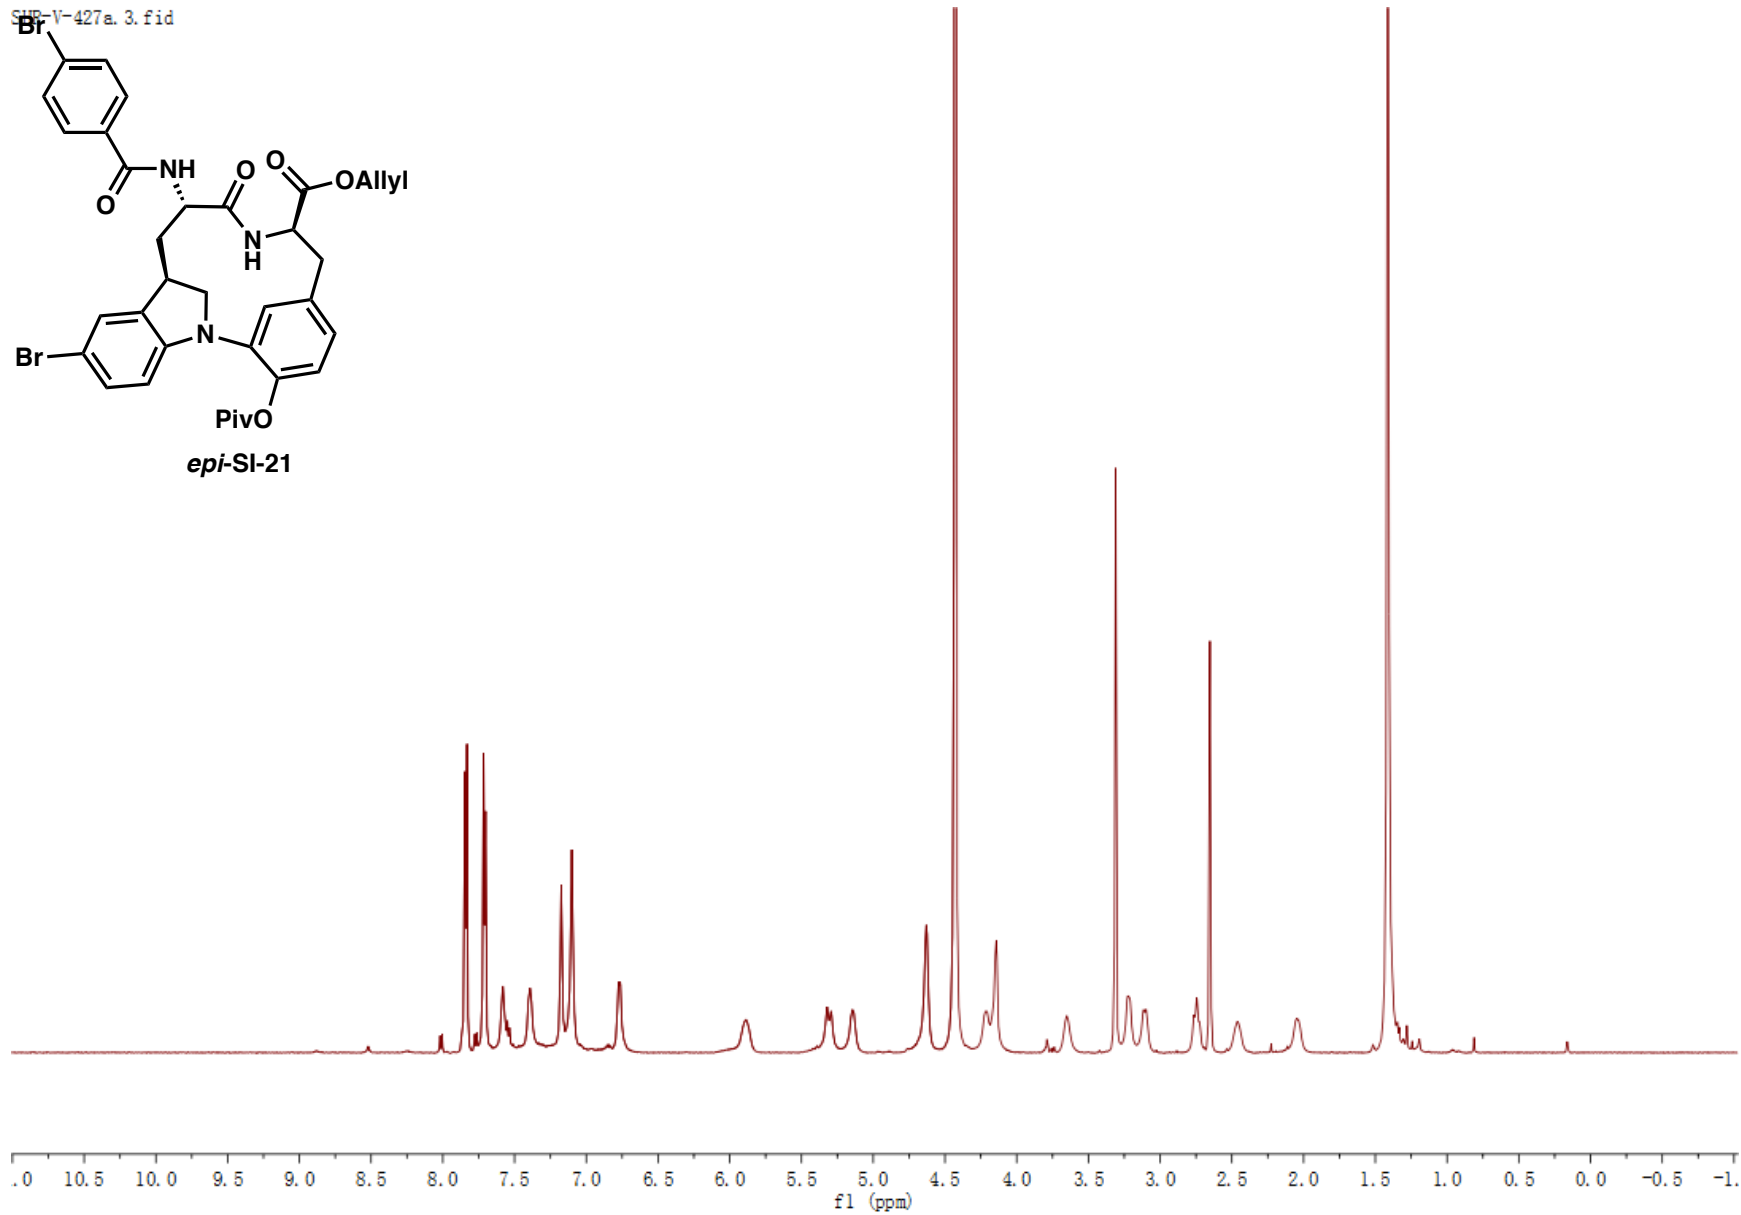

SHR-V-427a. 4. fid

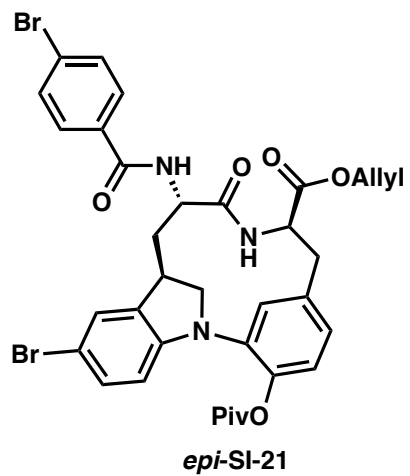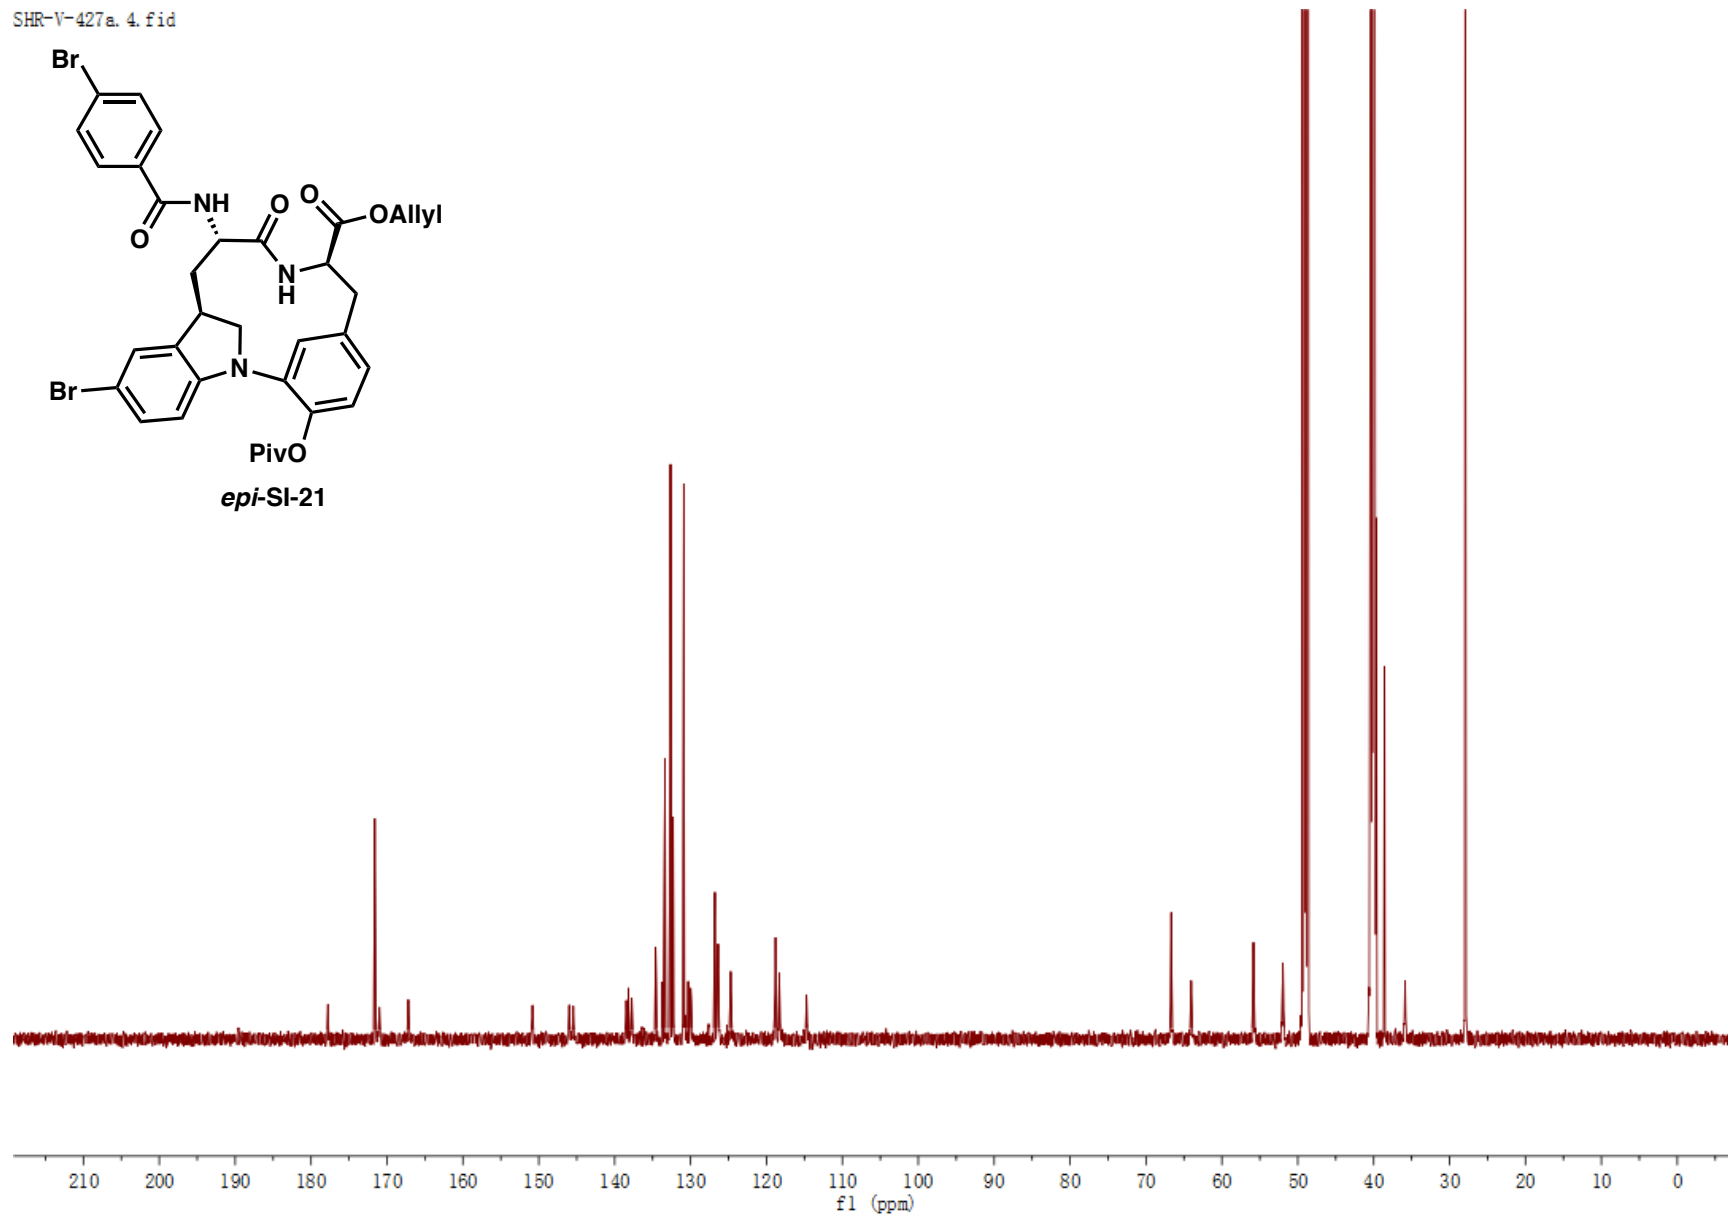

## DFT calculations and conclusions

In order to computationally explore proposed structures for the natural (**1a**) and synthetic *atrop* (**1b**) structures, we performed DFT calculations to predict  $^{13}\text{C}$  NMR spectra on variations of the tryptorubin A structure (Figure S12). We considered various stereoisomers of both the bridge-above and bridge-below shapes, as well as variations of the bridge below shape with *cis*-peptide bonds. To prepare the structures for DFT calculations, we first minimized the energy of the structures in Schrödinger's Maestro software suite and then performed a conformational search on the minimized structure, both using the MMFF force field.

**Figure S12:** Structural possibilities considered *via* DFT calculations.

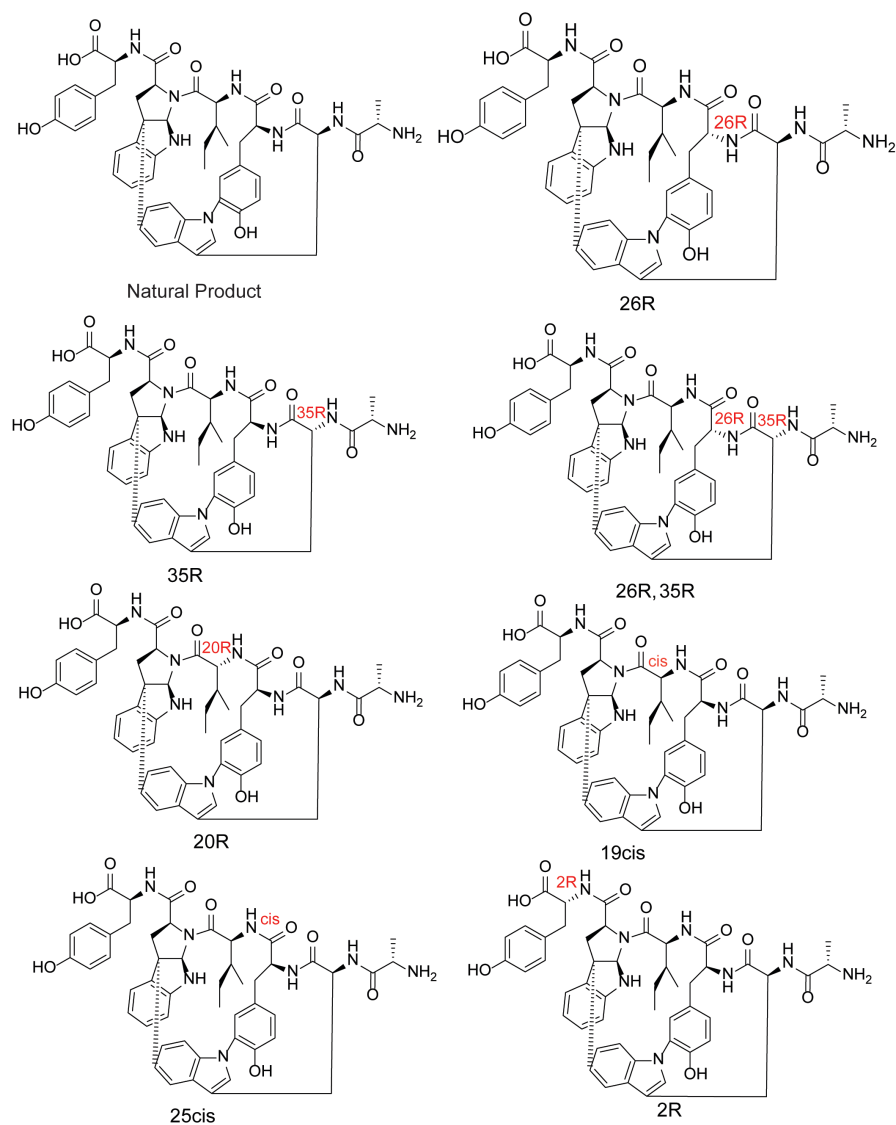

We selected the predicted minimum energy conformation structure for DFT calculations. All DFT calculations were performed with Gaussian 16<sup>35</sup> using the B3LYP function with a 6-31 (d,p) basis set and in gas phase. We first optimized the structure and checked for convergence with a frequency calculation. If the minimization had not converged, we repeated the optimization and frequency calculations until convergence. We then performed an NMR GIAO calculation on the minimized structure. We used the regression coefficients described in reference<sup>36</sup> to calculate the predicted chemical shifts for all carbons.

We then calculated the root mean squared error (RMSE) for the predicted and experimentally-observed chemical shifts for all structures (Figure S13). We selected the several closest matches between the calculated and experimental structures for follow up with alternate low-energy conformers. The two closest matches to the natural product in both DMSO and MeOD were the proposed natural product structure (bridge-above shape, **1a**) and the bridge-below structure with a cis peptide bond at N19-C19 (see Figure S11, **19cis**), so we selected these structures for additional analysis. For the synthetic product **1b**, the closest two matches were the bridge-below structure with stereochemical inversions at C26 and C35 and the bridge below structure with a cis peptide bond at N25-C25.

**Figure S13:** RMSE's for predicted spectrum for one conformer without reassignment for A) natural product **1a** in DMSO, B) natural product **1a** in MeOD, and C) synthetic product **1b** in MeOD.

---

<sup>35</sup> Gaussian 16, Revision A.03, Frisch, M. J.; Trucks, G. W.; Schlegel, H. B.; Scuseria, G. E.; Robb, M. A.; Cheeseman, J. R.; Scalmani, G.; Barone, V.; Petersson, G. A.; Nakatsuji, H.; Li, X.; Caricato, M.; Marenich, A. V.; Bloino, J.; Janesko, B. G.; Gomperts, R.; Mennucci, B.; Hratchian, H. P.; Ortiz, J. V.; Izmaylov, A. F.; Sonnenberg, J. L.; Williams-Young, D.; Ding, F.; Lipparini, F.; Egidi, F.; Goings, J.; Peng, B.; Petrone, A.; Henderson, T.; Ranasinghe, D.; Zakrzewski, V. G.; Gao, J.; Rega, N.; Zheng, G.; Liang, W.; Hada, M.; Ehara, M.; Toyota, K.; Fukuda, R.; Hasegawa, J.; Ishida, M.; Nakajima, T.; Honda, Y.; Kitao, O.; Nakai, H.; Vreven, T.; Throssell, K.; Montgomery, J. A., Jr.; Peralta, J. E.; Ogliaro, F.; Bearpark, M. J.; Heyd, J. J.; Brothers, E. N.; Kudin, K. N.; Staroverov, V. N.; Keith, T. A.; Kobayashi, R.; Normand, J.; Raghavachari, K.; Rendell, A. P.; Burant, J. C.; Iyengar, S. S.; Tomasi, J.; Cossi, M.; Millam, J. M.; Klene, M.; Adamo, C.; Cammi, R.; Ochterski, J. W.; Martin, R. L.; Morokuma, K.; Farkas, O.; Foresman, J. B.; Fox, D. J. Gaussian, Inc., Wallingford CT, 2016.

<sup>36</sup> I. A. Konstantinov, L. J. Broadbelt, Regression formulas for density functional theory calculated 1H and 13C NMR chemical shifts in toluene-d8. *J Phys Chem A* **115**, 12364-12372 (2011).

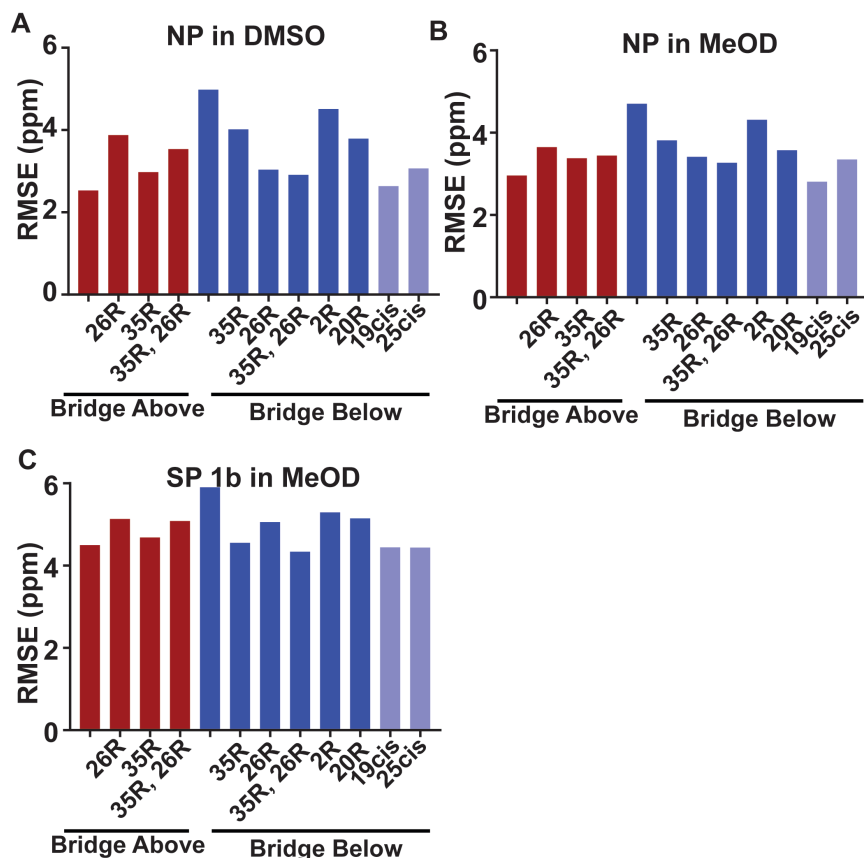

In this manner we identified these three structures — the proposed bridge-above structure **1a**, the bridge-above isomer epimerized at C26 (**26R**), and the bridge-above topology with a *cis* peptide bond at N19-C19 (**19cis**) for further analysis. For each structure chosen for additional analysis, we performed the DFT calculations as described above for an additional 4 low energy conformers. We averaged the 5 predicted spectra for each structure using a Boltzmann-weighted average and then calculated RMSE (Figure S14). The proposed natural product structure was the closest match to the natural product spectrum taken in DMSO (RMSE = 2.4 ppm) while the bridge-above, *cis* N19-C19 was the closest match to that natural product spectrum taken in MeOD. We then compared the  $^1\text{H}$ - $^1\text{H}$  distances for ROESY NMR data<sup>12</sup> (Table S9, Figure S15) and found that only the proposed natural product structure is consistent with the ROESY data with all  $^1\text{H}$ - $^1\text{H}$  distances < 5 Å. We therefore concluded that the natural product structure was correctly assigned as the bridge-above shape assignment (**1a**).

For the synthetic product **1b**, the bridge-above structure (**1a**), the bridge-above atropisomer epimerized at C26 (**26R**), the bridge-above atropisomer with 26R and 35R (**26R,35R**), and the bridge-above atropisomer with a *cis* peptide bond between N19-C19 (**cis19**) all had similar RMSE's (4.3 – 4.4 ppm). The bridge-above isomer and the bridge-above with 26R or 26R and 35R structures are not consistent with the observed ROESY correlations (Table S10, Figure S16) because they each have at least one  $^1\text{H}$ - $^1\text{H}$  pair that is predicted to be greater than 5 Å apart, yet a correlation for that pair is observed in the ROESY spectrum. We therefore concluded that the synthetic product **1b** is most likely the proposed bridge-above structure with a *cis* peptide bond



at N19-C19 because it is the structure with the closest match to the experimental NMR spectrum that is still consistent with the ROESY spectrum. A full list of predicted  $^{13}\text{C}$  chemical shifts and error compared to experimental spectra are listed in Table S11 for the natural isolate and in Table S12 for synthetic product **1b**. Previous NMR DFT calculation studies report average errors under 2 ppm for correctly assigned structures while an incorrectly assigned structure had a higher average error, 6.8 ppm.<sup>16</sup> Our errors were also around 2 ppm, with the bridge-above isomer structure having an error of 1.9 and 2.2 ppm for the natural product in DMSO and MeOD, respectively, and the **cis19** structure having an average error of 3.3 ppm when compared to the spectra for the synthetic product **1b** in MeOD.

We also compared the hydrophobic and hydrophilic accessible surface areas of structures with the bridge-above and bridge-below shapes using Maestro's QikProp tool (Table S13). We found that while both structures have similar hydrophobic surface areas, the bridge above structure has a much larger hydrophilic surface area (311.1 vs 274.0 Å<sup>2</sup>). This is consistent with the **1b** being significantly more retentive during liquid chromatography than the natural isolate, as discussed above.

**Figure S14:** RMSE's for predicted spectrum for five conformers for structures selected for further analysis without reassignment for A) natural product in DMSO, B) natural product in MeOD, and C) synthetic product **1b** in MeOD.

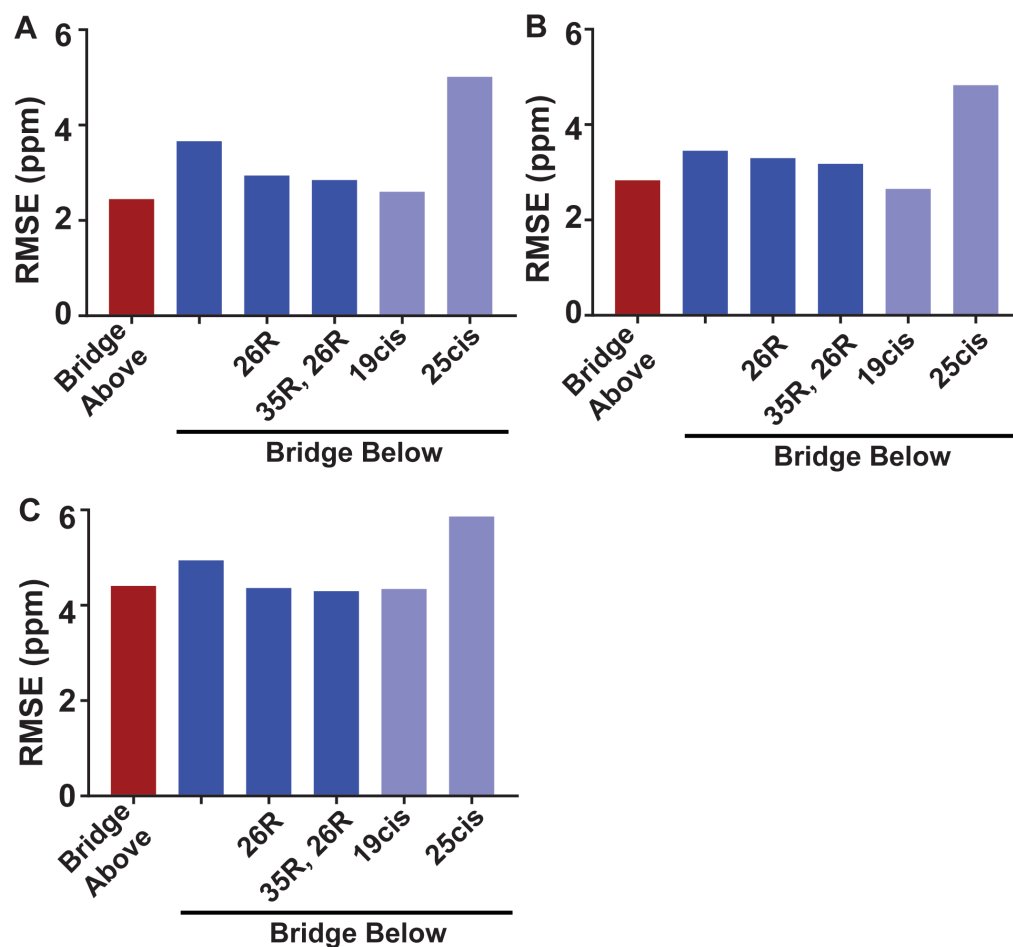

**Table S9.**  $^1\text{H}$ - $^1\text{H}$  distances for observed correlations in the ROESY spectrum of the natural product.

| Experimental nOe | Bridge above ( $\text{\AA}$ ) | Bridge below cis 19 ( $\text{\AA}$ ) |
|------------------|-------------------------------|--------------------------------------|
| H9-H42           | 2.6                           | 5.2                                  |
| H10-H42          | 2.0                           | 4.7                                  |
| H12-H20          | 2.3                           | 4.3                                  |
| H12-H40          | 2.3                           | 4.5                                  |
| H14-H40          | 3.6                           | 3.7                                  |
| H27-H33          | 2.5                           | 2.7                                  |
| H35-H38          | 2.7                           | 4.4                                  |
| H36-H40          | 2.4                           | 2.4                                  |

**Figure S15.** Images showing 1H-1H distances in Table S1 for the minimum energy A) bridge above and B) bridge below cis19 structures

**A**

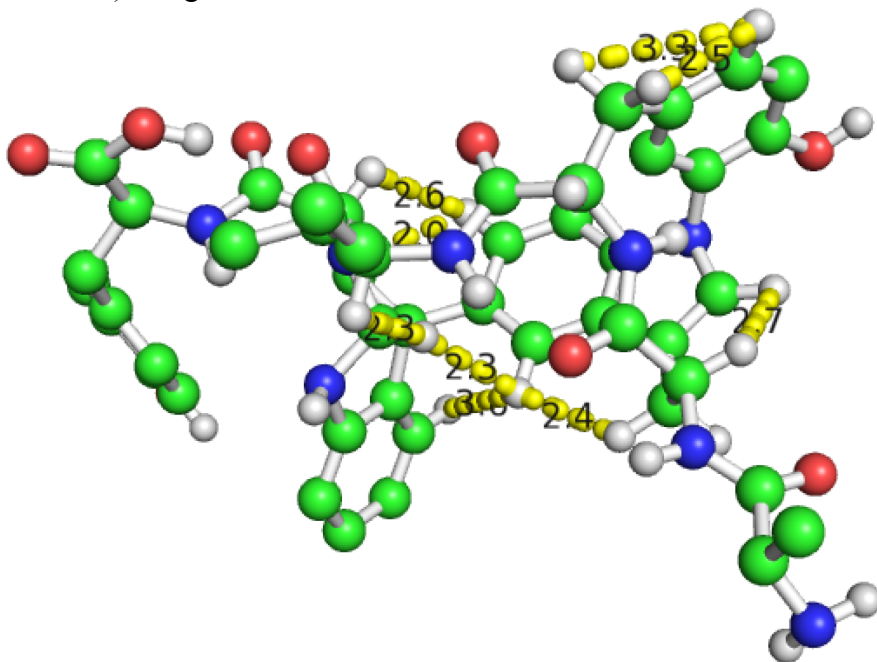

**B**

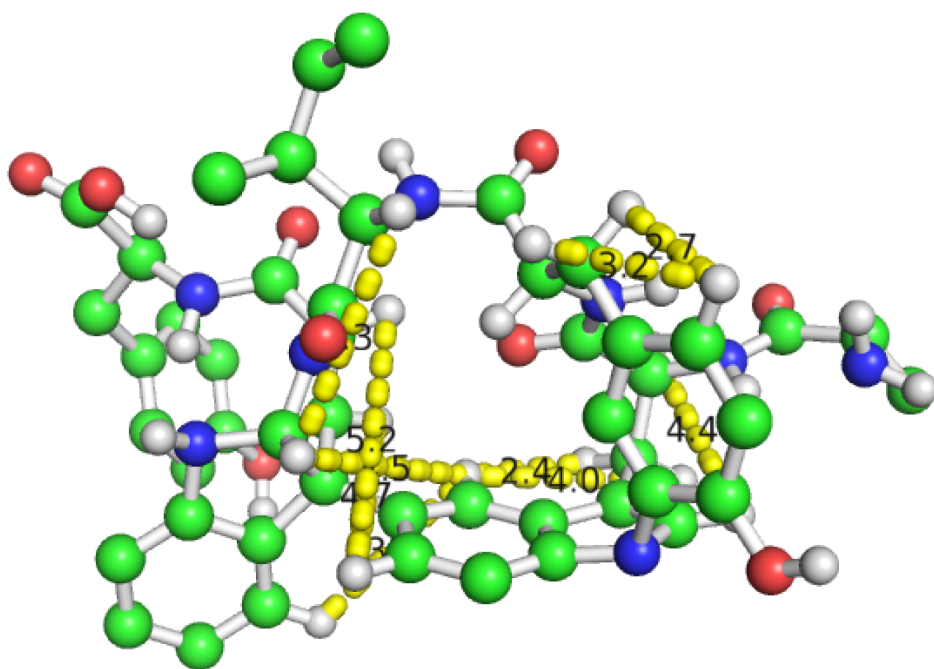

**Table S10.** 1H-1H distances for observed correlations in the ROESY spectrum of the synthetic product 1b. A \* indicates that an alternative low energy conformation had a distance < 4 Å; a \*\* indicates that rotation about a rotatable bond would allow for a distance < 4 Å.

| Experimental<br>nOe | Bridge above<br>(Å) | Bridge below<br>(Å) | Bridge below<br>26R (Å) | Bridge below<br>26R 35R (Å) | Bridge below<br>cis 19 (Å) <sup>a</sup> |
|---------------------|---------------------|---------------------|-------------------------|-----------------------------|-----------------------------------------|
| H9-H40              | 5.1                 | 3.7                 | 2.3                     | 2.2                         | 3.3                                     |
| H10-H14             | 3.5                 | 5.7*                | 3.6                     | 3.5                         | 3.7                                     |
| H10-H17             | 4.6                 | 2.7                 | 4.8                     | 4.8                         | 4.7                                     |
| H10-H40             | 2.0                 | 1.9                 | 2.3                     | 2.4                         | 1.9                                     |
| H12-H20             | 2.3                 | 2.7                 | 2.0                     | 2.0                         | 4.3                                     |
| H12-H40             | 2.3                 | 3.2                 | 3.6                     | 3.5                         | 4.5                                     |
| H12-H26             | 5.0                 | 2.3                 | 5.3                     | 5.4                         | 4.0                                     |
| H12-H42             | 4.3                 | 3.6                 | 3.2                     | 3.3                         | 2.1                                     |
| H27-H29             | 3.0                 | 3.4                 | 2.7                     | 2.7                         | 3.2                                     |
| H27-H33             | 2.5                 | 2.9                 | 2.5                     | 2.5                         | 2.7                                     |
| H29-H43             | 3.2                 | 3.8                 | 3.4                     | 3.3                         | 3.5                                     |
| H36-H38             | 3.1                 | 2.9                 | 3.2                     | 3.1                         | 3.0                                     |
| H36-H40             | 2.4                 | 2.5                 | 2.4                     | 2.4                         | 2.4                                     |
| H38-H47             | 5.5                 | 3.8                 | 6.0**                   | 6.6                         | 3.7                                     |

**Figure S16.** Images showing  $^1\text{H}$ - $^1\text{H}$  distances in Table S1 for the minimum energy A) bridge above, B) bridge=below (**1b**), C) bridge below 26R, D) bridge below 26R 35R, and E) bridge below cis19 structures.

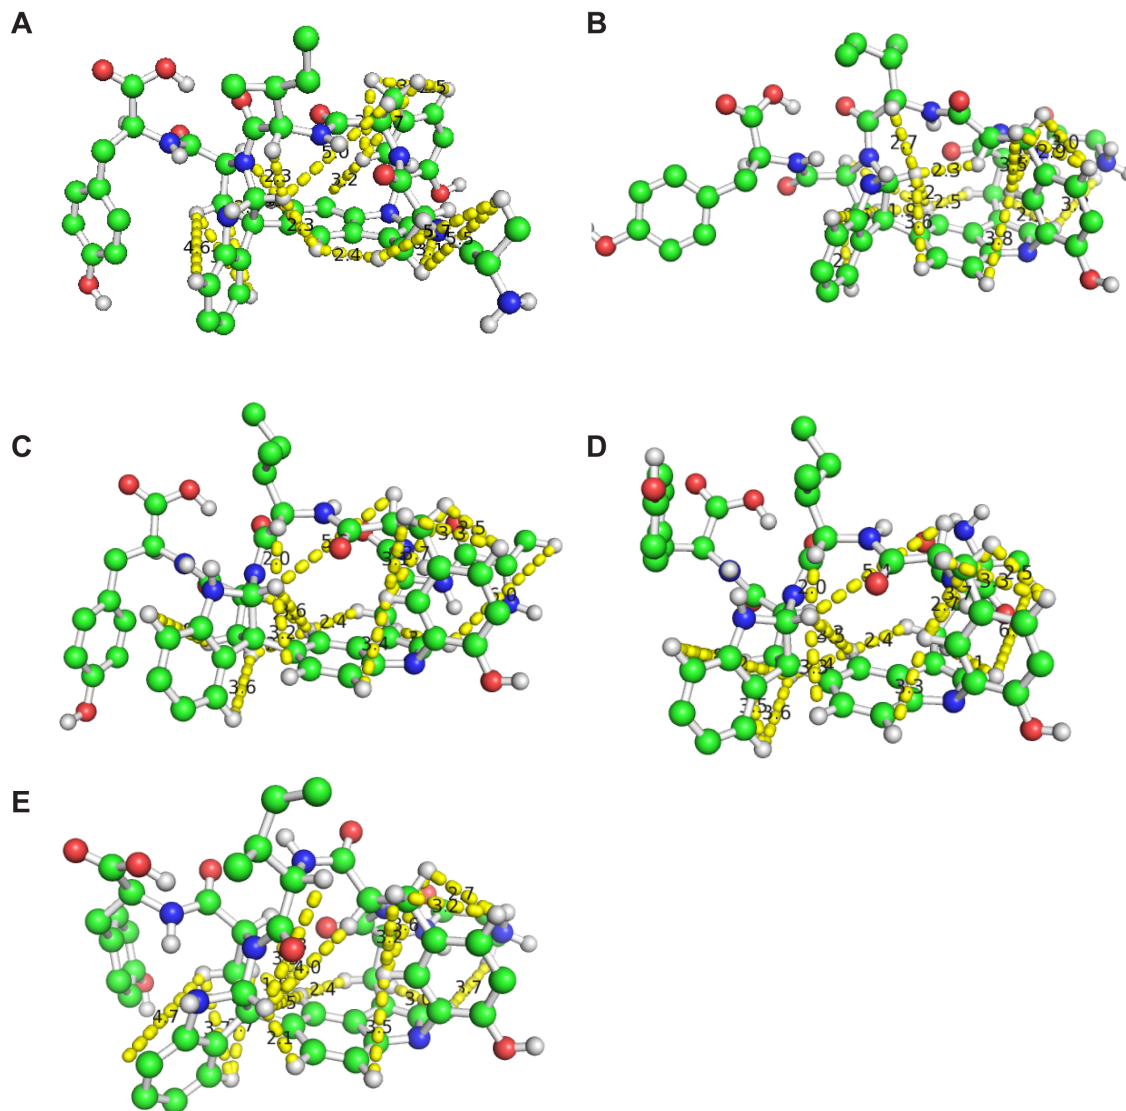

**Table S11.** Comparison between predicted bridge above  $^{13}\text{C}$  shifts and the natural isolate

| Position | $\Delta\text{C}$ predicted | $ \Delta\Delta\text{C} $ (DMSO) | $ \Delta\Delta\text{C} $ (MeOD) |
|----------|----------------------------|---------------------------------|---------------------------------|
| 1        | 169.9                      | 4.1                             | 7.9                             |
| 2        | 55.8                       | 0.8                             | 1.5                             |
| 3        | 38.6                       | 0.7                             | 0.2                             |
| 4        | 129.9                      | 0.1                             | 0.1                             |
| 5        | 130.3                      | 0.3                             | 1.4                             |
| 6        | 112.6                      | 2.3                             | 3.3                             |
| 7        | 155.1                      | 0.7                             | 1.7                             |

|               |       |     |     |
|---------------|-------|-----|-----|
| 8             | 167.6 | 2.5 | 5.8 |
| 9             | 67.6  | 4.5 | 2.3 |
| 10            | 38.9  | 0.2 | 1.4 |
| 11            | 66.2  | 5.3 | 3.3 |
| 12            | 96.2  | 3.9 | 2.1 |
| 13            | 136.8 | 0.5 | 0.2 |
| 14            | 124.1 | 0.7 | 0.1 |
| 15            | 119.9 | 1.5 | 0.7 |
| 16            | 128.0 | 0.2 | 1.4 |
| 17            | 108.3 | 1.7 | 3.7 |
| 18            | 148.4 | 1.2 | 1.9 |
| 19            | 171.2 | 3.6 | 4.9 |
| 20            | 61.7  | 3.5 | 2.0 |
| 21            | 37.8  | 1.3 | 0.2 |
| 22            | 25.9  | 0.6 | 4.8 |
| 23            | 8.6   | 2.9 | 2.9 |
| 24            | 15.2  | 0.4 | 1.1 |
| 25            | 168.4 | 1.8 | 3.1 |
| 26            | 56.3  | 4.3 | 2.8 |
| 27            | 33.3  | 0.9 | 0.1 |
| 28            | 128.9 | 3.0 | 1.2 |
| 29            | 128.8 | 3.0 | 3.0 |
| 30            | 135.0 | 2.5 | 1.2 |
| 31            | 148.8 | 0.8 | 1.4 |
| 32            | 115.8 | 1.7 | 2.4 |
| 33            | 128.7 | 0.4 | 1.2 |
| 34            | 171.5 | 2.5 | 1.7 |
| 35            | 60.2  | 6.2 | 6.5 |
| 36            | 27.9  | 0.4 | 0.4 |
| 37            | 122.3 | 1.4 | 0.6 |
| 38            | 145.8 | 0.6 | 1.9 |
| 39            | 139.6 | 0.5 | 0.6 |
| 40            | 120.5 | 3.1 | 3.1 |
| 41            | 138.9 | 2.8 | 2.8 |
| 42            | 123.2 | 0.1 | 0.1 |
| 43            | 116.6 | 0.9 | 0.6 |
| 44            | 150.3 | 2.8 | 4.4 |
| 45            | 172.0 | 3.2 | 5.1 |
| 46            | 53.5  | 2.8 | 2.5 |
| 47            | 19.7  | 2.3 | 1.4 |
| Average error | N/A   | 1.9 | 2.2 |

**Table S12.** Comparison between predicted bridge below 19-cis  $^{13}\text{C}$  shifts and the synthetic product 1b

| Position | $\Delta\text{C}$ predicted | $ \Delta\Delta\text{C} $ |
|----------|----------------------------|--------------------------|
| 1        | 169.7                      | 5.2                      |
| 2        | 57.2                       | 0.2                      |
| 3        | 39.1                       | 1.3                      |
| 4        | 128.7                      | 1.2                      |
| 5        | 130.0                      | 1.7                      |
| 6        | 113.1                      | 2.8                      |
| 7        | 155.3                      | 6.0                      |
| 8        | 176.8                      | 2.8                      |
| 9        | 63.9                       | 2.9                      |
| 10       | 42.6                       | 0.8                      |
| 11       | 64.0                       | 0.2                      |
| 12       | 95.7                       | 4.1                      |
| 13       | 138.2                      | 0.9                      |
| 14       | 124.5                      | 0.3                      |
| 15       | 120.4                      | 0.9                      |
| 16       | 127.9                      | 1.9                      |
| 17       | 109.7                      | 3.0                      |
| 18       | 147.1                      | 2.7                      |
| 19       | 171.4                      | 4.8                      |
| 20       | 65.2                       | 8.3                      |
| 21       | 39.8                       | 2.3                      |
| 22       | 26.1                       | 0.2                      |
| 23       | 7.5                        | 3.3                      |
| 24       | 15.2                       | 1.2                      |
| 25       | 172.1                      | 0.8                      |
| 26       | 54.8                       | 1.0                      |
| 27       | 31.1                       | 3.3                      |
| 28       | 127.6                      | 7.1                      |
| 29       | 129.9                      | 0.0                      |
| 30       | 135.5                      | 1.3                      |
| 31       | 149.3                      | 7.3                      |
| 32       | 114.1                      | 8.2                      |
| 33       | 126.8                      | 2.8                      |
| 34       | 169.8                      | 0.4                      |
| 35       | 56.0                       | 1.1                      |
| 36       | 28.5                       | 4.8                      |
| 37       | 126.0                      | 5.4                      |
| 38       | 146.7                      | 1.2                      |
| 39       | 141.2                      | 11.3                     |
| 40       | 124.1                      | 6.4                      |

|               |       |      |
|---------------|-------|------|
| 41            | 135.6 | 3.6  |
| 42            | 127.1 | 8.7  |
| 43            | 117.0 | 10.7 |
| 44            | 154.0 | 4.0  |
| 45            | 171.4 | 6.3  |
| 46            | 52.6  | 2.0  |
| 47            | 19.7  | 0.2  |
| Average error | N/A   | 3.3  |

**Table S13.** Predicted hydrophobic and hydrophilic accessible surface areas. Surface areas were calculated using the QikProp tool in Maestro.

| Structure                  | Solvent Accessible Surface Area ( $\text{\AA}^2$ ) | Hydrophobic Accessible Surface Area ( $\text{\AA}^2$ ) | Hydrophilic Accessible Surface Area ( $\text{\AA}^2$ ) |
|----------------------------|----------------------------------------------------|--------------------------------------------------------|--------------------------------------------------------|
| Bridge-above ( <b>1a</b> ) | 1071.1                                             | 380.7                                                  | 311.1                                                  |
| Bridge-below ( <b>1b</b> ) | 1016.7                                             | 380.0                                                  | 274.0                                                  |

## X-ray crystal structures

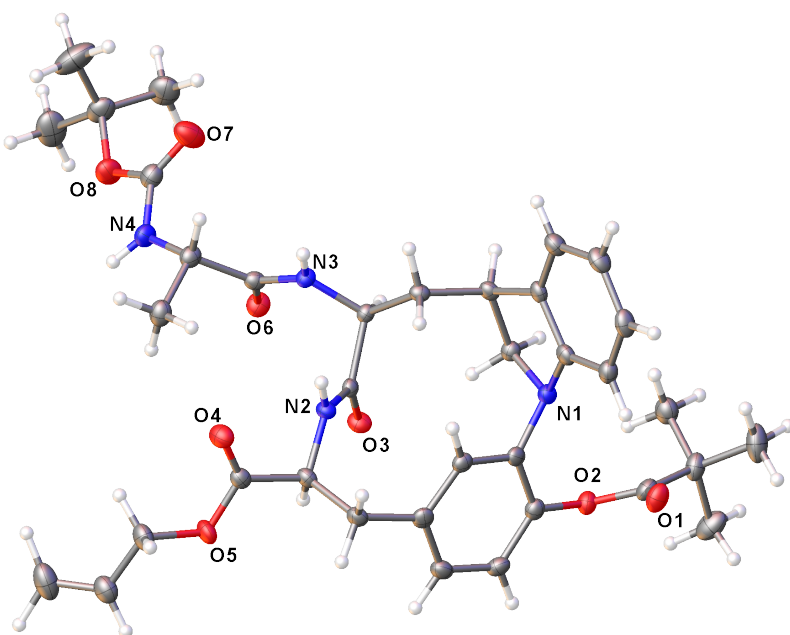

### Compound 7

|                                                                   |                                                               |
|-------------------------------------------------------------------|---------------------------------------------------------------|
| Table 1. Crystal data and structure refinement for baran698_0m_a. |                                                               |
| Identification code                                               | SHR-V-171                                                     |
| Empirical formula                                                 | C <sub>36</sub> H <sub>46</sub> N <sub>4</sub> O <sub>8</sub> |
| Formula weight                                                    | 662.77                                                        |
| Temperature                                                       | 100.0 K                                                       |
| Wavelength                                                        | 1.54178 Å                                                     |



|                                   |                                               |          |
|-----------------------------------|-----------------------------------------------|----------|
| Crystal system                    | Orthorhombic                                  |          |
| Space group                       | P2 <sub>1</sub> 2 <sub>1</sub> 2 <sub>1</sub> |          |
| Unit cell dimensions              | a = 9.70320(10) Å                             | α = 90°. |
| b = 18.7029(3) Å                  | β = 90°.                                      |          |
| c = 19.2126(3) Å                  | γ = 90°.                                      |          |
| Volume                            | 3486.66(9) Å <sup>3</sup>                     |          |
| Z                                 | 4                                             |          |
| Density (calculated)              | 1.263 Mg/m <sup>3</sup>                       |          |
| Absorption coefficient            | 0.733 mm <sup>-1</sup>                        |          |
| F(000)                            | 1416                                          |          |
| Crystal size                      | 0.29 x 0.13 x 0.08 mm <sup>3</sup>            |          |
| Theta range for data collection   | 4.729 to 68.271°.                             |          |
| Index ranges                      | -11 ≤ h ≤ 11, -22 ≤ k ≤ 22, -23 ≤ l ≤ 21      |          |
| Reflections collected             | 17992                                         |          |
| Independent reflections           | 6357 [R(int) = 0.0325]                        |          |
| Completeness to theta = 67.679°   | 99.6 %                                        |          |
| Absorption correction             | Semi-empirical from equivalents               |          |
| Max. and min. transmission        | 0.7531 and 0.6737                             |          |
| Refinement method                 | Full-matrix least-squares on F <sup>2</sup>   |          |
| Data / restraints / parameters    | 6357 / 0 / 448                                |          |
| Goodness-of-fit on F <sup>2</sup> | 1.015                                         |          |
| Final R indices [I > 2σ(I)]       | R1 = 0.0343, wR2 = 0.0893                     |          |
| R indices (all data)              | R1 = 0.0367, wR2 = 0.0906                     |          |
| Absolute structure parameter      | 0.03(8)                                       |          |
| Extinction coefficient            | n/a                                           |          |
| Largest diff. peak and hole       | 0.224 and -0.183 e.Å <sup>-3</sup>            |          |

Table 2. Atomic coordinates ( $\times 10^4$ ) and equivalent isotropic displacement parameters ( $\text{\AA}^2 \times 10^3$ ) for baran698\_0m\_a.  $U(\text{eq})$  is defined as one third of the trace of the orthogonalized  $U^{ij}$  tensor.

| x     | y       | z        | U(eq)   |       |
|-------|---------|----------|---------|-------|
| O(1)  | 4338(2) | -1292(1) | 6362(1) | 30(1) |
| O(2)  | 6071(2) | -567(1)  | 6027(1) | 22(1) |
| O(3)  | 5609(2) | 1829(1)  | 4965(1) | 23(1) |
| O(4)  | 2062(2) | 2403(1)  | 3388(1) | 27(1) |
| O(5)  | 3735(2) | 1960(1)  | 2709(1) | 26(1) |
| O(6)  | 5538(2) | 3557(1)  | 5181(1) | 25(1) |
| O(7)  | 3931(2) | 5266(1)  | 5867(1) | 40(1) |
| O(8)  | 5546(2) | 5802(1)  | 5179(1) | 32(1) |
| N(1)  | 3944(2) | 359(1)   | 6354(1) | 20(1) |
| N(2)  | 3442(2) | 1938(1)  | 4542(1) | 18(1) |
| N(3)  | 3425(2) | 3143(1)  | 5480(1) | 18(1) |
| N(4)  | 4407(2) | 4871(1)  | 4777(1) | 26(1) |
| C(1)  | 5414(3) | -1524(2) | 7677(2) | 43(1) |
| C(2)  | 6701(3) | -398(2)  | 7448(1) | 32(1) |
| C(3)  | 7561(3) | -1555(2) | 6939(2) | 39(1) |
| C(4)  | 6280(3) | -1120(1) | 7142(1) | 27(1) |
| C(5)  | 5421(3) | -1013(1) | 6488(1) | 23(1) |
| C(6)  | 5257(2) | -296(1)  | 5487(1) | 22(1) |
| C(7)  | 5655(3) | -410(1)  | 4803(1) | 24(1) |
| C(8)  | 4949(3) | -68(1)   | 4272(1) | 24(1) |
| C(9)  | 3809(2) | 358(1)   | 4414(1) | 21(1) |
| C(10) | 3381(2) | 430(1)   | 5102(1) | 20(1) |
| C(11) | 4148(2) | 142(1)   | 5643(1) | 19(1) |
| C(12) | 2611(2) | 369(1)   | 6645(1) | 20(1) |
| C(13) | 1716(3) | -208(1)  | 6704(1) | 24(1) |
| C(14) | 488(3)  | -102(1)  | 7066(1) | 27(1) |
| C(15) | 165(3)  | 561(2)   | 7354(1) | 28(1) |
| C(16) | 1056(3) | 1139(1)  | 7276(1) | 25(1) |
| C(17) | 2280(2) | 1041(1)  | 6919(1) | 20(1) |
| C(18) | 3382(2) | 1572(1)  | 6709(1) | 19(1) |
| C(19) | 4578(2) | 1068(1)  | 6525(1) | 19(1) |

|       |         |         |         |       |
|-------|---------|---------|---------|-------|
| C(20) | 2827(2) | 2047(1) | 6112(1) | 18(1) |
| C(21) | 3943(2) | 2444(1) | 5690(1) | 17(1) |
| C(22) | 4411(2) | 2035(1) | 5031(1) | 17(1) |
| C(23) | 3716(2) | 1586(1) | 3884(1) | 20(1) |
| C(24) | 3131(3) | 810(1)  | 3858(1) | 22(1) |
| C(25) | 3062(2) | 2035(1) | 3310(1) | 21(1) |
| C(26) | 3126(3) | 2350(2) | 2122(1) | 29(1) |
| C(27) | 4109(3) | 2351(2) | 1544(1) | 32(1) |
| C(28) | 4509(4) | 2936(2) | 1224(2) | 46(1) |
| C(29) | 4276(2) | 3627(1) | 5190(1) | 20(1) |
| C(30) | 3549(2) | 4243(1) | 4824(1) | 23(1) |
| C(31) | 3162(3) | 3991(1) | 4094(1) | 28(1) |
| C(32) | 4575(3) | 5311(1) | 5333(1) | 26(1) |
| C(33) | 5848(3) | 6386(2) | 5666(2) | 34(1) |
| C(34) | 6363(4) | 6097(2) | 6355(2) | 44(1) |
| C(35) | 4587(4) | 6854(2) | 5736(2) | 60(1) |
| C(36) | 7008(4) | 6773(2) | 5298(2) | 50(1) |

---

Table 3. Bond lengths [Å] and angles [°] for baran698\_0m\_a.

---

|            |          |
|------------|----------|
| O(1)-C(5)  | 1.197(3) |
| O(2)-C(5)  | 1.372(3) |
| O(2)-C(6)  | 1.399(3) |
| O(3)-C(22) | 1.230(3) |
| O(4)-C(25) | 1.199(3) |
| O(5)-C(25) | 1.334(3) |
| O(5)-C(26) | 1.468(3) |
| O(6)-C(29) | 1.232(3) |
| O(7)-C(32) | 1.204(3) |
| O(8)-C(32) | 1.349(3) |
| O(8)-C(33) | 1.467(3) |
| N(1)-C(11) | 1.438(3) |
| N(1)-C(12) | 1.409(3) |
| N(1)-C(19) | 1.499(3) |
| N(2)-H(2)  | 0.8800   |
| N(2)-C(22) | 1.340(3) |
| N(2)-C(23) | 1.450(3) |
| N(3)-H(3)  | 0.8800   |
| N(3)-C(21) | 1.458(3) |
| N(3)-C(29) | 1.345(3) |
| N(4)-H(4)  | 0.8800   |
| N(4)-C(30) | 1.442(3) |
| N(4)-C(32) | 1.358(3) |
| C(1)-H(1A) | 0.9800   |
| C(1)-H(1B) | 0.9800   |
| C(1)-H(1C) | 0.9800   |
| C(1)-C(4)  | 1.527(4) |
| C(2)-H(2A) | 0.9800   |
| C(2)-H(2B) | 0.9800   |
| C(2)-H(2C) | 0.9800   |
| C(2)-C(4)  | 1.529(4) |
| C(3)-H(3A) | 0.9800   |
| C(3)-H(3B) | 0.9800   |
| C(3)-H(3C) | 0.9800   |

|              |          |
|--------------|----------|
| C(3)-C(4)    | 1.536(4) |
| C(4)-C(5)    | 1.521(3) |
| C(6)-C(7)    | 1.387(3) |
| C(6)-C(11)   | 1.385(3) |
| C(7)-H(7)    | 0.9500   |
| C(7)-C(8)    | 1.387(4) |
| C(8)-H(8)    | 0.9500   |
| C(8)-C(9)    | 1.390(4) |
| C(9)-C(10)   | 1.392(3) |
| C(9)-C(24)   | 1.514(3) |
| C(10)-H(10)  | 0.9500   |
| C(10)-C(11)  | 1.387(3) |
| C(12)-C(13)  | 1.389(3) |
| C(12)-C(17)  | 1.399(3) |
| C(13)-H(13)  | 0.9500   |
| C(13)-C(14)  | 1.394(4) |
| C(14)-H(14)  | 0.9500   |
| C(14)-C(15)  | 1.393(4) |
| C(15)-H(15)  | 0.9500   |
| C(15)-C(16)  | 1.393(4) |
| C(16)-H(16)  | 0.9500   |
| C(16)-C(17)  | 1.384(3) |
| C(17)-C(18)  | 1.514(3) |
| C(18)-H(18)  | 1.0000   |
| C(18)-C(19)  | 1.536(3) |
| C(18)-C(20)  | 1.548(3) |
| C(19)-H(19A) | 0.9900   |
| C(19)-H(19B) | 0.9900   |
| C(20)-H(20A) | 0.9900   |
| C(20)-H(20B) | 0.9900   |
| C(20)-C(21)  | 1.544(3) |
| C(21)-H(21)  | 1.0000   |
| C(21)-C(22)  | 1.549(3) |
| C(23)-H(23)  | 1.0000   |
| C(23)-C(24)  | 1.560(3) |
| C(23)-C(25)  | 1.524(3) |

|                  |            |
|------------------|------------|
| C(24)-H(24A)     | 0.9900     |
| C(24)-H(24B)     | 0.9900     |
| C(26)-H(26A)     | 0.9900     |
| C(26)-H(26B)     | 0.9900     |
| C(26)-C(27)      | 1.463(4)   |
| C(27)-H(27)      | 0.9500     |
| C(27)-C(28)      | 1.314(4)   |
| C(28)-H(28A)     | 1.04(4)    |
| C(28)-H(28B)     | 1.06(4)    |
| C(29)-C(30)      | 1.522(3)   |
| C(30)-H(30)      | 1.0000     |
| C(30)-C(31)      | 1.527(4)   |
| C(31)-H(31A)     | 0.9800     |
| C(31)-H(31B)     | 0.9800     |
| C(31)-H(31C)     | 0.9800     |
| C(33)-C(34)      | 1.514(4)   |
| C(33)-C(35)      | 1.511(4)   |
| C(33)-C(36)      | 1.513(4)   |
| C(34)-H(34A)     | 0.9800     |
| C(34)-H(34B)     | 0.9800     |
| C(34)-H(34C)     | 0.9800     |
| C(35)-H(35A)     | 0.9800     |
| C(35)-H(35B)     | 0.9800     |
| C(35)-H(35C)     | 0.9800     |
| C(36)-H(36A)     | 0.9800     |
| C(36)-H(36B)     | 0.9800     |
| C(36)-H(36C)     | 0.9800     |
|                  |            |
| C(5)-O(2)-C(6)   | 116.08(18) |
| C(25)-O(5)-C(26) | 114.54(19) |
| C(32)-O(8)-C(33) | 120.5(2)   |
| C(11)-N(1)-C(19) | 113.64(18) |
| C(12)-N(1)-C(11) | 120.47(18) |
| C(12)-N(1)-C(19) | 106.18(18) |
| C(22)-N(2)-H(2)  | 118.6      |
| C(22)-N(2)-C(23) | 122.86(19) |

|                  |            |
|------------------|------------|
| C(23)-N(2)-H(2)  | 118.6      |
| C(21)-N(3)-H(3)  | 119.8      |
| C(29)-N(3)-H(3)  | 119.8      |
| C(29)-N(3)-C(21) | 120.41(19) |
| C(30)-N(4)-H(4)  | 119.6      |
| C(32)-N(4)-H(4)  | 119.6      |
| C(32)-N(4)-C(30) | 120.8(2)   |
| H(1A)-C(1)-H(1B) | 109.5      |
| H(1A)-C(1)-H(1C) | 109.5      |
| H(1B)-C(1)-H(1C) | 109.5      |
| C(4)-C(1)-H(1A)  | 109.5      |
| C(4)-C(1)-H(1B)  | 109.5      |
| C(4)-C(1)-H(1C)  | 109.5      |
| H(2A)-C(2)-H(2B) | 109.5      |
| H(2A)-C(2)-H(2C) | 109.5      |
| H(2B)-C(2)-H(2C) | 109.5      |
| C(4)-C(2)-H(2A)  | 109.5      |
| C(4)-C(2)-H(2B)  | 109.5      |
| C(4)-C(2)-H(2C)  | 109.5      |
| H(3A)-C(3)-H(3B) | 109.5      |
| H(3A)-C(3)-H(3C) | 109.5      |
| H(3B)-C(3)-H(3C) | 109.5      |
| C(4)-C(3)-H(3A)  | 109.5      |
| C(4)-C(3)-H(3B)  | 109.5      |
| C(4)-C(3)-H(3C)  | 109.5      |
| C(1)-C(4)-C(2)   | 109.0(2)   |
| C(1)-C(4)-C(3)   | 110.8(2)   |
| C(2)-C(4)-C(3)   | 110.5(2)   |
| C(5)-C(4)-C(1)   | 108.6(2)   |
| C(5)-C(4)-C(2)   | 110.3(2)   |
| C(5)-C(4)-C(3)   | 107.7(2)   |
| O(1)-C(5)-O(2)   | 122.6(2)   |
| O(1)-C(5)-C(4)   | 126.2(2)   |
| O(2)-C(5)-C(4)   | 111.2(2)   |
| C(7)-C(6)-O(2)   | 119.3(2)   |
| C(11)-C(6)-O(2)  | 119.5(2)   |

|                   |            |
|-------------------|------------|
| C(11)-C(6)-C(7)   | 120.8(2)   |
| C(6)-C(7)-H(7)    | 120.4      |
| C(6)-C(7)-C(8)    | 119.3(2)   |
| C(8)-C(7)-H(7)    | 120.4      |
| C(7)-C(8)-H(8)    | 119.6      |
| C(7)-C(8)-C(9)    | 120.9(2)   |
| C(9)-C(8)-H(8)    | 119.6      |
| C(8)-C(9)-C(10)   | 118.7(2)   |
| C(8)-C(9)-C(24)   | 121.8(2)   |
| C(10)-C(9)-C(24)  | 119.1(2)   |
| C(9)-C(10)-H(10)  | 119.6      |
| C(11)-C(10)-C(9)  | 120.9(2)   |
| C(11)-C(10)-H(10) | 119.6      |
| C(6)-C(11)-N(1)   | 118.6(2)   |
| C(6)-C(11)-C(10)  | 119.0(2)   |
| C(10)-C(11)-N(1)  | 121.9(2)   |
| C(13)-C(12)-N(1)  | 126.6(2)   |
| C(13)-C(12)-C(17) | 121.5(2)   |
| C(17)-C(12)-N(1)  | 111.8(2)   |
| C(12)-C(13)-H(13) | 121.1      |
| C(12)-C(13)-C(14) | 117.7(2)   |
| C(14)-C(13)-H(13) | 121.1      |
| C(13)-C(14)-H(14) | 119.4      |
| C(15)-C(14)-C(13) | 121.1(2)   |
| C(15)-C(14)-H(14) | 119.4      |
| C(14)-C(15)-H(15) | 119.7      |
| C(14)-C(15)-C(16) | 120.6(2)   |
| C(16)-C(15)-H(15) | 119.7      |
| C(15)-C(16)-H(16) | 120.6      |
| C(17)-C(16)-C(15) | 118.8(2)   |
| C(17)-C(16)-H(16) | 120.6      |
| C(12)-C(17)-C(18) | 109.1(2)   |
| C(16)-C(17)-C(12) | 120.2(2)   |
| C(16)-C(17)-C(18) | 130.5(2)   |
| C(17)-C(18)-H(18) | 109.9      |
| C(17)-C(18)-C(19) | 101.10(19) |



|                     |            |
|---------------------|------------|
| C(17)-C(18)-C(20)   | 109.18(19) |
| C(19)-C(18)-H(18)   | 109.9      |
| C(19)-C(18)-C(20)   | 116.39(19) |
| C(20)-C(18)-H(18)   | 109.9      |
| N(1)-C(19)-C(18)    | 106.40(18) |
| N(1)-C(19)-H(19A)   | 110.4      |
| N(1)-C(19)-H(19B)   | 110.4      |
| C(18)-C(19)-H(19A)  | 110.4      |
| C(18)-C(19)-H(19B)  | 110.4      |
| H(19A)-C(19)-H(19B) | 108.6      |
| C(18)-C(20)-H(20A)  | 108.5      |
| C(18)-C(20)-H(20B)  | 108.5      |
| H(20A)-C(20)-H(20B) | 107.5      |
| C(21)-C(20)-C(18)   | 114.91(18) |
| C(21)-C(20)-H(20A)  | 108.5      |
| C(21)-C(20)-H(20B)  | 108.5      |
| N(3)-C(21)-C(20)    | 109.55(18) |
| N(3)-C(21)-H(21)    | 108.4      |
| N(3)-C(21)-C(22)    | 108.51(18) |
| C(20)-C(21)-H(21)   | 108.4      |
| C(20)-C(21)-C(22)   | 113.44(18) |
| C(22)-C(21)-H(21)   | 108.4      |
| O(3)-C(22)-N(2)     | 123.3(2)   |
| O(3)-C(22)-C(21)    | 121.0(2)   |
| N(2)-C(22)-C(21)    | 115.67(18) |
| N(2)-C(23)-H(23)    | 108.9      |
| N(2)-C(23)-C(24)    | 112.55(18) |
| N(2)-C(23)-C(25)    | 107.77(19) |
| C(24)-C(23)-H(23)   | 108.9      |
| C(25)-C(23)-H(23)   | 108.9      |
| C(25)-C(23)-C(24)   | 109.76(19) |
| C(9)-C(24)-C(23)    | 109.83(19) |
| C(9)-C(24)-H(24A)   | 109.7      |
| C(9)-C(24)-H(24B)   | 109.7      |
| C(23)-C(24)-H(24A)  | 109.7      |
| C(23)-C(24)-H(24B)  | 109.7      |

|                     |            |
|---------------------|------------|
| H(24A)-C(24)-H(24B) | 108.2      |
| O(4)-C(25)-O(5)     | 124.4(2)   |
| O(4)-C(25)-C(23)    | 124.2(2)   |
| O(5)-C(25)-C(23)    | 111.38(19) |
| O(5)-C(26)-H(26A)   | 110.0      |
| O(5)-C(26)-H(26B)   | 110.0      |
| H(26A)-C(26)-H(26B) | 108.3      |
| C(27)-C(26)-O(5)    | 108.7(2)   |
| C(27)-C(26)-H(26A)  | 110.0      |
| C(27)-C(26)-H(26B)  | 110.0      |
| C(26)-C(27)-H(27)   | 118.4      |
| C(28)-C(27)-C(26)   | 123.2(3)   |
| C(28)-C(27)-H(27)   | 118.4      |
| C(27)-C(28)-H(28A)  | 114(2)     |
| C(27)-C(28)-H(28B)  | 121(2)     |
| H(28A)-C(28)-H(28B) | 124(3)     |
| O(6)-C(29)-N(3)     | 123.0(2)   |
| O(6)-C(29)-C(30)    | 122.3(2)   |
| N(3)-C(29)-C(30)    | 114.5(2)   |
| N(4)-C(30)-C(29)    | 112.2(2)   |
| N(4)-C(30)-H(30)    | 109.1      |
| N(4)-C(30)-C(31)    | 109.6(2)   |
| C(29)-C(30)-H(30)   | 109.1      |
| C(29)-C(30)-C(31)   | 107.7(2)   |
| C(31)-C(30)-H(30)   | 109.1      |
| C(30)-C(31)-H(31A)  | 109.5      |
| C(30)-C(31)-H(31B)  | 109.5      |
| C(30)-C(31)-H(31C)  | 109.5      |
| H(31A)-C(31)-H(31B) | 109.5      |
| H(31A)-C(31)-H(31C) | 109.5      |
| H(31B)-C(31)-H(31C) | 109.5      |
| O(7)-C(32)-O(8)     | 126.6(2)   |
| O(7)-C(32)-N(4)     | 124.5(2)   |
| O(8)-C(32)-N(4)     | 108.9(2)   |
| O(8)-C(33)-C(34)    | 111.0(2)   |
| O(8)-C(33)-C(35)    | 109.0(2)   |

|                     |          |
|---------------------|----------|
| O(8)-C(33)-C(36)    | 101.9(2) |
| C(34)-C(33)-C(36)   | 109.5(3) |
| C(35)-C(33)-C(34)   | 113.4(3) |
| C(35)-C(33)-C(36)   | 111.5(3) |
| C(33)-C(34)-H(34A)  | 109.5    |
| C(33)-C(34)-H(34B)  | 109.5    |
| C(33)-C(34)-H(34C)  | 109.5    |
| H(34A)-C(34)-H(34B) | 109.5    |
| H(34A)-C(34)-H(34C) | 109.5    |
| H(34B)-C(34)-H(34C) | 109.5    |
| C(33)-C(35)-H(35A)  | 109.5    |
| C(33)-C(35)-H(35B)  | 109.5    |
| C(33)-C(35)-H(35C)  | 109.5    |
| H(35A)-C(35)-H(35B) | 109.5    |
| H(35A)-C(35)-H(35C) | 109.5    |
| H(35B)-C(35)-H(35C) | 109.5    |
| C(33)-C(36)-H(36A)  | 109.5    |
| C(33)-C(36)-H(36B)  | 109.5    |
| C(33)-C(36)-H(36C)  | 109.5    |
| H(36A)-C(36)-H(36B) | 109.5    |
| H(36A)-C(36)-H(36C) | 109.5    |
| H(36B)-C(36)-H(36C) | 109.5    |

---

Symmetry transformations used to generate equivalent atoms:

Table 4. Anisotropic displacement parameters ( $\text{\AA}^2 \times 10^3$ ) for baran698\_0m\_a. The anisotropic displacement factor exponent takes the form:  $-2\pi^2 [ h^2 a^{*2} U^{11} + \dots + 2 h k a^* b^* U^{12} ]$

| U <sup>11</sup> | U <sup>22</sup> | U <sup>33</sup> | U <sup>23</sup> | U <sup>13</sup> | U <sup>12</sup> |        |
|-----------------|-----------------|-----------------|-----------------|-----------------|-----------------|--------|
| O(1)            | 29(1)           | 21(1)           | 39(1)           | 5(1)            | -7(1)           | -5(1)  |
| O(2)            | 22(1)           | 22(1)           | 24(1)           | 4(1)            | -2(1)           | 0(1)   |
| O(3)            | 16(1)           | 30(1)           | 23(1)           | -2(1)           | 1(1)            | 2(1)   |
| O(4)            | 24(1)           | 34(1)           | 24(1)           | 0(1)            | -2(1)           | 4(1)   |
| O(5)            | 28(1)           | 33(1)           | 16(1)           | 5(1)            | 0(1)            | 2(1)   |
| O(6)            | 17(1)           | 27(1)           | 30(1)           | 2(1)            | 0(1)            | -3(1)  |
| O(7)            | 44(1)           | 45(1)           | 31(1)           | -8(1)           | 6(1)            | -13(1) |
| O(8)            | 37(1)           | 28(1)           | 32(1)           | -3(1)           | -2(1)           | -10(1) |
| N(1)            | 21(1)           | 19(1)           | 18(1)           | 1(1)            | 1(1)            | -2(1)  |
| N(2)            | 15(1)           | 22(1)           | 16(1)           | -1(1)           | 1(1)            | 1(1)   |
| N(3)            | 13(1)           | 19(1)           | 21(1)           | 1(1)            | 0(1)            | 1(1)   |
| N(4)            | 29(1)           | 21(1)           | 27(1)           | 0(1)            | 2(1)            | -4(1)  |
| C(1)            | 38(2)           | 48(2)           | 44(2)           | 23(2)           | -8(1)           | -12(1) |
| C(2)            | 36(2)           | 32(1)           | 27(1)           | 3(1)            | -4(1)           | -1(1)  |
| C(3)            | 33(2)           | 32(1)           | 52(2)           | -2(1)           | -15(1)          | 7(1)   |
| C(4)            | 25(1)           | 25(1)           | 32(1)           | 8(1)            | -3(1)           | -3(1)  |
| C(5)            | 25(1)           | 15(1)           | 29(1)           | 1(1)            | 0(1)            | 2(1)   |
| C(6)            | 23(1)           | 18(1)           | 24(1)           | 1(1)            | -2(1)           | -2(1)  |
| C(7)            | 25(1)           | 20(1)           | 27(1)           | -4(1)           | 0(1)            | 2(1)   |
| C(8)            | 29(1)           | 23(1)           | 20(1)           | -5(1)           | 3(1)            | -1(1)  |
| C(9)            | 25(1)           | 18(1)           | 21(1)           | -4(1)           | -3(1)           | -3(1)  |
| C(10)           | 19(1)           | 17(1)           | 23(1)           | -1(1)           | 2(1)            | -2(1)  |
| C(11)           | 20(1)           | 16(1)           | 21(1)           | 1(1)            | 2(1)            | -4(1)  |
| C(12)           | 22(1)           | 25(1)           | 14(1)           | 3(1)            | -2(1)           | 0(1)   |
| C(13)           | 28(1)           | 23(1)           | 22(1)           | 4(1)            | -2(1)           | -2(1)  |
| C(14)           | 25(1)           | 32(1)           | 25(1)           | 8(1)            | -2(1)           | -8(1)  |
| C(15)           | 21(1)           | 39(1)           | 22(1)           | 5(1)            | 4(1)            | -3(1)  |
| C(16)           | 26(1)           | 29(1)           | 19(1)           | 1(1)            | 3(1)            | -1(1)  |
| C(17)           | 22(1)           | 24(1)           | 14(1)           | 3(1)            | -3(1)           | -3(1)  |
| C(18)           | 20(1)           | 23(1)           | 14(1)           | -3(1)           | -1(1)           | -2(1)  |
| C(19)           | 19(1)           | 20(1)           | 19(1)           | 1(1)            | -3(1)           | -1(1)  |

|       |       |       |       |        |        |        |
|-------|-------|-------|-------|--------|--------|--------|
| C(20) | 15(1) | 20(1) | 17(1) | -2(1)  | 2(1)   | 0(1)   |
| C(21) | 15(1) | 18(1) | 17(1) | 1(1)   | -2(1)  | -1(1)  |
| C(22) | 16(1) | 17(1) | 18(1) | 3(1)   | 2(1)   | -2(1)  |
| C(23) | 20(1) | 24(1) | 15(1) | 0(1)   | 1(1)   | -1(1)  |
| C(24) | 25(1) | 24(1) | 16(1) | -2(1)  | -1(1)  | -1(1)  |
| C(25) | 20(1) | 23(1) | 18(1) | -2(1)  | 0(1)   | -5(1)  |
| C(26) | 28(1) | 37(1) | 21(1) | 8(1)   | -2(1)  | 0(1)   |
| C(27) | 33(2) | 40(2) | 23(1) | 3(1)   | -3(1)  | -2(1)  |
| C(28) | 48(2) | 57(2) | 32(2) | 12(2)  | -6(1)  | -16(2) |
| C(29) | 18(1) | 22(1) | 20(1) | -4(1)  | 0(1)   | -2(1)  |
| C(30) | 21(1) | 23(1) | 27(1) | 1(1)   | 3(1)   | -2(1)  |
| C(31) | 30(1) | 27(1) | 29(1) | 4(1)   | -5(1)  | -5(1)  |
| C(32) | 27(1) | 24(1) | 28(1) | 2(1)   | -2(1)  | 0(1)   |
| C(33) | 40(2) | 27(1) | 35(2) | -7(1)  | -10(1) | -3(1)  |
| C(34) | 51(2) | 44(2) | 36(2) | -8(1)  | -11(1) | -5(2)  |
| C(35) | 52(2) | 35(2) | 94(3) | -20(2) | -16(2) | 7(2)   |
| C(36) | 61(2) | 44(2) | 45(2) | 0(2)   | -13(2) | -24(2) |

---

Table 5. Hydrogen coordinates ( $\times 10^4$ ) and isotropic displacement parameters ( $\text{\AA}^2 \times 10^{-3}$ ) for baran698\_0m\_a.

| x      | y    | z     | U(eq) |    |
|--------|------|-------|-------|----|
| H(2)   | 2603 | 2095  | 4625  | 21 |
| H(3)   | 2550 | 3249  | 5542  | 21 |
| H(4)   | 4827 | 4970  | 4383  | 31 |
| H(1A)  | 4569 | -1254 | 7773  | 65 |
| H(1B)  | 5942 | -1580 | 8108  | 65 |
| H(1C)  | 5174 | -1996 | 7493  | 65 |
| H(2A)  | 7279 | -141  | 7113  | 48 |
| H(2B)  | 7220 | -474  | 7879  | 48 |
| H(2C)  | 5874 | -115  | 7548  | 48 |
| H(3A)  | 7278 | -2030 | 6778  | 59 |
| H(3B)  | 8167 | -1605 | 7344  | 59 |
| H(3C)  | 8056 | -1308 | 6565  | 59 |
| H(7)   | 6404 | -720  | 4700  | 28 |
| H(8)   | 5247 | -126  | 3804  | 29 |
| H(10)  | 2552 | 680   | 5202  | 24 |
| H(13)  | 1932 | -658  | 6503  | 29 |
| H(14)  | -139 | -488  | 7117  | 33 |
| H(15)  | -670 | 619   | 7606  | 33 |
| H(16)  | 828  | 1594  | 7464  | 30 |
| H(18)  | 3638 | 1876  | 7117  | 23 |
| H(19A) | 5098 | 1255  | 6121  | 23 |
| H(19B) | 5218 | 1022  | 6924  | 23 |
| H(20A) | 2288 | 1744  | 5790  | 21 |
| H(20B) | 2189 | 2405  | 6313  | 21 |
| H(21)  | 4764 | 2517  | 5997  | 20 |
| H(23)  | 4735 | 1569  | 3808  | 24 |
| H(24A) | 2122 | 820   | 3933  | 26 |
| H(24B) | 3309 | 599   | 3394  | 26 |
| H(26A) | 2256 | 2117  | 1976  | 34 |
| H(26B) | 2915 | 2848  | 2262  | 34 |

|        |          |          |          |        |
|--------|----------|----------|----------|--------|
| H(27)  | 4477     | 1906     | 1394     | 38     |
| H(28A) | 4060(40) | 3400(20) | 1415(19) | 48(10) |
| H(28B) | 5120(40) | 2910(20) | 770(20)  | 68(13) |
| H(30)  | 2689     | 4365     | 5086     | 28     |
| H(31A) | 2658     | 4371     | 3853     | 43     |
| H(31B) | 2579     | 3564     | 4127     | 43     |
| H(31C) | 4001     | 3875     | 3833     | 43     |
| H(34A) | 5618     | 5836     | 6588     | 66     |
| H(34B) | 6663     | 6494     | 6651     | 66     |
| H(34C) | 7140     | 5773     | 6273     | 66     |
| H(35A) | 4250     | 6983     | 5272     | 91     |
| H(35B) | 4826     | 7289     | 5993     | 91     |
| H(35C) | 3866     | 6593     | 5987     | 91     |
| H(36A) | 7784     | 6445     | 5231     | 75     |
| H(36B) | 7306     | 7181     | 5580     | 75     |
| H(36C) | 6684     | 6943     | 4844     | 75     |

---

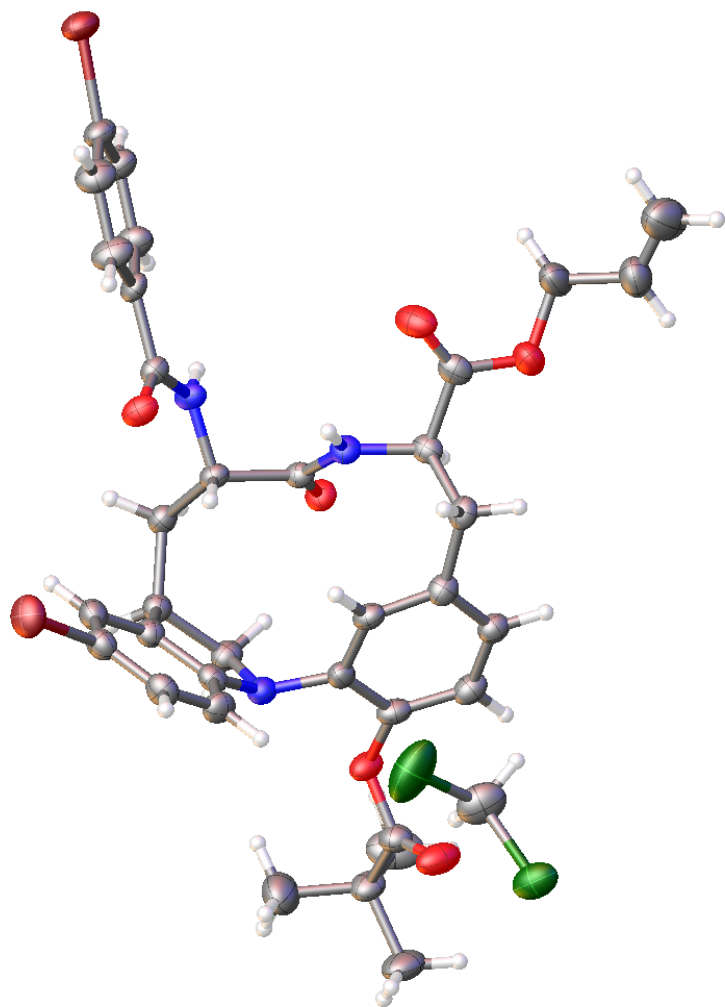

Compound *epi*-SI-21



Table 1. Crystal data and structure refinement for baran736.

|                                   |                                             |                        |
|-----------------------------------|---------------------------------------------|------------------------|
| Report date                       | 2019-07-31                                  |                        |
| Identification code               | baran736_0m_a                               |                        |
| Empirical formula                 | C36 H36 Br2 Cl2 N3 O6                       |                        |
| Molecular formula                 | C35 H34 Br2 N3 O6, C H2 Cl2                 |                        |
| Formula weight                    | 837.40                                      |                        |
| Temperature                       | 100.15 K                                    |                        |
| Wavelength                        | 1.54178 Å                                   |                        |
| Crystal system                    | Hexagonal                                   |                        |
| Space group                       | P6 <sub>1</sub>                             |                        |
| Unit cell dimensions              | a = 15.1618(10) Å                           | $\alpha = 90^\circ$ .  |
|                                   | b = 15.1618(10) Å                           | $\beta = 90^\circ$ .   |
|                                   | c = 27.351(2) Å                             | $\gamma = 120^\circ$ . |
| Volume                            | 5445.2(8) Å <sup>3</sup>                    |                        |
| Z                                 | 6                                           |                        |
| Density (calculated)              | 1.532 Mg/m <sup>3</sup>                     |                        |
| Absorption coefficient            | 4.593 mm <sup>-1</sup>                      |                        |
| F(000)                            | 2550                                        |                        |
| Crystal size                      | 0.22 x 0.14 x 0.12 mm <sup>3</sup>          |                        |
| Crystal color, habit              | clear colourless block                      |                        |
| Theta range for data collection   | 1.615 to 72.538°.                           |                        |
| Index ranges                      | -18<=h<=18, -18<=k<=18, -33<=l<=33          |                        |
| Reflections collected             | 51813                                       |                        |
| Independent reflections           | 7165 [R(int) = 0.0547]                      |                        |
| Completeness to theta = 67.679°   | 100.0 %                                     |                        |
| Absorption correction             | Semi-empirical from equivalents             |                        |
| Max. and min. transmission        | 0.3246 and 0.1867                           |                        |
| Refinement method                 | Full-matrix least-squares on F <sup>2</sup> |                        |
| Data / restraints / parameters    | 7165 / 3 / 452                              |                        |
| Goodness-of-fit on F <sup>2</sup> | 1.051                                       |                        |
| Final R indices [I>2sigma(I)]     | R1 = 0.0385, wR2 = 0.1045                   |                        |
| R indices (all data)              | R1 = 0.0396, wR2 = 0.1059                   |                        |
| Absolute structure parameter      | 0.011(6)                                    |                        |
| Extinction coefficient            | n/a                                         |                        |
| Largest diff. peak and hole       | 1.323 and -0.713 e.Å <sup>-3</sup>          |                        |

Table 2. Atomic coordinates ( $\times 10^4$ ) and equivalent isotropic displacement parameters ( $\text{\AA}^2 \times 10^3$ ) for baran736.  $U(\text{eq})$  is defined as one third of the trace of the orthogonalized  $U^{ij}$  tensor.

|       | x        | y        | z       | $U(\text{eq})$ |
|-------|----------|----------|---------|----------------|
| Br(1) | 4144(1)  | 10144(1) | 3028(1) | 46(1)          |
| Br(2) | -272(1)  | 13874(1) | 3315(1) | 44(1)          |
| O(1)  | -2231(4) | 7758(4)  | 5303(2) | 43(1)          |
| O(2)  | -1519(4) | 8815(4)  | 4670(2) | 45(1)          |
| O(3)  | 3016(3)  | 8020(3)  | 6059(2) | 34(1)          |
| O(4)  | 2771(5)  | 6427(4)  | 6086(2) | 50(1)          |
| O(5)  | 1852(4)  | 10861(3) | 3725(1) | 33(1)          |
| O(6)  | 1406(3)  | 9913(3)  | 5534(1) | 31(1)          |
| N(1)  | 3185(4)  | 8912(4)  | 5150(2) | 29(1)          |
| N(2)  | 1665(4)  | 11191(4) | 4512(2) | 26(1)          |
| N(3)  | 359(4)   | 9141(4)  | 4887(2) | 28(1)          |
| C(1)  | -4937(9) | 6712(8)  | 5164(5) | 77(3)          |
| C(2)  | -4077(6) | 6909(6)  | 5341(3) | 51(2)          |
| C(3)  | -3133(6) | 7875(6)  | 5245(4) | 49(2)          |
| C(4)  | -1453(5) | 8339(5)  | 5006(2) | 32(1)          |
| C(5)  | -478(5)  | 8338(5)  | 5151(2) | 28(1)          |
| C(6)  | -552(5)  | 7294(5)  | 5059(2) | 31(1)          |
| C(7)  | 357(5)   | 7288(4)  | 5278(2) | 30(1)          |
| C(8)  | 302(5)   | 6868(4)  | 5738(2) | 31(1)          |
| C(9)  | 1171(5)  | 7064(5)  | 5993(2) | 33(1)          |
| C(10) | 2120(5)  | 7698(5)  | 5783(2) | 31(1)          |
| C(11) | 3241(5)  | 7297(5)  | 6213(2) | 34(1)          |
| C(12) | 4135(5)  | 7742(5)  | 6554(2) | 37(1)          |
| C(13) | 4334(7)  | 6887(7)  | 6715(4) | 57(2)          |
| C(14) | 5086(7)  | 8577(8)  | 6296(4) | 67(2)          |
| C(15) | 3852(9)  | 8150(9)  | 7004(3) | 67(3)          |
| C(16) | 2215(4)  | 8133(4)  | 5319(2) | 27(1)          |
| C(17) | 1308(5)  | 7865(5)  | 5065(2) | 29(1)          |
| C(18) | 3545(5)  | 9920(5)  | 5392(2) | 31(1)          |
| C(19) | 3803(4)  | 10710(4) | 4973(2) | 29(1)          |
| C(20) | 3755(4)  | 10109(4) | 4527(2) | 29(1)          |

|       |         |          |         |       |
|-------|---------|----------|---------|-------|
| C(21) | 4011(5) | 10452(5) | 4046(2) | 34(1) |
| C(22) | 3876(5) | 9729(5)  | 3695(2) | 34(1) |
| C(23) | 3508(5) | 8708(5)  | 3807(2) | 34(1) |
| C(24) | 3253(5) | 8383(5)  | 4291(2) | 35(1) |
| C(25) | 3369(4) | 9082(4)  | 4646(2) | 27(1) |
| C(26) | 3115(4) | 11204(4) | 4930(2) | 28(1) |
| C(27) | 2044(4) | 10550(4) | 4718(2) | 25(1) |
| C(28) | 1606(4) | 11294(4) | 4029(2) | 25(1) |
| C(29) | 1197(5) | 11977(4) | 3871(2) | 28(1) |
| C(30) | 1085(5) | 12643(5) | 4179(2) | 36(1) |
| C(31) | 666(6)  | 13213(5) | 4019(3) | 39(1) |
| C(32) | 356(5)  | 13122(5) | 3536(2) | 35(1) |
| C(33) | 482(6)  | 12502(6) | 3214(3) | 44(2) |
| C(34) | 908(6)  | 11932(6) | 3379(2) | 42(2) |
| C(35) | 1236(4) | 9833(4)  | 5094(2) | 25(1) |
| CI(1) | 1510(3) | 5676(2)  | 4620(1) | 93(1) |
| CI(2) | 1168(2) | 3992(2)  | 5266(1) | 51(1) |
| C(36) | 1277(9) | 5205(7)  | 5214(3) | 61(2) |

---

Table 3. Bond lengths [ $\text{\AA}$ ] and angles [ $^\circ$ ] for baran736.

|             |           |                  |           |
|-------------|-----------|------------------|-----------|
| Br(1)-C(22) | 1.905(6)  | C(19)-C(26)      | 1.562(8)  |
| Br(2)-C(32) | 1.912(6)  | C(20)-C(21)      | 1.396(9)  |
| O(1)-C(3)   | 1.473(9)  | C(20)-C(25)      | 1.400(8)  |
| O(1)-C(4)   | 1.338(8)  | C(21)-C(22)      | 1.393(9)  |
| O(2)-C(4)   | 1.203(9)  | C(22)-C(23)      | 1.392(10) |
| O(3)-C(10)  | 1.411(7)  | C(23)-C(24)      | 1.398(9)  |
| O(3)-C(11)  | 1.368(8)  | C(24)-C(25)      | 1.382(9)  |
| O(4)-C(11)  | 1.195(9)  | C(26)-C(27)      | 1.532(8)  |
| O(5)-C(28)  | 1.227(7)  | C(27)-C(35)      | 1.550(8)  |
| O(6)-C(35)  | 1.225(7)  | C(28)-C(29)      | 1.511(8)  |
| N(1)-C(16)  | 1.426(8)  | C(29)-C(30)      | 1.388(9)  |
| N(1)-C(18)  | 1.495(8)  | C(29)-C(34)      | 1.406(9)  |
| N(1)-C(25)  | 1.406(8)  | C(30)-C(31)      | 1.375(9)  |
| N(2)-C(27)  | 1.467(7)  | C(31)-C(32)      | 1.385(10) |
| N(2)-C(28)  | 1.340(7)  | C(32)-C(33)      | 1.370(10) |
| N(3)-C(5)   | 1.438(8)  | C(33)-C(34)      | 1.388(10) |
| N(3)-C(35)  | 1.339(8)  | Cl(1)-C(36)      | 1.739(10) |
| C(1)-C(2)   | 1.279(14) | Cl(2)-C(36)      | 1.769(9)  |
| C(2)-C(3)   | 1.472(11) |                  |           |
| C(4)-C(5)   | 1.531(8)  | C(4)-O(1)-C(3)   | 114.9(6)  |
| C(5)-C(6)   | 1.550(8)  | C(11)-O(3)-C(10) | 118.1(5)  |
| C(6)-C(7)   | 1.508(8)  | C(16)-N(1)-C(18) | 113.8(5)  |
| C(7)-C(8)   | 1.392(9)  | C(25)-N(1)-C(16) | 119.8(5)  |
| C(7)-C(17)  | 1.386(9)  | C(25)-N(1)-C(18) | 108.0(5)  |
| C(8)-C(9)   | 1.386(9)  | C(28)-N(2)-C(27) | 121.8(5)  |
| C(9)-C(10)  | 1.394(10) | C(35)-N(3)-C(5)  | 124.2(5)  |
| C(10)-C(16) | 1.404(8)  | C(1)-C(2)-C(3)   | 122.4(9)  |
| C(11)-C(12) | 1.498(9)  | C(2)-C(3)-O(1)   | 111.1(6)  |
| C(12)-C(13) | 1.535(10) | O(1)-C(4)-C(5)   | 112.1(5)  |
| C(12)-C(14) | 1.534(12) | O(2)-C(4)-O(1)   | 123.2(6)  |
| C(12)-C(15) | 1.533(12) | O(2)-C(4)-C(5)   | 124.6(6)  |
| C(16)-C(17) | 1.406(8)  | N(3)-C(5)-C(4)   | 108.3(5)  |
| C(18)-C(19) | 1.559(8)  | N(3)-C(5)-C(6)   | 111.5(5)  |
| C(19)-C(20) | 1.505(8)  | C(4)-C(5)-C(6)   | 112.5(5)  |

|                   |          |                   |          |
|-------------------|----------|-------------------|----------|
| C(7)-C(6)-C(5)    | 110.0(5) | C(24)-C(25)-N(1)  | 127.6(6) |
| C(8)-C(7)-C(6)    | 121.0(5) | C(24)-C(25)-C(20) | 120.8(6) |
| C(17)-C(7)-C(6)   | 119.7(5) | C(27)-C(26)-C(19) | 117.7(4) |
| C(17)-C(7)-C(8)   | 118.3(6) | N(2)-C(27)-C(26)  | 110.9(4) |
| C(9)-C(8)-C(7)    | 121.6(6) | N(2)-C(27)-C(35)  | 106.5(4) |
| C(8)-C(9)-C(10)   | 118.9(6) | C(26)-C(27)-C(35) | 114.4(4) |
| C(9)-C(10)-O(3)   | 120.1(5) | O(5)-C(28)-N(2)   | 123.3(5) |
| C(9)-C(10)-C(16)  | 121.7(5) | O(5)-C(28)-C(29)  | 120.8(5) |
| C(16)-C(10)-O(3)  | 117.8(6) | N(2)-C(28)-C(29)  | 115.8(5) |
| O(3)-C(11)-C(12)  | 111.3(5) | C(30)-C(29)-C(28) | 124.5(5) |
| O(4)-C(11)-O(3)   | 123.0(6) | C(30)-C(29)-C(34) | 117.8(6) |
| O(4)-C(11)-C(12)  | 125.7(6) | C(34)-C(29)-C(28) | 117.7(5) |
| C(11)-C(12)-C(13) | 108.3(6) | C(31)-C(30)-C(29) | 121.8(6) |
| C(11)-C(12)-C(14) | 110.5(6) | C(30)-C(31)-C(32) | 118.7(6) |
| C(11)-C(12)-C(15) | 108.0(6) | C(31)-C(32)-Br(2) | 119.2(5) |
| C(14)-C(12)-C(13) | 109.2(7) | C(33)-C(32)-Br(2) | 119.2(5) |
| C(15)-C(12)-C(13) | 108.9(7) | C(33)-C(32)-C(31) | 121.7(6) |
| C(15)-C(12)-C(14) | 112.0(8) | C(32)-C(33)-C(34) | 119.0(6) |
| C(10)-C(16)-N(1)  | 120.2(5) | C(33)-C(34)-C(29) | 120.8(7) |
| C(10)-C(16)-C(17) | 117.0(5) | O(6)-C(35)-N(3)   | 124.7(5) |
| C(17)-C(16)-N(1)  | 122.3(5) | O(6)-C(35)-C(27)  | 121.9(5) |
| C(7)-C(17)-C(16)  | 122.3(5) | N(3)-C(35)-C(27)  | 113.4(4) |
| N(1)-C(18)-C(19)  | 106.5(5) | Cl(1)-C(36)-Cl(2) | 113.3(5) |
| C(18)-C(19)-C(26) | 116.9(5) |                   |          |
| C(20)-C(19)-C(18) | 102.3(5) |                   |          |
| C(20)-C(19)-C(26) | 112.8(5) |                   |          |
| C(21)-C(20)-C(19) | 128.3(5) |                   |          |
| C(21)-C(20)-C(25) | 121.1(6) |                   |          |
| C(25)-C(20)-C(19) | 110.6(5) |                   |          |
| C(22)-C(21)-C(20) | 116.9(6) |                   |          |
| C(21)-C(22)-Br(1) | 118.5(5) |                   |          |
| C(23)-C(22)-Br(1) | 118.7(5) |                   |          |
| C(23)-C(22)-C(21) | 122.8(6) |                   |          |
| C(22)-C(23)-C(24) | 119.2(6) |                   |          |
| C(25)-C(24)-C(23) | 119.1(6) |                   |          |
| C(20)-C(25)-N(1)  | 111.5(5) |                   |          |

Symmetry transformations used to generate equivalent atoms:

Table 4. Anisotropic displacement parameters ( $\text{\AA}^2 \times 10^3$ ) for baran736. The anisotropic displacement factor exponent takes the form:  $-2\pi^2 [h^2 a^{*2} U^{11} + \dots + 2 h k a^* b^* U^{12}]$

|       | U <sup>11</sup> | U <sup>22</sup> | U <sup>33</sup> | U <sup>23</sup> | U <sup>13</sup> | U <sup>12</sup> |
|-------|-----------------|-----------------|-----------------|-----------------|-----------------|-----------------|
| Br(1) | 52(1)           | 54(1)           | 28(1)           | 1(1)            | 6(1)            | 22(1)           |
| Br(2) | 48(1)           | 41(1)           | 52(1)           | 7(1)            | -4(1)           | 28(1)           |
| O(1)  | 35(2)           | 44(3)           | 51(3)           | 6(2)            | 10(2)           | 21(2)           |
| O(2)  | 49(3)           | 70(3)           | 29(2)           | 1(2)            | -2(2)           | 40(3)           |
| O(3)  | 36(2)           | 28(2)           | 36(2)           | 0(2)            | -11(2)          | 15(2)           |
| O(4)  | 55(3)           | 39(3)           | 62(3)           | -7(2)           | -24(3)          | 27(2)           |
| O(5)  | 50(3)           | 35(2)           | 21(2)           | -4(2)           | -4(2)           | 26(2)           |
| O(6)  | 34(2)           | 36(2)           | 21(2)           | 1(2)            | -3(2)           | 17(2)           |
| N(1)  | 30(2)           | 31(2)           | 28(2)           | 2(2)            | -1(2)           | 17(2)           |
| N(2)  | 36(3)           | 33(2)           | 18(2)           | -1(2)           | 0(2)            | 23(2)           |
| N(3)  | 31(2)           | 34(2)           | 20(2)           | -2(2)           | -5(2)           | 18(2)           |
| C(1)  | 62(6)           | 51(5)           | 116(10)         | -2(5)           | -6(6)           | 27(5)           |
| C(2)  | 40(4)           | 45(4)           | 60(5)           | 5(3)            | 9(3)            | 15(3)           |
| C(3)  | 32(3)           | 37(4)           | 77(5)           | 4(3)            | 6(3)            | 16(3)           |
| C(4)  | 34(3)           | 38(3)           | 27(3)           | -9(2)           | -2(2)           | 21(3)           |
| C(5)  | 30(3)           | 36(3)           | 19(2)           | -2(2)           | -2(2)           | 18(2)           |
| C(6)  | 36(3)           | 32(3)           | 21(3)           | 0(2)            | 0(2)            | 14(2)           |
| C(7)  | 34(3)           | 29(3)           | 23(3)           | -3(2)           | -5(2)           | 13(2)           |
| C(8)  | 35(3)           | 29(3)           | 29(3)           | -1(2)           | -4(2)           | 16(2)           |
| C(9)  | 44(3)           | 31(3)           | 25(3)           | -1(2)           | -6(2)           | 20(3)           |
| C(10) | 39(3)           | 33(3)           | 27(3)           | -3(2)           | -9(2)           | 24(3)           |
| C(11) | 36(3)           | 40(3)           | 31(3)           | 1(2)            | -5(2)           | 23(3)           |
| C(12) | 39(3)           | 39(3)           | 34(3)           | 3(3)            | -10(3)          | 21(3)           |
| C(13) | 55(4)           | 52(4)           | 71(6)           | 8(4)            | -18(4)          | 33(4)           |
| C(14) | 41(4)           | 66(6)           | 81(6)           | 15(5)           | -2(4)           | 18(4)           |
| C(15) | 83(6)           | 88(7)           | 50(5)           | -29(5)          | -33(5)          | 56(6)           |
| C(16) | 27(3)           | 24(2)           | 31(3)           | 0(2)            | 0(2)            | 14(2)           |
| C(17) | 37(3)           | 31(3)           | 23(3)           | 1(2)            | -3(2)           | 22(2)           |
| C(18) | 32(3)           | 32(3)           | 29(3)           | -1(2)           | -7(2)           | 15(2)           |
| C(19) | 27(2)           | 30(3)           | 29(3)           | 0(2)            | -2(2)           | 13(2)           |
| C(20) | 26(3)           | 32(3)           | 28(3)           | 0(2)            | -3(2)           | 14(2)           |

|       |        |       |       |        |        |       |
|-------|--------|-------|-------|--------|--------|-------|
| C(21) | 28(3)  | 37(3) | 35(3) | 4(2)   | 2(2)   | 15(2) |
| C(22) | 30(3)  | 42(3) | 29(3) | 0(2)   | 3(2)   | 18(3) |
| C(23) | 33(3)  | 41(3) | 30(3) | -5(2)  | 2(2)   | 19(3) |
| C(24) | 36(3)  | 27(3) | 41(3) | -3(2)  | -4(3)  | 15(3) |
| C(25) | 22(2)  | 32(3) | 25(3) | -4(2)  | -4(2)  | 12(2) |
| C(26) | 32(3)  | 26(2) | 26(3) | 0(2)   | 0(2)   | 15(2) |
| C(27) | 31(3)  | 26(2) | 22(3) | -1(2)  | -2(2)  | 18(2) |
| C(28) | 29(3)  | 23(2) | 22(3) | -2(2)  | -3(2)  | 12(2) |
| C(29) | 34(3)  | 26(3) | 21(2) | 5(2)   | 2(2)   | 15(2) |
| C(30) | 46(3)  | 42(3) | 30(3) | -3(3)  | 0(2)   | 29(3) |
| C(31) | 52(4)  | 40(3) | 33(3) | 3(3)   | 1(3)   | 29(3) |
| C(32) | 37(3)  | 31(3) | 39(3) | 5(2)   | -5(3)  | 19(3) |
| C(33) | 54(4)  | 51(4) | 32(3) | -2(3)  | -11(3) | 31(3) |
| C(34) | 60(4)  | 48(4) | 27(3) | -4(3)  | -11(3) | 33(3) |
| C(35) | 29(3)  | 30(3) | 19(3) | 0(2)   | -2(2)  | 18(2) |
| CI(1) | 137(3) | 48(1) | 74(2) | 5(1)   | 4(2)   | 31(1) |
| CI(2) | 76(1)  | 56(1) | 35(1) | -4(1)  | -2(1)  | 44(1) |
| C(36) | 85(6)  | 56(5) | 51(5) | -13(4) | -12(4) | 42(5) |

---



Table 5. Hydrogen coordinates ( $\times 10^4$ ) and isotropic displacement parameters ( $\text{\AA}^2 \times 10^{-3}$ ) for baran736.

|        | x        | y         | z        | U(eq) |
|--------|----------|-----------|----------|-------|
| H(2)   | 1560(60) | 11550(50) | 4730(20) | 32    |
| H(3)   | 240(60)  | 9140(60)  | 4574(8)  | 33    |
| H(1A)  | -4983    | 7197      | 4962     | 92    |
| H(1B)  | -5531    | 6079      | 5235     | 92    |
| H(2A)  | -4046    | 6415      | 5542     | 61    |
| H(3A)  | -3109    | 8493      | 5157     | 59    |
| H(5)   | -360     | 8493      | 5508     | 33    |
| H(6A)  | -1185    | 6746      | 5208     | 37    |
| H(6B)  | -579     | 7165      | 4703     | 37    |
| H(8)   | -347     | 6436      | 5879     | 37    |
| H(9)   | 1120     | 6771      | 6306     | 40    |
| H(13A) | 3744     | 6371      | 6897     | 85    |
| H(13B) | 4939     | 7170      | 6924     | 85    |
| H(13C) | 4446     | 6573      | 6426     | 85    |
| H(14A) | 5212     | 8299      | 5997     | 100   |
| H(14B) | 5675     | 8820      | 6514     | 100   |
| H(14C) | 4979     | 9145      | 6211     | 100   |
| H(15A) | 3652     | 8645      | 6901     | 101   |
| H(15B) | 4440     | 8482      | 7224     | 101   |
| H(15C) | 3282     | 7585      | 7175     | 101   |
| H(17)  | 1349     | 8088      | 4737     | 35    |
| H(18A) | 4157     | 10106     | 5593     | 37    |
| H(18B) | 3007     | 9894      | 5606     | 37    |
| H(19)  | 4523     | 11269     | 5017     | 35    |
| H(21)  | 4267     | 11146     | 3962     | 41    |
| H(23)  | 3431     | 8238      | 3558     | 41    |
| H(24)  | 3003     | 7690      | 4375     | 42    |
| H(26A) | 3046     | 11429     | 5261     | 33    |
| H(26B) | 3479     | 11822     | 4725     | 33    |
| H(27)  | 2080     | 10123     | 4449     | 30    |

|        |      |       |      |    |
|--------|------|-------|------|----|
| H(30)  | 1304 | 12706 | 4509 | 43 |
| H(31)  | 590  | 13660 | 4236 | 47 |
| H(33)  | 281  | 12463 | 2882 | 52 |
| H(34)  | 1006 | 11507 | 3157 | 51 |
| H(36A) | 639  | 5161  | 5332 | 73 |
| H(36B) | 1837 | 5690  | 5428 | 73 |

---

Table 6. Hydrogen bonds for baran736 [ $\text{\AA}$  and  $^\circ$ ].

| D-H...A            | d(D-H)    | d(H...A) | d(D...A) | $\angle(\text{DHA})$ |
|--------------------|-----------|----------|----------|----------------------|
| N(2)-H(2)...O(5)#1 | 0.875(15) | 2.15(3)  | 2.977(6) | 158(7)               |
| N(3)-H(3)...O(6)#2 | 0.874(15) | 2.10(4)  | 2.918(6) | 155(7)               |

Symmetry transformations used to generate equivalent atoms:

#1  $x-y+1, x+1, z+1/6$  #2  $y-1, -x+y, z-1/6$

## Tryptorubin biosynthesis

### Bioinformatic analysis

Genome sequences were analyzed using Geneious 11.1.3, antiSMASH5.0<sup>37</sup> and PRISM3.<sup>38</sup> The genome sequences of *Streptomyces* sp. CLI2509 (CP021118.1), *Streptomyces* sp. SPB78 (GG657742.1) and *Streptomyces* sp. Tu6071 (NZ\_AFHJ00000000.1) were retrieved from GenBank, translated in all six reading frames and screened for the core peptide sequence (AWYIWY). The genomes of tryptorubin producers<sup>12</sup> were compared to closely related *Streptomyces* species as determined by 16S rRNA homology to verify that the putative *trp* BGC is only present in tryptorubin producers. Homologous gene clusters were identified by Blast-search of the P450 protein sequence and manual annotation of the precursor gene. Homologous precursor and P450 sequences were retrieved from GenBank and MUSCLE aligned. In the case of P450s, characterized P450s not involved in tryptorubin biosynthesis were retrieved from GenBank and aligned with the tryptorubin associated P450s. A maximum likelihood phylogenetic tree (bootstrap replicas 1000) was constructed from the P450 alignment using Geneious and visualized using iTOL.<sup>39</sup> Transcription start sites were determined using BPROM. Genome neighborhood diagrams were generated using the EFI Genome Neighborhood tool.

### Cultivation, Extraction and Analysis

*Xanthomonas* sp. Leaf148 was inoculated into ISP2 medium (6 x 1 L) and cultured in 2.5 L Ultra-High-Yield baffled flasks at 28 °C and 220 rpm shaking for 6 days with HP20 beads (4% by weight). Cultures were subsequently filtered, the beads washed with water and methanol and subsequently extracted with acetone overnight. Acetone was removed under reduced pressure, the extract resuspended in methanol and subjected to liquid chromatography-high resolution electrospray ionization tandem mass spectrometry using an Agilent 1290 Infinity HPLC connected to an Agilent 6530 Accurate-Mass Q-TOF mass spectrometer. The crude extract was separated by reversed-phase HPLC (Phenomenex Kinetex 2.6 µm, C18 100 A) column (100 x 2.1 mm), a flow rate of 0.3 mL and a water to acetonitrile gradient over 22 mins (0-2 min 10% ACN, 2-18 min 10-100 % ACN, 18-22 min 100% ACN). The mass spectrometer was operated in positive mode, the mass range was set from 500 to 100 Da and the collision energy from 20-50. Raw data were converted into mzxml format and subjected to molecular network analysis using GNPS<sup>40</sup>. The data was filtered by removing all MS/MS peaks within +/- 17 Da of the

---

<sup>37</sup> Blin, K. et al. antiSMASH 5.0: updates to the secondary metabolite genome mining pipeline. *Nucleic Acids Res* 47, W81-W87, doi:10.1093/nar/gkz310 (2019).

<sup>38</sup> Skinnider, M. A., Merwin, N. J., Johnston, C. W. & Magarvey, N. A. PRISM 3: expanded prediction of natural product chemical structures from microbial genomes. *Nucleic Acids Res* 45, W49-W54, doi:10.1093/nar/gkx320 (2017).

<sup>39</sup> Letunic, I. & Bork, P. Interactive Tree Of Life (iTOL) v4: recent updates and new developments. *Nucleic Acids Res* 47, W256-W259, doi:10.1093/nar/gkz239 (2019).

<sup>40</sup> Wang, M. X. et al. Sharing and community curation of mass spectrometry data with Global Natural Products Social Molecular Networking. *Nat. Biotechnol.* 34, 828-837, doi:10.1038/nbt.3597 (2016).

precursor *m/z*. MS/MS spectra were window filtered by choosing only the top 6 peaks in the +/- 50 Da window throughout the spectrum. The data was then clustered with MS-Cluster with a parent mass tolerance of 2.0 Da and a MS/MS fragment ion tolerance of 0.5 Da to create consensus spectra. A network was then created where edges were filtered to have a cosine score above 0.5 and more than 4 matched peaks. The resulting network was visualized using Cytoscape 3.7.1.

**Table S14:** Proteins encoded in the tryptorubin (*trp*) BGC including surrounding genes, deduced protein functions and accession numbers.

| protein name | residues | function                                           | similarity/<br>identity<br>(%) | closest<br>homolog                      | accession<br>number |
|--------------|----------|----------------------------------------------------|--------------------------------|-----------------------------------------|---------------------|
|              | 103      | 4 $\alpha$ -hydroxytetrahydrobiopterin dehydratase | 99/99                          | <i>Streptomyces</i> sp. GZWMJZ-114      | WP_129284629.1      |
|              | 238      | SAM dependent methyltransferase                    | 100/99                         | <i>Streptomyces</i> sp. SolWspMP-sol7th | WP_093854812.1      |
|              | 261      | oxidoreductase                                     | 99/99                          | <i>Streptomyces</i> sp. SolWspMP-sol7th | WP_093854814.1      |
|              | 607      | Long chain fatty acid CoA ligase                   | 99/99                          | <i>Streptomyces</i> sp. SolWspMP-sol7th | WP_093854811.1      |
| TrpA         | 26       | precursor peptide (hypothetical protein)           | 69/69                          | <i>Streptomyces misionensis</i>         | SEB93745.1          |
| TrpB         | 348      | cytochrome P450                                    | 99/99                          | <i>Streptomyces</i> sp. LcepLS          | WP_093582223.1      |
|              | 192      | N-acetyl transferase                               | 92/92                          | <i>Streptomyces</i> sp. SolWspMP-sol7th | WP_093854810.1      |

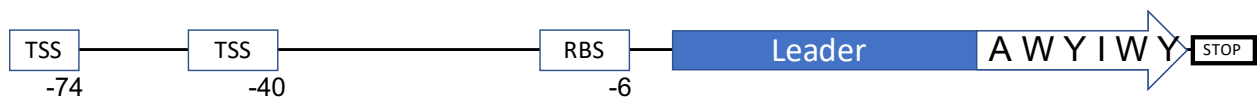

**Figure S17:** Graphical representation of *in-silico* analyses of the previously unannotated *trpA* gene. *trpA* putatively encodes the tryptorubin precursor peptide, is directly followed by a stop codon and has the typical features of a prokaryotic gene including a ribosomal binding site (RBS, Shine-Dalgarno sequence) and two elements required to initiate transcription (TSS, transcription start site).



**Figure S19, see Supplementary Datafile S19. Caption:** Genome neighborhood analysis of putative tryptorubin-like peptide producers. TrpB was used as query for the analysis. Cytochrome P450s are highlighted in red. Since TrpA homologs are usually not annotated as proteins, most homologs are missed in the Genome Neighborhood Diagram. The diagram shows the wide variety of putative tryptorubin-like peptide producers and suggests that the minimal *trp* BGC consist of only the precursor gene *trpA* and its associated gene, *trpB*, encoding a cytochrome P450. No other gene is conserved in other putative *trp* BGCs.

**Figure S20, see Supplementary Datafile S20. Caption:** Phylogenetic analysis of 550 cytochrome P450 amino acid sequences. The top 50 hits from the genome neighborhood analysis were compared to a representative group of 500 P450 enzymes associated with bacterial secondary metabolism, retrieved from the antiSMASH database. The top 250 hits from both smCoG hit queries (SMCOG1007 and SMCOG1034) were selected, MUSCLE aligned with the P450s from tryptorubin-like BGCs and a maximum likelihood phylogenetic tree with 1000 bootstrap replicas computed. The *trp*-encoded P450 group together to form a unique phylogenetic clade of enzymes that are likely responsible for the unusual C-C and C-N bridge formations.

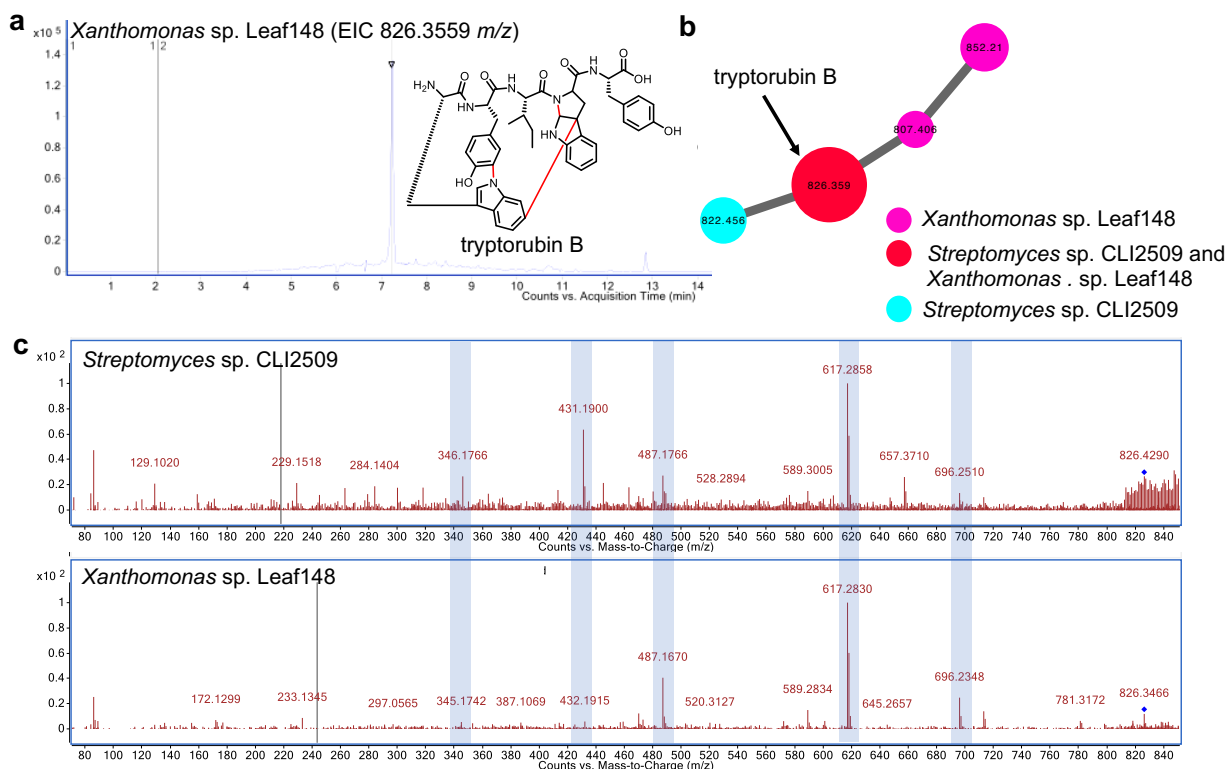

**Figure S21: *Xanthomonas* sp. Leaf148 produces a tryptorubin-like peptide.** a) Extracted ion chromatogram of  $m/z$  826.3559  $[M+H]^+$  (tryptorubin B). b) Detail of molecular network representation of data-dependent MS/MS data of *Xanthomonas* sp. Leaf148 and *Streptomyces* sp. CLI2509 (known tryptorubin B producer) extracts. Nodes represent molecules that share MS/MS fragmentation patterns and interconnecting edges

indicate structural similarity based on common MS/MS features. The detection of a metabolite with a  $m/z$  of 826.359 in both the reported tryptorubin B producer and *Xanthomonas* sp. Leaf148 indicates that *Xanthomonas* sp. Leaf148 produces a tryptorubin-like metabolite. c) Comparison of MS/MS spectra from both producers. Blue bars highlight characteristic high-intensity fragment ions common for both MS/MS spectra. Although the fragmentation pattern and associated  $m/z$  values are in excellent agreement, the retention times differ by 3%, which could indicate a slight structural difference.
